# Supplementary material for: Single-Nucleotide RNA Maps for the Two Major Nosocomial Pathogens Enterococcus faecalis and Enterococcus faecium
Source: Front Cell Infect Microbiol. 2020 Nov 25;10:600325. doi: 10.3389/fcimb.2020.600325 (PMC7724050; doi:10.3389/fcimb.2020.600325)
Supplement: Supplementary Table 4 — Rfam predictions. [file Table_4.xlsx]

## Sheet: E. faecalis V583
Table S4. Rfam predictions for E. faecalis V583
list does not include tRNA and rRNA predictions
The predicted Rho-independed terminators (RIT) and sRNA column refers to terminators and sRNAs predicted in this study
Expression in comment column refers to conditions used in this study
target name	Rfam accession	query name	mdl	mdl from	mdl to	seq from	seq to	strand	trunc	gc	position	UTR length	associated gene	predicted RIT (this study)	predicted sRNA (this study)	comment
riboswitches
AdoCbl_riboswitch	RF01482	NC_004668.1	cm	1	149	1591208	1591059	-	no	0.39	intergenic	447	EF1635	yes	sRNA_075
Cobalamin	RF00174	NC_004668.1	cm	1	191	1595497	1595326	-	no	0.4	5'UTR	407	EF1641	-	sRNA_077
Fluoride	RF01734	NC_004668.1	cm	1	63	2384514	2384445	-	no	0.4	5'UTR	153	EF2463	yes	sRNA_102
FMN	RF00050	NC_004668.1	cm	1	140	1495313	1495432	+	no	0.45	5'UTR	271	EF1541	-	sRNA_071
glmS	RF00234	NC_004668.1	cm	1	171	2055460	2055313	-	no	0.47	5'UTR	263	EF2151	-	-
Lysine	RF00168	NC_004668.1	cm	1	183	224792	224618	-	no	0.46	5'UTR	396	EF0247	-	sRNA_010
PreQ1	RF00522	NC_004668.1	cm	1	45	2504809	2504853	+	no	0.4	5'UTR	144	EF2587	-	-
Purine	RF00167	NC_004668.1	cm	1	102	2288426	2288329	-	no	0.43	5'UTR	242	EF2365	-	sRNA_099
SMK_box_riboswitch	RF01767	NC_004668.1	cm	1	84	743416	743511	+	no	0.34	5'UTR	89	EF0784	-	-
THF	RF01831	NC_004668.1	cm	1	100	903574	903741	+	no	0.4	5'UTR	228	EF0940	yes	-
TPP	RF00059	NC_004668.1	cm	1	105	2676348	2676258	-	no	0.43	5'UTR	205	EF2770	-	sRNA_114
TPP	RF00059	NC_004668.1	cm	1	105	2683651	2683563	-	no	0.43	5'UTR	194	EF2778	-	sRNA_117
ykoK	RF00380	NC_004668.1	cm	1	169	1024864	1024697	-	no	0.39	intergenic	NA	NA	-	sRNA_051
ykoK	RF00380	NC_004668.1	cm	1	169	1027779	1027612	-	no	0.38	5'UTR	236	EF1054	-	-
ykoK	RF00380	NC_004668.1	cm	1	169	1268265	1268435	+	no	0.4	5'UTR	291	EF1304	-	sRNA_062
ykoK	RF00380	NC_004668.1	cm	1	169	1323290	1323457	+	no	0.41	5'UTR	284	EF1351	yes	sRNA_064
ykoK	RF00380	NC_004668.1	cm	1	169	3116366	3116532	+	no	0.4	5'UTR	139	EF3244	-	-
DUF1646	RF03071	NC_004668.1	cm	1	55	1447313	1447360	+	no	0.48	intergenic	NA	NA	-	sRNA_069	DUF1646 RNA
T-boxes
T-box	RF00230	NC_004668.1	cm	1	224	47432	47638	+	no	0.44	3'UTR	239	EF0043	yes	-
T-box	RF00230	NC_004668.1	cm	1	224	367335	367564	+	no	0.39	5'UTR	297	EF0395	-	sRNA_014
T-box	RF00230	NC_004668.1	cm	1	224	587030	587244	+	no	0.37	5'UTR	416	EF0633	-	sRNA_033
T-box	RF00230	NC_004668.1	cm	1	224	761240	761472	+	no	0.4	5'UTR	360	EF0801	-	-
T-box	RF00230	NC_004668.1	cm	1	224	767436	767194	-	no	0.37	5'UTR	686	EF0806			stacking type
T-box	RF00230	NC_004668.1	cm	1	224	767824	767592	-	no	0.41	5'UTR	686	EF0806	-	sRNA_038	stacking type
T-box	RF00230	NC_004668.1	cm	1	224	1087618	1087836	+	no	0.38	5'UTR	289	EF1115	yes	-
T-box	RF00230	NC_004668.1	cm	1	224	2003684	2003434	-	no	0.44	5'UTR	311	EF2082	-	sRNA_090
T-box	RF00230	NC_004668.1	cm	1	224	2004416	2004171	-	no	0.37	intergenic	NA	NA	-	sRNA_091
T-box	RF00230	NC_004668.1	cm	1	224	2424006	2423759	-	no	0.41	5'UTR	372	EF2498	yes	-
T-box	RF00230	NC_004668.1	cm	1	224	2812613	2812374	-	no	0.41	5'UTR	340	EF2931	yes	-
T-box	RF00230	NC_004668.1	cm	1	224	2957203	2956958	-	no	0.43	5'UTR	329	EF3081	-	sRNA_124
T-box	RF00230	NC_004668.1	cm	1	224	3172610	3172818	+	no	0.45	5'UTR	301	EF3292	yes	-
ribosomal protein elements
L10_leader	RF00557	NC_004668.1	cm	1	139	2629755	2629626	-	no	0.4	5'UTR	260	EF2716	-	-
L13_leader	RF00555	NC_004668.1	cm	1	60	3101050	3100987	-	no	0.42	5'UTR	464	EF3230	-	-
L17DE	RF01708	NC_004668.1	cm	1	76	212775	212845	+	no	0.51	3'UTR	170	EF0234	yes	-
L20_leader	RF00558	NC_004668.1	cm	1	127	880569	880700	+	no	0.4	5'UTR	192	EF0914	-	-
L21_leader	RF00559	NC_004668.1	cm	1	78	931220	931295	+	no	0.43	5'UTR	113	EF0968	-	-
thermoregulators
cspA	RF01766	NC_004668.1	cm	1	428	1344087	1343701	-	no	0.36	interCDS	119	EF1367	yes	-
other cis-regulatory elements
pan	RF01749	NC_004668.1	cm	1	93	1807268	1807187	-	no	0.27	5'UTR	108	EF1861	-	-
Lacto-rpoB	RF01709	NC_004668.1	cm	1	58	3112617	3112562	-	no	0.39	5'UTR	227	EF3238	-	-
PyrR	RF00515	NC_004668.1	cm	1	126	1672563	1672404	-	no	0.42	5'UTR	309	EF1721	-	-
toxin-antitoxin system
RatA	RF01776	NC_004668.1	cm	1	90	3031723	3031808	+	no	0.38	intergenic	NA	NA	-	sRNA_127
RatA	RF01776	NC_004668.1	cm	1	90	3032845	3032930	+	no	0.31	intergenic	NA	NA	yes	-
RatA	RF01776	NC_004668.1	cm	1	90	3118392	3118304	-	no	0.34	antisense	NA	EF3245	yes	-
RatA	RF01776	NC_004668.1	cm	1	90	3118683	3118598	-	no	0.38	antisense	NA	EF3245	-	sRNA_135
RatA	RF01776	NC_004668.1	cm	1	90	3119060	3118974	-	no	0.31	antisense	NA	EF3247	-	-
RatA	RF01776	NC_004668.1	cm	1	90	3123371	3123286	-	no	0.35	intergenic	NA	NA	-	-
RatA	RF01776	NC_004668.1	cm	1	90	3123745	3123660	-	no	0.36	intergenic	NA	NA	-	sRNA_138
predicted sRNAs
Anti-Q_RNA	RF00388	NC_004669.1	cm	1	103	44522	44623	+	no	0.33	antisense	NA	EFA0056	-	sRNA_149
Anti-Q_RNA	RF00388	NC_004669.1	cm	1	103	5415	5306	-	no	0.39	interCDS	NA	NA	-	-
Anti-Q_RNA	RF00388	NC_004671.1	cm	1	103	5476	5375	-	no	0.41	antisense	NA	EF_B0051	-	sRNA_155
BsrC	RF01410	NC_004668.1	cm	1	87	2406126	2406039	-	no	0.33	intergenic	NA	NA	-	-
EF0605_EF0606	RF02638	NC_004668.1	cm	1	179	569151	569329	+	no	0.35	intergenic	NA	NA	-	sRNA_032	Enterococcus sRNA
EF0820_EF0821	RF02635	NC_004668.1	cm	1	370	784383	784014	-	no	0.35	5'UTR	226	EF0820	-	sRNA_039	Enterococcus sRNA
EF0869_EF0870	RF02639	NC_004668.1	cm	1	474	829525	829052	-	no	0.34	intergenic	NA	NA	-	sRNA_044	Enterococcus sRNA
EF1368_EF1369	RF02636	NC_004668.1	cm	1	626	1345556	1346183	+	no	0.37	intergenic	NA	NA	-	sRNA_066	Enterococcus sRNA
EF3314_EF3315	RF02634	NC_004668.1	cm	1	141	3201675	3201535	-	no	0.35	intergenic	NA	NA	-	sRNA_140	Enterococcus sRNA
EF0408_EF0409	RF02637	NC_004668.1	cm	1	412	381297	381708	+	no	0.32	interCDS	NA	EF0408	yes	-	Enterococcus sRNA, not expressed
Lacto-usp	RF01710	NC_004668.1	cm	1	90	1051896	1051978	+	no	0.33	5'UTR	115	EF1082	-	-
Plasmid_RNAIII	RF00235	NC_004669.1	cm	1	131	45764	45634	-	no	0.31	antisense	NA	EFA0058	-	sRNA_150
rli28	RF01492	NC_004668.1	cm	1	186	3123419	3123604	+	no	0.38	interCDS	NA	EF3249	-	-	Listeria sRNA
rli28	RF01492	NC_004668.1	cm	1	186	533073	533251	+	no	0.35	intergenic	NA	NA	-	-	Listeria sRNA
rli28	RF01492	NC_004668.1	cm	1	186	3118731	3118917	+	no	0.42	interCDS	NA	EF3247	-	-	Listeria sRNA
rli28	RF01492	NC_004668.1	cm	1	186	3140574	3140392	-	no	0.36	intergenic	NA	NA	-		Listeria sRNA
rli28	RF01492	NC_004668.1	cm	1	186	2962163	2961988	-	no	0.4	interCDS	NA	EF3087	-	-	Listeria sRNA
rli28	RF01492	NC_004668.1	cm	1	186	2962604	2962422	-	no	0.39	interCDS	NA	EF3088	-	-	Listeria sRNA
rli28	RF01492	NC_004669.1	cm	1	186	13445	13624	+	no	0.38	interCDS	NA	EFA0017	-	-	Listeria sRNA
rli28	RF01492	NC_004671.1	cm	1	186	32475	32657	+	no	0.33	intergenic	NA	NA	-	-	Listeria sRNA
rliD	RF01494	NC_004668.1	cm	1	327	2937226	2937583	+	no	0.4	antisense	NA	EF3064	-	-	Listeria sRNA
Ref66	RF02839	NC_004668.1	cm	1	118	681566	681449	-	no	0.39	antisense	NA	EF0723	-	sRNA_036	Enterococcus sRNA 66
Ref1C	RF02845	NC_004668.1	cm	1	130	2405867	2405996	+	no	0.36	intergenic	NA	NA	-	sRNA_103	Enterococcus sRNA 1C
Ref70	RF02841	NC_004668.1	cm	1	122	880359	880468	+	no	0.41	intergenic	NA	NA	-	-	Enterococcus sRNA 70
Ref64	RF02847	NC_004668.1	cm	1	69	561100	561032	-	no	0.39	intergenic	NA	NA	-	sRNA_031	Enterococcus sRNA 64
Ref68	RF02840	NC_004668.1	cm	1	124	788994	789132	+	no	0.45	intergenic	NA	NA	yes	sRNA_040	Enterococcus Lacto-3 RNA
Ref66	RF02839	NC_004668.1	cm	1	118	2961839	2961949	+	no	0.42	intergenic	NA	NA	-	-	Enterococcus sRNA 66
RefA5	RF02843	NC_004668.1	cm	1	68	450520	450453	-	no	0.41	antisense	NA	EF0485	-	-	Enterococcus sRNA A5
RefA5	RF02843	NC_004668.1	cm	1	68	146764	146697	-	no	0.46	antisense	NA	EF0149	-	-	Enterococcus sRNA A5
Ref66	RF02839	NC_004668.1	cm	1	118	2962270	2962383	+	no	0.38	antisense	NA	EF3088	-	-	Enterococcus sRNA 66
Ref84	RF02846	NC_004668.1	cm	1	87	1876680	1876594	-	no	0.33	antisense	NA	EF1935	-	sRNA_081	Enterococcus sRNA 84
Ref55	RF02838	NC_004668.1	cm	1	54	294479	294426	-	no	0.39	antisense	NA	EF0314	-	sRNA_012	Enterococcus sRNA 55
sRNA_2410	RF02863	NC_004668.1	cm	1	196	1513158	1513263	+	no	0.32	5'UTR	338	EF1561	-	-	Enterococcus sRNA 2410
RefA1	RF02842	NC_004669.1	cm	1	222	9308	9519	+	no	0.34	intergenic	NA	NA	yes	sRNA_141	Enterococcus sRNA A1
RefA5	RF02843	NC_004669.1	cm	1	68	38693	38760	+	no	0.43	antisense	NA	EFA0047	-	sRNA_147	Enterococcus sRNA A5
RefA9	RF02844	NC_004669.1	cm	1	64	63483	63420	-	no	0.39	intergenic	NA	NA	-	sRNA_153	Enterococcus sRNA A9
RefB11	RF02848	NC_004669.1	cm	1	167	63242	63418	+	no	0.44	intergenic	NA	NA	-	sRNA_152	Enterococcus sRNA B11
RefB11	RF02848	NC_004671.1	cm	1	167	55455	55622	+	no	0.44	intergenic	NA	NA	-	sRNA_159	Enterococcus sRNA B11
RefA5	RF02843	NC_004671.1	cm	1	68	10274	10207	-	no	0.44	antisense	NA	EF_B0011	-	-	Enterococcus sRNA A5
pemK	RF02913	NC_004668.1	cm	1	68	449389	449445	+	no	0.44	intergenic	NA	NA	-	-	not expressed
pemK	RF02913	NC_004668.1	cm	1	68	1794735	1794679	-	no	0.44	intergenic	NA	NA	-	-	not expressed
pemK	RF02913	NC_004668.1	cm	1	68	2165298	2165237	-	no	0.4	intergenic	NA	NA	-	-	not expressed
pemK	RF02913	NC_004668.1	cm	1	68	447341	447285	-	no	0.4	intergenic	NA	NA	-	-	not expressed
housekeeping RNAs
RNaseP_bact_b	RF00011	NC_004668.1	cm	1	366	1121959	1122327	+	no	0.46	intergenic	NA	NA	yes	-
tmRNA	RF00023	NC_004668.1	cm	1	354	1067257	1066891	-	no	0.46	intergenic	NA	NA	yes	sRNA_054
6S	RF00013	NC_004668.1	cm	1	188	1917734	1917927	+	no	0.43	5'UTR		EF1980	yes	sRNA_084
23S-methyl	RF01065	NC_004668.1	cm	1	102	2578241	2578137	-	no	0.42	intergenic	NA	NA	yes	sRNA_111
Bacteria_small_SRP	RF00169	NC_004668.1	cm	1	97	2119375	2119291	-	no	0.52	intergenic	NA	NA	yes	sRNA_094
introns
group-II-D1D4-5	RF02004	NC_004668.1	cm	1	200	2252414	2252203	-	no	0.53	intergenic	NA	NA	-	-	catalytic intron, not expressed
group-II-D1D4-6	RF02004	NC_004668.1	cm	1	200	1836423	1836242	-	no	0.42	intergenic	NA	NA	-	-	catalytic intron, not expressed
Intron_gpII	RF00029	NC_004668.1	cm	1	93	2249796	2249712	-	no	0.54	interCDS	NA	EF2325	-	-	catalytic intron, not expressed
Intron_gpII	RF00029	NC_004668.1	cm	1	93	1833977	1833893	-	no	0.46	interCDS	NA	NA	-	-	catalytic intron, not expressed
terminators
ctRNA_pT181	RF00242	NC_004670.1	cm	1	94	3301	3217	-	no	0.33	interCDS	NA	NA	-	-	terminator, not expressed

## Sheet: E. faecium AUS0004
Table S4. Rfam predictions for E. faecium AUS0004
list does not include tRNA and rRNA predictions
The predicted Rho-independed terminators (RIT) and sRNA column refers to terminators and sRNAs predicted in this study
Expression in comment column refers to conditions used in this study
target name	accession	query name	mdl	mdl from	mdl to	seq from	seq to	strand	trunc	gc	position	UTR length	associated gene	predicted RIT (this study)	predicted sRNA (this study)	comment
riboswitches
Fluoride	RF01734	NC_017022.1	cm	1	63	1962471	1962405	-	no	0.39	5'UTR	123	EFAU004_RS09705	yes	sRNA_085
FMN	RF00050	NC_017022.1	cm	1	140	1246484	1246359	-	no	0.44	5'UTR	268	EFAU004_RS06035	-	-	already in annotation
glmS	RF00234	NC_017022.1	cm	1	171	1688807	1688954	+	no	0.45	5'UTR	227	EFAU004_RS08400	-	-
Lysine	RF00168	NC_017022.1	cm	1	183	186939	186765	-	no	0.47	5'UTR	113	EFAU004_RS14900	-	-
PreQ1	RF00522	NC_017022.1	cm	1	45	2095020	2095064	+	no	0.38	5'UTR	92	EFAU004_RS10370	-	-	already in annotation
PreQ1	RF00522	NC_017022.1	cm	1	45	2477921	2477875	-	no	0.43	5'UTR	68	EFAU004_RS12330	-	-	already in annotation
Purine	RF00167	NC_017022.1	cm	1	102	1149097	1149000	-	no	0.32	5'UTR	203	EFAU004_RS05545	yes	-	already in annotation
SMK_box_riboswitch	RF01767	NC_017022.1	cm	1	84	2645599	2645520	-	no	0.46	5'UTR	73	EFAU004_RS13000	-	-
THF	RF01831	NC_017022.1	cm	1	100	2298082	2297984	-	no	0.43	5'UTR	157	EFAU004_RS11375	-	-
TPP	RF00059	NC_017022.1	cm	1	105	1181226	1181122	-	no	0.45	5'UTR	187	EFAU004_RS05720	yes	-	already in annotation
TPP	RF00059	NC_017022.1	cm	1	105	2693516	2693414	-	no	0.43	5'UTR	168	EFAU004_RS13215	-	-	already in annotation
ykoK	RF00380	NC_017022.1	cm	1	169	642749	642923	+	no	0.41	5'UTR	495	EFAU004_RS03055	-	sRNA_025
ykoK	RF00380	NC_017022.1	cm	1	169	875019	875185	+	no	0.41	5'UTR	306	EFAU004_RS04280	yes	sRNA_038
DUF1646	RF03071	NC_017022.1	cm	1	55	2127299	2127252	-	no	0.5	5'UTR	162	EFAU004_RS10530	-	-	DUF1646 RNA
T-boxes
T-box	RF00230	NC_017022.1	cm	1	224	404397	404602	+	no	0.44	5'UTR	328	EFAU004_RS01985	-	sRNA_016
T-box	RF00230	NC_017022.1	cm	1	224	577462	577718	+	no	0.45	5'UTR	334	EFAU004_RS02765	yes	sRNA_022
T-box	RF00230	NC_017022.1	cm	1	224	2230363	2230147	-	no	0.41	5'UTR	261	EFAU004_RS11045	-	sRNA_095
T-box	RF00230	NC_017022.1	cm	1	224	2328241	2327896	-	no	0.45	5'UTR	400	EFAU004_RS11505	-	sRNA_100
T-box	RF00230	NC_017022.1	cm	1	224	2632681	2632475	-	no	0.47	5'UTR	367	EFAU004_RS12950	yes	sRNA_110
T-box	RF00230	NC_017022.1	cm	1	224	2720711	2720472	-	no	0.42	3'UTR	260	EFAU004_RS13345	yes	-
T-box	RF00230	NC_017022.1	cm	1	224	646748	646981	+	no	0.43	5'UTR	582	EFAU004_RS03065	yes	sRNA_026	stacking type
T-box	RF00230	NC_017022.1	cm	1	224	647024	647262	+	no	0.45	5'UTR	582	EFAU004_RS03065	-	-	stacking type
T-box	RF00230	NC_017022.1	cm	1	224	720769	720996	+	no	0.39	5'UTR	294	EFAU004_RS03410	-	-
ribosomal protein elements
L10_leader	RF00557	NC_017022.1	cm	1	139	2470068	2469941	-	no	0.38	5'UTR	332	EFAU004_RS12275	-	-
L17DE	RF01708	NC_017022.1	cm	1	76	111481	111554	+	no	0.47	3'UTR	191	EFAU004_RS00600	yes	-
L19_leader	RF00556	NC_017022.1	cm	1	42	1895046	1895008	-	no	0.36	5'UTR	83	EFAU004_RS09370	-	-
L20_leader	RF00558	NC_017022.1	cm	1	127	263827	263952	+	no	0.43	5'UTR	175	EFAU004_RS01300	-	-
L21_leader	RF00559	NC_017022.1	cm	1	78	773363	773439	+	no	0.45	5'UTR	112	EFAU004_RS03665	-	-
thermoregulators
cspA	RF01766	NC_017022.1	cm	1	428	1512001	1511596	-	no	0.33	interCDS	120	EFAU004_RS07485	yes	-
cspA	RF01766	NC_017022.1	cm	1	428	1955696	1955309	-	no	0.37	interCDS	111	EFAU004_RS09675	yes	-
other cis-regulatory elements
Lacto-rpoB	RF01709	NC_017022.1	cm	1	58	2907712	2907654	-	no	0.34	5'UTR	239	EFAU004_RS14205	-	-
PyrR	RF00515	NC_017022.1	cm	1	126	992446	992284	-	no	0.42	5'UTR	209	EFAU004_RS04800	-	sRNA_043
predicted sRNAs
sRNA_1300	RF02862	NC_017022.1	cm	1	231	1613386	1613157	-	no	0.32	intergenic	NA	NA	yes	sRNA_069	Enterococcus sRNA 1300
sRNA_0030	RF02864	NC_017022.1	cm	1	165	65197	65361	+	no	0.33	5'UTR	140	EFAU004_RS14865	-	sRNA_002	Enterococcus sRNA 30
sRNA_2410	RF02863	NC_017022.1	cm	1	196	2907958	2908152	+	no	0.33	5'UTR	333	EFAU004_RS1420	-	sRNA_116	Enterococcus sRNA 2410
sRNA_2410	RF02863	NC_017022.1	cm	1	196	1598674	1598500	-	no	0.35	antisense	NA	EFAU004_RS15385	-	sRNA_068	Enterococcus sRNA 2410
RAGATH-35	RF03056	NC_017022.1	cm	1	87	1984779	1984695	-	no	0.34	intergenic	NA	NA	-	-	RAGATH-35 RNA
Ref84	RF02846	NC_017022.1	cm	1	87	2372091	2372010	-	no	0.39	intergenic	NA	NA	yes	sRNA_101	Enterococcus sRNA 84
rli38	RF01470	NC_017022.1	cm	1	150	44339	44198	-	no	0.31	intergenic	NA	NA	yes	-	Listeria sRNA rli38, not expressed
BsrC	RF01410	NC_017022.1	cm	1	87	1532710	1532622	-	no	0.3	intergenic	NA	NA	yes	sRNA_067	BsrC
rliD	RF01494	NC_017022.1	cm	1	327	191452	191201	-	no	0.43	antisense	NA	EFAU004_RS00980	-	-	Listeria sRNA rliD
Bacillus-plasmid	RF01691	NC_017023.1	cm	1	61	3270	3329	+	no	0.57	intergenic	NA	NA	-	-	Bacillus-plasmid RNA
Bacillus-plasmid	RF01691	NC_017024.1	cm	1	61	3687	3746	+	no	0.57	intergenic	NA	NA	-	-	Bacillus-plasmid RNA
SpF66_sRNA	RF02442	NC_017032.1 -	cm	1	239	42028	41811	-	no	0.4	intergenic	NA	NA	-	sRNA_128
pemK	RF02913	NC_017022.1	cm	1	68	2837252	2837155	-	no	0.58	antisense	NA	EFAU004_RS15885	-	-
pemK	RF02913	NC_017022.1	cm	1	68	72772	72869	+	no	0.47	antisense	NA	EFAU004_RS14875	-	-
pemK	RF02913	NC_017022.1	cm	1	68	1844859	1844798	-	no	0.48	intergenic	NA	NA	-	-	not expressed
pemK	RF02913	NC_017022.1	cm	1	68	2879775	2879830	+	no	0.45	intergenic	NA	NA	-	-	not expressed
housekeeping RNAs
RNaseP_bact_b	RF00011	NC_017022.1	cm	1	366	1015381	1015014	-	no	0.49	interCDS	NA	rnpB	-	-	already in annotation
tmRNA	RF00023	NC_017022.1	cm	1	354	1820183	1820549	+	no	0.45	interCDS	NA	ssrA	yes	-	already in annotation
23S-methyl	RF01065	NC_017022.1	cm	1	102	2489021	2488917	-	no	0.38	5'UTR	175	EFAU004_RS12380	yes	sRNA_106	23S methyl RNA motif
6S	RF00013	NC_017022.1	cm	1	188	2529627	2529821	+	no	0.45	interCDS	NA	ssrS	yes	-	already in annotation
Bacteria_small_SRP	RF00169	NC_017022.1	cm	1	97	2261189	2261105	-	no	0.52	interCDS	NA	ffs	yes	-	already in annotation
introns
Intron_gpII	RF00029	NC_017022.1	cm	1	93	1873788	1873704	-	no	0.44	interCDS	NA	EFAU004_RS09285	-	-	catalytic intron, not expressed
Intron_gpII	RF00029	NC_017022.1	cm	1	93	1881959	1881869	-	no	0.45	interCDS	NA	EFAU004_RS15465	-	-	catalytic intron, not expressed
Intron_gpII	RF00029	NC_017022.1	cm	1	93	2799259	2799349	+	no	0.45	interCDS	NA	EFAU004_RS15845	-	-	catalytic intron, not expressed
group-II-D1D4-5	RF02004	NC_017022.1	cm	1	200	1876315	1876118	-	no	0.47	intergenic	NA	NA	-	-	catalytic intron, not expressed
group-II-D1D4-5	RF02004	NC_017022.1	cm	1	200	1884561	1884353	-	no	0.44	intergenic	NA	NA	-	-	catalytic intron, not expressed
group-II-D1D4-5	RF02004	NC_017022.1	cm	1	200	2796657	2796865	+	no	0.44	intergenic	NA	NA	-	-	catalytic intron, not expressed
crispr RNA
tracrRNA	RF02348	NC_017022.1	cm	1	91	331085	330995	-	no	0.4	antisense	NA	EFAU004_RS01655	-	-	Trans-activating crRNA
