# Supplementary material for: Single-Nucleotide RNA Maps for the Two Major Nosocomial Pathogens Enterococcus faecalis and Enterococcus faecium
Source: Front Cell Infect Microbiol. 2020 Nov 25;10:600325. doi: 10.3389/fcimb.2020.600325 (PMC7724050; doi:10.3389/fcimb.2020.600325)
Supplement: Supplementary Table 5 — 3′UTRs detected for expressed mRNAs. [file Table_5.xlsx]

## Sheet: E. faecium AUS0004 no RIT
Table S5. 3'UTRs detected for expressed mRNAs - E. faecium
This table lists all 3'UTRs in E. faecium AUS0004 that do not have a predicted Rho-independent terminator
Genome accession number	Feature	Strand	TSS(-strand)/CDS(+strand)	Additional info	UTR length
NC_017022.1	3UTR	+	352948	ID=NC_017022.1_utr3_51;Name=3'UTR_00051;associated_term=NA;associated_gene=EFAU004_RS01750;associated_cds=WP_002287538.1;length=1;Parent=NC_017022.1_transcript367	1
NC_017022.1	3UTR	-	1962519	ID=NC_017022.1_utr3_222;Name=3'UTR_00222;associated_term=NA;associated_gene=EFAU004_RS09710;associated_cds=WP_002296301.1;length=1;Parent=NC_017022.1_transcript1666	1
NC_017022.1	3UTR	-	1169173	ID=NC_017022.1_utr3_144;Name=3'UTR_00144;associated_term=NA;associated_gene=EFAU004_RS05650;associated_cds=WP_002297129.1;length=2;Parent=NC_017022.1_transcript1047	2
NC_017022.1	3UTR	+	193404	ID=NC_017022.1_utr3_28;Name=3'UTR_00028;associated_term=NA;associated_gene=EFAU004_RS00980;associated_cds=WP_002297086.1;length=3;Parent=NC_017022.1_transcript181	3
NC_017023.1	3UTR	+	1634	ID=NC_017023.1_utr3_342;Name=3'UTR_00342;associated_term=NA;associated_gene=EFAU004_RS14780;associated_cds=WP_002318183.1;length=3;Parent=NC_017023.1_transcript2488	3
NC_017022.1	3UTR	+	612891	ID=NC_017022.1_utr3_77;Name=3'UTR_00077;associated_term=NA;associated_gene=EFAU004_RS02905;associated_cds=WP_002288548.1;length=4;Parent=NC_017022.1_transcript576	4
NC_017022.1	3UTR	-	2217772	ID=NC_017022.1_utr3_255;Name=3'UTR_00255;associated_term=NA;associated_gene=EFAU004_RS11000;associated_cds=WP_002296291.1;length=4;Parent=NC_017022.1_transcript1872	4
NC_017022.1	3UTR	-	2485035	ID=NC_017022.1_utr3_285;Name=3'UTR_00285;associated_term=NA;associated_gene=EFAU004_RS12370;associated_cds=WP_002289594.1;length=4;Parent=NC_017022.1_transcript2119	4
NC_017022.1	3UTR	-	2518226	ID=NC_017022.1_utr3_292;Name=3'UTR_00292;associated_term=NA;associated_gene=EFAU004_RS12505;associated_cds=WP_002289103.1;length=4;Parent=NC_017022.1_transcript2146	4
NC_017022.1	3UTR	-	1347862	ID=NC_017022.1_utr3_165;Name=3'UTR_00165;associated_term=NA;associated_gene=EFAU004_RS06550;associated_cds=WP_002287651.1;length=5;Parent=NC_017022.1_transcript1197	5
NC_017022.1	3UTR	-	1571238	ID=NC_017022.1_utr3_187;Name=3'UTR_00187;associated_term=NA;associated_gene=EFAU004_RS07795;associated_cds=WP_002296401.1;length=5;Parent=NC_017022.1_transcript1382	5
NC_017022.1	3UTR	-	1264877	ID=NC_017022.1_utr3_162;Name=3'UTR_00162;associated_term=NA;associated_gene=EFAU004_RS06115;associated_cds=WP_002289463.1;length=6;Parent=NC_017022.1_transcript1133	6
NC_017022.1	3UTR	+	2333797	ID=NC_017022.1_utr3_271;Name=3'UTR_00271;associated_term=NA;associated_gene=EFAU004_RS11530;associated_cds=WP_002303626.1;length=6;Parent=NC_017022.1_transcript1976	6
NC_017022.1	3UTR	-	2756944	ID=NC_017022.1_utr3_324;Name=3'UTR_00324;associated_term=NA;associated_gene=EFAU004_RS13515;associated_cds=WP_002287495.1;length=6;Parent=NC_017022.1_transcript2324	6
NC_017022.1	3UTR	+	656681	ID=NC_017022.1_utr3_81;Name=3'UTR_00081;associated_term=NA;associated_gene=EFAU004_RS03100;associated_cds=WP_002290034.1;length=7;Parent=NC_017022.1_transcript619	7
NC_017022.1	3UTR	-	1143664	ID=NC_017022.1_utr3_142;Name=3'UTR_00142;associated_term=NA;associated_gene=EFAU004_RS05525;associated_cds=WP_002288023.1;length=8;Parent=NC_017022.1_transcript1034	8
NC_017022.1	3UTR	-	1956015	ID=NC_017022.1_utr3_220;Name=3'UTR_00220;associated_term=NA;associated_gene=EFAU004_RS09680;associated_cds=WP_002296295.1;length=8;Parent=NC_017022.1_transcript1660	8
NC_017022.1	3UTR	-	2001050	ID=NC_017022.1_utr3_225;Name=3'UTR_00225;associated_term=NA;associated_gene=EFAU004_RS09895;associated_cds=WP_002296215.1;length=8;Parent=NC_017022.1_transcript1698	8
NC_017022.1	3UTR	-	1610364	ID=NC_017022.1_utr3_191;Name=3'UTR_00191;associated_term=NA;associated_gene=EFAU004_RS07995;associated_cds=WP_014387028.1;length=9;Parent=NC_017022.1_transcript1409	9
NC_017022.1	3UTR	-	2476151	ID=NC_017022.1_utr3_284;Name=3'UTR_00284;associated_term=NA;associated_gene=EFAU004_RS12315;associated_cds=WP_002294579.1;length=9;Parent=NC_017022.1_transcript2108	9
NC_017022.1	3UTR	-	2763038	ID=NC_017022.1_utr3_325;Name=3'UTR_00325;associated_term=NA;associated_gene=EFAU004_RS13545;associated_cds=WP_002321568.1;length=9;Parent=NC_017022.1_transcript2333	9
NC_017022.1	3UTR	-	1194938	ID=NC_017022.1_utr3_150;Name=3'UTR_00150;associated_term=NA;associated_gene=EFAU004_RS05800;associated_cds=WP_002289265.1;length=10;Parent=NC_017022.1_transcript1078	10
NC_017022.1	3UTR	-	2025438	ID=NC_017022.1_utr3_228;Name=3'UTR_00228;associated_term=NA;associated_gene=EFAU004_RS10025;associated_cds=WP_002296152.1;length=10;Parent=NC_017022.1_transcript1721	10
NC_017022.1	3UTR	+	2732632	ID=NC_017022.1_utr3_319;Name=3'UTR_00319;associated_term=NA;associated_gene=EFAU004_RS13395;associated_cds=WP_002287456.1;length=11;Parent=NC_017022.1_transcript2296	11
NC_017022.1	3UTR	+	313368	ID=NC_017022.1_utr3_49;Name=3'UTR_00049;associated_term=NA;associated_gene=EFAU004_RS01565;associated_cds=WP_080019245.1;length=12;Parent=NC_017022.1_transcript334	12
NC_017022.1	3UTR	+	439868	ID=NC_017022.1_utr3_59;Name=3'UTR_00059;associated_term=NA;associated_gene=EFAU004_RS02130;associated_cds=WP_002286313.1;length=12;Parent=NC_017022.1_transcript439	12
NC_017022.1	3UTR	-	838309	ID=NC_017022.1_utr3_101;Name=3'UTR_00101;associated_term=NA;associated_gene=EFAU004_RS04065;associated_cds=WP_002300143.1;length=12;Parent=NC_017022.1_transcript777	12
NC_017022.1	3UTR	-	1395928	ID=NC_017022.1_utr3_174;Name=3'UTR_00174;associated_term=NA;associated_gene=EFAU004_RS06790;associated_cds=WP_002292862.1;length=12;Parent=NC_017022.1_transcript1233	12
NC_017022.1	3UTR	+	1480487	ID=NC_017022.1_utr3_180;Name=3'UTR_00180;associated_term=NA;associated_gene=EFAU004_RS07225;associated_cds=WP_002300143.1;length=12;Parent=NC_017022.1_transcript1294	12
NC_017022.1	3UTR	-	1559982	ID=NC_017022.1_utr3_184;Name=3'UTR_00184;associated_term=NA;associated_gene=EFAU004_RS07740;associated_cds=WP_002288333.1;length=14;Parent=NC_017022.1_transcript1376	14
NC_017022.1	3UTR	-	2259510	ID=NC_017022.1_utr3_263;Name=3'UTR_00263;associated_term=NA;associated_gene=EFAU004_RS11205;associated_cds=WP_002287155.1;length=14;Parent=NC_017022.1_transcript1912	14
NC_017022.1	3UTR	+	2496027	ID=NC_017022.1_utr3_287;Name=3'UTR_00287;associated_term=NA;associated_gene=EFAU004_RS12420;associated_cds=WP_002289850.1;length=14;Parent=NC_017022.1_transcript2128	14
NC_017022.1	3UTR	-	883996	ID=NC_017022.1_utr3_106;Name=3'UTR_00106;associated_term=NA;associated_gene=EFAU004_RS04320;associated_cds=WP_002288180.1;length=15;Parent=NC_017022.1_transcript827	15
NC_017022.1	3UTR	+	2334361	ID=NC_017022.1_utr3_272;Name=3'UTR_00272;associated_term=NA;associated_gene=EFAU004_RS11540;associated_cds=WP_002294094.1;length=16;Parent=NC_017022.1_transcript1978	16
NC_017022.1	3UTR	-	2750239	ID=NC_017022.1_utr3_321;Name=3'UTR_00321;associated_term=NA;associated_gene=EFAU004_RS13480;associated_cds=WP_002301008.1;length=16;Parent=NC_017022.1_transcript2315	16
NC_017022.1	3UTR	-	1077987	ID=NC_017022.1_utr3_136;Name=3'UTR_00136;associated_term=NA;associated_gene=EFAU004_RS05215;associated_cds=WP_002292935.1;length=17;Parent=NC_017022.1_transcript990	17
NC_017022.1	3UTR	-	2606300	ID=NC_017022.1_utr3_300;Name=3'UTR_00300;associated_term=NA;associated_gene=EFAU004_RS12865;associated_cds=WP_002285966.1;length=18;Parent=NC_017022.1_transcript2203	18
NC_017022.1	3UTR	+	2846856	ID=NC_017022.1_utr3_330;Name=3'UTR_00330;associated_term=NA;associated_gene=EFAU004_RS13960;associated_cds=WP_002317277.1;length=19;Parent=NC_017022.1_transcript2417	19
NC_017022.1	3UTR	+	14986	ID=NC_017022.1_utr3_2;Name=3'UTR_00002;associated_term=NA;associated_gene=EFAU004_RS00075;associated_cds=WP_002288372.1;length=21;Parent=NC_017022.1_transcript16	21
NC_017022.1	3UTR	-	697665	ID=NC_017022.1_utr3_88;Name=3'UTR_00088;associated_term=NA;associated_gene=EFAU004_RS03300;associated_cds=WP_002287046.1;length=21;Parent=NC_017022.1_transcript668	21
NC_017022.1	3UTR	-	1609617	ID=NC_017022.1_utr3_190;Name=3'UTR_00190;associated_term=NA;associated_gene=EFAU004_RS07990;associated_cds=WP_014387027.1;length=21;Parent=NC_017022.1_transcript1407	21
NC_017022.1	3UTR	-	2077908	ID=NC_017022.1_utr3_238;Name=3'UTR_00238;associated_term=NA;associated_gene=EFAU004_RS10265;associated_cds=WP_002296583.1;length=21;Parent=NC_017022.1_transcript1760	21
NC_017022.1	3UTR	-	2688559	ID=NC_017022.1_utr3_308;Name=3'UTR_00308;associated_term=NA;associated_gene=EFAU004_RS13190;associated_cds=WP_002287356.1;length=22;Parent=NC_017022.1_transcript2266	22
NC_017022.1	3UTR	-	1234133	ID=NC_017022.1_utr3_156;Name=3'UTR_00156;associated_term=NA;associated_gene=EFAU004_RS05985;associated_cds=WP_002296982.1;length=24;Parent=NC_017022.1_transcript1111	24
NC_017022.1	3UTR	+	2433628	ID=NC_017022.1_utr3_280;Name=3'UTR_00280;associated_term=NA;associated_gene=EFAU004_RS12095;associated_cds=WP_002286584.1;length=25;Parent=NC_017022.1_transcript2060	25
NC_017022.1	3UTR	+	591111	ID=NC_017022.1_utr3_75;Name=3'UTR_00075;associated_term=NA;associated_gene=EFAU004_RS02830;associated_cds=WP_002298398.1;length=26;Parent=NC_017022.1_transcript550	26
NC_017022.1	3UTR	-	2489075	ID=NC_017022.1_utr3_286;Name=3'UTR_00286;associated_term=NA;associated_gene=EFAU004_RS12385;associated_cds=WP_002294559.1;length=26;Parent=NC_017022.1_transcript2124	26
NC_017022.1	3UTR	-	1862573	ID=NC_017022.1_utr3_211;Name=3'UTR_00211;associated_term=NA;associated_gene=EFAU004_RS09245;associated_cds=WP_002305710.1;length=28;Parent=NC_017022.1_transcript1582	28
NC_017022.1	3UTR	-	25925	ID=NC_017022.1_utr3_5;Name=3'UTR_00005;associated_term=NA;associated_gene=EFAU004_RS00120;associated_cds=WP_002288384.1;length=29;Parent=NC_017022.1_transcript32	29
NC_017022.1	3UTR	+	937596	ID=NC_017022.1_utr3_113;Name=3'UTR_00113;associated_term=NA;associated_gene=EFAU004_RS04565;associated_cds=WP_002286065.1;length=29;Parent=NC_017022.1_transcript883	29
NC_017022.1	3UTR	-	2925505	ID=NC_017022.1_utr3_336;Name=3'UTR_00336;associated_term=NA;associated_gene=EFAU004_RS14280;associated_cds=WP_021415055.1;length=29;Parent=NC_017022.1_transcript2467	29
NC_017022.1	3UTR	-	1235625	ID=NC_017022.1_utr3_157;Name=3'UTR_00157;associated_term=NA;associated_gene=EFAU004_RS05990;associated_cds=WP_002294406.1;length=31;Parent=NC_017022.1_transcript1113	31
NC_017022.1	3UTR	+	2941193	ID=NC_017022.1_utr3_338;Name=3'UTR_00338;associated_term=NA;associated_gene=EFAU004_RS14370;associated_cds=WP_002295265.1;length=31;Parent=NC_017022.1_transcript2473	31
NC_017022.1	3UTR	-	634268	ID=NC_017022.1_utr3_78;Name=3'UTR_00078;associated_term=NA;associated_gene=EFAU004_RS03020;associated_cds=WP_002296191.1;length=32;Parent=NC_017022.1_transcript601	32
NC_017022.1	3UTR	+	1241124	ID=NC_017022.1_utr3_158;Name=3'UTR_00158;associated_term=NA;associated_gene=EFAU004_RS06015;associated_cds=WP_002294401.1;length=32;Parent=NC_017022.1_transcript1114	32
NC_017022.1	3UTR	-	1591276	ID=NC_017022.1_utr3_189;Name=3'UTR_00189;associated_term=NA;associated_gene=EFAU004_RS07900;associated_cds=WP_002289137.1;length=32;Parent=NC_017022.1_transcript1398	32
NC_017022.1	3UTR	-	1216618	ID=NC_017022.1_utr3_152;Name=3'UTR_00152;associated_term=NA;associated_gene=EFAU004_RS05890;associated_cds=WP_002288398.1;length=33;Parent=NC_017022.1_transcript1093	33
NC_017022.1	3UTR	-	1565534	ID=NC_017022.1_utr3_185;Name=3'UTR_00185;associated_term=NA;associated_gene=EFAU004_RS07775;associated_cds=WP_002296395.1;length=34;Parent=NC_017022.1_transcript1378	34
NC_017022.1	3UTR	-	2244762	ID=NC_017022.1_utr3_260;Name=3'UTR_00260;associated_term=NA;associated_gene=EFAU004_RS11125;associated_cds=WP_002287966.1;length=35;Parent=NC_017022.1_transcript1899	35
NC_017022.1	3UTR	+	189788	ID=NC_017022.1_utr3_26;Name=3'UTR_00026;associated_term=NA;associated_gene=EFAU004_RS00965;associated_cds=WP_002294232.1;length=37;Parent=NC_017022.1_transcript174	37
NC_017022.1	3UTR	-	1761846	ID=NC_017022.1_utr3_201;Name=3'UTR_00201;associated_term=NA;associated_gene=EFAU004_RS08710;associated_cds=WP_002288434.1;length=39;Parent=NC_017022.1_transcript1485	39
NC_017022.1	3UTR	-	1177837	ID=NC_017022.1_utr3_146;Name=3'UTR_00146;associated_term=NA;associated_gene=EFAU004_RS05705;associated_cds=WP_002297012.1;length=41;Parent=NC_017022.1_transcript1062	41
NC_017022.1	3UTR	-	1403231	ID=NC_017022.1_utr3_175;Name=3'UTR_00175;associated_term=NA;associated_gene=EFAU004_RS06835;associated_cds=WP_002289156.1;length=41;Parent=NC_017022.1_transcript1240	41
NC_017022.1	3UTR	-	2298269	ID=NC_017022.1_utr3_269;Name=3'UTR_00269;associated_term=NA;associated_gene=EFAU004_RS11380;associated_cds=WP_002289508.1;length=41;Parent=NC_017022.1_transcript1944	41
NC_017022.1	3UTR	+	2529598	ID=NC_017022.1_utr3_294;Name=3'UTR_00294;associated_term=NA;associated_gene=EFAU004_RS12550;associated_cds=WP_002289088.1;length=43;Parent=NC_017022.1_transcript2154	43
NC_017022.1	3UTR	-	2715648	ID=NC_017022.1_utr3_316;Name=3'UTR_00316;associated_term=NA;associated_gene=EFAU004_RS13310;associated_cds=WP_002287434.1;length=44;Parent=NC_017022.1_transcript2285	44
NC_017022.1	3UTR	-	1665728	ID=NC_017022.1_utr3_195;Name=3'UTR_00195;associated_term=NA;associated_gene=EFAU004_RS08300;associated_cds=WP_002288471.1;length=45;Parent=NC_017022.1_transcript1428	45
NC_017022.1	3UTR	-	1227120	ID=NC_017022.1_utr3_154;Name=3'UTR_00154;associated_term=NA;associated_gene=EFAU004_RS05945;associated_cds=WP_002290187.1;length=47;Parent=NC_017022.1_transcript1104	47
NC_017022.1	3UTR	-	2468813	ID=NC_017022.1_utr3_283;Name=3'UTR_00283;associated_term=NA;associated_gene=EFAU004_RS12270;associated_cds=WP_002294588.1;length=48;Parent=NC_017022.1_transcript2101	48
NC_017022.1	3UTR	-	1708952	ID=NC_017022.1_utr3_198;Name=3'UTR_00198;associated_term=NA;associated_gene=EFAU004_RS08490;associated_cds=WP_002296517.1;length=51;Parent=NC_017022.1_transcript1453	51
NC_017022.1	3UTR	-	1783841	ID=NC_017022.1_utr3_204;Name=3'UTR_00204;associated_term=NA;associated_gene=EFAU004_RS08830;associated_cds=WP_002296119.1;length=51;Parent=NC_017022.1_transcript1503	51
NC_017022.1	3UTR	-	74484	ID=NC_017022.1_utr3_8;Name=3'UTR_00008;associated_term=NA;associated_gene=EFAU004_RS00355;associated_cds=WP_002298578.1;length=53;Parent=NC_017022.1_transcript89	53
NC_017022.1	3UTR	-	429451	ID=NC_017022.1_utr3_58;Name=3'UTR_00058;associated_term=NA;associated_gene=EFAU004_RS02080;associated_cds=WP_002286333.1;length=53;Parent=NC_017022.1_transcript425	53
NC_017022.1	3UTR	+	692962	ID=NC_017022.1_utr3_86;Name=3'UTR_00086;associated_term=NA;associated_gene=EFAU004_RS03275;associated_cds=WP_002287055.1;length=53;Parent=NC_017022.1_transcript662	53
NC_017022.1	3UTR	+	196366	ID=NC_017022.1_utr3_29;Name=3'UTR_00029;associated_term=NA;associated_gene=EFAU004_RS00990;associated_cds=WP_002289279.1;length=54;Parent=NC_017022.1_transcript185	54
NC_017022.1	3UTR	+	905093	ID=NC_017022.1_utr3_109;Name=3'UTR_00109;associated_term=NA;associated_gene=EFAU004_RS04410;associated_cds=WP_002295921.1;length=54;Parent=NC_017022.1_transcript849	54
NC_017022.1	3UTR	-	1955363	ID=NC_017022.1_utr3_219;Name=3'UTR_00219;associated_term=NA;associated_gene=EFAU004_RS09675;associated_cds=WP_002288762.1;length=54;Parent=NC_017022.1_transcript1658	54
NC_017022.1	3UTR	+	2190071	ID=NC_017022.1_utr3_252;Name=3'UTR_00252;associated_term=NA;associated_gene=EFAU004_RS10870;associated_cds=WP_002289868.1;length=55;Parent=NC_017022.1_transcript1840	55
NC_017024.1	3UTR	+	3732	ID=NC_017024.1_utr3_345;Name=3'UTR_00345;associated_term=NA;associated_gene=EFAU004_RS14810;associated_cds=WP_044031643.1;length=55;Parent=NC_017024.1_transcript2504	55
NC_017022.1	3UTR	+	2394937	ID=NC_017022.1_utr3_277;Name=3'UTR_00277;associated_term=NA;associated_gene=EFAU004_RS11825;associated_cds=WP_002311479.1;length=56;Parent=NC_017022.1_transcript2018	56
NC_017022.1	3UTR	-	2736709	ID=NC_017022.1_utr3_320;Name=3'UTR_00320;associated_term=NA;associated_gene=EFAU004_RS13420;associated_cds=WP_002287463.1;length=57;Parent=NC_017022.1_transcript2301	57
NC_017022.1	3UTR	-	2542496	ID=NC_017022.1_utr3_296;Name=3'UTR_00296;associated_term=NA;associated_gene=EFAU004_RS12625;associated_cds=WP_002297575.1;length=58;Parent=NC_017022.1_transcript2166	58
NC_017022.1	3UTR	-	2516442	ID=NC_017022.1_utr3_291;Name=3'UTR_00291;associated_term=NA;associated_gene=EFAU004_RS12500;associated_cds=WP_002289105.1;length=61;Parent=NC_017022.1_transcript2145	61
NC_017022.1	3UTR	-	1979668	ID=NC_017022.1_utr3_224;Name=3'UTR_00224;associated_term=NA;associated_gene=EFAU004_RS15525;associated_cds=WP_077974463.1;length=62;Parent=NC_017022.1_transcript1675	62
NC_017022.1	3UTR	+	362888	ID=NC_017022.1_utr3_53;Name=3'UTR_00053;associated_term=NA;associated_gene=EFAU004_RS01810;associated_cds=WP_002294687.1;length=63;Parent=NC_017022.1_transcript375	63
NC_017022.1	3UTR	-	1793035	ID=NC_017022.1_utr3_206;Name=3'UTR_00206;associated_term=NA;associated_gene=EFAU004_RS08875;associated_cds=WP_002296332.1;length=63;Parent=NC_017022.1_transcript1515	63
NC_017022.1	3UTR	-	2072105	ID=NC_017022.1_utr3_236;Name=3'UTR_00236;associated_term=NA;associated_gene=EFAU004_RS10215;associated_cds=WP_002296587.1;length=63;Parent=NC_017022.1_transcript1748	63
NC_017032.1	3UTR	+	47289	ID=NC_017032.1_utr3_347;Name=3'UTR_00347;associated_term=NA;associated_gene=EFAU004_RS14705;associated_cds=WP_010778066.1;length=63;Parent=NC_017032.1_transcript2555	63
NC_017022.1	3UTR	-	1046985	ID=NC_017022.1_utr3_130;Name=3'UTR_00130;associated_term=NA;associated_gene=EFAU004_RS05065;associated_cds=WP_002295797.1;length=65;Parent=NC_017022.1_transcript967	65
NC_017022.1	3UTR	-	2807667	ID=NC_017022.1_utr3_327;Name=3'UTR_00327;associated_term=NA;associated_gene=EFAU004_RS13775;associated_cds=WP_002297343.1;length=65;Parent=NC_017022.1_transcript2380	65
NC_017022.1	3UTR	-	1657669	ID=NC_017022.1_utr3_194;Name=3'UTR_00194;associated_term=NA;associated_gene=EFAU004_RS08255;associated_cds=WP_009269285.1;length=66;Parent=NC_017022.1_transcript1425	66
NC_017022.1	3UTR	-	2227454	ID=NC_017022.1_utr3_257;Name=3'UTR_00257;associated_term=NA;associated_gene=EFAU004_RS11045;associated_cds=WP_002287953.1;length=69;Parent=NC_017022.1_transcript1882	69
NC_017022.1	3UTR	-	395089	ID=NC_017022.1_utr3_55;Name=3'UTR_00055;associated_term=NA;associated_gene=EFAU004_RS01935;associated_cds=WP_002289297.1;length=70;Parent=NC_017022.1_transcript394	70
NC_017022.1	3UTR	+	86800	ID=NC_017022.1_utr3_10;Name=3'UTR_00010;associated_term=NA;associated_gene=EFAU004_RS00405;associated_cds=WP_002289200.1;length=71;Parent=NC_017022.1_transcript99	71
NC_017022.1	3UTR	-	1837038	ID=NC_017022.1_utr3_209;Name=3'UTR_00209;associated_term=NA;associated_gene=EFAU004_RS09105;associated_cds=WP_002288979.1;length=72;Parent=NC_017022.1_transcript1568	72
NC_017022.1	3UTR	-	884503	ID=NC_017022.1_utr3_107;Name=3'UTR_00107;associated_term=NA;associated_gene=EFAU004_RS04325;associated_cds=WP_002296277.1;length=74;Parent=NC_017022.1_transcript828	74
NC_017022.1	3UTR	-	1098443	ID=NC_017022.1_utr3_140;Name=3'UTR_00140;associated_term=NA;associated_gene=EFAU004_RS05335;associated_cds=WP_002320838.1;length=74;Parent=NC_017022.1_transcript1016	74
NC_017022.1	3UTR	+	445441	ID=NC_017022.1_utr3_60;Name=3'UTR_00060;associated_term=NA;associated_gene=EFAU004_RS02160;associated_cds=WP_002286302.1;length=75;Parent=NC_017022.1_transcript442	75
NC_017022.1	3UTR	+	501810	ID=NC_017022.1_utr3_66;Name=3'UTR_00066;associated_term=NA;associated_gene=EFAU004_RS02400;associated_cds=WP_002286851.1;length=79;Parent=NC_017022.1_transcript483	79
NC_017022.1	3UTR	-	695945	ID=NC_017022.1_utr3_87;Name=3'UTR_00087;associated_term=NA;associated_gene=EFAU004_RS03290;associated_cds=WP_002287048.1;length=79;Parent=NC_017022.1_transcript667	79
NC_017022.1	3UTR	+	2371835	ID=NC_017022.1_utr3_276;Name=3'UTR_00276;associated_term=NA;associated_gene=EFAU004_RS11725;associated_cds=WP_002287276.1;length=79;Parent=NC_017022.1_transcript2003	79
NC_017022.1	3UTR	-	1003050	ID=NC_017022.1_utr3_122;Name=3'UTR_00122;associated_term=NA;associated_gene=EFAU004_RS04860;associated_cds=WP_008268811.1;length=81;Parent=NC_017022.1_transcript928	81
NC_017022.1	3UTR	-	1011333	ID=NC_017022.1_utr3_124;Name=3'UTR_00124;associated_term=NA;associated_gene=EFAU004_RS04900;associated_cds=WP_002289185.1;length=81;Parent=NC_017022.1_transcript935	81
NC_017022.1	3UTR	-	1275451	ID=NC_017022.1_utr3_163;Name=3'UTR_00163;associated_term=NA;associated_gene=EFAU004_RS06165;associated_cds=WP_002294372.1;length=81;Parent=NC_017022.1_transcript1143	81
NC_017022.1	3UTR	-	2710128	ID=NC_017022.1_utr3_315;Name=3'UTR_00315;associated_term=NA;associated_gene=EFAU004_RS13285;associated_cds=WP_002305538.1;length=85;Parent=NC_017022.1_transcript2282	85
NC_017022.1	3UTR	+	97025	ID=NC_017022.1_utr3_12;Name=3'UTR_00012;associated_term=NA;associated_gene=EFAU004_RS00455;associated_cds=WP_002290442.1;length=86;Parent=NC_017022.1_transcript105	86
NC_017022.1	3UTR	-	2239813	ID=NC_017022.1_utr3_259;Name=3'UTR_00259;associated_term=NA;associated_gene=EFAU004_RS11090;associated_cds=WP_002287962.1;length=89;Parent=NC_017022.1_transcript1892	89
NC_017022.1	3UTR	-	2301213	ID=NC_017022.1_utr3_270;Name=3'UTR_00270;associated_term=NA;associated_gene=EFAU004_RS11395;associated_cds=WP_002294004.1;length=89;Parent=NC_017022.1_transcript1948	89
NC_017022.1	3UTR	+	121020	ID=NC_017022.1_utr3_17;Name=3'UTR_00017;associated_term=NA;associated_gene=EFAU004_RS00640;associated_cds=WP_002289723.1;length=92;Parent=NC_017022.1_transcript113	92
NC_017022.1	3UTR	+	191179	ID=NC_017022.1_utr3_27;Name=3'UTR_00027;associated_term=NA;associated_gene=EFAU004_RS00975;associated_cds=WP_002289282.1;length=92;Parent=NC_017022.1_transcript180	92
NC_017022.1	3UTR	-	1412341	ID=NC_017022.1_utr3_176;Name=3'UTR_00176;associated_term=NA;associated_gene=EFAU004_RS06875;associated_cds=WP_014387016.1;length=94;Parent=NC_017022.1_transcript1250	94
NC_017022.1	3UTR	-	965057	ID=NC_017022.1_utr3_115;Name=3'UTR_00115;associated_term=NA;associated_gene=EFAU004_RS04675;associated_cds=WP_002289715.1;length=96;Parent=NC_017022.1_transcript899	96
NC_017022.1	3UTR	-	2833700	ID=NC_017022.1_utr3_329;Name=3'UTR_00329;associated_term=NA;associated_gene=EFAU004_RS13890;associated_cds=WP_002311664.1;length=97;Parent=NC_017022.1_transcript2407	97
NC_017022.1	3UTR	+	916647	ID=NC_017022.1_utr3_110;Name=3'UTR_00110;associated_term=NA;associated_gene=EFAU004_RS04470;associated_cds=WP_002295907.1;length=100;Parent=NC_017022.1_transcript859	100
NC_017022.1	3UTR	+	291917	ID=NC_017022.1_utr3_47;Name=3'UTR_00047;associated_term=NA;associated_gene=EFAU004_RS01445;associated_cds=WP_000389746.1;length=111;Parent=NC_017022.1_transcript287	111
NC_017022.1	3UTR	-	2343663	ID=NC_017022.1_utr3_274;Name=3'UTR_00274;associated_term=NA;associated_gene=EFAU004_RS11605;associated_cds=WP_002302142.1;length=113;Parent=NC_017022.1_transcript1987	113
NC_017022.1	3UTR	-	2117235	ID=NC_017022.1_utr3_244;Name=3'UTR_00244;associated_term=NA;associated_gene=EFAU004_RS10485;associated_cds=WP_002295106.1;length=119;Parent=NC_017022.1_transcript1784	119
NC_017022.1	3UTR	-	2196413	ID=NC_017022.1_utr3_253;Name=3'UTR_00253;associated_term=NA;associated_gene=EFAU004_RS10900;associated_cds=WP_002287744.1;length=119;Parent=NC_017022.1_transcript1847	119
NC_017022.1	3UTR	-	2753253	ID=NC_017022.1_utr3_322;Name=3'UTR_00322;associated_term=NA;associated_gene=EFAU004_RS13500;associated_cds=WP_002287490.1;length=131;Parent=NC_017022.1_transcript2320	131
NC_017022.1	3UTR	-	292306	ID=NC_017022.1_utr3_48;Name=3'UTR_00048;associated_term=NA;associated_gene=EFAU004_RS01450;associated_cds=WP_002289340.1;length=135;Parent=NC_017022.1_transcript294	135
NC_017022.1	3UTR	-	992495	ID=NC_017022.1_utr3_119;Name=3'UTR_00119;associated_term=NA;associated_gene=EFAU004_RS04805;associated_cds=WP_002295861.1;length=144;Parent=NC_017022.1_transcript921	144
NC_017022.1	3UTR	+	178733	ID=NC_017022.1_utr3_22;Name=3'UTR_00022;associated_term=NA;associated_gene=EFAU004_RS00910;associated_cds=WP_002289815.1;length=147;Parent=NC_017022.1_transcript160	147
NC_017022.1	3UTR	-	1806025	ID=NC_017022.1_utr3_207;Name=3'UTR_00207;associated_term=NA;associated_gene=EFAU004_RS08945;associated_cds=WP_002288574.1;length=152;Parent=NC_017022.1_transcript1534	152
NC_017022.1	3UTR	-	653508	ID=NC_017022.1_utr3_80;Name=3'UTR_00080;associated_term=NA;associated_gene=EFAU004_RS03090;associated_cds=WP_002296181.1;length=154;Parent=NC_017022.1_transcript616	154
NC_017022.1	3UTR	+	221776	ID=NC_017022.1_utr3_36;Name=3'UTR_00036;associated_term=NA;associated_gene=EFAU004_RS01100;associated_cds=WP_002296556.1;length=161;Parent=NC_017022.1_transcript212	161
NC_017022.1	3UTR	-	2696463	ID=NC_017022.1_utr3_310;Name=3'UTR_00310;associated_term=NA;associated_gene=EFAU004_RS13230;associated_cds=WP_002287345.1;length=161;Parent=NC_017022.1_transcript2271	161
NC_017022.1	3UTR	+	1523079	ID=NC_017022.1_utr3_183;Name=3'UTR_00183;associated_term=NA;associated_gene=EFAU004_RS07560;associated_cds=WP_002296638.1;length=164;Parent=NC_017022.1_transcript1344	164
NC_017022.1	3UTR	+	739732	ID=NC_017022.1_utr3_93;Name=3'UTR_00093;associated_term=NA;associated_gene=EFAU004_RS03495;associated_cds=WP_002290319.1;length=166;Parent=NC_017022.1_transcript705	166
NC_017022.1	3UTR	-	1767018	ID=NC_017022.1_utr3_202;Name=3'UTR_00202;associated_term=NA;associated_gene=EFAU004_RS08730;associated_cds=WP_002288444.1;length=173;Parent=NC_017022.1_transcript1489	173
NC_017022.1	3UTR	-	1939295	ID=NC_017022.1_utr3_217;Name=3'UTR_00217;associated_term=NA;associated_gene=EFAU004_RS09610;associated_cds=WP_002289038.1;length=181;Parent=NC_017022.1_transcript1651	181
NC_017022.1	3UTR	-	2754652	ID=NC_017022.1_utr3_323;Name=3'UTR_00323;associated_term=NA;associated_gene=EFAU004_RS13505;associated_cds=WP_002287492.1;length=182;Parent=NC_017022.1_transcript2321	182
NC_017022.1	3UTR	+	725513	ID=NC_017022.1_utr3_90;Name=3'UTR_00090;associated_term=NA;associated_gene=EFAU004_RS03425;associated_cds=WP_002287001.1;length=190;Parent=NC_017022.1_transcript684	190
NC_017022.1	3UTR	+	1965532	ID=NC_017022.1_utr3_223;Name=3'UTR_00223;associated_term=NA;associated_gene=EFAU004_RS09725;associated_cds=WP_002289551.1;length=190;Parent=NC_017022.1_transcript1668	190
NC_017022.1	3UTR	-	1947116	ID=NC_017022.1_utr3_218;Name=3'UTR_00218;associated_term=NA;associated_gene=EFAU004_RS09645;associated_cds=WP_002319756.1;length=196;Parent=NC_017022.1_transcript1656	196
NC_017022.1	3UTR	-	1424803	ID=NC_017022.1_utr3_177;Name=3'UTR_00177;associated_term=NA;associated_gene=EFAU004_RS06940;associated_cds=WP_002289068.1;length=252;Parent=NC_017022.1_transcript1253	252
NC_017022.1	3UTR	-	752519	ID=NC_017022.1_utr3_94;Name=3'UTR_00094;associated_term=NA;associated_gene=EFAU004_RS03570;associated_cds=WP_002288083.1;length=265;Parent=NC_017022.1_transcript717	265
NC_017022.1	3UTR	-	698861	ID=NC_017022.1_utr3_89;Name=3'UTR_00089;associated_term=NA;associated_gene=EFAU004_RS03310;associated_cds=WP_014386989.1;length=272;Parent=NC_017022.1_transcript669	272
NC_017022.1	3UTR	+	2849778	ID=NC_017022.1_utr3_331;Name=3'UTR_00331;associated_term=NA;associated_gene=EFAU004_RS13975;associated_cds=WP_002330520.1;length=278;Parent=NC_017022.1_transcript2419	278
NC_017022.1	3UTR	-	1350139	ID=NC_017022.1_utr3_166;Name=3'UTR_00166;associated_term=NA;associated_gene=EFAU004_RS06555;associated_cds=WP_002287649.1;length=281;Parent=NC_017022.1_transcript1198	281
NC_017022.1	3UTR	-	1248608	ID=NC_017022.1_utr3_160;Name=3'UTR_00160;associated_term=NA;associated_gene=EFAU004_RS06055;associated_cds=WP_002294387.1;length=298;Parent=NC_017022.1_transcript1121	298
NC_017022.1	3UTR	-	2029883	ID=NC_017022.1_utr3_229;Name=3'UTR_00229;associated_term=NA;associated_gene=EFAU004_RS10040;associated_cds=WP_002296147.1;length=299;Parent=NC_017022.1_transcript1724	299

## Sheet: E. faecium AUS0004 with RIT
Table S5. 3'UTRs detected for expressed mRNAs - E. faecium
This table lists all 3'UTRs in E. faecium AUS0004 that have a predicted Rho-independent terminator
Genome accession number	Feature	Strand	TSS(-strand)/CDS(+strand)	TSS(+strand)/CDS(-strand)	Additional info	UTR length
NC_017022.1	5UTR	+	816478	816483	ID=NC_017022.1_utr3_143;Name=3'UTR_00143;length=5;associated_cds=WP_002286608.1;associated_gene=EFAU004_RS03880	5
NC_017022.1	5UTR	+	784420	784428	ID=NC_017022.1_utr3_137;Name=3'UTR_00137;length=8;associated_cds=WP_002286662.1;associated_gene=EFAU004_RS03725	8
NC_017022.1	5UTR	-	2044330	2044341	ID=NC_017022.1_utr3_338;Name=3'UTR_00338;length=-11;associated_cds=WP_079158009.1;associated_gene=EFAU004_RS15540	11
NC_017022.1	5UTR	-	256989	257004	ID=NC_017022.1_utr3_52;Name=3'UTR_00052;length=-15;associated_cds=WP_002288234.1;associated_gene=EFAU004_RS01265	15
NC_017022.1	5UTR	-	2954619	2954638	ID=NC_017022.1_utr3_497;Name=3'UTR_00497;length=-19;associated_cds=WP_002293121.1;associated_gene=EFAU004_RS14440	19
NC_017022.1	5UTR	-	2707840	2707860	ID=NC_017022.1_utr3_460;Name=3'UTR_00460;length=-20;associated_cds=WP_002296026.1;associated_gene=EFAU004_RS13275	20
NC_017022.1	5UTR	+	864062	864088	ID=NC_017022.1_utr3_146;Name=3'UTR_00146;length=26;associated_cds=WP_002286473.1;associated_gene=EFAU004_RS04220	26
NC_017022.1	5UTR	-	1731168	1731196	ID=NC_017022.1_utr3_288;Name=3'UTR_00288;length=-28;associated_cds=WP_002288523.1;associated_gene=EFAU004_RS08585	28
NC_017022.1	5UTR	-	1245595	1245625	ID=NC_017022.1_utr3_222;Name=3'UTR_00222;length=-30;associated_cds=WP_002296977.1;associated_gene=EFAU004_RS06035	30
NC_017022.1	5UTR	+	2530735	2530765	ID=NC_017022.1_utr3_429;Name=3'UTR_00429;length=30;associated_cds=WP_002293649.1;associated_gene=EFAU004_RS12560	30
NC_017022.1	5UTR	-	2943670	2943700	ID=NC_017022.1_utr3_494;Name=3'UTR_00494;length=-30;associated_cds=WP_002295263.1;associated_gene=EFAU004_RS14380	30
NC_017022.1	5UTR	-	2093060	2093092	ID=NC_017022.1_utr3_357;Name=3'UTR_00357;length=-32;associated_cds=WP_002289017.1;associated_gene=EFAU004_RS10355	32
NC_017022.1	5UTR	-	1454689	1454722	ID=NC_017022.1_utr3_260;Name=3'UTR_00260;length=-33;associated_cds=WP_002286473.1;associated_gene=EFAU004_RS07070	33
NC_017022.1	5UTR	-	1897448	1897482	ID=NC_017022.1_utr3_312;Name=3'UTR_00312;length=-34;associated_cds=WP_002290277.1;associated_gene=EFAU004_RS09390	34
NC_017022.1	5UTR	-	2651861	2651897	ID=NC_017022.1_utr3_444;Name=3'UTR_00444;length=-36;associated_cds=WP_002296055.1;associated_gene=EFAU004_RS13035	36
NC_017022.1	5UTR	-	2132829	2132867	ID=NC_017022.1_utr3_366;Name=3'UTR_00366;length=-38;associated_cds=WP_002296457.1;associated_gene=EFAU004_RS10555	38
NC_017022.1	5UTR	+	1003763	1003803	ID=NC_017022.1_utr3_169;Name=3'UTR_00169;length=40;associated_cds=WP_002289191.1;associated_gene=EFAU004_RS04865	40
NC_017022.1	5UTR	+	1089642	1089682	ID=NC_017022.1_utr3_191;Name=3'UTR_00191;length=40;associated_cds=WP_002289121.1;associated_gene=EFAU004_RS05285	40
NC_017022.1	5UTR	+	1959734	1959774	ID=NC_017022.1_utr3_322;Name=3'UTR_00322;length=40;associated_cds=WP_002296298.1;associated_gene=EFAU004_RS09695	40
NC_017022.1	5UTR	+	2668247	2668287	ID=NC_017022.1_utr3_449;Name=3'UTR_00449;length=40;associated_cds=WP_002287399.1;associated_gene=EFAU004_RS13095	40
NC_017022.1	5UTR	-	476778	476819	ID=NC_017022.1_utr3_86;Name=3'UTR_00086;length=-41;associated_cds=WP_002289440.1;associated_gene=EFAU004_RS02285	41
NC_017022.1	5UTR	-	674457	674498	ID=NC_017022.1_utr3_119;Name=3'UTR_00119;length=-41;associated_cds=WP_002287078.1;associated_gene=EFAU004_RS03185	41
NC_017022.1	5UTR	-	1024415	1024456	ID=NC_017022.1_utr3_173;Name=3'UTR_00173;length=-41;associated_cds=WP_002289543.1;associated_gene=EFAU004_RS04960	41
NC_017022.1	5UTR	-	2093405	2093446	ID=NC_017022.1_utr3_358;Name=3'UTR_00358;length=-41;associated_cds=WP_002296443.1;associated_gene=EFAU004_RS10360	41
NC_017022.1	5UTR	-	1394859	1394901	ID=NC_017022.1_utr3_252;Name=3'UTR_00252;length=-42;associated_cds=WP_002292860.1;associated_gene=EFAU004_RS06780	42
NC_017022.1	5UTR	-	2186175	2186217	ID=NC_017022.1_utr3_373;Name=3'UTR_00373;length=-42;associated_cds=WP_002290887.1;associated_gene=EFAU004_RS10840	42
NC_017022.1	5UTR	+	262052	262095	ID=NC_017022.1_utr3_53;Name=3'UTR_00053;length=43;associated_cds=WP_002322895.1;associated_gene=EFAU004_RS01285	43
NC_017022.1	5UTR	-	2039249	2039292	ID=NC_017022.1_utr3_336;Name=3'UTR_00336;length=-43;associated_cds=WP_002294955.1;associated_gene=EFAU004_RS10070	43
NC_017022.1	5UTR	-	2146890	2146933	ID=NC_017022.1_utr3_370;Name=3'UTR_00370;length=-43;associated_cds=WP_002296469.1;associated_gene=EFAU004_RS10615	43
NC_017022.1	5UTR	-	2941667	2941711	ID=NC_017022.1_utr3_493;Name=3'UTR_00493;length=-44;associated_cds=WP_002295264.1;associated_gene=EFAU004_RS14375	44
NC_017022.1	5UTR	-	287996	288041	ID=NC_017022.1_utr3_64;Name=3'UTR_00064;length=-45;associated_cds=WP_002303561.1;associated_gene=EFAU004_RS01430	45
NC_017022.1	5UTR	+	571780	571825	ID=NC_017022.1_utr3_103;Name=3'UTR_00103;length=45;associated_cds=WP_002289775.1;associated_gene=EFAU004_RS02730	45
NC_017022.1	5UTR	-	1039103	1039148	ID=NC_017022.1_utr3_176;Name=3'UTR_00176;length=-45;associated_cds=WP_002295807.1;associated_gene=EFAU004_RS05030	45
NC_017022.1	5UTR	-	1054310	1054355	ID=NC_017022.1_utr3_182;Name=3'UTR_00182;length=-45;associated_cds=WP_002296876.1;associated_gene=EFAU004_RS05105	45
NC_017022.1	5UTR	-	1376082	1376127	ID=NC_017022.1_utr3_245;Name=3'UTR_00245;length=-45;associated_cds=WP_002287603.1;associated_gene=EFAU004_RS06700	45
NC_017022.1	5UTR	-	2022745	2022790	ID=NC_017022.1_utr3_333;Name=3'UTR_00333;length=-45;associated_cds=WP_002287318.1;associated_gene=EFAU004_RS10000	45
NC_017022.1	5UTR	-	2500767	2500812	ID=NC_017022.1_utr3_423;Name=3'UTR_00423;length=-45;associated_cds=WP_002288948.1;associated_gene=EFAU004_RS12445	45
NC_017022.1	5UTR	+	954377	954423	ID=NC_017022.1_utr3_161;Name=3'UTR_00161;length=46;associated_cds=WP_002286049.1;associated_gene=EFAU004_RS04630	46
NC_017022.1	5UTR	-	2215684	2215730	ID=NC_017022.1_utr3_379;Name=3'UTR_00379;length=-46;associated_cds=WP_002289403.1;associated_gene=EFAU004_RS10985	46
NC_017022.1	5UTR	-	2252733	2252779	ID=NC_017022.1_utr3_383;Name=3'UTR_00383;length=-46;associated_cds=WP_014387120.1;associated_gene=EFAU004_RS11160	46
NC_017022.1	5UTR	-	184235	184282	ID=NC_017022.1_utr3_38;Name=3'UTR_00038;length=-47;associated_cds=WP_002294240.1;associated_gene=EFAU004_RS00935	47
NC_017022.1	5UTR	-	449190	449237	ID=NC_017022.1_utr3_82;Name=3'UTR_00082;length=-47;associated_cds=WP_002286296.1;associated_gene=EFAU004_RS02175	47
NC_017022.1	5UTR	+	567401	567448	ID=NC_017022.1_utr3_101;Name=3'UTR_00101;length=47;associated_cds=WP_002326790.1;associated_gene=EFAU004_RS02710	47
NC_017022.1	5UTR	+	774444	774491	ID=NC_017022.1_utr3_132;Name=3'UTR_00132;length=47;associated_cds=WP_002289452.1;associated_gene=EFAU004_RS03675	47
NC_017022.1	5UTR	-	161475	161523	ID=NC_017022.1_utr3_30;Name=3'UTR_00030;length=-48;associated_cds=WP_002294265.1;associated_gene=EFAU004_RS00830	48
NC_017022.1	5UTR	+	672958	673006	ID=NC_017022.1_utr3_118;Name=3'UTR_00118;length=48;associated_cds=WP_002287081.1;associated_gene=EFAU004_RS03175	48
NC_017022.1	5UTR	-	1219102	1219150	ID=NC_017022.1_utr3_213;Name=3'UTR_00213;length=-48;associated_cds=WP_002288394.1;associated_gene=EFAU004_RS05910	48
NC_017022.1	5UTR	+	136884	136933	ID=NC_017022.1_utr3_24;Name=3'UTR_00024;length=49;associated_cds=WP_002287900.1;associated_gene=EFAU004_RS00700	49
NC_017022.1	5UTR	-	2074845	2074894	ID=NC_017022.1_utr3_351;Name=3'UTR_00351;length=-49;associated_cds=WP_002292778.1;associated_gene=EFAU004_RS10230	49
NC_017022.1	5UTR	+	10038	10088	ID=NC_017022.1_utr3_1;Name=3'UTR_00001;length=50;associated_cds=WP_002288370.1;associated_gene=EFAU004_RS00045	50
NC_017022.1	5UTR	-	656774	656824	ID=NC_017022.1_utr3_115;Name=3'UTR_00115;length=-50;associated_cds=WP_002296177.1;associated_gene=EFAU004_RS03105	50
NC_017022.1	5UTR	+	782071	782121	ID=NC_017022.1_utr3_135;Name=3'UTR_00135;length=50;associated_cds=WP_002286666.1;associated_gene=EFAU004_RS03710	50
NC_017022.1	5UTR	+	997176	997226	ID=NC_017022.1_utr3_166;Name=3'UTR_00166;length=50;associated_cds=WP_002303804.1;associated_gene=EFAU004_RS04830	50
NC_017022.1	5UTR	-	2334434	2334484	ID=NC_017022.1_utr3_398;Name=3'UTR_00398;length=-50;associated_cds=WP_002294095.1;associated_gene=EFAU004_RS11545	50
NC_017022.1	5UTR	+	211694	211745	ID=NC_017022.1_utr3_46;Name=3'UTR_00046;length=51;associated_cds=WP_002293424.1;associated_gene=EFAU004_RS01060	51
NC_017022.1	5UTR	-	1387134	1387185	ID=NC_017022.1_utr3_249;Name=3'UTR_00249;length=-51;associated_cds=WP_002290817.1;associated_gene=EFAU004_RS06745	51
NC_017022.1	5UTR	-	2501746	2501797	ID=NC_017022.1_utr3_424;Name=3'UTR_00424;length=-51;associated_cds=WP_002296384.1;associated_gene=EFAU004_RS12450	51
NC_017022.1	5UTR	+	732377	732429	ID=NC_017022.1_utr3_126;Name=3'UTR_00126;length=52;associated_cds=WP_002290330.1;associated_gene=EFAU004_RS03455	52
NC_017022.1	5UTR	-	2678820	2678873	ID=NC_017022.1_utr3_452;Name=3'UTR_00452;length=-53;associated_cds=WP_002287377.1;associated_gene=EFAU004_RS13150	53
NC_017022.1	5UTR	-	2814590	2814643	ID=NC_017022.1_utr3_475;Name=3'UTR_00475;length=-53;associated_cds=WP_014387145.1;associated_gene=EFAU004_RS15860	53
NC_017022.1	5UTR	-	2881391	2881444	ID=NC_017022.1_utr3_482;Name=3'UTR_00482;length=-53;associated_cds=WP_002287505.1;associated_gene=EFAU004_RS14115	53
NC_017022.1	5UTR	+	32617	32671	ID=NC_017022.1_utr3_4;Name=3'UTR_00004;length=54;associated_cds=WP_002288649.1;associated_gene=EFAU004_RS00150	54
NC_017022.1	5UTR	-	1574787	1574841	ID=NC_017022.1_utr3_273;Name=3'UTR_00273;length=-54;associated_cds=WP_002296404.1;associated_gene=EFAU004_RS07810	54
NC_017022.1	5UTR	-	2069295	2069349	ID=NC_017022.1_utr3_349;Name=3'UTR_00349;length=-54;associated_cds=WP_002296588.1;associated_gene=EFAU004_RS10210	54
NC_017022.1	5UTR	-	2134773	2134827	ID=NC_017022.1_utr3_367;Name=3'UTR_00367;length=-54;associated_cds=WP_002290803.1;associated_gene=EFAU004_RS10560	54
NC_017022.1	5UTR	-	200118	200173	ID=NC_017022.1_utr3_42;Name=3'UTR_00042;length=-55;associated_cds=WP_002289745.1;associated_gene=EFAU004_RS01010	55
NC_017022.1	5UTR	+	518294	518350	ID=NC_017022.1_utr3_92;Name=3'UTR_00092;length=56;associated_cds=WP_002286825.1;associated_gene=EFAU004_RS02485	56
NC_017022.1	5UTR	-	1170137	1170193	ID=NC_017022.1_utr3_200;Name=3'UTR_00200;length=-56;associated_cds=WP_002303757.1;associated_gene=EFAU004_RS05655	56
NC_017022.1	5UTR	-	2234190	2234246	ID=NC_017022.1_utr3_381;Name=3'UTR_00381;length=-56;associated_cds=WP_002287957.1;associated_gene=EFAU004_RS11065	56
NC_017022.1	5UTR	-	642082	642139	ID=NC_017022.1_utr3_113;Name=3'UTR_00113;length=-57;associated_cds=WP_002293327.1;associated_gene=EFAU004_RS03050	57
NC_017022.1	5UTR	-	1329977	1330034	ID=NC_017022.1_utr3_234;Name=3'UTR_00234;length=-57;associated_cds=WP_002290970.1;associated_gene=EFAU004_RS06485	57
NC_017022.1	5UTR	-	2049589	2049646	ID=NC_017022.1_utr3_341;Name=3'UTR_00341;length=-57;associated_cds=WP_002296133.1;associated_gene=EFAU004_RS10105	57
NC_017022.1	5UTR	+	881953	882011	ID=NC_017022.1_utr3_147;Name=3'UTR_00147;length=58;associated_cds=WP_002303833.1;associated_gene=EFAU004_RS04305	58
NC_017022.1	5UTR	-	1894583	1894641	ID=NC_017022.1_utr3_311;Name=3'UTR_00311;length=-58;associated_cds=WP_002286913.1;associated_gene=EFAU004_RS09370	58
NC_017022.1	5UTR	-	2706644	2706702	ID=NC_017022.1_utr3_459;Name=3'UTR_00459;length=-58;associated_cds=WP_002287328.1;associated_gene=EFAU004_RS13270	58
NC_017022.1	5UTR	+	203245	203304	ID=NC_017022.1_utr3_43;Name=3'UTR_00043;length=59;associated_cds=WP_002289751.1;associated_gene=EFAU004_RS01025	59
NC_017022.1	5UTR	-	560357	560416	ID=NC_017022.1_utr3_99;Name=3'UTR_00099;length=-59;associated_cds=WP_002286728.1;associated_gene=EFAU004_RS02685	59
NC_017022.1	5UTR	+	1381301	1381360	ID=NC_017022.1_utr3_246;Name=3'UTR_00246;length=59;associated_cds=WP_002290825.1;associated_gene=EFAU004_RS06715	59
NC_017022.1	5UTR	+	1651786	1651845	ID=NC_017022.1_utr3_277;Name=3'UTR_00277;length=59;associated_cds=WP_014387067.1;associated_gene=EFAU004_RS08215	59
NC_017022.1	5UTR	-	2515399	2515458	ID=NC_017022.1_utr3_425;Name=3'UTR_00425;length=-59;associated_cds=WP_002293644.1;associated_gene=EFAU004_RS12495	59
NC_017022.1	5UTR	-	2692720	2692779	ID=NC_017022.1_utr3_454;Name=3'UTR_00454;length=-59;associated_cds=WP_002287348.1;associated_gene=EFAU004_RS13215	59
NC_017022.1	5UTR	-	2700072	2700131	ID=NC_017022.1_utr3_456;Name=3'UTR_00456;length=-59;associated_cds=WP_002296028.1;associated_gene=EFAU004_RS13250	59
NC_017022.1	5UTR	-	2912291	2912350	ID=NC_017022.1_utr3_487;Name=3'UTR_00487;length=-59;associated_cds=WP_002289384.1;associated_gene=EFAU004_RS14230	59
NC_017022.1	5UTR	+	237188	237248	ID=NC_017022.1_utr3_51;Name=3'UTR_00051;length=60;associated_cds=WP_002294182.1;associated_gene=EFAU004_RS01170	60
NC_017022.1	5UTR	-	2254868	2254929	ID=NC_017022.1_utr3_385;Name=3'UTR_00385;length=-61;associated_cds=WP_002287167.1;associated_gene=EFAU004_RS11175	61
NC_017022.1	5UTR	-	790906	790968	ID=NC_017022.1_utr3_139;Name=3'UTR_00139;length=-62;associated_cds=WP_002291876.1;associated_gene=EFAU004_RS03765	62
NC_017022.1	5UTR	+	1773845	1773907	ID=NC_017022.1_utr3_298;Name=3'UTR_00298;length=62;associated_cds=WP_002288457.1;associated_gene=EFAU004_RS08765	62
NC_017022.1	5UTR	+	729287	729350	ID=NC_017022.1_utr3_125;Name=3'UTR_00125;length=63;associated_cds=WP_002294057.1;associated_gene=EFAU004_RS03440	63
NC_017022.1	5UTR	+	524922	524986	ID=NC_017022.1_utr3_94;Name=3'UTR_00094;length=64;associated_cds=WP_002304207.1;associated_gene=EFAU004_RS02530	64
NC_017022.1	5UTR	+	1077692	1077756	ID=NC_017022.1_utr3_187;Name=3'UTR_00187;length=64;associated_cds=WP_002288064.1;associated_gene=EFAU004_RS05205	64
NC_017022.1	5UTR	-	1186829	1186894	ID=NC_017022.1_utr3_205;Name=3'UTR_00205;length=-65;associated_cds=WP_002289257.1;associated_gene=EFAU004_RS05755	65
NC_017022.1	5UTR	+	1898827	1898892	ID=NC_017022.1_utr3_313;Name=3'UTR_00313;length=65;associated_cds=WP_002293714.1;associated_gene=EFAU004_RS09400	65
NC_017022.1	5UTR	+	8679	8745	ID=NC_017022.1_utr3_0;Name=3'UTR_00000;length=66;associated_cds=WP_002288365.1;associated_gene=EFAU004_RS00030	66
NC_017022.1	5UTR	-	683766	683832	ID=NC_017022.1_utr3_122;Name=3'UTR_00122;length=-66;associated_cds=WP_002297274.1;associated_gene=EFAU004_RS03245	66
NC_017022.1	5UTR	-	968244	968310	ID=NC_017022.1_utr3_162;Name=3'UTR_00162;length=-66;associated_cds=WP_002295867.1;associated_gene=EFAU004_RS04690	66
NC_017022.1	5UTR	-	1636783	1636849	ID=NC_017022.1_utr3_276;Name=3'UTR_00276;length=-66;associated_cds=WP_009320805.1;associated_gene=EFAU004_RS08120	66
NC_017022.1	5UTR	-	2655547	2655613	ID=NC_017022.1_utr3_446;Name=3'UTR_00446;length=-66;associated_cds=WP_002287418.1;associated_gene=EFAU004_RS13050	66
NC_017022.1	5UTR	-	115400	115467	ID=NC_017022.1_utr3_21;Name=3'UTR_00021;length=-67;associated_cds=WP_002345016.1;associated_gene=EFAU004_RS00625	67
NC_017022.1	5UTR	-	1569706	1569773	ID=NC_017022.1_utr3_272;Name=3'UTR_00272;length=-67;associated_cds=WP_002296400.1;associated_gene=EFAU004_RS07790	67
NC_017022.1	5UTR	-	2141368	2141435	ID=NC_017022.1_utr3_369;Name=3'UTR_00369;length=-67;associated_cds=WP_002295080.1;associated_gene=EFAU004_RS10590	67
NC_017024.1	5UTR	+	2040	2107	ID=NC_017024.1_utr3_498;Name=3'UTR_00498;length=67;associated_cds=WP_044031640.1;associated_gene=EFAU004_RS14805	67
NC_017022.1	5UTR	-	2262704	2262772	ID=NC_017022.1_utr3_388;Name=3'UTR_00388;length=-68;associated_cds=WP_002287147.1;associated_gene=EFAU004_RS11225	68
NC_017022.1	5UTR	-	420147	420216	ID=NC_017022.1_utr3_76;Name=3'UTR_00076;length=-69;associated_cds=WP_002322202.1;associated_gene=EFAU004_RS02035	69
NC_017022.1	5UTR	+	218604	218674	ID=NC_017022.1_utr3_48;Name=3'UTR_00048;length=70;associated_cds=WP_002294206.1;associated_gene=EFAU004_RS01095	70
NC_017022.1	5UTR	-	2917690	2917760	ID=NC_017022.1_utr3_488;Name=3'UTR_00488;length=-70;associated_cds=WP_002289023.1;associated_gene=EFAU004_RS14255	70
NC_017022.1	5UTR	+	89560	89631	ID=NC_017022.1_utr3_13;Name=3'UTR_00013;length=71;associated_cds=WP_002289197.1;associated_gene=EFAU004_RS00420	71
NC_017022.1	5UTR	-	68650	68722	ID=NC_017022.1_utr3_6;Name=3'UTR_00006;length=-72;associated_cds=WP_000868795.1;associated_gene=EFAU004_RS00320	72
NC_017022.1	5UTR	-	1101458	1101530	ID=NC_017022.1_utr3_195;Name=3'UTR_00195;length=-72;associated_cds=WP_002297107.1;associated_gene=EFAU004_RS05355	72
NC_017022.1	5UTR	-	494219	494292	ID=NC_017022.1_utr3_89;Name=3'UTR_00089;length=-73;associated_cds=WP_002293692.1;associated_gene=EFAU004_RS02370	73
NC_017022.1	5UTR	-	1494424	1494497	ID=NC_017022.1_utr3_263;Name=3'UTR_00263;length=-73;associated_cds=WP_002295944.1;associated_gene=EFAU004_RS07360	73
NC_017022.1	5UTR	-	544447	544521	ID=NC_017022.1_utr3_95;Name=3'UTR_00095;length=-74;associated_cds=WP_002286766.1;associated_gene=EFAU004_RS02620	74
NC_017022.1	5UTR	-	180473	180548	ID=NC_017022.1_utr3_36;Name=3'UTR_00036;length=-75;associated_cds=WP_002294246.1;associated_gene=EFAU004_RS00920	75
NC_017022.1	5UTR	-	199450	199525	ID=NC_017022.1_utr3_41;Name=3'UTR_00041;length=-75;associated_cds=WP_002289744.1;associated_gene=EFAU004_RS01005	75
NC_017022.1	5UTR	+	286495	286570	ID=NC_017022.1_utr3_62;Name=3'UTR_00062;length=75;associated_cds=WP_002296391.1;associated_gene=EFAU004_RS01420	75
NC_017022.1	5UTR	-	182689	182765	ID=NC_017022.1_utr3_37;Name=3'UTR_00037;length=-76;associated_cds=WP_002294242.1;associated_gene=EFAU004_RS00930	76
NC_017022.1	5UTR	-	208601	208677	ID=NC_017022.1_utr3_45;Name=3'UTR_00045;length=-76;associated_cds=WP_002296551.1;associated_gene=EFAU004_RS01055	76
NC_017022.1	5UTR	-	931115	931191	ID=NC_017022.1_utr3_159;Name=3'UTR_00159;length=-76;associated_cds=WP_002286070.1;associated_gene=EFAU004_RS04540	76
NC_017022.1	5UTR	-	2629833	2629910	ID=NC_017022.1_utr3_440;Name=3'UTR_00440;length=-77;associated_cds=WP_014387138.1;associated_gene=EFAU004_RS12950	77
NC_017022.1	5UTR	+	556915	556993	ID=NC_017022.1_utr3_98;Name=3'UTR_00098;length=78;associated_cds=WP_002286741.1;associated_gene=EFAU004_RS02665	78
NC_017022.1	5UTR	+	2460524	2460602	ID=NC_017022.1_utr3_416;Name=3'UTR_00416;length=78;associated_cds=WP_002287792.1;associated_gene=EFAU004_RS12230	78
NC_017022.1	5UTR	-	1036722	1036801	ID=NC_017022.1_utr3_175;Name=3'UTR_00175;length=-79;associated_cds=WP_002295811.1;associated_gene=EFAU004_RS05015	79
NC_017022.1	5UTR	-	1259514	1259593	ID=NC_017022.1_utr3_225;Name=3'UTR_00225;length=-79;associated_cds=WP_002289459.1;associated_gene=EFAU004_RS06095	79
NC_017022.1	5UTR	-	1686520	1686599	ID=NC_017022.1_utr3_281;Name=3'UTR_00281;length=-79;associated_cds=WP_002296311.1;associated_gene=EFAU004_RS08385	79
NC_017022.1	5UTR	-	2927829	2927908	ID=NC_017022.1_utr3_490;Name=3'UTR_00490;length=-79;associated_cds=WP_002289035.1;associated_gene=EFAU004_RS14290	79
NC_017022.1	5UTR	+	277769	277849	ID=NC_017022.1_utr3_61;Name=3'UTR_00061;length=80;associated_cds=WP_002287838.1;associated_gene=EFAU004_RS01375	80
NC_017022.1	5UTR	-	894526	894606	ID=NC_017022.1_utr3_150;Name=3'UTR_00150;length=-80;associated_cds=WP_002288165.1;associated_gene=EFAU004_RS04365	80
NC_017022.1	5UTR	-	1230406	1230486	ID=NC_017022.1_utr3_217;Name=3'UTR_00217;length=-80;associated_cds=WP_002289878.1;associated_gene=EFAU004_RS05965	80
NC_017022.1	5UTR	-	1372305	1372385	ID=NC_017022.1_utr3_243;Name=3'UTR_00243;length=-80;associated_cds=WP_002287607.1;associated_gene=EFAU004_RS06680	80
NC_017022.1	5UTR	+	164703	164784	ID=NC_017022.1_utr3_31;Name=3'UTR_00031;length=81;associated_cds=WP_002294261.1;associated_gene=EFAU004_RS00845	81
NC_017022.1	5UTR	+	1048400	1048481	ID=NC_017022.1_utr3_180;Name=3'UTR_00180;length=81;associated_cds=WP_002295795.1;associated_gene=EFAU004_RS05070	81
NC_017022.1	5UTR	+	591856	591938	ID=NC_017022.1_utr3_105;Name=3'UTR_00105;length=82;associated_cds=WP_002298394.1;associated_gene=EFAU004_RS02840	82
NC_017022.1	5UTR	+	2439956	2440038	ID=NC_017022.1_utr3_413;Name=3'UTR_00413;length=82;associated_cds=WP_002288856.1;associated_gene=EFAU004_RS12125	82
NC_017022.1	5UTR	-	2605450	2605532	ID=NC_017022.1_utr3_437;Name=3'UTR_00437;length=-82;associated_cds=WP_002285969.1;associated_gene=EFAU004_RS12860	82
NC_017022.1	5UTR	+	569912	569996	ID=NC_017022.1_utr3_102;Name=3'UTR_00102;length=84;associated_cds=WP_002304230.1;associated_gene=EFAU004_RS02720	84
NC_017022.1	5UTR	+	1392813	1392897	ID=NC_017022.1_utr3_251;Name=3'UTR_00251;length=84;associated_cds=WP_002296956.1;associated_gene=EFAU004_RS06770	84
NC_017022.1	5UTR	+	2128208	2128292	ID=NC_017022.1_utr3_365;Name=3'UTR_00365;length=84;associated_cds=WP_002292852.1;associated_gene=EFAU004_RS10535	84
NC_017022.1	5UTR	-	2522294	2522378	ID=NC_017022.1_utr3_427;Name=3'UTR_00427;length=-84;associated_cds=WP_002289097.1;associated_gene=EFAU004_RS12520	84
NC_017022.1	5UTR	-	2396270	2396355	ID=NC_017022.1_utr3_407;Name=3'UTR_00407;length=-85;associated_cds=WP_002321047.1;associated_gene=EFAU004_RS11840	85
NC_017022.1	5UTR	-	881976	882062	ID=NC_017022.1_utr3_148;Name=3'UTR_00148;length=-86;associated_cds=WP_002295931.1;associated_gene=EFAU004_RS04310	86
NC_017022.1	5UTR	+	918733	918819	ID=NC_017022.1_utr3_155;Name=3'UTR_00155;length=86;associated_cds=WP_002295905.1;associated_gene=EFAU004_RS04480	86
NC_017022.1	5UTR	-	2282588	2282674	ID=NC_017022.1_utr3_394;Name=3'UTR_00394;length=-86;associated_cds=WP_002287122.1;associated_gene=EFAU004_RS11315	86
NC_017022.1	5UTR	+	146219	146307	ID=NC_017022.1_utr3_27;Name=3'UTR_00027;length=88;associated_cds=WP_002287911.1;associated_gene=EFAU004_RS00745	88
NC_017022.1	5UTR	-	978104	978192	ID=NC_017022.1_utr3_164;Name=3'UTR_00164;length=-88;associated_cds=WP_002288888.1;associated_gene=EFAU004_RS04735	88
NC_017022.1	5UTR	+	2280448	2280536	ID=NC_017022.1_utr3_392;Name=3'UTR_00392;length=88;associated_cds=WP_080019249.1;associated_gene=EFAU004_RS15610	88
NC_017022.1	5UTR	-	1000213	1000302	ID=NC_017022.1_utr3_168;Name=3'UTR_00168;length=-89;associated_cds=WP_002296111.1;associated_gene=EFAU004_RS04855	89
NC_017022.1	5UTR	-	2281908	2281997	ID=NC_017022.1_utr3_393;Name=3'UTR_00393;length=-89;associated_cds=WP_002294021.1;associated_gene=EFAU004_RS11310	89
NC_017022.1	5UTR	-	1058597	1058687	ID=NC_017022.1_utr3_183;Name=3'UTR_00183;length=-90;associated_cds=WP_002296881.1;associated_gene=EFAU004_RS05130	90
NC_017022.1	5UTR	-	1498946	1499036	ID=NC_017022.1_utr3_264;Name=3'UTR_00264;length=-90;associated_cds=WP_002291278.1;associated_gene=EFAU004_RS07395	90
NC_017022.1	5UTR	-	118283	118374	ID=NC_017022.1_utr3_22;Name=3'UTR_00022;length=-91;associated_cds=WP_002290463.1;associated_gene=EFAU004_RS00630	91
NC_017022.1	5UTR	-	1082349	1082443	ID=NC_017022.1_utr3_189;Name=3'UTR_00189;length=-94;associated_cds=WP_002289113.1;associated_gene=EFAU004_RS05255	94
NC_017032.1	5UTR	-	14932	15026	ID=NC_017032.1_utr3_500;Name=3'UTR_00500;length=-94;associated_cds=WP_002300033.1;associated_gene=EFAU004_RS14525	94
NC_017022.1	5UTR	+	231224	231321	ID=NC_017022.1_utr3_49;Name=3'UTR_00049;length=97;associated_cds=WP_002296565.1;associated_gene=EFAU004_RS01150	97
NC_017022.1	5UTR	-	2543385	2543482	ID=NC_017022.1_utr3_432;Name=3'UTR_00432;length=-97;associated_cds=WP_002286197.1;associated_gene=EFAU004_RS12630	97
NC_017022.1	5UTR	-	2659827	2659924	ID=NC_017022.1_utr3_447;Name=3'UTR_00447;length=-97;associated_cds=WP_002287412.1;associated_gene=EFAU004_RS13065	97
NC_017022.1	5UTR	+	2729971	2730068	ID=NC_017022.1_utr3_468;Name=3'UTR_00468;length=97;associated_cds=WP_002287507.1;associated_gene=EFAU004_RS13380	97
NC_017022.1	5UTR	+	331962	332060	ID=NC_017022.1_utr3_69;Name=3'UTR_00069;length=98;associated_cds=WP_002287564.1;associated_gene=EFAU004_RS01665	98
NC_017022.1	5UTR	+	77832	77934	ID=NC_017022.1_utr3_9;Name=3'UTR_00009;length=102;associated_cds=WP_002304012.1;associated_gene=EFAU004_RS00365	102
NC_017022.1	5UTR	-	1683964	1684067	ID=NC_017022.1_utr3_280;Name=3'UTR_00280;length=-103;associated_cds=WP_002292069.1;associated_gene=EFAU004_RS08375	103
NC_017022.1	5UTR	+	2113638	2113741	ID=NC_017022.1_utr3_362;Name=3'UTR_00362;length=103;associated_cds=WP_002295115.1;associated_gene=EFAU004_RS10465	103
NC_017022.1	5UTR	-	2223987	2224091	ID=NC_017022.1_utr3_380;Name=3'UTR_00380;length=-104;associated_cds=WP_002294067.1;associated_gene=EFAU004_RS11025	104
NC_017022.1	5UTR	+	1832865	1832972	ID=NC_017022.1_utr3_310;Name=3'UTR_00310;length=107;associated_cds=WP_002288985.1;associated_gene=EFAU004_RS09075	107
NC_017022.1	5UTR	-	1203339	1203450	ID=NC_017022.1_utr3_208;Name=3'UTR_00208;length=-111;associated_cds=WP_002296994.1;associated_gene=EFAU004_RS05825	111
NC_017022.1	5UTR	+	114185	114297	ID=NC_017022.1_utr3_20;Name=3'UTR_00020;length=112;associated_cds=WP_002288724.1;associated_gene=EFAU004_RS00615	112
NC_017022.1	5UTR	-	2266939	2267051	ID=NC_017022.1_utr3_390;Name=3'UTR_00390;length=-112;associated_cds=WP_002287139.1;associated_gene=EFAU004_RS11245	112
NC_017022.1	5UTR	-	2098133	2098248	ID=NC_017022.1_utr3_359;Name=3'UTR_00359;length=-115;associated_cds=WP_002292812.1;associated_gene=EFAU004_RS10385	115
NC_017022.1	5UTR	+	978034	978153	ID=NC_017022.1_utr3_165;Name=3'UTR_00165;length=119;associated_cds=WP_002288890.1;associated_gene=EFAU004_RS04730	119
NC_017022.1	5UTR	-	2015458	2015578	ID=NC_017022.1_utr3_332;Name=3'UTR_00332;length=-120;associated_cds=WP_002288753.1;associated_gene=EFAU004_RS09970	120
NC_017022.1	5UTR	-	2361694	2361816	ID=NC_017022.1_utr3_402;Name=3'UTR_00402;length=-122;associated_cds=WP_002287264.1;associated_gene=EFAU004_RS11685	122
NC_017022.1	5UTR	+	2431163	2431287	ID=NC_017022.1_utr3_410;Name=3'UTR_00410;length=124;associated_cds=WP_002286674.1;associated_gene=EFAU004_RS12075	124
NC_017022.1	5UTR	-	1192795	1192922	ID=NC_017022.1_utr3_206;Name=3'UTR_00206;length=-127;associated_cds=WP_002289263.1;associated_gene=EFAU004_RS05790	127
NC_017032.1	5UTR	+	49719	49846	ID=NC_017032.1_utr3_503;Name=3'UTR_00503;length=127;associated_cds=WP_002332661.1;associated_gene=EFAU004_RS14715	127
NC_017022.1	5UTR	-	2687020	2687148	ID=NC_017022.1_utr3_453;Name=3'UTR_00453;length=-128;associated_cds=WP_002287365.1;associated_gene=EFAU004_RS13180	128
NC_017022.1	5UTR	-	234521	234650	ID=NC_017022.1_utr3_50;Name=3'UTR_00050;length=-129;associated_cds=WP_002296566.1;associated_gene=EFAU004_RS01160	129
NC_017022.1	5UTR	-	1026634	1026763	ID=NC_017022.1_utr3_174;Name=3'UTR_00174;length=-129;associated_cds=WP_002296093.1;associated_gene=EFAU004_RS04970	129
NC_017022.1	5UTR	-	1039827	1039956	ID=NC_017022.1_utr3_177;Name=3'UTR_00177;length=-129;associated_cds=WP_002296575.1;associated_gene=EFAU004_RS05035	129
NC_017022.1	5UTR	+	16606	16740	ID=NC_017022.1_utr3_2;Name=3'UTR_00002;length=134;associated_cds=WP_002288373.1;associated_gene=EFAU004_RS00080	134
NC_017022.1	5UTR	+	405970	406104	ID=NC_017022.1_utr3_74;Name=3'UTR_00074;length=134;associated_cds=WP_002286405.1;associated_gene=EFAU004_RS01985	134
NC_017022.1	5UTR	+	769820	769965	ID=NC_017022.1_utr3_131;Name=3'UTR_00131;length=145;associated_cds=WP_002288107.1;associated_gene=EFAU004_RS03640	145
NC_017022.1	5UTR	-	1050741	1050888	ID=NC_017022.1_utr3_181;Name=3'UTR_00181;length=-147;associated_cds=WP_002295789.1;associated_gene=EFAU004_RS05085	147
NC_017022.1	5UTR	-	1357728	1357882	ID=NC_017022.1_utr3_240;Name=3'UTR_00240;length=-154;associated_cds=WP_002287639.1;associated_gene=EFAU004_RS06585	154
NC_017022.1	5UTR	-	1759579	1759735	ID=NC_017022.1_utr3_295;Name=3'UTR_00295;length=-156;associated_cds=WP_002288432.1;associated_gene=EFAU004_RS08705	156
NC_017022.1	5UTR	-	1916963	1917119	ID=NC_017022.1_utr3_317;Name=3'UTR_00317;length=-156;associated_cds=WP_002287105.1;associated_gene=EFAU004_RS09485	156
NC_017022.1	5UTR	+	287883	288040	ID=NC_017022.1_utr3_63;Name=3'UTR_00063;length=157;associated_cds=WP_002295743.1;associated_gene=EFAU004_RS01425	157
NC_017022.1	5UTR	-	386915	387080	ID=NC_017022.1_utr3_73;Name=3'UTR_00073;length=-165;associated_cds=WP_002321527.1;associated_gene=EFAU004_RS01895	165
NC_017022.1	5UTR	+	465737	465918	ID=NC_017022.1_utr3_85;Name=3'UTR_00085;length=181;associated_cds=WP_002286271.1;associated_gene=EFAU004_RS02240	181
NC_017022.1	5UTR	-	2047089	2047270	ID=NC_017022.1_utr3_340;Name=3'UTR_00340;length=-181;associated_cds=WP_002291653.1;associated_gene=EFAU004_RS10095	181
NC_017022.1	5UTR	-	2709159	2709341	ID=NC_017022.1_utr3_461;Name=3'UTR_00461;length=-182;associated_cds=WP_002296025.1;associated_gene=EFAU004_RS13280	182
NC_017022.1	5UTR	-	1786187	1786370	ID=NC_017022.1_utr3_301;Name=3'UTR_00301;length=-183;associated_cds=WP_002288533.1;associated_gene=EFAU004_RS08845	183
NC_017022.1	5UTR	+	111442	111633	ID=NC_017022.1_utr3_19;Name=3'UTR_00019;length=191;associated_cds=WP_002288716.1;associated_gene=EFAU004_RS00600	191
NC_017022.1	5UTR	-	2885705	2885906	ID=NC_017022.1_utr3_484;Name=3'UTR_00484;length=-201;associated_cds=WP_002288119.1;associated_gene=EFAU004_RS14140	201
NC_017022.1	5UTR	+	2793333	2793536	ID=NC_017022.1_utr3_474;Name=3'UTR_00474;length=203;associated_cds=WP_002297358.1;associated_gene=EFAU004_RS13710	203
NC_017022.1	5UTR	-	2059242	2059456	ID=NC_017022.1_utr3_346;Name=3'UTR_00346;length=-214;associated_cds=WP_002289490.1;associated_gene=EFAU004_RS10160	214
NC_017022.1	5UTR	+	492157	492378	ID=NC_017022.1_utr3_88;Name=3'UTR_00088;length=221;associated_cds=WP_002286868.1;associated_gene=EFAU004_RS02355	221
NC_017022.1	5UTR	-	2159387	2159624	ID=NC_017022.1_utr3_372;Name=3'UTR_00372;length=-237;associated_cds=WP_002296481.1;associated_gene=EFAU004_RS10665	237
NC_017022.1	5UTR	+	1092360	1092614	ID=NC_017022.1_utr3_192;Name=3'UTR_00192;length=254;associated_cds=WP_002289123.1;associated_gene=EFAU004_RS05295	254
NC_017022.1	5UTR	-	2720448	2720708	ID=NC_017022.1_utr3_465;Name=3'UTR_00465;length=-260;associated_cds=WP_002287447.1;associated_gene=EFAU004_RS13345	260
NC_017022.1	5UTR	-	1185246	1185514	ID=NC_017022.1_utr3_204;Name=3'UTR_00204;length=-268;associated_cds=WP_002289767.1;associated_gene=EFAU004_RS05740	268
NC_017022.1	5UTR	-	2584887	2585163	ID=NC_017022.1_utr3_435;Name=3'UTR_00435;length=-276;associated_cds=WP_002285994.1;associated_gene=EFAU004_RS12790	276
NC_017022.1	5UTR	-	270816	271107	ID=NC_017022.1_utr3_57;Name=3'UTR_00057;length=-291;associated_cds=WP_002289317.1;associated_gene=EFAU004_RS01340	291
NC_017022.1	5UTR	+	1158928	1159233	ID=NC_017022.1_utr3_199;Name=3'UTR_00199;length=305;associated_cds=WP_002297120.1;associated_gene=EFAU004_RS05595	305
NC_017022.1	5UTR	-	2082273	2082595	ID=NC_017022.1_utr3_356;Name=3'UTR_00356;length=-322;associated_cds=WP_002289005.1;associated_gene=EFAU004_RS10300	322

## Sheet: E. faecalis V583 no RIT
Table S5. 3'UTRs detected for expressed mRNAs - E. faecalis
This table lists all 3'UTRs in E. faecalis V583 that do not have a predicted Rho-independent terminator
Genome accession number	Feature	Strand	TSS(-strand)/CDS(+strand)	TSS(+strand)/CDS(-strand)	Additional info	UTR length
NC_004668.1	3UTR	-	2655846	2655848	ID=NC_004668.1_utr3_205;Name=3'UTR_00205;associated_term=NA;associated_gene=EF2748;associated_cds=NP_816377.1;length=2;Parent=NC_004668.1_transcript1846	2
NC_004668.1	3UTR	-	3114864	3114867	ID=NC_004668.1_utr3_266;Name=3'UTR_00266;associated_term=NA;associated_gene=EF3242;associated_cds=NP_816840.1;length=3;Parent=NC_004668.1_transcript2164	3
NC_004668.1	3UTR	+	889548	889553	ID=NC_004668.1_utr3_72;Name=3'UTR_00072;associated_term=NA;associated_gene=EF0926;associated_cds=NP_814664.1;length=5;Parent=NC_004668.1_transcript699	5
NC_004668.1	3UTR	+	926642	926648	ID=NC_004668.1_utr3_75;Name=3'UTR_00075;associated_term=NA;associated_gene=EF0963;associated_cds=NP_814700.1;length=6;Parent=NC_004668.1_transcript725	6
NC_004668.1	3UTR	-	2523516	2523522	ID=NC_004668.1_utr3_186;Name=3'UTR_00186;associated_term=NA;associated_gene=EF2606;associated_cds=NP_816245.1;length=6;Parent=NC_004668.1_transcript1747	6
NC_004668.1	3UTR	-	1685843	1685850	ID=NC_004668.1_utr3_133;Name=3'UTR_00133;associated_term=NA;associated_gene=EF1739;associated_cds=NP_815443.1;length=7;Parent=NC_004668.1_transcript1199	7
NC_004668.1	3UTR	-	2564431	2564438	ID=NC_004668.1_utr3_193;Name=3'UTR_00193;associated_term=NA;associated_gene=EF2652;associated_cds=NP_816290.1;length=7;Parent=NC_004668.1_transcript1777	7
NC_004668.1	3UTR	-	2925660	2925667	ID=NC_004668.1_utr3_234;Name=3'UTR_00234;associated_term=NA;associated_gene=EF3051;associated_cds=NP_816663.1;length=7;Parent=NC_004668.1_transcript2028	7
NC_004668.1	3UTR	-	190230	190238	ID=NC_004668.1_utr3_18;Name=3'UTR_00018;associated_term=NA;associated_gene=EF0197;associated_cds=NP_813996.1;length=8;Parent=NC_004668.1_transcript136	8
NC_004668.1	3UTR	-	927100	927109	ID=NC_004668.1_utr3_77;Name=3'UTR_00077;associated_term=NA;associated_gene=EF0965;associated_cds=NP_814702.1;length=9;Parent=NC_004668.1_transcript727	9
NC_004668.1	3UTR	-	2083893	2083902	ID=NC_004668.1_utr3_159;Name=3'UTR_00159;associated_term=NA;associated_gene=EF2174;associated_cds=NP_815836.1;length=9;Parent=NC_004668.1_transcript1479	9
NC_004668.1	3UTR	-	2457182	2457192	ID=NC_004668.1_utr3_179;Name=3'UTR_00179;associated_term=NA;associated_gene=EF2537;associated_cds=NP_816180.1;length=10;Parent=NC_004668.1_transcript1708	10
NC_004668.1	3UTR	+	1538994	1539006	ID=NC_004668.1_utr3_121;Name=3'UTR_00121;associated_term=NA;associated_gene=EF1585;associated_cds=NP_815301.1;length=12;Parent=NC_004668.1_transcript1107	12
NC_004668.1	3UTR	-	2565537	2565549	ID=NC_004668.1_utr3_194;Name=3'UTR_00194;associated_term=NA;associated_gene=EF2653;associated_cds=NP_816291.1;length=12;Parent=NC_004668.1_transcript1778	12
NC_004668.1	3UTR	+	940864	940877	ID=NC_004668.1_utr3_79;Name=3'UTR_00079;associated_term=NA;associated_gene=EF0982;associated_cds=NP_814718.1;length=13;Parent=NC_004668.1_transcript739	13
NC_004668.1	3UTR	-	2640131	2640144	ID=NC_004668.1_utr3_200;Name=3'UTR_00200;associated_term=NA;associated_gene=EF2729;associated_cds=NP_816360.1;length=13;Parent=NC_004668.1_transcript1831	13
NC_004668.1	3UTR	-	2466373	2466387	ID=NC_004668.1_utr3_183;Name=3'UTR_00183;associated_term=NA;associated_gene=EF2553;associated_cds=NP_816195.1;length=14;Parent=NC_004668.1_transcript1720	14
NC_004668.1	3UTR	+	372996	373011	ID=NC_004668.1_utr3_34;Name=3'UTR_00034;associated_term=NA;associated_gene=EF0401;associated_cds=NP_814190.1;length=15;Parent=NC_004668.1_transcript258	15
NC_004668.1	3UTR	-	2856392	2856407	ID=NC_004668.1_utr3_232;Name=3'UTR_00232;associated_term=NA;associated_gene=EF2983;associated_cds=NP_816600.1;length=15;Parent=NC_004668.1_transcript1982	15
NC_004668.1	3UTR	-	231259	231275	ID=NC_004668.1_utr3_22;Name=3'UTR_00022;associated_term=NA;associated_gene=EF0255;associated_cds=NP_814049.1;length=16;Parent=NC_004668.1_transcript158	16
NC_004668.1	3UTR	-	2330503	2330519	ID=NC_004668.1_utr3_170;Name=3'UTR_00170;associated_term=NA;associated_gene=EF2410;associated_cds=NP_816059.1;length=16;Parent=NC_004668.1_transcript1632	16
NC_004668.1	3UTR	-	822312	822329	ID=NC_004668.1_utr3_66;Name=3'UTR_00066;associated_term=NA;associated_gene=EF0862;associated_cds=NP_814604.1;length=17;Parent=NC_004668.1_transcript650	17
NC_004668.1	3UTR	-	1808889	1808906	ID=NC_004668.1_utr3_140;Name=3'UTR_00140;associated_term=NA;associated_gene=EF1863;associated_cds=NP_815550.1;length=17;Parent=NC_004668.1_transcript1273	17
NC_004668.1	3UTR	+	1917661	1917678	ID=NC_004668.1_utr3_147;Name=3'UTR_00147;associated_term=NA;associated_gene=EF1979;associated_cds=NP_815655.1;length=17;Parent=NC_004668.1_transcript1347	17
NC_004668.1	3UTR	+	333220	333238	ID=NC_004668.1_utr3_31;Name=3'UTR_00031;associated_term=NA;associated_gene=EF0365;associated_cds=NP_814156.1;length=18;Parent=NC_004668.1_transcript232	18
NC_004668.1	3UTR	-	1985430	1985448	ID=NC_004668.1_utr3_154;Name=3'UTR_00154;associated_term=NA;associated_gene=EF2064;associated_cds=NP_815727.1;length=18;Parent=NC_004668.1_transcript1417	18
NC_004668.1	3UTR	-	2283471	2283490	ID=NC_004668.1_utr3_165;Name=3'UTR_00165;associated_term=NA;associated_gene=EF2361;associated_cds=NP_816013.1;length=19;Parent=NC_004668.1_transcript1605	19
NC_004668.1	3UTR	-	2576617	2576637	ID=NC_004668.1_utr3_196;Name=3'UTR_00196;associated_term=NA;associated_gene=EF2664;associated_cds=NP_816301.1;length=20;Parent=NC_004668.1_transcript1786	20
NC_004668.1	3UTR	+	629234	629255	ID=NC_004668.1_utr3_49;Name=3'UTR_00049;associated_term=NA;associated_gene=EF0676;associated_cds=NP_814427.1;length=21;Parent=NC_004668.1_transcript515	21
NC_004668.1	3UTR	-	3102571	3102592	ID=NC_004668.1_utr3_265;Name=3'UTR_00265;associated_term=NA;associated_gene=EF3235;associated_cds=NP_816833.1;length=21;Parent=NC_004668.1_transcript2158	21
NC_004668.1	3UTR	+	1504938	1504962	ID=NC_004668.1_utr3_116;Name=3'UTR_00116;associated_term=NA;associated_gene=EF1549;associated_cds=NP_815266.1;length=24;Parent=NC_004668.1_transcript1086	24
NC_004668.1	3UTR	-	1674777	1674803	ID=NC_004668.1_utr3_129;Name=3'UTR_00129;associated_term=NA;associated_gene=EF1725;associated_cds=NP_815430.1;length=26;Parent=NC_004668.1_transcript1190	26
NC_004668.1	3UTR	-	2285944	2285970	ID=NC_004668.1_utr3_166;Name=3'UTR_00166;associated_term=NA;associated_gene=EF2363;associated_cds=NP_816015.1;length=26;Parent=NC_004668.1_transcript1607	26
NC_004668.1	3UTR	+	844860	844888	ID=NC_004668.1_utr3_69;Name=3'UTR_00069;associated_term=NA;associated_gene=EF0880;associated_cds=NP_814619.1;length=28;Parent=NC_004668.1_transcript666	28
NC_004668.1	3UTR	-	2540031	2540060	ID=NC_004668.1_utr3_190;Name=3'UTR_00190;associated_term=NA;associated_gene=EF2627;associated_cds=NP_816266.1;length=29;Parent=NC_004668.1_transcript1756	29
NC_004668.1	3UTR	-	2746673	2746703	ID=NC_004668.1_utr3_216;Name=3'UTR_00216;associated_term=NA;associated_gene=EF2864;associated_cds=NP_816486.1;length=30;Parent=NC_004668.1_transcript1912	30
NC_004668.1	3UTR	+	1882779	1882813	ID=NC_004668.1_utr3_144;Name=3'UTR_00144;associated_term=NA;associated_gene=EF1941;associated_cds=NP_815621.1;length=34;Parent=NC_004668.1_transcript1331	34
NC_004668.1	3UTR	-	2555233	2555267	ID=NC_004668.1_utr3_191;Name=3'UTR_00191;associated_term=NA;associated_gene=EF2643;associated_cds=NP_816281.1;length=34;Parent=NC_004668.1_transcript1770	34
NC_004668.1	3UTR	+	1397986	1398021	ID=NC_004668.1_utr3_109;Name=3'UTR_00109;associated_term=NA;associated_gene=EF1416;associated_cds=NP_815137.1;length=35;Parent=NC_004668.1_transcript1020	35
NC_004668.1	3UTR	-	2702556	2702591	ID=NC_004668.1_utr3_210;Name=3'UTR_00210;associated_term=NA;associated_gene=EF2801;associated_cds=NP_816426.1;length=35;Parent=NC_004668.1_transcript1888	35
NC_004670.1	3UTR	+	9287	9322	ID=NC_004670.1_utr3_288;Name=3'UTR_00288;associated_term=NA;associated_gene=EF_C0007;associated_cds=NP_817009.1;length=35;Parent=NC_004670.1_transcript2323	35
NC_004668.1	3UTR	+	94478	94518	ID=NC_004668.1_utr3_8;Name=3'UTR_00008;associated_term=NA;associated_gene=EF0091;associated_cds=NP_813894.1;length=40;Parent=NC_004668.1_transcript66	40
NC_004668.1	3UTR	+	681451	681492	ID=NC_004668.1_utr3_54;Name=3'UTR_00054;associated_term=NA;associated_gene=EF0723;associated_cds=NP_814473.1;length=41;Parent=NC_004668.1_transcript549	41
NC_004668.1	3UTR	-	572876	572918	ID=NC_004668.1_utr3_46;Name=3'UTR_00046;associated_term=NA;associated_gene=EF0610;associated_cds=NP_814368.1;length=42;Parent=NC_004668.1_transcript460	42
NC_004668.1	3UTR	+	2736808	2736854	ID=NC_004668.1_utr3_213;Name=3'UTR_00213;associated_term=NA;associated_gene=EF2855;associated_cds=NP_816477.1;length=46;Parent=NC_004668.1_transcript1902	46
NC_004668.1	3UTR	+	51425	51472	ID=NC_004668.1_utr3_3;Name=3'UTR_00003;associated_term=NA;associated_gene=EF0048;associated_cds=NP_813858.1;length=47;Parent=NC_004668.1_transcript31	47
NC_004668.1	3UTR	+	769958	770005	ID=NC_004668.1_utr3_61;Name=3'UTR_00061;associated_term=NA;associated_gene=EF0809;associated_cds=NP_814552.1;length=47;Parent=NC_004668.1_transcript617	47
NC_004668.1	3UTR	+	1506808	1506855	ID=NC_004668.1_utr3_118;Name=3'UTR_00118;associated_term=NA;associated_gene=EF1552;associated_cds=NP_815269.1;length=47;Parent=NC_004668.1_transcript1089	47
NC_004668.1	3UTR	-	1866948	1866995	ID=NC_004668.1_utr3_143;Name=3'UTR_00143;associated_term=NA;associated_gene=EF1925;associated_cds=NP_815606.1;length=47;Parent=NC_004668.1_transcript1318	47
NC_004668.1	3UTR	-	2437075	2437123	ID=NC_004668.1_utr3_178;Name=3'UTR_00178;associated_term=NA;associated_gene=EF2512;associated_cds=NP_816155.1;length=48;Parent=NC_004668.1_transcript1701	48
NC_004668.1	3UTR	-	2754357	2754405	ID=NC_004668.1_utr3_217;Name=3'UTR_00217;associated_term=NA;associated_gene=EF2875;associated_cds=NP_816495.1;length=48;Parent=NC_004668.1_transcript1916	48
NC_004669.1	3UTR	-	44574	44622	ID=NC_004669.1_utr3_280;Name=3'UTR_00280;associated_term=NA;associated_gene=EFA0056;associated_cds=NP_816979.1;length=48;Parent=NC_004669.1_transcript2277	48
NC_004668.1	3UTR	-	2796638	2796687	ID=NC_004668.1_utr3_225;Name=3'UTR_00225;associated_term=NA;associated_gene=EF2919;associated_cds=NP_816537.1;length=49;Parent=NC_004668.1_transcript1937	49
NC_004668.1	3UTR	+	3031663	3031712	ID=NC_004668.1_utr3_255;Name=3'UTR_00255;associated_term=NA;associated_gene=EF3158;associated_cds=NP_816764.1;length=49;Parent=NC_004668.1_transcript2108	49
NC_004668.1	3UTR	+	1475854	1475906	ID=NC_004668.1_utr3_111;Name=3'UTR_00111;associated_term=NA;associated_gene=EF1519;associated_cds=NP_815239.1;length=52;Parent=NC_004668.1_transcript1064	52
NC_004668.1	3UTR	-	2694030	2694084	ID=NC_004668.1_utr3_208;Name=3'UTR_00208;associated_term=NA;associated_gene=EF2792;associated_cds=NP_816418.1;length=54;Parent=NC_004668.1_transcript1873	54
NC_004668.1	3UTR	-	2736857	2736911	ID=NC_004668.1_utr3_214;Name=3'UTR_00214;associated_term=NA;associated_gene=EF2856;associated_cds=NP_816478.1;length=54;Parent=NC_004668.1_transcript1903	54
NC_004668.1	3UTR	-	2821903	2821957	ID=NC_004668.1_utr3_231;Name=3'UTR_00231;associated_term=NA;associated_gene=EF2947;associated_cds=NP_816565.1;length=54;Parent=NC_004668.1_transcript1962	54
NC_004670.1	3UTR	+	2142	2196	ID=NC_004670.1_utr3_287;Name=3'UTR_00287;associated_term=NA;associated_gene=EF_C0002;associated_cds=NP_817005.1;length=54;Parent=NC_004670.1_transcript2317	54
NC_004668.1	3UTR	-	2058260	2058315	ID=NC_004668.1_utr3_158;Name=3'UTR_00158;associated_term=NA;associated_gene=EF2154;associated_cds=NP_815817.1;length=55;Parent=NC_004668.1_transcript1465	55
NC_004668.1	3UTR	+	239859	239917	ID=NC_004668.1_utr3_23;Name=3'UTR_00023;associated_term=NA;associated_gene=EF0262;associated_cds=NP_814056.1;length=58;Parent=NC_004668.1_transcript162	58
NC_004668.1	3UTR	+	1524530	1524590	ID=NC_004668.1_utr3_120;Name=3'UTR_00120;associated_term=NA;associated_gene=EF1572;associated_cds=NP_815289.1;length=60;Parent=NC_004668.1_transcript1098	60
NC_004668.1	3UTR	+	721485	721548	ID=NC_004668.1_utr3_58;Name=3'UTR_00058;associated_term=NA;associated_gene=EF0762;associated_cds=NP_814509.1;length=63;Parent=NC_004668.1_transcript576	63
NC_004668.1	3UTR	+	686080	686144	ID=NC_004668.1_utr3_55;Name=3'UTR_00055;associated_term=NA;associated_gene=EF0727;associated_cds=NP_814477.1;length=64;Parent=NC_004668.1_transcript551	64
NC_004668.1	3UTR	+	1170121	1170185	ID=NC_004668.1_utr3_95;Name=3'UTR_00095;associated_term=NA;associated_gene=EF1204;associated_cds=NP_814933.1;length=64;Parent=NC_004668.1_transcript884	64
NC_004668.1	3UTR	+	809241	809310	ID=NC_004668.1_utr3_64;Name=3'UTR_00064;associated_term=NA;associated_gene=EF0850;associated_cds=NP_814592.1;length=69;Parent=NC_004668.1_transcript640	69
NC_004668.1	3UTR	+	329096	329166	ID=NC_004668.1_utr3_30;Name=3'UTR_00030;associated_term=NA;associated_gene=EF0360;associated_cds=NP_814152.1;length=70;Parent=NC_004668.1_transcript227	70
NC_004668.1	3UTR	+	1103488	1103558	ID=NC_004668.1_utr3_89;Name=3'UTR_00089;associated_term=NA;associated_gene=EF1130;associated_cds=NP_814860.1;length=70;Parent=NC_004668.1_transcript837	70
NC_004668.1	3UTR	+	527171	527242	ID=NC_004668.1_utr3_43;Name=3'UTR_00043;associated_term=NA;associated_gene=EF0569;associated_cds=NP_814335.1;length=71;Parent=NC_004668.1_transcript405	71
NC_004668.1	3UTR	-	1634794	1634867	ID=NC_004668.1_utr3_126;Name=3'UTR_00126;associated_term=NA;associated_gene=EF1684;associated_cds=NP_815392.1;length=73;Parent=NC_004668.1_transcript1168	73
NC_004668.1	3UTR	-	1925346	1925423	ID=NC_004668.1_utr3_151;Name=3'UTR_00151;associated_term=NA;associated_gene=EF1991;associated_cds=NP_815666.1;length=77;Parent=NC_004668.1_transcript1363	77
NC_004668.1	3UTR	+	2869300	2869379	ID=NC_004668.1_utr3_233;Name=3'UTR_00233;associated_term=NA;associated_gene=EF2995;associated_cds=NP_816611.1;length=79;Parent=NC_004668.1_transcript1988	79
NC_004668.1	3UTR	-	1309904	1309986	ID=NC_004668.1_utr3_104;Name=3'UTR_00104;associated_term=NA;associated_gene=EF1340;associated_cds=NP_815061.1;length=82;Parent=NC_004668.1_transcript972	82
NC_004668.1	3UTR	-	2329187	2329272	ID=NC_004668.1_utr3_169;Name=3'UTR_00169;associated_term=NA;associated_gene=EF2408;associated_cds=NP_816057.1;length=85;Parent=NC_004668.1_transcript1631	85
NC_004668.1	3UTR	-	2570738	2570825	ID=NC_004668.1_utr3_195;Name=3'UTR_00195;associated_term=NA;associated_gene=EF2659;associated_cds=NP_816297.1;length=87;Parent=NC_004668.1_transcript1781	87
NC_004668.1	3UTR	-	2764468	2764555	ID=NC_004668.1_utr3_218;Name=3'UTR_00218;associated_term=NA;associated_gene=EF2888;associated_cds=NP_816507.1;length=87;Parent=NC_004668.1_transcript1918	87
NC_004668.1	3UTR	+	1676858	1676947	ID=NC_004668.1_utr3_130;Name=3'UTR_00130;associated_term=NA;associated_gene=EF1726;associated_cds=NP_815431.1;length=89;Parent=NC_004668.1_transcript1191	89
NC_004668.1	3UTR	-	3133821	3133910	ID=NC_004668.1_utr3_269;Name=3'UTR_00269;associated_term=NA;associated_gene=EF3256;associated_cds=NP_816853.1;length=89;Parent=NC_004668.1_transcript2184	89
NC_004668.1	3UTR	-	267469	267559	ID=NC_004668.1_utr3_26;Name=3'UTR_00026;associated_term=NA;associated_gene=EF0282;associated_cds=NP_814074.1;length=90;Parent=NC_004668.1_transcript181	90
NC_004668.1	3UTR	+	1195501	1195593	ID=NC_004668.1_utr3_97;Name=3'UTR_00097;associated_term=NA;associated_gene=EF1227;associated_cds=NP_814954.1;length=92;Parent=NC_004668.1_transcript896	92
NC_004668.1	3UTR	+	280012	280107	ID=NC_004668.1_utr3_28;Name=3'UTR_00028;associated_term=NA;associated_gene=EF0294;associated_cds=NP_814086.1;length=95;Parent=NC_004668.1_transcript188	95
NC_004668.1	3UTR	+	910217	910312	ID=NC_004668.1_utr3_73;Name=3'UTR_00073;associated_term=NA;associated_gene=EF0944;associated_cds=NP_814682.1;length=95;Parent=NC_004668.1_transcript712	95
NC_004668.1	3UTR	-	2508592	2508693	ID=NC_004668.1_utr3_185;Name=3'UTR_00185;associated_term=NA;associated_gene=EF2591;associated_cds=NP_816232.1;length=101;Parent=NC_004668.1_transcript1737	101
NC_004668.1	3UTR	-	1658830	1658934	ID=NC_004668.1_utr3_128;Name=3'UTR_00128;associated_term=NA;associated_gene=EF1710;associated_cds=NP_815416.1;length=104;Parent=NC_004668.1_transcript1188	104
NC_004668.1	3UTR	+	738663	738768	ID=NC_004668.1_utr3_59;Name=3'UTR_00059;associated_term=NA;associated_gene=EF0780;associated_cds=NP_814525.1;length=105;Parent=NC_004668.1_transcript587	105
NC_004668.1	3UTR	-	1950668	1950785	ID=NC_004668.1_utr3_152;Name=3'UTR_00152;associated_term=NA;associated_gene=EF2022;associated_cds=NP_815691.1;length=117;Parent=NC_004668.1_transcript1380	117
NC_004668.1	3UTR	+	3137062	3137180	ID=NC_004668.1_utr3_270;Name=3'UTR_00270;associated_term=NA;associated_gene=EF3257;associated_cds=NP_816854.1;length=118;Parent=NC_004668.1_transcript2186	118
NC_004668.1	3UTR	-	1075164	1075288	ID=NC_004668.1_utr3_88;Name=3'UTR_00088;associated_term=NA;associated_gene=EF1105;associated_cds=NP_814835.1;length=124;Parent=NC_004668.1_transcript830	124
NC_004669.1	3UTR	+	9035	9161	ID=NC_004669.1_utr3_278;Name=3'UTR_00278;associated_term=NA;associated_gene=EFA0010;associated_cds=NP_816940.1;length=126;Parent=NC_004669.1_transcript2241	126
NC_004668.1	3UTR	-	125963	126108	ID=NC_004668.1_utr3_13;Name=3'UTR_00013;associated_term=NA;associated_gene=EF0122;associated_cds=NP_813925.1;length=145;Parent=NC_004668.1_transcript87	145
NC_004668.1	3UTR	-	1632541	1632686	ID=NC_004668.1_utr3_125;Name=3'UTR_00125;associated_term=NA;associated_gene=EF1681;associated_cds=NP_815389.1;length=145;Parent=NC_004668.1_transcript1165	145
NC_004669.1	3UTR	-	7431	7583	ID=NC_004669.1_utr3_277;Name=3'UTR_00277;associated_term=NA;associated_gene=EFA0009;associated_cds=NP_816939.1;length=152;Parent=NC_004669.1_transcript2237	152
NC_004668.1	3UTR	-	2535131	2535295	ID=NC_004668.1_utr3_189;Name=3'UTR_00189;associated_term=NA;associated_gene=EF2622;associated_cds=NP_816261.1;length=164;Parent=NC_004668.1_transcript1752	164
NC_004668.1	3UTR	-	2994739	2994908	ID=NC_004668.1_utr3_250;Name=3'UTR_00250;associated_term=NA;associated_gene=EF3120;associated_cds=NP_816730.1;length=169;Parent=NC_004668.1_transcript2086	169
NC_004668.1	3UTR	+	2961775	2961963	ID=NC_004668.1_utr3_242;Name=3'UTR_00242;associated_term=NA;associated_gene=EF3086;associated_cds=NP_816697.1;length=188;Parent=NC_004668.1_transcript2057	188
NC_004668.1	3UTR	+	521085	521290	ID=NC_004668.1_utr3_41;Name=3'UTR_00041;associated_term=NA;associated_gene=EF0562;associated_cds=NP_814329.1;length=205;Parent=NC_004668.1_transcript401	205
NC_004668.1	3UTR	+	47433	47672	ID=NC_004668.1_utr3_2;Name=3'UTR_00002;associated_term=NA;associated_gene=EF0043;associated_cds=NP_813853.1;length=239;Parent=NC_004668.1_transcript29	239
NC_004669.1	3UTR	-	64846	65104	ID=NC_004669.1_utr3_286;Name=3'UTR_00286;associated_term=NA;associated_gene=EFA0083;associated_cds=NP_817003.1;length=258;Parent=NC_004669.1_transcript2313	258
NC_004669.1	3UTR	-	58487	58746	ID=NC_004669.1_utr3_283;Name=3'UTR_00283;associated_term=NA;associated_gene=EFA0072;associated_cds=NP_816993.1;length=259;Parent=NC_004669.1_transcript2300	259
NC_004668.1	3UTR	-	113758	114026	ID=NC_004668.1_utr3_11;Name=3'UTR_00011;associated_term=NA;associated_gene=EF0110;associated_cds=NP_813913.1;length=268;Parent=NC_004668.1_transcript78	268
NC_004668.1	3UTR	-	348384	348663	ID=NC_004668.1_utr3_32;Name=3'UTR_00032;associated_term=NA;associated_gene=EF0380;associated_cds=NP_814170.1;length=279;Parent=NC_004668.1_transcript244	279
NC_004668.1	3UTR	-	2817004	2817287	ID=NC_004668.1_utr3_229;Name=3'UTR_00229;associated_term=NA;associated_gene=EF2936;associated_cds=NP_816554.1;length=283;Parent=NC_004668.1_transcript1955	283
NC_004668.1	3UTR	+	522419	522703	ID=NC_004668.1_utr3_42;Name=3'UTR_00042;associated_term=NA;associated_gene=EF0566;associated_cds=NP_814332.1;length=284;Parent=NC_004668.1_transcript402	284
NC_004668.1	3UTR	-	2102810	2103109	ID=NC_004668.1_utr3_160;Name=3'UTR_00160;associated_term=NA;associated_gene=EF2187;associated_cds=NP_815849.1;length=299;Parent=NC_004668.1_transcript1490	299

## Sheet: E. faecalis V583 with RIT
Table S5. 3'UTRs detected for expressed mRNAs - E. faecalis
This table lists all 3'UTRs in E. faecalis V583 that have a predicted Rho-independent terminator
Genome accession number	Feature	Strand	TSS(-strand)/CDS(+strand)	TSS(+strand)/CDS(-strand)	Additional info	UTR length
NC_004668.1	3UTR	+	879244	879249	ID=NC_004668.1_utr3_122;Name=3'UTR_00122;length=5;associated_cds=NP_814650.1	5
NC_004668.1	3UTR	-	2935280	2935289	ID=NC_004668.1_utr3_425;Name=3'UTR_00425;length=-9;associated_cds=NP_816676.1	9
NC_004668.1	3UTR	-	1764715	1764728	ID=NC_004668.1_utr3_261;Name=3'UTR_00261;length=-13;associated_cds=NP_815517.1	13
NC_004668.1	3UTR	+	847876	847903	ID=NC_004668.1_utr3_118;Name=3'UTR_00118;length=27;associated_cds=NP_814622.1	27
NC_004668.1	3UTR	-	2462841	2462868	ID=NC_004668.1_utr3_344;Name=3'UTR_00344;length=-27;associated_cds=NP_816191.1	27
NC_004668.1	3UTR	+	1045363	1045391	ID=NC_004668.1_utr3_148;Name=3'UTR_00148;length=28;associated_cds=NP_814804.1	28
NC_004668.1	3UTR	-	1766857	1766885	ID=NC_004668.1_utr3_262;Name=3'UTR_00262;length=-28;associated_cds=NP_815519.1	28
NC_004668.1	3UTR	-	1643058	1643089	ID=NC_004668.1_utr3_245;Name=3'UTR_00245;length=-31;associated_cds=NP_815401.1	31
NC_004668.1	3UTR	-	189589	189621	ID=NC_004668.1_utr3_23;Name=3'UTR_00023;length=-32;associated_cds=NP_813995.1	32
NC_004668.1	3UTR	+	246215	246247	ID=NC_004668.1_utr3_34;Name=3'UTR_00034;length=32;associated_cds=NP_814061.1	32
NC_004668.1	3UTR	-	641516	641548	ID=NC_004668.1_utr3_81;Name=3'UTR_00081;length=-32;associated_cds=NP_814436.1	32
NC_004668.1	3UTR	+	932300	932332	ID=NC_004668.1_utr3_132;Name=3'UTR_00132;length=32;associated_cds=NP_814707.1	32
NC_004668.1	3UTR	-	1230322	1230354	ID=NC_004668.1_utr3_181;Name=3'UTR_00181;length=-32;associated_cds=NP_814987.1	32
NC_004669.1	3UTR	-	51991	52023	ID=NC_004669.1_utr3_484;Name=3'UTR_00484;length=-32;associated_cds=NP_816986.1	32
NC_004668.1	3UTR	-	224949	224982	ID=NC_004668.1_utr3_31;Name=3'UTR_00031;length=-33;associated_cds=NP_814043.1	33
NC_004668.1	3UTR	-	2556089	2556122	ID=NC_004668.1_utr3_361;Name=3'UTR_00361;length=-33;associated_cds=NP_816282.1	33
NC_004668.1	3UTR	+	1292870	1292904	ID=NC_004668.1_utr3_190;Name=3'UTR_00190;length=34;associated_cds=NP_815045.1	34
NC_004668.1	3UTR	-	2928576	2928610	ID=NC_004668.1_utr3_423;Name=3'UTR_00423;length=-34;associated_cds=NP_816667.1	34
NC_004668.1	3UTR	+	1505461	1505496	ID=NC_004668.1_utr3_226;Name=3'UTR_00226;length=35;associated_cds=NP_815267.1	35
NC_004668.1	3UTR	-	2381957	2381992	ID=NC_004668.1_utr3_335;Name=3'UTR_00335;length=-35;associated_cds=NP_816109.1	35
NC_004668.1	3UTR	+	2695595	2695630	ID=NC_004668.1_utr3_387;Name=3'UTR_00387;length=35;associated_cds=NP_816419.1	35
NC_004668.1	3UTR	+	1281565	1281601	ID=NC_004668.1_utr3_186;Name=3'UTR_00186;length=36;associated_cds=NP_815035.1	36
NC_004668.1	3UTR	+	1115745	1115782	ID=NC_004668.1_utr3_169;Name=3'UTR_00169;length=37;associated_cds=NP_814876.1	37
NC_004668.1	3UTR	-	2791666	2791703	ID=NC_004668.1_utr3_407;Name=3'UTR_00407;length=-37;associated_cds=NP_816532.1	37
NC_004668.1	3UTR	-	1709076	1709114	ID=NC_004668.1_utr3_257;Name=3'UTR_00257;length=-38;associated_cds=NP_815465.1	38
NC_004668.1	3UTR	-	3041523	3041561	ID=NC_004668.1_utr3_450;Name=3'UTR_00450;length=-38;associated_cds=NP_816773.1	38
NC_004668.1	3UTR	-	2979522	2979561	ID=NC_004668.1_utr3_435;Name=3'UTR_00435;length=-39;associated_cds=NP_816715.1	39
NC_004668.1	3UTR	+	1496169	1496209	ID=NC_004668.1_utr3_221;Name=3'UTR_00221;length=40;associated_cds=NP_815258.1	40
NC_004668.1	3UTR	+	654991	655032	ID=NC_004668.1_utr3_83;Name=3'UTR_00083;length=41;associated_cds=NP_814451.1	41
NC_004668.1	3UTR	-	1343708	1343749	ID=NC_004668.1_utr3_199;Name=3'UTR_00199;length=-41;associated_cds=NP_815088.1	41
NC_004668.1	3UTR	-	2222813	2222854	ID=NC_004668.1_utr3_316;Name=3'UTR_00316;length=-41;associated_cds=NP_815962.1	41
NC_004668.1	3UTR	-	2463205	2463246	ID=NC_004668.1_utr3_345;Name=3'UTR_00345;length=-41;associated_cds=NP_816192.1	41
NC_004668.1	3UTR	-	477325	477367	ID=NC_004668.1_utr3_62;Name=3'UTR_00062;length=-42;associated_cds=NP_814295.1	42
NC_004668.1	3UTR	+	739097	739139	ID=NC_004668.1_utr3_101;Name=3'UTR_00101;length=42;associated_cds=NP_814526.1	42
NC_004668.1	3UTR	-	3021325	3021367	ID=NC_004668.1_utr3_444;Name=3'UTR_00444;length=-42;associated_cds=NP_816756.1	42
NC_004668.1	3UTR	+	10528	10571	ID=NC_004668.1_utr3_0;Name=3'UTR_00000;length=43;associated_cds=NP_813822.1	43
NC_004668.1	3UTR	+	1512927	1512970	ID=NC_004668.1_utr3_227;Name=3'UTR_00227;length=43;associated_cds=NP_815277.1	43
NC_004668.1	3UTR	-	2652154	2652197	ID=NC_004668.1_utr3_381;Name=3'UTR_00381;length=-43;associated_cds=NP_816373.1	43
NC_004668.1	3UTR	+	701060	701104	ID=NC_004668.1_utr3_92;Name=3'UTR_00092;length=44;associated_cds=NP_814492.1	44
NC_004668.1	3UTR	+	1105715	1105759	ID=NC_004668.1_utr3_165;Name=3'UTR_00165;length=44;associated_cds=NP_814863.1	44
NC_004668.1	3UTR	+	1479272	1479316	ID=NC_004668.1_utr3_217;Name=3'UTR_00217;length=44;associated_cds=NP_815241.1	44
NC_004668.1	3UTR	-	2313944	2313988	ID=NC_004668.1_utr3_324;Name=3'UTR_00324;length=-44;associated_cds=NP_816041.1	44
NC_004668.1	3UTR	+	664606	664651	ID=NC_004668.1_utr3_87;Name=3'UTR_00087;length=45;associated_cds=NP_814461.1	45
NC_004668.1	3UTR	-	1987614	1987660	ID=NC_004668.1_utr3_298;Name=3'UTR_00298;length=-46;associated_cds=NP_815728.1	46
NC_004668.1	3UTR	+	2211966	2212012	ID=NC_004668.1_utr3_313;Name=3'UTR_00313;length=46;associated_cds=NP_815948.1	46
NC_004668.1	3UTR	-	2335638	2335684	ID=NC_004668.1_utr3_328;Name=3'UTR_00328;length=-46;associated_cds=NP_816064.1	46
NC_004668.1	3UTR	+	2400390	2400436	ID=NC_004668.1_utr3_339;Name=3'UTR_00339;length=46;associated_cds=NP_816124.1	46
NC_004668.1	3UTR	+	79828	79875	ID=NC_004668.1_utr3_12;Name=3'UTR_00012;length=47;associated_cds=NP_813886.1	47
NC_004668.1	3UTR	+	367217	367264	ID=NC_004668.1_utr3_48;Name=3'UTR_00048;length=47;associated_cds=NP_814183.1	47
NC_004668.1	3UTR	-	1832960	1833007	ID=NC_004668.1_utr3_264;Name=3'UTR_00264;length=-47;associated_cds=NP_815572.1	47
NC_004668.1	3UTR	-	1992078	1992125	ID=NC_004668.1_utr3_299;Name=3'UTR_00299;length=-47;associated_cds=NP_815734.1	47
NC_004668.1	3UTR	+	52437	52485	ID=NC_004668.1_utr3_10;Name=3'UTR_00010;length=48;associated_cds=NP_813860.1	48
NC_004668.1	3UTR	-	1566758	1566806	ID=NC_004668.1_utr3_236;Name=3'UTR_00236;length=-48;associated_cds=NP_815324.1	48
NC_004668.1	3UTR	-	2370684	2370732	ID=NC_004668.1_utr3_333;Name=3'UTR_00333;length=-48;associated_cds=NP_816101.1	48
NC_004668.1	3UTR	-	2804165	2804213	ID=NC_004668.1_utr3_413;Name=3'UTR_00413;length=-48;associated_cds=NP_816545.1	48
NC_004668.1	3UTR	-	3077154	3077202	ID=NC_004668.1_utr3_458;Name=3'UTR_00458;length=-48;associated_cds=NP_816809.1	48
NC_004668.1	3UTR	+	3174177	3174225	ID=NC_004668.1_utr3_475;Name=3'UTR_00475;length=48;associated_cds=NP_816887.1	48
NC_004668.1	3UTR	-	1567779	1567828	ID=NC_004668.1_utr3_237;Name=3'UTR_00237;length=-49;associated_cds=NP_815325.1	49
NC_004668.1	3UTR	-	1575893	1575942	ID=NC_004668.1_utr3_239;Name=3'UTR_00239;length=-49;associated_cds=NP_815329.1	49
NC_004668.1	3UTR	-	2469060	2469109	ID=NC_004668.1_utr3_347;Name=3'UTR_00347;length=-49;associated_cds=NP_816198.1	49
NC_004668.1	3UTR	-	2986081	2986130	ID=NC_004668.1_utr3_437;Name=3'UTR_00437;length=-49;associated_cds=NP_816721.1	49
NC_004668.1	3UTR	-	2262763	2262814	ID=NC_004668.1_utr3_318;Name=3'UTR_00318;length=-51;associated_cds=NP_815996.1	51
NC_004668.1	3UTR	-	2792392	2792443	ID=NC_004668.1_utr3_408;Name=3'UTR_00408;length=-51;associated_cds=NP_816533.1	51
NC_004668.1	3UTR	+	1220489	1220541	ID=NC_004668.1_utr3_180;Name=3'UTR_00180;length=52;associated_cds=NP_814977.1	52
NC_004668.1	3UTR	-	1700971	1701023	ID=NC_004668.1_utr3_256;Name=3'UTR_00256;length=-52;associated_cds=NP_815457.1	52
NC_004668.1	3UTR	+	815458	815511	ID=NC_004668.1_utr3_111;Name=3'UTR_00111;length=53;associated_cds=NP_814599.1	53
NC_004668.1	3UTR	-	3101141	3101194	ID=NC_004668.1_utr3_462;Name=3'UTR_00462;length=-53;associated_cds=NP_816831.1	53
NC_004668.1	3UTR	-	164311	164365	ID=NC_004668.1_utr3_20;Name=3'UTR_00020;length=-54;associated_cds=NP_813969.1	54
NC_004668.1	3UTR	-	3020279	3020333	ID=NC_004668.1_utr3_443;Name=3'UTR_00443;length=-54;associated_cds=NP_816755.1	54
NC_004671.1	3UTR	+	50172	50226	ID=NC_004671.1_utr3_495;Name=3'UTR_00495;length=54;associated_cds=NP_817075.1	54
NC_004668.1	3UTR	+	289330	289385	ID=NC_004668.1_utr3_41;Name=3'UTR_00041;length=55;associated_cds=NP_814094.1	55
NC_004668.1	3UTR	+	431603	431658	ID=NC_004668.1_utr3_54;Name=3'UTR_00054;length=55;associated_cds=NP_814247.1	55
NC_004668.1	3UTR	-	3003183	3003238	ID=NC_004668.1_utr3_440;Name=3'UTR_00440;length=-55;associated_cds=NP_816735.1	55
NC_004668.1	3UTR	+	244147	244203	ID=NC_004668.1_utr3_33;Name=3'UTR_00033;length=56;associated_cds=NP_814059.1	56
NC_004668.1	3UTR	+	563132	563188	ID=NC_004668.1_utr3_71;Name=3'UTR_00071;length=56;associated_cds=NP_814358.1	56
NC_004668.1	3UTR	+	1148407	1148463	ID=NC_004668.1_utr3_172;Name=3'UTR_00172;length=56;associated_cds=NP_814909.1	56
NC_004668.1	3UTR	+	1153640	1153696	ID=NC_004668.1_utr3_174;Name=3'UTR_00174;length=56;associated_cds=NP_814914.1	56
NC_004668.1	3UTR	+	1293462	1293518	ID=NC_004668.1_utr3_193;Name=3'UTR_00193;length=56;associated_cds=NP_815046.1	56
NC_004668.1	3UTR	-	1683168	1683224	ID=NC_004668.1_utr3_251;Name=3'UTR_00251;length=-56;associated_cds=NP_815438.1	56
NC_004668.1	3UTR	-	2628508	2628564	ID=NC_004668.1_utr3_373;Name=3'UTR_00373;length=-56;associated_cds=NP_816348.1	56
NC_004668.1	3UTR	+	1487450	1487507	ID=NC_004668.1_utr3_220;Name=3'UTR_00220;length=57;associated_cds=NP_815248.1	57
NC_004668.1	3UTR	-	2776576	2776633	ID=NC_004668.1_utr3_402;Name=3'UTR_00402;length=-57;associated_cds=NP_816516.1	57
NC_004668.1	3UTR	+	2802999	2803056	ID=NC_004668.1_utr3_411;Name=3'UTR_00411;length=57;associated_cds=NP_816542.1	57
NC_004668.1	3UTR	-	3078308	3078365	ID=NC_004668.1_utr3_459;Name=3'UTR_00459;length=-57;associated_cds=NP_816810.1	57
NC_004668.1	3UTR	+	1361915	1361973	ID=NC_004668.1_utr3_204;Name=3'UTR_00204;length=58;associated_cds=NP_815103.1	58
NC_004668.1	3UTR	-	1842995	1843053	ID=NC_004668.1_utr3_265;Name=3'UTR_00265;length=-58;associated_cds=NP_815580.1	58
NC_004668.1	3UTR	+	420493	420552	ID=NC_004668.1_utr3_51;Name=3'UTR_00051;length=59;associated_cds=NP_814234.1	59
NC_004668.1	3UTR	+	1142333	1142393	ID=NC_004668.1_utr3_171;Name=3'UTR_00171;length=60;associated_cds=NP_814901.1	60
NC_004668.1	3UTR	-	3025385	3025445	ID=NC_004668.1_utr3_446;Name=3'UTR_00446;length=-60;associated_cds=NP_816760.1	60
NC_004668.1	3UTR	+	1351309	1351370	ID=NC_004668.1_utr3_200;Name=3'UTR_00200;length=61;associated_cds=NP_815095.1	61
NC_004668.1	3UTR	-	1761996	1762058	ID=NC_004668.1_utr3_260;Name=3'UTR_00260;length=-62;associated_cds=NP_815515.1	62
NC_004668.1	3UTR	-	2789052	2789114	ID=NC_004668.1_utr3_406;Name=3'UTR_00406;length=-62;associated_cds=NP_816529.1	62
NC_004668.1	3UTR	-	2931926	2931988	ID=NC_004668.1_utr3_424;Name=3'UTR_00424;length=-62;associated_cds=NP_816672.1	62
NC_004668.1	3UTR	+	2941999	2942061	ID=NC_004668.1_utr3_428;Name=3'UTR_00428;length=62;associated_cds=NP_816682.1	62
NC_004668.1	3UTR	+	1013546	1013610	ID=NC_004668.1_utr3_143;Name=3'UTR_00143;length=64;associated_cds=NP_814781.1	64
NC_004668.1	3UTR	-	2781201	2781265	ID=NC_004668.1_utr3_404;Name=3'UTR_00404;length=-64;associated_cds=NP_816521.1	64
NC_004669.1	3UTR	+	60110	60174	ID=NC_004669.1_utr3_487;Name=3'UTR_00487;length=64;associated_cds=NP_816995.1	64
NC_004668.1	3UTR	+	270283	270348	ID=NC_004668.1_utr3_36;Name=3'UTR_00036;length=65;associated_cds=NP_814076.1	65
NC_004668.1	3UTR	+	1049444	1049509	ID=NC_004668.1_utr3_151;Name=3'UTR_00151;length=65;associated_cds=NP_814810.1	65
NC_004668.1	3UTR	+	1181577	1181642	ID=NC_004668.1_utr3_178;Name=3'UTR_00178;length=65;associated_cds=NP_814941.1	65
NC_004668.1	3UTR	+	1503454	1503519	ID=NC_004668.1_utr3_224;Name=3'UTR_00224;length=65;associated_cds=NP_815265.1	65
NC_004668.1	3UTR	-	1283181	1283247	ID=NC_004668.1_utr3_188;Name=3'UTR_00188;length=-66;associated_cds=NP_815037.1	66
NC_004668.1	3UTR	-	2640748	2640814	ID=NC_004668.1_utr3_374;Name=3'UTR_00374;length=-66;associated_cds=NP_816361.1	66
NC_004668.1	3UTR	-	2989696	2989762	ID=NC_004668.1_utr3_438;Name=3'UTR_00438;length=-66;associated_cds=NP_816724.1	66
NC_004668.1	3UTR	-	2534559	2534626	ID=NC_004668.1_utr3_356;Name=3'UTR_00356;length=-67;associated_cds=NP_816259.1	67
NC_004668.1	3UTR	-	3100055	3100122	ID=NC_004668.1_utr3_461;Name=3'UTR_00461;length=-67;associated_cds=NP_816829.1	67
NC_004668.1	3UTR	+	70310	70378	ID=NC_004668.1_utr3_11;Name=3'UTR_00011;length=68;associated_cds=NP_813875.1	68
NC_004668.1	3UTR	+	1064006	1064074	ID=NC_004668.1_utr3_155;Name=3'UTR_00155;length=68;associated_cds=NP_814823.1	68
NC_004668.1	3UTR	-	2668633	2668701	ID=NC_004668.1_utr3_383;Name=3'UTR_00383;length=-68;associated_cds=NP_816388.1	68
NC_004668.1	3UTR	+	131554	131623	ID=NC_004668.1_utr3_18;Name=3'UTR_00018;length=69;associated_cds=NP_813929.1	69
NC_004668.1	3UTR	+	914321	914390	ID=NC_004668.1_utr3_130;Name=3'UTR_00130;length=69;associated_cds=NP_814687.1	69
NC_004668.1	3UTR	+	945014	945083	ID=NC_004668.1_utr3_137;Name=3'UTR_00137;length=69;associated_cds=NP_814723.1	69
NC_004668.1	3UTR	+	926949	927020	ID=NC_004668.1_utr3_131;Name=3'UTR_00131;length=71;associated_cds=NP_814701.1	71
NC_004668.1	3UTR	+	2732711	2732782	ID=NC_004668.1_utr3_393;Name=3'UTR_00393;length=71;associated_cds=NP_816469.1	71
NC_004668.1	3UTR	+	1384324	1384396	ID=NC_004668.1_utr3_206;Name=3'UTR_00206;length=72;associated_cds=NP_815126.1	72
NC_004668.1	3UTR	-	1464549	1464621	ID=NC_004668.1_utr3_215;Name=3'UTR_00215;length=-72;associated_cds=NP_815231.1	72
NC_004668.1	3UTR	-	783462	783535	ID=NC_004668.1_utr3_104;Name=3'UTR_00104;length=-73;associated_cds=NP_814563.1	73
NC_004668.1	3UTR	-	2523874	2523947	ID=NC_004668.1_utr3_354;Name=3'UTR_00354;length=-73;associated_cds=NP_816246.1	73
NC_004668.1	3UTR	+	2642081	2642156	ID=NC_004668.1_utr3_375;Name=3'UTR_00375;length=75;associated_cds=NP_816363.1	75
NC_004668.1	3UTR	-	3044396	3044471	ID=NC_004668.1_utr3_452;Name=3'UTR_00452;length=-75;associated_cds=NP_816775.1	75
NC_004668.1	3UTR	+	3048272	3048347	ID=NC_004668.1_utr3_453;Name=3'UTR_00453;length=75;associated_cds=NP_816777.1	75
NC_004668.1	3UTR	+	117297	117373	ID=NC_004668.1_utr3_17;Name=3'UTR_00017;length=76;associated_cds=NP_813916.1	76
NC_004668.1	3UTR	+	541483	541560	ID=NC_004668.1_utr3_69;Name=3'UTR_00069;length=77;associated_cds=NP_814344.1	77
NC_004668.1	3UTR	-	2116421	2116498	ID=NC_004668.1_utr3_310;Name=3'UTR_00310;length=-77;associated_cds=NP_815865.1	77
NC_004668.1	3UTR	+	2688624	2688702	ID=NC_004668.1_utr3_385;Name=3'UTR_00385;length=78;associated_cds=NP_816410.1	78
NC_004668.1	3UTR	+	195705	195785	ID=NC_004668.1_utr3_24;Name=3'UTR_00024;length=80;associated_cds=NP_814000.1	80
NC_004668.1	3UTR	-	2968214	2968295	ID=NC_004668.1_utr3_433;Name=3'UTR_00433;length=-81;associated_cds=NP_816705.1	81
NC_004668.1	3UTR	+	621975	622057	ID=NC_004668.1_utr3_77;Name=3'UTR_00077;length=82;associated_cds=NP_814421.1	82
NC_004668.1	3UTR	+	703702	703784	ID=NC_004668.1_utr3_93;Name=3'UTR_00093;length=82;associated_cds=NP_814495.1	82
NC_004668.1	3UTR	+	1886444	1886527	ID=NC_004668.1_utr3_278;Name=3'UTR_00278;length=83;associated_cds=NP_815626.1	83
NC_004668.1	3UTR	-	1677977	1678062	ID=NC_004668.1_utr3_250;Name=3'UTR_00250;length=-85;associated_cds=NP_815434.1	85
NC_004668.1	3UTR	-	2463922	2464007	ID=NC_004668.1_utr3_346;Name=3'UTR_00346;length=-85;associated_cds=NP_816193.1	85
NC_004668.1	3UTR	-	2589452	2589537	ID=NC_004668.1_utr3_369;Name=3'UTR_00369;length=-85;associated_cds=NP_816313.1	85
NC_004668.1	3UTR	-	2927795	2927880	ID=NC_004668.1_utr3_422;Name=3'UTR_00422;length=-85;associated_cds=NP_816666.1	85
NC_004668.1	3UTR	+	1055452	1055538	ID=NC_004668.1_utr3_154;Name=3'UTR_00154;length=86;associated_cds=NP_814819.1	86
NC_004668.1	3UTR	+	1443843	1443929	ID=NC_004668.1_utr3_210;Name=3'UTR_00210;length=86;associated_cds=NP_815207.1	86
NC_004668.1	3UTR	+	2361972	2362059	ID=NC_004668.1_utr3_331;Name=3'UTR_00331;length=87;associated_cds=NP_816091.1	87
NC_004668.1	3UTR	-	2646298	2646386	ID=NC_004668.1_utr3_378;Name=3'UTR_00378;length=-88;associated_cds=NP_816368.1	88
NC_004668.1	3UTR	-	2803016	2803105	ID=NC_004668.1_utr3_412;Name=3'UTR_00412;length=-89;associated_cds=NP_816543.1	89
NC_004668.1	3UTR	-	3217344	3217433	ID=NC_004668.1_utr3_480;Name=3'UTR_00480;length=-89;associated_cds=NP_816928.1	89
NC_004668.1	3UTR	+	1065714	1065804	ID=NC_004668.1_utr3_156;Name=3'UTR_00156;length=90;associated_cds=NP_814826.1	90
NC_004668.1	3UTR	+	840486	840577	ID=NC_004668.1_utr3_116;Name=3'UTR_00116;length=91;associated_cds=NP_814616.1	91
NC_004668.1	3UTR	+	1918267	1918358	ID=NC_004668.1_utr3_285;Name=3'UTR_00285;length=91;associated_cds=NP_815656.1	91
NC_004668.1	3UTR	-	2742073	2742164	ID=NC_004668.1_utr3_398;Name=3'UTR_00398;length=-91;associated_cds=NP_816482.1	91
NC_004668.1	3UTR	-	106130	106222	ID=NC_004668.1_utr3_14;Name=3'UTR_00014;length=-92;associated_cds=NP_813905.1	92
NC_004668.1	3UTR	-	2927050	2927142	ID=NC_004668.1_utr3_421;Name=3'UTR_00421;length=-92;associated_cds=NP_816665.1	92
NC_004668.1	3UTR	+	113258	113351	ID=NC_004668.1_utr3_16;Name=3'UTR_00016;length=93;associated_cds=NP_813911.1	93
NC_004668.1	3UTR	+	175613	175707	ID=NC_004668.1_utr3_21;Name=3'UTR_00021;length=94;associated_cds=NP_813980.1	94
NC_004668.1	3UTR	-	1897858	1897956	ID=NC_004668.1_utr3_280;Name=3'UTR_00280;length=-98;associated_cds=NP_815637.1	98
NC_004668.1	3UTR	+	471815	471916	ID=NC_004668.1_utr3_60;Name=3'UTR_00060;length=101;associated_cds=NP_814287.1	101
NC_004668.1	3UTR	-	2305834	2305935	ID=NC_004668.1_utr3_321;Name=3'UTR_00321;length=-101;associated_cds=NP_816030.1	101
NC_004668.1	3UTR	+	3123633	3123734	ID=NC_004668.1_utr3_467;Name=3'UTR_00467;length=101;associated_cds=NP_816846.1	101
NC_004668.1	3UTR	+	2992345	2992448	ID=NC_004668.1_utr3_439;Name=3'UTR_00439;length=103;associated_cds=NP_816726.1	103
NC_004668.1	3UTR	-	661970	662075	ID=NC_004668.1_utr3_85;Name=3'UTR_00085;length=-105;associated_cds=NP_814458.1	105
NC_004668.1	3UTR	-	2579933	2580038	ID=NC_004668.1_utr3_366;Name=3'UTR_00366;length=-105;associated_cds=NP_816305.1	105
NC_004668.1	3UTR	-	1919064	1919170	ID=NC_004668.1_utr3_286;Name=3'UTR_00286;length=-106;associated_cds=NP_815659.1	106
NC_004668.1	3UTR	-	828699	828808	ID=NC_004668.1_utr3_114;Name=3'UTR_00114;length=-109;associated_cds=NP_814610.1	109
NC_004668.1	3UTR	+	3118946	3119055	ID=NC_004668.1_utr3_466;Name=3'UTR_00466;length=109;associated_cds=NP_816844.1	109
NC_004669.1	3UTR	+	64175	64285	ID=NC_004669.1_utr3_489;Name=3'UTR_00489;length=110;associated_cds=NP_817001.1	110
NC_004668.1	3UTR	-	2787850	2787961	ID=NC_004668.1_utr3_405;Name=3'UTR_00405;length=-111;associated_cds=NP_816527.1	111
NC_004668.1	3UTR	-	2962273	2962391	ID=NC_004668.1_utr3_431;Name=3'UTR_00431;length=-118;associated_cds=NP_816699.1	118
NC_004668.1	3UTR	+	81630	81749	ID=NC_004668.1_utr3_13;Name=3'UTR_00013;length=119;associated_cds=NP_813888.1	119
NC_004668.1	3UTR	-	1692134	1692253	ID=NC_004668.1_utr3_253;Name=3'UTR_00253;length=-119;associated_cds=NP_815447.1	119
NC_004668.1	3UTR	+	3082900	3083023	ID=NC_004668.1_utr3_460;Name=3'UTR_00460;length=123;associated_cds=NP_816815.1	123
NC_004668.1	3UTR	-	2961831	2961957	ID=NC_004668.1_utr3_430;Name=3'UTR_00430;length=-126;associated_cds=NP_816698.1	126
NC_004668.1	3UTR	-	3177749	3177877	ID=NC_004668.1_utr3_476;Name=3'UTR_00476;length=-128;associated_cds=NP_816890.1	128
NC_004668.1	3UTR	+	588692	588828	ID=NC_004668.1_utr3_73;Name=3'UTR_00073;length=136;associated_cds=NP_814387.1	136
NC_004668.1	3UTR	-	2937451	2937590	ID=NC_004668.1_utr3_426;Name=3'UTR_00426;length=-139;associated_cds=NP_816677.1	139
NC_004668.1	3UTR	-	2051398	2051540	ID=NC_004668.1_utr3_305;Name=3'UTR_00305;length=-142;associated_cds=NP_815812.1	142
NC_004668.1	3UTR	+	785933	786078	ID=NC_004668.1_utr3_106;Name=3'UTR_00106;length=145;associated_cds=NP_814564.1	145
NC_004669.1	3UTR	+	53567	53712	ID=NC_004669.1_utr3_485;Name=3'UTR_00485;length=145;associated_cds=NP_816988.1	145
NC_004668.1	3UTR	-	421352	421500	ID=NC_004668.1_utr3_52;Name=3'UTR_00052;length=-148;associated_cds=NP_814236.1	148
NC_004668.1	3UTR	-	3066619	3066767	ID=NC_004668.1_utr3_457;Name=3'UTR_00457;length=-148;associated_cds=NP_816796.1	148
NC_004668.1	3UTR	-	2821008	2821157	ID=NC_004668.1_utr3_416;Name=3'UTR_00416;length=-149;associated_cds=NP_816563.1	149
NC_004668.1	3UTR	+	1277814	1277972	ID=NC_004668.1_utr3_185;Name=3'UTR_00185;length=158;associated_cds=NP_815032.1	158
NC_004669.1	3UTR	+	13665	13830	ID=NC_004669.1_utr3_482;Name=3'UTR_00482;length=165;associated_cds=NP_816946.1	165
NC_004668.1	3UTR	+	212740	212906	ID=NC_004668.1_utr3_29;Name=3'UTR_00029;length=166;associated_cds=NP_814031.1	166
NC_004668.1	3UTR	+	2733479	2733646	ID=NC_004668.1_utr3_394;Name=3'UTR_00394;length=167;associated_cds=NP_816472.1	167
NC_004668.1	3UTR	-	3157342	3157526	ID=NC_004668.1_utr3_472;Name=3'UTR_00472;length=-184;associated_cds=NP_816879.1	184
NC_004668.1	3UTR	-	1974318	1974512	ID=NC_004668.1_utr3_296;Name=3'UTR_00296;length=-194;associated_cds=NP_815718.1	194
NC_004668.1	3UTR	-	2420898	2421096	ID=NC_004668.1_utr3_342;Name=3'UTR_00342;length=-198;associated_cds=NP_816142.1	198
NC_004668.1	3UTR	+	3140201	3140399	ID=NC_004668.1_utr3_471;Name=3'UTR_00471;length=198;associated_cds=NP_816859.1	198
NC_004668.1	3UTR	+	2403411	2403631	ID=NC_004668.1_utr3_340;Name=3'UTR_00340;length=220;associated_cds=NP_816127.1	220
NC_004668.1	3UTR	-	1923192	1923422	ID=NC_004668.1_utr3_287;Name=3'UTR_00287;length=-230;associated_cds=NP_815664.1	230
NC_004671.1	3UTR	+	52877	53114	ID=NC_004671.1_utr3_496;Name=3'UTR_00496;length=237;associated_cds=NP_817077.1	237
NC_004668.1	3UTR	-	481109	481349	ID=NC_004668.1_utr3_63;Name=3'UTR_00063;length=-240;associated_cds=NP_814299.1	240
NC_004668.1	3UTR	+	1066586	1066878	ID=NC_004668.1_utr3_157;Name=3'UTR_00157;length=292;associated_cds=NP_814827.1	292
