# Supplementary material for: Single-Nucleotide RNA Maps for the Two Major Nosocomial Pathogens Enterococcus faecalis and Enterococcus faecium
Source: Front Cell Infect Microbiol. 2020 Nov 25;10:600325. doi: 10.3389/fcimb.2020.600325 (PMC7724050; doi:10.3389/fcimb.2020.600325)
Supplement: Supplementary Table 6 — Predicted rho -dependent and independent terminators. [file Table_6.xlsx]

## Sheet: E. faecium AUS0004 all
Table S5. Predicted rho-independent terminators
This table lists all rho-independent terminators predicted by TransTermHP and/or ANNOgesic for E. faecium AUS0004
Genome	Name	Start	End	Strand	Detect	Associated_gene	Associated_transcript	Coverage_decrease	Avg_coverage:ID-005244-0054_1_-TEX_forward/ID-005244-0054_1_-TEX_reverse	Avg_coverage:ID-005245-0054_2_-TEX_forward/ID-005245-0054_2_-TEX_reverse	Avg_coverage:ID-005246-0054_3_-TEX_forward/ID-005246-0054_3_-TEX_reverse	Avg_coverage:ID-005278-0054_1_+TEX_forward/ID-005278-0054_1_+TEX_reverse	Avg_coverage:ID-005279-0054_2_+TEX_forward/ID-005279-0054_2_+TEX_reverse	Avg_coverage:ID-005280-0054_3_+TEX_forward/ID-005280-0054_3_+TEX_reverse
NC_017022.1	terminator_00000	8701	8745	+	TransTermHP	EFAU004_RS00030	NC_017022.1_transcript5	TRUE	diff=8,0;high=14,0;low=6,0	diff=8,0;high=14,0;low=6,0	diff=8,0;high=15,0;low=7,0	diff=12,0;high=22,0;low=10,0	diff=19,0;high=34,0;low=15,0	diff=11,0;high=18,0;low=7,0
NC_017022.1	terminator_00001	10048	10088	+	TransTermHP	EFAU004_RS00045	NC_017022.1_transcript9	TRUE	diff=45,0;high=87,0;low=42,0	diff=57,0;high=112,0;low=55,0	diff=73,0;high=137,0;low=64,0	diff=49,0;high=95,0;low=46,0	diff=39,0;high=74,0;low=35,0	diff=54,0;high=102,0;low=48,0
NC_017022.1	terminator_00002	12954	12977	+	TransTermHP	EFAU004_RS00065	NC_017022.1_transcript15	FALSE	Not_detect	Not_detect	Not_detect	Not_detect	Not_detect	Not_detect
NC_017022.1	terminator_00003	16710	16740	+	TransTermHP	EFAU004_RS00080	NC_017022.1_transcript18	TRUE	diff=6,0;high=8,0;low=2,0	diff=10,0;high=16,0;low=6,0	diff=8,0;high=11,0;low=3,0	diff=7,0;high=12,0;low=5,0	diff=5,0;high=9,0;low=4,0	diff=2,0;high=3,0;low=1,0
NC_017022.1	terminator_00004	21641	21664	+	gene_converged	transcript_00025	NC_017022.1_transcript25	TRUE	diff=138,0142857147;high=224,872619048;low=86,8583333333	diff=141,11309523800003;high=280,613095238;low=139,5	diff=252,238095238;high=470,888095238;low=218,65	diff=12089,138492099999;high=22302,4373016;low=10213,2988095	diff=9385,41111107;high=17516,581746;low=8131,17063493	diff=12782,3781747;high=24984,9222223;low=12202,5440476
NC_017022.1	terminator_00005	25762	25805	+	TransTermHP	EFAU004_RS00115	NC_017022.1_transcript30	FALSE	Not_detect	Not_detect	Not_detect	Not_detect	Not_detect	Not_detect
NC_017022.1	terminator_00006	28663	28705	+	gene_converged;TransTermHP	EFAU004_RS00125	NC_017022.1_transcript33	TRUE	diff=2,0;high=3,0;low=1,0	diff=2,0;high=2,0;low=0,0	diff=1,0;high=1,0;low=0,0	diff=5,333333333300001;high=10,3333333333;low=5,0	diff=4,33333333333;high=7,33333333333;low=3,0	diff=5,20833333333;high=7,33333333333;low=2,125
NC_017022.1	terminator_00007	32641	32671	+	TransTermHP	EFAU004_RS00150	NC_017022.1_transcript39	TRUE	diff=15,0;high=26,0;low=11,0	diff=12,0;high=23,0;low=11,0	diff=12,0;high=18,0;low=6,0	diff=9,0;high=15,0;low=6,0	diff=2,0;high=3,0;low=1,0	diff=4,0;high=7,0;low=3,0
NC_017022.1	terminator_00008	43927	43960	-	gene_converged	transcript_00054	NC_017022.1_transcript54	TRUE	Not_detect	diff=1,0;high=1,0;low=0,0	diff=1,0;high=1,0;low=0,0	diff=14,0;high=17,0;low=3,0	diff=26,0;high=46,0;low=20,0	diff=31,0;high=54,0;low=23,0
NC_017022.1	terminator_00009	49470	49493	-	gene_converged	transcript_00063	NC_017022.1_transcript63	TRUE	diff=14,788095238099999;high=28,2320512821;low=13,443956044	diff=19,4652014652;high=35,6956043956;low=16,2304029304	diff=24,0925824176;high=46,7891025641;low=22,6965201465	diff=999,4642857130001;high=1756,14157509;low=756,677289377	diff=736,121428567;high=1331,79935897;low=595,677930403	diff=930,5261904749999;high=1686,40128205;low=755,875091575
NC_017022.1	terminator_00010	51114	51149	+	gene_converged;TransTermHP	EFAU004_RS00225	NC_017022.1_transcript66	TRUE	diff=2,0;high=2,0;low=0,0	diff=3,0;high=5,0;low=2,0	diff=4,0;high=7,0;low=3,0	diff=17,0;high=33,0;low=16,0	diff=12,0;high=22,0;low=10,0	diff=22,0;high=37,0;low=15,0
NC_017022.1	terminator_00011	56889	56912	+	TransTermHP	EFAU004_RS00265	NC_017022.1_transcript73	FALSE	Not_detect	Not_detect	Not_detect	Not_detect	Not_detect	Not_detect
NC_017022.1	terminator_00012	58157	58193	+	gene_converged;TransTermHP	transcript_00077,EFAU004_RS00275	NC_017022.1_transcript77	FALSE	Not_detect	Not_detect	Not_detect	Not_detect	Not_detect	Not_detect
NC_017022.1	terminator_00013	68650	68686	-	gene_converged;TransTermHP	transcript_00083,EFAU004_RS00320	NC_017022.1_transcript83	TRUE	diff=7,0;high=13,0;low=6,0	diff=6,0;high=11,0;low=5,0	diff=7,0;high=12,0;low=5,0	diff=7,0;high=12,0;low=5,0	diff=5,0;high=9,0;low=4,0	diff=5,0;high=9,0;low=4,0
NC_017022.1	terminator_00014	73194	73223	+	TransTermHP	EFAU004_RS00345	NC_017022.1_transcript87	TRUE	Not_detect	diff=7,0;high=13,0;low=6,0	diff=10,0;high=18,0;low=8,0	diff=4,0;high=7,0;low=3,0	diff=7,0;high=13,0;low=6,0	diff=5,0;high=6,0;low=1,0
NC_017022.1	terminator_00015	74436	74478	-	TransTermHP	EFAU004_RS00355	NC_017022.1_transcript89	TRUE	diff=80,0;high=147,0;low=67,0	diff=107,0;high=188,0;low=81,0	diff=77,0;high=150,0;low=73,0	diff=81,0;high=145,0;low=64,0	diff=71,0;high=138,0;low=67,0	diff=68,0;high=130,0;low=62,0
NC_017022.1	terminator_00016	77897	77934	+	TransTermHP	EFAU004_RS00365	NC_017022.1_transcript92	TRUE	diff=18,0;high=22,0;low=4,0	diff=11,0;high=21,0;low=10,0	diff=18,0;high=24,0;low=6,0	diff=1018,0;high=1022,0;low=4,0	diff=754,0;high=759,0;low=5,0	diff=836,0;high=840,0;low=4,0
NC_017022.1	terminator_00017	79219	79245	+	TransTermHP	EFAU004_RS00370	NA	TRUE	Not_detect	diff=1,0;high=1,0;low=0,0	diff=1,0;high=1,0;low=0,0	diff=15,0;high=15,0;low=0,0	diff=6,0;high=6,0;low=0,0	diff=6,0;high=7,0;low=1,0
NC_017022.1	terminator_00018	82882	82919	+	TransTermHP	EFAU004_RS00390	NC_017022.1_transcript97	TRUE	diff=3,0;high=4,0;low=1,0	diff=8,0;high=13,0;low=5,0	diff=4,0;high=4,0;low=0,0	diff=3,0;high=5,0;low=2,0	diff=2,0;high=3,0;low=1,0	Not_detect
NC_017022.1	terminator_00019	86742	86787	+	TransTermHP	EFAU004_RS00405	NC_017022.1_transcript99	TRUE	diff=43,0;high=46,0;low=3,0	diff=18,0;high=35,0;low=17,0	diff=20,0;high=22,0;low=2,0	diff=13,0;high=24,0;low=11,0	diff=9,0;high=17,0;low=8,0	diff=8,0;high=15,0;low=7,0
NC_017022.1	terminator_00020	89609	89631	+	gene_converged	EFAU004_RS00420	NC_017022.1_transcript102	TRUE	diff=16,0;high=30,0;low=14,0	diff=12,0;high=23,0;low=11,0	diff=10,0;high=19,0;low=9,0	diff=10,0;high=17,0;low=7,0	diff=7,0;high=13,0;low=6,0	diff=6,0;high=11,0;low=5,0
NC_017022.1	terminator_00021	89807	89848	-	gene_converged;TransTermHP	gpmA	NC_017022.1_transcript103	TRUE	diff=8,0;high=14,0;low=6,0	diff=17,0;high=31,0;low=14,0	diff=8,0;high=15,0;low=7,0	diff=6,0;high=10,0;low=4,0	diff=12,0;high=20,0;low=8,0	diff=5,0;high=9,0;low=4,0
NC_017022.1	terminator_00022	90681	90705	-	TransTermHP	EFAU004_RS00430	NC_017022.1_transcript104	TRUE	diff=5,0;high=9,0;low=4,0	diff=8,0;high=12,0;low=4,0	diff=11,0;high=16,0;low=5,0	diff=8,0;high=10,0;low=2,0	diff=4,0;high=6,0;low=2,0	diff=4,0;high=7,0;low=3,0
NC_017022.1	terminator_00023	96985	97020	+	TransTermHP	EFAU004_RS00455	NC_017022.1_transcript105	TRUE	diff=47,0;high=87,0;low=40,0	diff=69,0;high=132,0;low=63,0	diff=70,0;high=136,0;low=66,0	diff=42,0;high=82,0;low=40,0	diff=65,0;high=112,0;low=47,0	diff=59,0;high=111,0;low=52,0
NC_017022.1	terminator_00024	107943	107991	+	TransTermHP	EFAU004_RS00565	NC_017022.1_transcript106	TRUE	Not_detect	diff=139,0;high=274,0;low=135,0	Not_detect	diff=89,0;high=173,0;low=84,0	Not_detect	diff=64,0;high=123,0;low=59,0
NC_017022.1	terminator_00025	108781	108802	+	TransTermHP	EFAU004_RS00570	NC_017022.1_transcript106	TRUE	Not_detect	diff=397,0;high=785,0;low=388,0	Not_detect	diff=30225,0;high=30546,0;low=321,0	diff=22059,0;high=22283,0;low=224,0	diff=29623,0;high=29905,0;low=282,0
NC_017022.1	terminator_00026	111576	111633	+	TransTermHP	EFAU004_RS00600	NC_017022.1_transcript106	TRUE	diff=11,0;high=20,0;low=9,0	diff=17,0;high=33,0;low=16,0	diff=34,0;high=49,0;low=15,0	diff=44,0;high=85,0;low=41,0	diff=30,0;high=55,0;low=25,0	diff=32,0;high=62,0;low=30,0
NC_017022.1	terminator_00027	114270	114297	+	TransTermHP	EFAU004_RS00615	NC_017022.1_transcript109	TRUE	diff=11,0;high=20,0;low=9,0	diff=10,0;high=17,0;low=7,0	diff=14,0;high=27,0;low=13,0	diff=11,0;high=21,0;low=10,0	diff=11,0;high=19,0;low=8,0	diff=9,0;high=17,0;low=8,0
NC_017022.1	terminator_00028	115400	115461	-	gene_converged;TransTermHP	transcript_00110,EFAU004_RS00625	NC_017022.1_transcript110	TRUE	diff=18,0;high=34,0;low=16,0	diff=21,0;high=41,0;low=20,0	diff=16,0;high=31,0;low=15,0	diff=18,0;high=35,0;low=17,0	diff=16,0;high=31,0;low=15,0	diff=15,0;high=28,0;low=13,0
NC_017022.1	terminator_00029	118283	118316	-	gene_converged	transcript_00112,EFAU004_RS14880	NC_017022.1_transcript112	TRUE	diff=13,0;high=20,0;low=7,0	diff=11,0;high=21,0;low=10,0	diff=15,0;high=28,0;low=13,0	diff=70,428571429;high=122,428571429;low=52,0	diff=55,0;high=83,0;low=28,0	diff=69,0;high=131,0;low=62,0
NC_017022.1	terminator_00030	120974	121014	+	TransTermHP	EFAU004_RS00640	NC_017022.1_transcript113	TRUE	diff=34,0;high=66,0;low=32,0	diff=41,0;high=79,0;low=38,0	diff=48,0;high=95,0;low=47,0	diff=26,0;high=45,0;low=19,0	diff=28,0;high=54,0;low=26,0	diff=18,0;high=34,0;low=16,0
NC_017022.1	terminator_00031	124513	124548	+	TransTermHP	EFAU004_RS00655	NC_017022.1_transcript116	FALSE	Not_detect	Not_detect	Not_detect	Not_detect	Not_detect	Not_detect
NC_017022.1	terminator_00032	130436	130462	+	TransTermHP	EFAU004_RS00680	NC_017022.1_transcript117	FALSE	Not_detect	Not_detect	Not_detect	Not_detect	Not_detect	Not_detect
NC_017022.1	terminator_00033	136896	136933	+	gene_converged;TransTermHP	transcript_00120,EFAU004_RS00700	NC_017022.1_transcript120	TRUE	diff=10,0;high=16,0;low=6,0	diff=19,0;high=30,0;low=11,0	diff=18,0;high=35,0;low=17,0	diff=21,0;high=38,0;low=17,0	diff=23,0;high=43,0;low=20,0	diff=14,0;high=23,0;low=9,0
NC_017022.1	terminator_00034	139339	139427	+	gene_converged;TransTermHP	EFAU004_RS00705	NC_017022.1_transcript123	TRUE	diff=4,0;high=6,0;low=2,0	diff=4,0;high=6,0;low=2,0	diff=4,0;high=7,0;low=3,0	diff=6,0;high=11,0;low=5,0	diff=2,0;high=3,0;low=1,0	diff=2,0;high=3,0;low=1,0
NC_017022.1	terminator_00035	144166	144190	-	gene_converged	EFAU004_RS00735	NC_017022.1_transcript128	TRUE	diff=6,5;high=12,0;low=5,5	diff=10,0;high=19,0;low=9,0	diff=20,0;high=36,0;low=16,0	diff=2,0;high=3,0;low=1,0	diff=8,0;high=14,0;low=6,0	diff=12,0;high=23,0;low=11,0
NC_017022.1	terminator_00036	146277	146307	+	TransTermHP	EFAU004_RS00745	NC_017022.1_transcript130	TRUE	diff=28,0;high=53,0;low=25,0	diff=42,0;high=79,0;low=37,0	diff=28,0;high=52,0;low=24,0	diff=69,0;high=102,0;low=33,0	diff=67,5;high=97,5;low=30,0	diff=46,0;high=63,0;low=17,0
NC_017022.1	terminator_00037	151661	151687	-	gene_converged	transcript_00136	NC_017022.1_transcript136	TRUE	diff=10,18333333336;high=19,1777777778;low=8,99444444444	diff=14,05;high=26,6333333333;low=12,5833333333	diff=18,2777777778;high=36,0666666667;low=17,7888888889	diff=1267,517676764;high=2099,67323232;low=832,155555556	diff=0,333333333334;high=0,555555555556;low=0,222222222222	diff=1256,4060606009998;high=2117,04494949;low=860,638888889
NC_017022.1	terminator_00038	154003	154019	-	gene_converged	transcript_00139	NC_017022.1_transcript139	FALSE	Not_detect	Not_detect	Not_detect	Not_detect	Not_detect	Not_detect
NC_017022.1	terminator_00039	155028	155053	+	gene_converged	transcript_00140	NC_017022.1_transcript140	TRUE	diff=14,788095238099999;high=28,5415750916;low=13,7534798535	diff=19,2509157509;high=35,6956043956;low=16,4446886447	diff=24,5175824176;high=46,6641025641;low=22,1465201465	diff=1021,2190476179999;high=1784,61062271;low=763,391575092	diff=753,0154761890001;high=1353,61602564;low=600,600549451	diff=951,1571428569999;high=1713,27032967;low=762,113186813
NC_017022.1	terminator_00040	155070	155126	-	gene_converged;TransTermHP	EFAU004_RS00790	NC_017022.1_transcript141	TRUE	diff=13,0;high=20,0;low=7,0	diff=8,0;high=10,0;low=2,0	diff=15,0;high=20,0;low=5,0	diff=16,0;high=28,0;low=12,0	diff=8,0;high=15,0;low=7,0	diff=11,0;high=17,0;low=6,0
NC_017022.1	terminator_00041	160792	160836	-	TransTermHP	EFAU004_RS00825	NC_017022.1_transcript150	FALSE	Not_detect	Not_detect	Not_detect	Not_detect	Not_detect	Not_detect
NC_017022.1	terminator_00042	160793	160835	+	gene_converged;TransTermHP	EFAU004_RS00820	NC_017022.1_transcript149	TRUE	diff=5,0;high=6,0;low=1,0	diff=1,0;high=1,0;low=0,0	diff=2,0;high=2,0;low=0,0	diff=4,0;high=6,0;low=2,0	diff=5,0;high=6,0;low=1,0	diff=12,0;high=14,0;low=2,0
NC_017022.1	terminator_00043	161475	161500	-	TransTermHP	EFAU004_RS00830	NC_017022.1_transcript151	TRUE	diff=13,0;high=24,0;low=11,0	diff=12,0;high=22,0;low=10,0	diff=19,25;high=33,25;low=14,0	diff=23,0;high=40,0;low=17,0	diff=19,0;high=34,0;low=15,0	diff=25,0;high=47,0;low=22,0
NC_017022.1	terminator_00044	164745	164784	+	gene_converged	EFAU004_RS00845	NC_017022.1_transcript154	TRUE	diff=9,0;high=16,0;low=7,0	diff=11,0;high=21,0;low=10,0	diff=10,0;high=19,0;low=9,0	Not_detect	diff=7,0;high=12,0;low=5,0	diff=6,0;high=11,0;low=5,0
NC_017022.1	terminator_00045	171634	171696	+	gene_converged;TransTermHP	EFAU004_RS00870	NC_017022.1_transcript156	TRUE	diff=5,0;high=8,0;low=3,0	diff=2,0;high=2,0;low=0,0	diff=6,0;high=10,0;low=4,0	diff=4,0;high=7,0;low=3,0	diff=8,0;high=14,0;low=6,0	diff=5,0;high=7,0;low=2,0
NC_017022.1	terminator_00046	175183	175220	+	TransTermHP	EFAU004_RS00885	NC_017022.1_transcript159	TRUE	diff=2,0;high=2,0;low=0,0	diff=3,0;high=5,0;low=2,0	diff=8,0;high=14,0;low=6,0	diff=8,0;high=14,0;low=6,0	diff=9,0;high=17,0;low=8,0	diff=7,0;high=12,0;low=5,0
NC_017022.1	terminator_00047	178872	178884	+	TransTermHP	EFAU004_RS00910	NC_017022.1_transcript162	TRUE	diff=24,0;high=40,0;low=16,0	diff=21,5;high=32,5;low=11,0	diff=47,0;high=60,0;low=13,0	Not_detect	Not_detect	Not_detect
NC_017022.1	terminator_00048	180347	180395	+	gene_converged;TransTermHP	transcript_00164	NC_017022.1_transcript164	TRUE	Not_detect	diff=2,0;high=2,0;low=0,0	diff=3,0;high=5,0;low=2,0	diff=22,0;high=43,0;low=21,0	diff=22,0;high=31,0;low=9,0	diff=21,0;high=28,0;low=7,0
NC_017022.1	terminator_00049	180473	180495	-	gene_converged	transcript_00165,EFAU004_RS00920	NC_017022.1_transcript165	TRUE	diff=12,0;high=22,0;low=10,0	diff=7,0;high=13,0;low=6,0	diff=9,0;high=16,0;low=7,0	diff=7,0;high=13,0;low=6,0	diff=4,16666666667;high=8,16666666667;low=4,0	diff=4,0;high=6,0;low=2,0
NC_017022.1	terminator_00050	182689	182735	-	gene_converged	EFAU004_RS00930	NC_017022.1_transcript168	TRUE	diff=12,0;high=20,0;low=8,0	diff=7,0;high=12,0;low=5,0	diff=10,0;high=17,0;low=7,0	diff=12,0;high=18,0;low=6,0	diff=22,0;high=23,0;low=1,0	diff=11,0;high=13,0;low=2,0
NC_017022.1	terminator_00051	184235	184258	-	TransTermHP	EFAU004_RS00935	NC_017022.1_transcript169	TRUE	diff=11,0;high=18,0;low=7,0	diff=13,0;high=24,0;low=11,0	diff=9,0;high=17,0;low=8,0	diff=21,0;high=39,0;low=18,0	diff=21,0;high=38,0;low=17,0	diff=11,0;high=19,0;low=8,0
NC_017022.1	terminator_00052	191103	191124	+	TransTermHP	EFAU004_RS00975	NC_017022.1_transcript180	TRUE	diff=69,0;high=137,0;low=68,0	diff=89,0;high=174,0;low=85,0	diff=69,0;high=129,0;low=60,0	diff=69,0;high=132,0;low=63,0	diff=57,0;high=111,0;low=54,0	diff=55,0;high=107,0;low=52,0
NC_017022.1	terminator_00053	193562	193584	-	gene_converged	transcript_00182	NC_017022.1_transcript182	TRUE	diff=1,0;high=1,0;low=0,0	Not_detect	diff=1,0;high=1,0;low=0,0	diff=24,027027027;high=24,027027027;low=0,0	diff=12,000000000033;high=12,1666666667;low=0,166666666667	diff=24,0;high=24,0;low=0,0
NC_017022.1	terminator_00054	197846	197887	+	gene_converged;TransTermHP	EFAU004_RS00995	NC_017022.1_transcript186	TRUE	diff=2,0;high=3,0;low=1,0	diff=3,0;high=4,0;low=1,0	diff=5,0;high=8,0;low=3,0	diff=47,0;high=48,0;low=1,0	diff=47,5;high=50,0;low=2,5	diff=35,0;high=37,0;low=2,0
NC_017022.1	terminator_00055	199450	199483	-	TransTermHP	EFAU004_RS01005	NC_017022.1_transcript188	TRUE	diff=16,0;high=26,0;low=10,0	diff=26,0;high=48,0;low=22,0	diff=24,0;high=47,0;low=23,0	diff=19,0;high=34,0;low=15,0	diff=20,0;high=36,0;low=16,0	diff=18,0;high=34,0;low=16,0
NC_017022.1	terminator_00056	200118	200158	-	TransTermHP	EFAU004_RS01010	NC_017022.1_transcript189	TRUE	diff=60,0;high=112,0;low=52,0	diff=115,0;high=225,0;low=110,0	diff=86,0;high=155,0;low=69,0	diff=108,0;high=196,0;low=88,0	diff=130,0;high=243,0;low=113,0	diff=119,0;high=206,0;low=87,0
NC_017022.1	terminator_00057	203281	203304	+	gene_converged	EFAU004_RS01025	NC_017022.1_transcript191	TRUE	diff=9,0;high=16,0;low=7,0	diff=10,0;high=18,0;low=8,0	diff=20,0;high=38,0;low=18,0	diff=8,0;high=15,0;low=7,0	diff=9,0;high=12,0;low=3,0	diff=7,0;high=10,0;low=3,0
NC_017022.1	terminator_00058	203283	203304	-	gene_converged	transcript_00192	NC_017022.1_transcript192	TRUE	diff=3,0;high=4,0;low=1,0	diff=1,0;high=1,0;low=0,0	diff=0,999999999999;high=1,11111111111;low=0,111111111111	diff=47,0;high=47,5;low=0,5	diff=33,0;high=33,25;low=0,25	diff=29,0;high=32,25;low=3,25
NC_017022.1	terminator_00059	206471	206500	+	TransTermHP	EFAU004_RS01040	NC_017022.1_transcript197	TRUE	diff=53,0;high=104,0;low=51,0	diff=71,0;high=137,0;low=66,0	diff=54,0;high=103,0;low=49,0	diff=137,0;high=270,0;low=133,0	diff=143,0;high=281,0;low=138,0	diff=148,0;high=269,0;low=121,0
NC_017022.1	terminator_00060	208601	208627	-	gene_converged	transcript_00201,EFAU004_RS01055	NC_017022.1_transcript201	TRUE	diff=12,0;high=23,0;low=11,0	diff=8,0;high=14,0;low=6,0	diff=11,0;high=21,0;low=10,0	Not_detect	diff=7,0;high=12,0;low=5,0	diff=3,0;high=4,0;low=1,0
NC_017022.1	terminator_00061	211712	211745	+	TransTermHP	EFAU004_RS01060	NC_017022.1_transcript204	TRUE	diff=38,0;high=73,0;low=35,0	diff=34,0;high=64,0;low=30,0	diff=41,0;high=79,0;low=38,0	diff=23,0;high=38,0;low=15,0	diff=16,0;high=28,0;low=12,0	diff=21,0;high=40,0;low=19,0
NC_017022.1	terminator_00062	213327	213347	+	TransTermHP	EFAU004_RS01065	NC_017022.1_transcript206	TRUE	diff=967,0;high=1199,0;low=232,0	diff=983,0;high=1204,0;low=221,0	diff=1131,0;high=1416,0;low=285,0	diff=58734,0;high=70552,0;low=11818,0	diff=38636,0;high=46984,0;low=8348,0	diff=51046,0;high=61310,0;low=10264,0
NC_017022.1	terminator_00063	215034	215078	+	TransTermHP	EFAU004_RS01070	NC_017022.1_transcript206	FALSE	Not_detect	Not_detect	Not_detect	Not_detect	Not_detect	Not_detect
NC_017022.1	terminator_00064	218632	218674	+	TransTermHP	EFAU004_RS01095	NC_017022.1_transcript210	TRUE	diff=28,0;high=54,0;low=26,0	diff=32,0;high=60,0;low=28,0	diff=21,0;high=34,0;low=13,0	diff=17,0;high=28,0;low=11,0	diff=15,0;high=25,0;low=10,0	diff=15,0;high=24,0;low=9,0
NC_017022.1	terminator_00065	224053	224103	+	gene_converged;TransTermHP	EFAU004_RS01105	NC_017022.1_transcript214	FALSE	Not_detect	Not_detect	Not_detect	Not_detect	Not_detect	Not_detect
NC_017022.1	terminator_00066	231279	231321	+	gene_converged;TransTermHP	transcript_00223,EFAU004_RS01150	NC_017022.1_transcript223	TRUE	diff=15,0;high=29,0;low=14,0	diff=5,0;high=8,0;low=3,0	diff=12,0;high=22,0;low=10,0	diff=25,0;high=44,0;low=19,0	diff=33,0;high=46,0;low=13,0	diff=17,0;high=29,0;low=12,0
NC_017022.1	terminator_00067	234466	234514	+	gene_converged	EFAU004_RS01155	NC_017022.1_transcript226	FALSE	Not_detect	Not_detect	Not_detect	Not_detect	Not_detect	Not_detect
NC_017022.1	terminator_00068	234521	234569	-	gene_converged;TransTermHP	transcript_00227,EFAU004_RS01160	NC_017022.1_transcript227	TRUE	diff=15,0;high=24,0;low=9,0	diff=12,0;high=23,0;low=11,0	diff=12,0;high=23,0;low=11,0	diff=7,0;high=13,0;low=6,0	diff=6,0;high=11,0;low=5,0	diff=6,0;high=11,0;low=5,0
NC_017022.1	terminator_00069	237182	237248	+	gene_converged;TransTermHP	EFAU004_RS01170	NC_017022.1_transcript228	TRUE	diff=61,0;high=120,0;low=59,0	diff=71,0;high=138,0;low=67,0	diff=87,0;high=171,0;low=84,0	diff=140,0;high=275,0;low=135,0	diff=154,0;high=290,0;low=136,0	diff=164,0;high=287,0;low=123,0
NC_017022.1	terminator_00070	256989	257016	-	gene_converged	transcript_00236	NC_017022.1_transcript236	TRUE	diff=21,0;high=41,0;low=20,0	diff=30,0;high=59,0;low=29,0	diff=33,0;high=57,0;low=24,0	diff=20,0;high=37,0;low=17,0	diff=19,8571428571;high=39,0;low=19,1428571429	diff=29,9;high=53,0;low=23,1
NC_017022.1	terminator_00071	262059	262095	+	TransTermHP	EFAU004_RS01285	NC_017022.1_transcript240	TRUE	diff=19,0;high=37,0;low=18,0	diff=18,0;high=34,0;low=16,0	diff=28,0;high=48,0;low=20,0	diff=23,0;high=40,0;low=17,0	diff=17,0;high=30,0;low=13,0	diff=15,0;high=29,0;low=14,0
NC_017022.1	terminator_00072	263064	263091	+	TransTermHP	EFAU004_RS01290	NC_017022.1_transcript243	TRUE	Not_detect	diff=6,0;high=10,0;low=4,0	Not_detect	diff=3,0;high=5,0;low=2,0	Not_detect	diff=3,0;high=4,0;low=1,0
NC_017022.1	terminator_00073	265221	265257	+	TransTermHP	EFAU004_RS01310	NC_017022.1_transcript245	TRUE	diff=9,0;high=14,0;low=5,0	diff=3,0;high=4,0;low=1,0	diff=2,0;high=3,0;low=1,0	diff=2,0;high=3,0;low=1,0	diff=2,0;high=2,0;low=0,0	diff=3,0;high=4,0;low=1,0
NC_017022.1	terminator_00074	266122	266157	-	gene_converged	transcript_00247	NC_017022.1_transcript247	TRUE	diff=2,0;high=3,0;low=1,0	diff=4,0;high=4,0;low=0,0	Not_detect	diff=20,0;high=38,0;low=18,0	diff=11,0;high=18,0;low=7,0	diff=11,0;high=21,0;low=10,0
NC_017022.1	terminator_00075	269627	269671	+	gene_converged;TransTermHP	EFAU004_RS01325	NC_017022.1_transcript249	TRUE	Not_detect	Not_detect	Not_detect	diff=11,0;high=15,0;low=4,0	diff=17,0;high=20,0;low=3,0	diff=10,0;high=12,0;low=2,0
NC_017022.1	terminator_00076	270816	270841	-	TransTermHP	EFAU004_RS01340	NC_017022.1_transcript251	TRUE	diff=15,0;high=28,0;low=13,0	diff=19,0;high=36,0;low=17,0	diff=17,0;high=33,0;low=16,0	diff=9,0;high=16,0;low=7,0	diff=12,0;high=22,0;low=10,0	diff=8,0;high=14,0;low=6,0
NC_017022.1	terminator_00077	273966	274023	-	gene_converged;TransTermHP	EFAU004_RS01355	NC_017022.1_transcript254	TRUE	diff=19,0;high=37,0;low=18,0	diff=19,0;high=35,0;low=16,0	diff=21,0;high=38,0;low=17,0	diff=15,0;high=26,0;low=11,0	diff=12,0;high=23,0;low=11,0	diff=14,0;high=21,0;low=7,0
NC_017022.1	terminator_00078	273970	274020	+	gene_converged;TransTermHP	EFAU004_RS01350	NC_017022.1_transcript253	TRUE	diff=5,0;high=9,0;low=4,0	diff=5,0;high=9,0;low=4,0	diff=6,0;high=9,0;low=3,0	diff=8,0;high=14,0;low=6,0	diff=6,0;high=10,0;low=4,0	diff=4,0;high=7,0;low=3,0
NC_017022.1	terminator_00079	275111	275161	-	TransTermHP	EFAU004_RS01360	NC_017022.1_transcript254	TRUE	diff=53,0;high=97,0;low=44,0	diff=51,0;high=98,0;low=47,0	diff=47,0;high=90,0;low=43,0	diff=22,0;high=42,0;low=20,0	diff=82,0;high=91,0;low=9,0	diff=65,0;high=71,0;low=6,0
NC_017022.1	terminator_00080	276841	276867	+	TransTermHP	EFAU004_RS01365	NC_017022.1_transcript255	FALSE	Not_detect	Not_detect	Not_detect	Not_detect	Not_detect	Not_detect
NC_017022.1	terminator_00081	277819	277849	+	TransTermHP	EFAU004_RS01375	NC_017022.1_transcript256	TRUE	diff=12,0;high=22,0;low=10,0	diff=11,0;high=18,0;low=7,0	diff=17,0;high=29,0;low=12,0	diff=3,0;high=5,0;low=2,0	diff=9,0;high=17,0;low=8,0	diff=12,0;high=23,0;low=11,0
NC_017022.1	terminator_00082	278577	278618	+	gene_converged;TransTermHP	EFAU004_RS01380	NC_017022.1_transcript258	FALSE	Not_detect	Not_detect	Not_detect	Not_detect	Not_detect	Not_detect
NC_017022.1	terminator_00083	278581	278610	-	TransTermHP	EFAU004_RS01385	NC_017022.1_transcript260	FALSE	Not_detect	Not_detect	Not_detect	Not_detect	Not_detect	Not_detect
NC_017022.1	terminator_00084	286548	286570	+	gene_converged	transcript_00266,EFAU004_RS01420	NC_017022.1_transcript266	TRUE	diff=11,0;high=19,0;low=8,0	diff=8,0;high=14,0;low=6,0	Not_detect	diff=14,0;high=24,0;low=10,0	diff=8,0;high=15,0;low=7,0	diff=12,0;high=19,0;low=7,0
NC_017022.1	terminator_00085	286548	286570	+	gene_converged	transcript_00266,EFAU004_RS01420	NC_017022.1_transcript266	TRUE	diff=11,0;high=19,0;low=8,0	diff=8,0;high=14,0;low=6,0	Not_detect	diff=14,0;high=24,0;low=10,0	diff=8,0;high=15,0;low=7,0	diff=12,0;high=19,0;low=7,0
NC_017022.1	terminator_00086	287992	288040	+	TransTermHP	EFAU004_RS01425	NC_017022.1_transcript269	TRUE	diff=2,0;high=2,0;low=0,0	diff=2,0;high=3,0;low=1,0	diff=2,0;high=3,0;low=1,0	diff=65,0;high=69,0;low=4,0	diff=75,0;high=78,0;low=3,0	diff=132,0;high=140,0;low=8,0
NC_017022.1	terminator_00087	287996	288036	-	TransTermHP	EFAU004_RS01430	NC_017022.1_transcript270	TRUE	diff=4,0;high=5,0;low=1,0	diff=3,0;high=4,0;low=1,0	diff=4,0;high=7,0;low=3,0	diff=37,0;high=61,0;low=24,0	diff=33,0;high=53,0;low=20,0	diff=38,0;high=56,0;low=18,0
NC_017022.1	terminator_00088	290811	290840	-	TransTermHP	EFAU004_RS01440	NC_017022.1_transcript284	FALSE	Not_detect	Not_detect	Not_detect	Not_detect	Not_detect	Not_detect
NC_017022.1	terminator_00089	290812	290838	+	gene_converged	transcript_00283	NC_017022.1_transcript283	TRUE	diff=13,0;high=24,0;low=11,0	diff=12,0;high=23,0;low=11,0	diff=22,0;high=38,0;low=16,0	diff=46,0;high=56,0;low=10,0	diff=34,0;high=43,0;low=9,0	diff=45,0;high=53,0;low=8,0
NC_017022.1	terminator_00090	292063	292088	+	gene_converged	transcript_00292,EFAU004_RS01445	NC_017022.1_transcript292	TRUE	diff=20,0;high=38,0;low=18,0	diff=23,0;high=33,0;low=10,0	diff=34,0;high=55,0;low=21,0	diff=3445,0;high=3462,0;low=17,0	diff=2260,0;high=2268,0;low=8,0	diff=3764,0;high=3784,0;low=20,0
NC_017022.1	terminator_00091	292063	292088	+	gene_converged	transcript_00292,EFAU004_RS01445	NC_017022.1_transcript292	TRUE	diff=20,0;high=38,0;low=18,0	diff=23,0;high=33,0;low=10,0	diff=34,0;high=55,0;low=21,0	diff=3445,0;high=3462,0;low=17,0	diff=2260,0;high=2268,0;low=8,0	diff=3764,0;high=3784,0;low=20,0
NC_017022.1	terminator_00092	294373	294400	-	TransTermHP	EFAU004_RS01460	NC_017022.1_transcript301	TRUE	diff=226,0;high=385,0;low=159,0	diff=248,0;high=477,0;low=229,0	diff=366,5;high=723,0;low=356,5	diff=5891,0;high=11582,0;low=5691,0	diff=4529,5;high=8143,5;low=3614,0	diff=5954,5;high=11747,5;low=5793,0
NC_017022.1	terminator_00093	296296	296323	+	gene_converged	transcript_00309	NC_017022.1_transcript309	TRUE	diff=3,0;high=4,0;low=1,0	Not_detect	diff=3,0;high=5,0;low=2,0	diff=40,0;high=63,0;low=23,0	diff=33,0;high=65,0;low=32,0	diff=51,0;high=82,0;low=31,0
NC_017022.1	terminator_00094	298807	298832	+	TransTermHP	EFAU004_RS01485	NC_017022.1_transcript314	FALSE	Not_detect	Not_detect	Not_detect	Not_detect	Not_detect	Not_detect
NC_017022.1	terminator_00095	303006	303061	+	gene_converged;TransTermHP	EFAU004_RS01520	NC_017022.1_transcript316	FALSE	Not_detect	Not_detect	Not_detect	Not_detect	Not_detect	Not_detect
NC_017022.1	terminator_00096	303006	303058	-	gene_converged;TransTermHP	EFAU004_RS01525	NC_017022.1_transcript317	FALSE	Not_detect	Not_detect	Not_detect	Not_detect	Not_detect	Not_detect
NC_017022.1	terminator_00097	310179	310207	+	TransTermHP	EFAU004_RS01550	NC_017022.1_transcript328	TRUE	diff=3,0;high=5,0;low=2,0	diff=4,0;high=6,0;low=2,0	diff=3,0;high=5,0;low=2,0	diff=6,0;high=10,0;low=4,0	diff=5,0;high=8,0;low=3,0	diff=4,0;high=6,0;low=2,0
NC_017022.1	terminator_00098	320733	320770	+	TransTermHP	EFAU004_RS01595	NC_017022.1_transcript343	FALSE	Not_detect	Not_detect	Not_detect	Not_detect	Not_detect	Not_detect
NC_017022.1	terminator_00099	326631	326675	-	gene_converged;TransTermHP	EFAU004_RS01630	NC_017022.1_transcript348	TRUE	diff=8,0;high=10,0;low=2,0	diff=4,0;high=7,0;low=3,0	diff=3,0;high=3,0;low=0,0	diff=3,0;high=4,0;low=1,0	diff=3,0;high=4,0;low=1,0	Not_detect
NC_017022.1	terminator_00100	2837318	2837336	+	TransTermHP	UNK	NC_017022.1_transcript2409	TRUE	Not_detect	Not_detect	Not_detect	diff=24,0;high=24,0;low=0,0	diff=16,0;high=16,0;low=0,0	diff=17,0;high=17,0;low=0,0
NC_017022.1	terminator_00101	332016	332060	+	TransTermHP	EFAU004_RS01665	NC_017022.1_transcript352	TRUE	diff=2,0;high=2,0;low=0,0	diff=4,0;high=6,0;low=2,0	diff=3,0;high=5,0;low=2,0	diff=7,0;high=13,0;low=6,0	diff=8,0;high=13,0;low=5,0	diff=10,0;high=18,0;low=8,0
NC_017022.1	terminator_00102	353162	353214	+	TransTermHP	EFAU004_RS14955	NC_017022.1_transcript368	TRUE	diff=2,0;high=2,0;low=0,0	diff=1,0;high=1,0;low=0,0	diff=2,0;high=2,0;low=0,0	diff=1,0;high=1,0;low=0,0	diff=35,0;high=37,0;low=2,0	diff=24,2;high=24,2;low=0,0
NC_017022.1	terminator_00103	376441	376455	+	TransTermHP	EFAU004_RS01855	NC_017022.1_transcript384	TRUE	Not_detect	diff=29,0;high=55,0;low=26,0	diff=15,0;high=29,0;low=14,0	diff=2076,0;high=2152,0;low=76,0	diff=1356,0;high=1407,0;low=51,0	diff=1397,0;high=1484,0;low=87,0
NC_017022.1	terminator_00104	383641	383676	+	TransTermHP	EFAU004_RS01880	NC_017022.1_transcript386	TRUE	diff=15,0;high=28,0;low=13,0	diff=23,0;high=44,0;low=21,0	diff=27,0;high=47,0;low=20,0	diff=22,0;high=41,0;low=19,0	diff=16,0;high=31,0;low=15,0	diff=19,0;high=35,0;low=16,0
NC_017022.1	terminator_00105	386348	386388	+	gene_converged;TransTermHP	EFAU004_RS01890	NC_017022.1_transcript387	FALSE	Not_detect	Not_detect	Not_detect	Not_detect	Not_detect	Not_detect
NC_017022.1	terminator_00106	386915	386954	-	gene_converged	transcript_00388,EFAU004_RS01895	NC_017022.1_transcript388	TRUE	Not_detect	diff=7,0;high=13,0;low=6,0	diff=9,5;high=18,0;low=8,5	diff=3,0;high=4,02702702703;low=1,02702702703	diff=4,04347826087;high=8,04347826087;low=4,0	Not_detect
NC_017022.1	terminator_00107	398416	398449	+	TransTermHP	EFAU004_RS01955	NC_017022.1_transcript398	FALSE	Not_detect	Not_detect	Not_detect	Not_detect	Not_detect	Not_detect
NC_017022.1	terminator_00108	402764	402816	+	gene_converged;TransTermHP	EFAU004_RS01975	NC_017022.1_transcript401	FALSE	Not_detect	Not_detect	Not_detect	Not_detect	Not_detect	Not_detect
NC_017022.1	terminator_00109	406075	406104	+	TransTermHP	EFAU004_RS01985	NC_017022.1_transcript404	TRUE	diff=51,0;high=91,0;low=40,0	diff=98,0;high=149,0;low=51,0	diff=95,0;high=180,0;low=85,0	diff=67,0;high=131,0;low=64,0	diff=76,0;high=145,0;low=69,0	diff=67,0;high=133,0;low=66,0
NC_017022.1	terminator_00110	419020	419059	+	gene_converged	EFAU004_RS02025	NC_017022.1_transcript414	TRUE	diff=2,0;high=3,0;low=1,0	diff=1,5;high=2,5;low=1,0	Not_detect	diff=27,5;high=32,5;low=5,0	diff=20,0;high=22,0;low=2,0	diff=22,5;high=25,5;low=3,0
NC_017022.1	terminator_00111	420147	420189	-	gene_converged;TransTermHP	EFAU004_RS02035	NC_017022.1_transcript416	TRUE	diff=3,0;high=5,0;low=2,0	diff=4,0;high=6,0;low=2,0	diff=3,0;high=4,0;low=1,0	diff=25,0;high=30,0;low=5,0	diff=7,0;high=13,0;low=6,0	diff=19,0;high=22,0;low=3,0
NC_017022.1	terminator_00112	424434	424474	-	gene_converged	EFAU004_RS02050	NC_017022.1_transcript418	TRUE	diff=5,0;high=6,23611111111;low=1,23611111111	diff=3,92857142857;high=6,0;low=2,07142857143	diff=7,0;high=9,0;low=2,0	diff=99,8888888889;high=113,0;low=13,1111111111	diff=65,0;high=78,0;low=13,0	diff=104,0;high=120,0;low=16,0
NC_017022.1	terminator_00113	429173	429203	+	TransTermHP	EFAU004_RS02075	NC_017022.1_transcript424	TRUE	Not_detect	diff=5,0;high=8,0;low=3,0	diff=7,0;high=12,0;low=5,0	diff=15,0;high=15,0;low=0,0	diff=13,0;high=14,0;low=1,0	diff=13,0;high=13,0;low=0,0
NC_017022.1	terminator_00114	432476	432539	-	gene_converged;TransTermHP	EFAU004_RS02100	NA	TRUE	diff=4,0;high=6,0;low=2,0	diff=4,0;high=7,0;low=3,0	diff=5,0;high=8,0;low=3,0	diff=12,0;high=17,0;low=5,0	diff=7,0;high=12,0;low=5,0	diff=5,0;high=7,0;low=2,0
NC_017022.1	terminator_00115	432483	432535	+	gene_converged;TransTermHP	EFAU004_RS02095	NC_017022.1_transcript428	FALSE	Not_detect	Not_detect	Not_detect	Not_detect	Not_detect	Not_detect
NC_017022.1	terminator_00116	438810	438840	+	TransTermHP	EFAU004_RS02120	NC_017022.1_transcript437	FALSE	Not_detect	Not_detect	Not_detect	Not_detect	Not_detect	Not_detect
NC_017022.1	terminator_00117	442278	442307	+	TransTermHP	EFAU004_RS02145	NC_017022.1_transcript441	TRUE	diff=4,0;high=6,0;low=2,0	diff=1,0;high=1,0;low=0,0	diff=2,0;high=3,0;low=1,0	diff=7,0;high=12,0;low=5,0	diff=2,0;high=2,0;low=0,0	diff=6,0;high=8,0;low=2,0
NC_017022.1	terminator_00118	445396	445435	+	gene_converged	transcript_00442,EFAU004_RS02160	NC_017022.1_transcript442	TRUE	diff=37,0;high=60,0;low=23,0	diff=42,25;high=71,5;low=29,25	diff=46,875;high=93,0;low=46,125	diff=127,8333333333;high=149,0;low=21,1666666667	diff=73,5769230769;high=91,0769230769;low=17,5	diff=123,0625;high=137,5625;low=14,5
NC_017022.1	terminator_00119	449190	449225	-	TransTermHP	EFAU004_RS02175	NC_017022.1_transcript444	TRUE	diff=5,0;high=5,0;low=0,0	diff=4,0;high=4,0;low=0,0	diff=7,0;high=9,0;low=2,0	diff=148,0;high=149,0;low=1,0	diff=128,0;high=129,0;low=1,0	diff=110,0;high=110,0;low=0,0
NC_017022.1	terminator_00120	452035	452073	-	gene_converged;TransTermHP	EFAU004_RS02190	NC_017022.1_transcript446	TRUE	diff=16,0;high=26,0;low=10,0	diff=20,0;high=37,0;low=17,0	diff=22,0;high=35,0;low=13,0	diff=10,0;high=12,0;low=2,0	diff=8,0;high=10,0;low=2,0	diff=12,0;high=16,0;low=4,0
NC_017022.1	terminator_00121	459442	459500	+	gene_converged;TransTermHP	EFAU004_RS02210	NC_017022.1_transcript449	FALSE	Not_detect	Not_detect	Not_detect	Not_detect	Not_detect	Not_detect
NC_017022.1	terminator_00122	462460	462525	-	gene_converged;TransTermHP	EFAU004_RS02225	NC_017022.1_transcript453	TRUE	diff=8,0;high=14,0;low=6,0	diff=7,0;high=13,0;low=6,0	diff=15,0;high=22,0;low=7,0	diff=15,0;high=16,0;low=1,0	diff=1,0;high=1,0;low=0,0	diff=5,0;high=9,0;low=4,0
NC_017022.1	terminator_00123	465892	465918	+	TransTermHP	EFAU004_RS02240	NC_017022.1_transcript455	TRUE	diff=9,0;high=16,0;low=7,0	diff=10,0;high=18,0;low=8,0	diff=17,0;high=32,0;low=15,0	diff=21,0;high=39,0;low=18,0	diff=25,0;high=45,0;low=20,0	diff=21,0;high=41,0;low=20,0
NC_017022.1	terminator_00124	473341	473366	+	TransTermHP	EFAU004_RS02270	NC_017022.1_transcript464	TRUE	diff=30,909090909099998;high=59,6818181818;low=28,7727272727	diff=41,787878787900006;high=80,1515151515;low=38,3636363636	diff=31,9656862745;high=61,6515151515;low=29,685828877	diff=80,15240641710001;high=153,803030303;low=73,6506238859	diff=68,594474153;high=128,03030303;low=59,435828877	diff=50,7629233512;high=101,196969697;low=50,4340463458
NC_017022.1	terminator_00125	476773	476812	+	gene_converged;TransTermHP	rrf	NC_017022.1_transcript465	TRUE	diff=18620,7333334;high=35414,3833334;low=16793,65	diff=28817,183333099998;high=53992,7499998;low=25175,5666667	diff=25058,9999998;high=46530,2333332;low=21471,2333334	diff=6577,899999969999;high=12264,3333333;low=5686,43333333	diff=6452,93333336;high=12806,4666667;low=6353,53333334	diff=7655,01666663;high=15309,5333333;low=7654,51666667
NC_017022.1	terminator_00126	476778	476799	-	TransTermHP	EFAU004_RS02285	NC_017022.1_transcript466	TRUE	diff=67,0;high=72,0;low=5,0	diff=62,0;high=72,0;low=10,0	diff=62,0;high=68,0;low=6,0	diff=11,0;high=12,0;low=1,0	diff=22,0;high=25,0;low=3,0	diff=24,0;high=24,0;low=0,0
NC_017022.1	terminator_00127	477324	477369	-	TransTermHP	EFAU004_RS02290	NC_017022.1_transcript466	TRUE	diff=75,0;high=126,0;low=51,0	diff=54,0;high=104,0;low=50,0	diff=91,0;high=164,0;low=73,0	diff=55,0;high=95,0;low=40,0	diff=41,0;high=81,0;low=40,0	diff=54,0;high=100,0;low=46,0
NC_017022.1	terminator_00128	482863	482873	+	TransTermHP	EFAU004_RS02310	NC_017022.1_transcript471	TRUE	Not_detect	Not_detect	Not_detect	diff=11,0;high=21,0;low=10,0	diff=4,0;high=7,0;low=3,0	diff=8,0;high=12,0;low=4,0
NC_017022.1	terminator_00129	490682	490704	+	TransTermHP	EFAU004_RS02350	NA	FALSE	Not_detect	Not_detect	Not_detect	Not_detect	Not_detect	Not_detect
NC_017022.1	terminator_00130	492329	492378	+	TransTermHP	EFAU004_RS02355	NC_017022.1_transcript476	TRUE	diff=9,0;high=16,0;low=7,0	diff=11,0;high=21,0;low=10,0	diff=9,0;high=17,0;low=8,0	diff=11,0;high=20,0;low=9,0	diff=11,0;high=19,0;low=8,0	diff=14,0;high=22,0;low=8,0
NC_017022.1	terminator_00131	494219	494244	-	gene_converged	transcript_00479,EFAU004_RS02370	NC_017022.1_transcript479	TRUE	Not_detect	diff=3,0;high=5,0;low=2,0	Not_detect	diff=13,0;high=13,0;low=0,0	diff=16,0;high=20,0;low=4,0	diff=14,0;high=15,0;low=1,0
NC_017022.1	terminator_00132	502918	502963	+	gene_converged;TransTermHP	EFAU004_RS02410	NC_017022.1_transcript484	FALSE	Not_detect	Not_detect	Not_detect	Not_detect	Not_detect	Not_detect
NC_017022.1	terminator_00133	507109	507140	+	TransTermHP	EFAU004_RS02430	NC_017022.1_transcript488	TRUE	diff=6,0;high=11,0;low=5,0	diff=5,0;high=8,0;low=3,0	diff=5,0;high=7,0;low=2,0	diff=5,0;high=7,0;low=2,0	diff=3,0;high=4,0;low=1,0	diff=4,0;high=7,0;low=3,0
NC_017022.1	terminator_00134	510183	510211	+	TransTermHP	EFAU004_RS02445	NC_017022.1_transcript491	TRUE	diff=3,0;high=3,0;low=0,0	diff=3,0;high=4,0;low=1,0	diff=5,0;high=6,0;low=1,0	diff=4,0;high=6,0;low=2,0	diff=4,0;high=5,0;low=1,0	diff=6,0;high=10,0;low=4,0
NC_017022.1	terminator_00135	511971	512027	+	TransTermHP	EFAU004_RS02450	NC_017022.1_transcript492	FALSE	Not_detect	Not_detect	Not_detect	Not_detect	Not_detect	Not_detect
NC_017022.1	terminator_00136	518314	518350	+	TransTermHP	EFAU004_RS02485	NC_017022.1_transcript499	TRUE	diff=21,0;high=38,0;low=17,0	diff=26,0;high=46,0;low=20,0	diff=19,0;high=37,0;low=18,0	diff=27,0;high=52,0;low=25,0	diff=24,0;high=47,0;low=23,0	diff=17,0;high=31,0;low=14,0
NC_017022.1	terminator_00137	521483	521522	+	gene_converged	EFAU004_RS02500	NC_017022.1_transcript501	TRUE	diff=11,5;high=21,0;low=9,5	diff=6,904761904800001;high=13,1547619048;low=6,25	diff=8,5;high=15,0;low=6,5	diff=16,07297297297;high=25,1;low=9,02702702703	diff=12,0;high=21,0;low=9,0	diff=13,0;high=24,0;low=11,0
NC_017022.1	terminator_00138	524975	524986	+	TransTermHP	EFAU004_RS02530	NC_017022.1_transcript511	TRUE	Not_detect	diff=11,0;high=21,0;low=10,0	diff=10,0;high=15,0;low=5,0	diff=293,0;high=301,0;low=8,0	diff=301,0;high=308,0;low=7,0	diff=277,0;high=288,0;low=11,0
NC_017022.1	terminator_00139	544447	544496	-	gene_converged;TransTermHP	transcript_00520,EFAU004_RS02620	NC_017022.1_transcript520	TRUE	diff=6,0;high=10,0;low=4,0	diff=7,0;high=13,0;low=6,0	diff=14,0;high=27,0;low=13,0	diff=10,0;high=19,0;low=9,0	diff=15,0;high=28,0;low=13,0	diff=7,0;high=13,0;low=6,0
NC_017022.1	terminator_00140	545781	545820	-	TransTermHP	EFAU004_RS02625	NC_017022.1_transcript520	TRUE	diff=71,0;high=99,0;low=28,0	diff=60,0;high=115,0;low=55,0	diff=112,0;high=158,0;low=46,0	diff=245,0;high=449,0;low=204,0	diff=232,0;high=458,0;low=226,0	diff=185,0;high=354,0;low=169,0
NC_017022.1	terminator_00141	552450	552505	-	gene_converged;TransTermHP	transcript_00523	NC_017022.1_transcript523	TRUE	diff=8,0;high=15,0;low=7,0	diff=10,0;high=18,0;low=8,0	diff=7,333333333300001;high=13,3333333333;low=6,0	diff=8,0;high=13,0;low=5,0	diff=5,0;high=8,0;low=3,0	diff=3,0;high=5,0;low=2,0
NC_017022.1	terminator_00142	552877	552911	-	gene_converged	EFAU004_RS02655	NC_017022.1_transcript523	TRUE	Not_detect	diff=32,0;high=62,0;low=30,0	diff=48,0;high=94,0;low=46,0	diff=21,0666666667;high=41,0666666667;low=20,0	diff=19,0;high=32,0;low=13,0	diff=16,0;high=30,0;low=14,0
NC_017022.1	terminator_00143	556963	556993	+	TransTermHP	EFAU004_RS02665	NC_017022.1_transcript525	TRUE	diff=44,0;high=87,0;low=43,0	diff=44,0;high=77,0;low=33,0	diff=27,0;high=48,0;low=21,0	diff=43,0;high=77,0;low=34,0	diff=30,0;high=53,0;low=23,0	diff=24,0;high=41,0;low=17,0
NC_017022.1	terminator_00144	560286	560318	+	TransTermHP	EFAU004_RS02680	NC_017022.1_transcript527	FALSE	Not_detect	Not_detect	Not_detect	Not_detect	Not_detect	Not_detect
NC_017022.1	terminator_00145	560357	560388	-	gene_converged	EFAU004_RS02685	NC_017022.1_transcript528	TRUE	diff=15,0;high=26,0;low=11,0	Not_detect	diff=9,0;high=16,0;low=7,0	diff=6,0;high=11,0;low=5,0	diff=5,0;high=9,0;low=4,0	diff=4,0;high=6,0;low=2,0
NC_017022.1	terminator_00146	562562	562610	+	TransTermHP	EFAU004_RS02690	NC_017022.1_transcript529	TRUE	diff=7,0;high=8,0;low=1,0	diff=4,0;high=6,0;low=2,0	diff=4,0;high=6,0;low=2,0	diff=6,0;high=10,0;low=4,0	diff=8,0;high=15,0;low=7,0	diff=12,0;high=20,0;low=8,0
NC_017022.1	terminator_00147	564213	564244	-	gene_converged	transcript_00530	NC_017022.1_transcript530	TRUE	Not_detect	Not_detect	Not_detect	diff=11,0;high=12,0;low=1,0	diff=12,0;high=12,0;low=0,0	diff=15,0;high=16,0;low=1,0
NC_017022.1	terminator_00148	565339	565389	-	gene_converged;TransTermHP	EFAU004_RS02705	NC_017022.1_transcript533	FALSE	Not_detect	Not_detect	Not_detect	Not_detect	Not_detect	Not_detect
NC_017022.1	terminator_00149	567434	567448	+	TransTermHP	EFAU004_RS02710	NC_017022.1_transcript534	TRUE	Not_detect	diff=9,0;high=17,0;low=8,0	Not_detect	diff=6,0;high=10,0;low=4,0	Not_detect	diff=4,0;high=6,0;low=2,0
NC_017022.1	terminator_00150	569970	569996	+	gene_converged	transcript_00535,EFAU004_RS02720	NC_017022.1_transcript535	TRUE	diff=13,33333333333;high=22,25;low=8,91666666667	diff=6,0;high=10,0;low=4,0	diff=11,071428571430001;high=20,9880952381;low=9,91666666667	diff=28,0;high=31,0;low=3,0	diff=35,0;high=40,0;low=5,0	diff=34,75;high=37,0;low=2,25
NC_017022.1	terminator_00151	571784	571825	+	TransTermHP	EFAU004_RS02730	NC_017022.1_transcript538	TRUE	diff=11,0;high=20,0;low=9,0	diff=18,0;high=35,0;low=17,0	diff=18,0;high=33,0;low=15,0	diff=8,0;high=14,0;low=6,0	diff=16,0;high=28,0;low=12,0	diff=8,0;high=14,0;low=6,0
NC_017022.1	terminator_00152	577704	577740	+	TransTermHP	EFAU004_RS02760	NC_017022.1_transcript543	TRUE	diff=44,0;high=81,0;low=37,0	diff=84,0;high=165,0;low=81,0	diff=71,0;high=141,0;low=70,0	diff=86,0;high=153,0;low=67,0	diff=82,0;high=155,0;low=73,0	diff=86,0;high=170,0;low=84,0
NC_017022.1	terminator_00153	580383	580418	+	TransTermHP	EFAU004_RS02775	NC_017022.1_transcript545	FALSE	Not_detect	Not_detect	Not_detect	Not_detect	Not_detect	Not_detect
NC_017022.1	terminator_00154	585734	585764	+	TransTermHP	EFAU004_RS02800	NC_017022.1_transcript546	TRUE	diff=1,0;high=1,0;low=0,0	diff=4,0;high=6,0;low=2,0	diff=6,0;high=11,0;low=5,0	diff=4,0;high=6,0;low=2,0	diff=7,0;high=12,0;low=5,0	diff=13,0;high=23,0;low=10,0
NC_017022.1	terminator_00155	591885	591938	+	gene_converged;TransTermHP	EFAU004_RS02840	NC_017022.1_transcript551	TRUE	diff=1,0;high=1,0;low=0,0	Not_detect	diff=1,0;high=1,0;low=0,0	diff=16,0;high=29,0;low=13,0	diff=18,0;high=21,0;low=3,0	diff=15,0;high=20,0;low=5,0
NC_017022.1	terminator_00156	592618	592670	+	TransTermHP	EFAU004_RS15075	NC_017022.1_transcript555	TRUE	diff=21,0;high=25,0;low=4,0	diff=19,0;high=26,0;low=7,0	diff=36,0;high=42,0;low=6,0	diff=6214,0;high=6233,0;low=19,0	diff=4910,0;high=4928,0;low=18,0	diff=8490,0;high=8523,0;low=33,0
NC_017022.1	terminator_00157	604157	604196	+	gene_converged	transcript_00564,EFAU004_RS02875	NC_017022.1_transcript564	TRUE	Not_detect	diff=9,0;high=17,0;low=8,0	diff=11,0;high=21,0;low=10,0	diff=3,0;high=5,0;low=2,0	Not_detect	diff=8,0;high=14,0;low=6,0
NC_017022.1	terminator_00158	607360	607370	-	TransTermHP	EFAU004_RS02885	NC_017022.1_transcript572	TRUE	diff=1,0;high=1,0;low=0,0	Not_detect	diff=3,0;high=5,0;low=2,0	diff=31,0;high=32,0;low=1,0	diff=24,0;high=25,0;low=1,0	diff=31,0;high=32,0;low=1,0
NC_017022.1	terminator_00159	611894	611932	+	TransTermHP	EFAU004_RS02900	NC_017022.1_transcript576	TRUE	diff=108,0;high=144,0;low=36,0	diff=158,0;high=198,0;low=40,0	diff=156,0;high=199,0;low=43,0	diff=9495,0;high=9583,0;low=88,0	diff=9010,0;high=9106,0;low=96,0	diff=7082,0;high=13687,0;low=6605,0
NC_017022.1	terminator_00160	625244	625255	+	TransTermHP	EFAU004_RS02965	NC_017022.1_transcript590	TRUE	diff=10,0;high=17,0;low=7,0	Not_detect	diff=12,0;high=22,0;low=10,0	diff=5,0;high=9,0;low=4,0	diff=6,0;high=8,0;low=2,0	diff=6,0;high=11,0;low=5,0
NC_017022.1	terminator_00161	631372	631395	+	TransTermHP	EFAU004_RS02990	NC_017022.1_transcript595	TRUE	diff=5,0;high=9,0;low=4,0	diff=8,0;high=15,0;low=7,0	Not_detect	diff=7,0;high=13,0;low=6,0	diff=5,0;high=8,0;low=3,0	diff=3,0;high=5,0;low=2,0
NC_017022.1	terminator_00162	631364	631397	-	gene_converged	EFAU004_RS15110	NC_017022.1_transcript596	TRUE	Not_detect	Not_detect	Not_detect	diff=22,0;high=22,0;low=0,0	diff=14,0;high=14,0;low=0,0	diff=13,0;high=13,0;low=0,0
NC_017022.1	terminator_00163	641099	641146	+	TransTermHP	EFAU004_RS03040	NC_017022.1_transcript609	TRUE	diff=5,0;high=6,0;low=1,0	diff=12,0;high=23,0;low=11,0	diff=23,0;high=45,0;low=22,0	diff=6,0;high=10,0;low=4,0	diff=6,0;high=11,0;low=5,0	diff=14,0;high=25,0;low=11,0
NC_017022.1	terminator_00164	642082	642125	-	gene_converged;TransTermHP	transcript_00610,EFAU004_RS03050	NC_017022.1_transcript610	TRUE	diff=9,0;high=17,0;low=8,0	diff=18,0;high=30,0;low=12,0	diff=14,0;high=27,0;low=13,0	diff=35,0;high=48,0;low=13,0	diff=48,0;high=69,0;low=21,0	diff=26,0;high=35,0;low=9,0
NC_017022.1	terminator_00165	646973	647009	+	TransTermHP	EFAU004_RS03060	NC_017022.1_transcript612	TRUE	diff=30,0;high=48,0;low=18,0	diff=21,0;high=41,0;low=20,0	diff=46,0;high=74,0;low=28,0	diff=42,0;high=81,0;low=39,0	diff=43,0;high=80,0;low=37,0	diff=52,0;high=103,0;low=51,0
NC_017022.1	terminator_00166	654083	654113	-	TransTermHP	EFAU004_RS03095	NC_017022.1_transcript617	TRUE	diff=2,0;high=2,0;low=0,0	Not_detect	diff=3,0;high=3,0;low=0,0	diff=58,0;high=98,0;low=40,0	diff=41,0;high=74,0;low=33,0	diff=61,0;high=110,0;low=49,0
NC_017022.1	terminator_00167	656774	656814	-	gene_converged;TransTermHP	transcript_00620,EFAU004_RS03105	NC_017022.1_transcript620	TRUE	diff=9,0;high=15,0;low=6,0	diff=17,0;high=29,0;low=12,0	diff=24,0;high=34,0;low=10,0	diff=11,0;high=20,0;low=9,0	diff=11,0;high=20,0;low=9,0	diff=5,0;high=9,0;low=4,0
NC_017022.1	terminator_00168	659222	659254	+	gene_converged;TransTermHP	transcript_00622,EFAU004_RS03110	NC_017022.1_transcript622	TRUE	diff=32,0;high=50,0;low=18,0	diff=70,0;high=95,0;low=25,0	diff=66,0;high=88,0;low=22,0	diff=23,0;high=43,0;low=20,0	diff=38,0;high=49,0;low=11,0	diff=39,0;high=61,0;low=22,0
NC_017022.1	terminator_00169	667694	667725	+	gene_converged	EFAU004_RS03145	NC_017022.1_transcript631	TRUE	diff=9,0;high=16,0;low=7,0	diff=10,0;high=19,0;low=9,0	diff=7,0;high=12,0;low=5,0	diff=14,0;high=25,0;low=11,0	diff=11,0;high=20,0;low=9,0	diff=6,0;high=11,0;low=5,0
NC_017022.1	terminator_00170	672976	673006	+	TransTermHP	EFAU004_RS03175	NC_017022.1_transcript639	TRUE	diff=7,0;high=12,0;low=5,0	diff=6,0;high=10,0;low=4,0	diff=12,0;high=22,0;low=10,0	diff=15,0;high=27,0;low=12,0	diff=9,0;high=17,0;low=8,0	diff=13,0;high=25,0;low=12,0
NC_017022.1	terminator_00171	674457	674484	-	gene_converged	EFAU004_RS03185	NC_017022.1_transcript640	TRUE	diff=5,7;high=11,0;low=5,3	diff=9,3;high=16,0;low=6,7	diff=7,0;high=13,0;low=6,0	diff=18,0;high=20,0;low=2,0	diff=16,0;high=17,0;low=1,0	diff=21,0;high=22,0;low=1,0
NC_017022.1	terminator_00172	677435	677483	+	gene_converged;TransTermHP	EFAU004_RS03205	NC_017022.1_transcript645	TRUE	diff=5,0;high=8,0;low=3,0	diff=7,0;high=10,0;low=3,0	diff=4,0;high=6,0;low=2,0	diff=5,0;high=8,0;low=3,0	diff=4,0;high=5,0;low=1,0	diff=3,0;high=5,0;low=2,0
NC_017022.1	terminator_00173	680843	680884	+	TransTermHP	EFAU004_RS03225	NC_017022.1_transcript649	TRUE	diff=11,0;high=18,0;low=7,0	diff=6,0;high=11,0;low=5,0	diff=13,0;high=23,0;low=10,0	diff=13,0;high=24,0;low=11,0	diff=8,0;high=14,0;low=6,0	diff=9,0;high=16,0;low=7,0
NC_017022.1	terminator_00174	683157	683184	+	gene_converged	transcript_00652	NC_017022.1_transcript652	TRUE	Not_detect	Not_detect	diff=5,0;high=5,0;low=0,0	diff=11,0;high=12,0;low=1,0	diff=34,0;high=34,0;low=0,0	diff=11,0;high=11,0;low=0,0
NC_017022.1	terminator_00175	683262	683302	-	gene_converged	transcript_00653	NC_017022.1_transcript653	TRUE	diff=27,0;high=51,0;low=24,0	diff=27,0;high=50,0;low=23,0	diff=23,0;high=45,0;low=22,0	diff=6,67572339941;high=12,0;low=5,32427660059	diff=9,0;high=14,0;low=5,0	diff=8,0;high=15,0;low=7,0
NC_017022.1	terminator_00176	683766	683785	-	TransTermHP	EFAU004_RS03245	NC_017022.1_transcript656	TRUE	diff=14,0;high=26,0;low=12,0	diff=15,0;high=29,0;low=14,0	diff=26,0;high=51,0;low=25,0	Not_detect	diff=8,0;high=14,0;low=6,0	diff=4,0;high=7,0;low=3,0
NC_017022.1	terminator_00177	686654	686678	+	TransTermHP	EFAU004_RS03255	NC_017022.1_transcript657	FALSE	Not_detect	Not_detect	Not_detect	Not_detect	Not_detect	Not_detect
NC_017022.1	terminator_00178	686718	686766	-	gene_converged;TransTermHP	transcript_00658	NC_017022.1_transcript658	FALSE	Not_detect	Not_detect	Not_detect	Not_detect	Not_detect	Not_detect
NC_017022.1	terminator_00179	693022	693069	-	gene_converged;TransTermHP	EFAU004_RS03280	NC_017022.1_transcript664	FALSE	Not_detect	Not_detect	Not_detect	Not_detect	Not_detect	Not_detect
NC_017022.1	terminator_00180	695751	695798	-	gene_converged;TransTermHP	transcript_00666,EFAU004_RS03290	NC_017022.1_transcript666	TRUE	diff=6,0;high=11,0;low=5,0	diff=7,0;high=13,0;low=6,0	diff=12,875;high=20,0;low=7,125	diff=7,0;high=8,5;low=1,5	diff=9,0;high=16,0;low=7,0	diff=4,125;high=7,125;low=3,0
NC_017022.1	terminator_00181	701362	701372	+	TransTermHP	EFAU004_RS03320	NC_017022.1_transcript670	TRUE	Not_detect	Not_detect	diff=5,0;high=8,0;low=3,0	diff=445,0;high=456,0;low=11,0	diff=321,0;high=336,0;low=15,0	diff=284,0;high=304,0;low=20,0
NC_017022.1	terminator_00182	725371	725416	+	gene_converged;TransTermHP	EFAU004_RS03425	NC_017022.1_transcript684	TRUE	diff=87,3353174603;high=172,0;low=84,6646825397	diff=52,7904761905;high=87,0;low=34,2095238095	diff=164,916666667;high=320,0;low=155,083333333	diff=28,3015873016;high=47,0;low=18,6984126984	diff=14,471428571500002;high=28,0666666667;low=13,5952380952	diff=36,7802197802;high=73,0;low=36,2197802198
NC_017022.1	terminator_00183	725378	725419	-	gene_converged	EFAU004_RS15170	NC_017022.1_transcript685	FALSE	Not_detect	Not_detect	Not_detect	Not_detect	Not_detect	Not_detect
NC_017022.1	terminator_00184	728146	728195	+	TransTermHP	EFAU004_RS03435	NA	FALSE	Not_detect	Not_detect	Not_detect	Not_detect	Not_detect	Not_detect
NC_017022.1	terminator_00185	729316	729350	+	TransTermHP	EFAU004_RS03440	NC_017022.1_transcript694	TRUE	diff=19,0;high=37,0;low=18,0	diff=32,0;high=63,0;low=31,0	diff=32,0;high=63,0;low=31,0	diff=36,0;high=69,0;low=33,0	diff=37,0;high=70,0;low=33,0	diff=42,0;high=71,0;low=29,0
NC_017022.1	terminator_00186	732405	732429	+	TransTermHP	EFAU004_RS03455	NC_017022.1_transcript697	TRUE	diff=78,0;high=137,0;low=59,0	diff=94,0;high=166,0;low=72,0	diff=101,0;high=193,0;low=92,0	diff=100,0;high=199,0;low=99,0	diff=117,0;high=218,0;low=101,0	diff=126,0;high=230,0;low=104,0
NC_017022.1	terminator_00187	737155	737196	-	gene_converged;TransTermHP	EFAU004_RS03485	NA	FALSE	Not_detect	Not_detect	Not_detect	Not_detect	Not_detect	Not_detect
NC_017022.1	terminator_00188	739942	739986	-	gene_converged	EFAU004_RS03500	NC_017022.1_transcript708	TRUE	diff=8,0;high=12,0;low=4,0	diff=9,0;high=17,0;low=8,0	diff=9,0;high=17,0;low=8,0	diff=11,0;high=21,0;low=10,0	diff=12,0;high=23,0;low=11,0	diff=9,0;high=15,0;low=6,0
NC_017022.1	terminator_00189	747203	747219	+	TransTermHP	EFAU004_RS03535	NC_017022.1_transcript710	TRUE	Not_detect	diff=60,0;high=117,0;low=57,0	diff=70,0;high=134,0;low=64,0	diff=87,0;high=128,0;low=41,0	diff=77,0;high=133,0;low=56,0	diff=88,0;high=137,0;low=49,0
NC_017022.1	terminator_00190	749387	749429	+	gene_converged;TransTermHP	transcript_00710,EFAU004_RS03550	NC_017022.1_transcript710	TRUE	diff=6,0;high=10,0;low=4,0	diff=6,0;high=10,0;low=4,0	diff=10,0;high=18,0;low=8,0	diff=9,0;high=16,0;low=7,0	diff=5,0;high=9,0;low=4,0	diff=11,0;high=21,0;low=10,0
NC_017022.1	terminator_00191	751547	751602	+	gene_converged;TransTermHP	EFAU004_RS03560	NC_017022.1_transcript715	FALSE	Not_detect	Not_detect	Not_detect	Not_detect	Not_detect	Not_detect
NC_017022.1	terminator_00192	751548	751603	-	gene_converged;TransTermHP	EFAU004_RS03565	NC_017022.1_transcript716	FALSE	Not_detect	Not_detect	Not_detect	Not_detect	Not_detect	Not_detect
NC_017022.1	terminator_00193	752274	752320	-	TransTermHP	EFAU004_RS03570	NC_017022.1_transcript717	TRUE	diff=13,0;high=24,0;low=11,0	diff=15,0;high=29,0;low=14,0	Not_detect	diff=14,0;high=27,0;low=13,0	diff=15,0;high=26,0;low=11,0	Not_detect
NC_017022.1	terminator_00194	758062	758072	+	TransTermHP	EFAU004_RS15190	NA	TRUE	diff=1,0;high=1,0;low=0,0	Not_detect	Not_detect	diff=15,0;high=15,0;low=0,0	diff=8,0;high=8,0;low=0,0	diff=9,0;high=9,0;low=0,0
NC_017022.1	terminator_00195	762537	762575	+	TransTermHP	EFAU004_RS03605	NC_017022.1_transcript721	FALSE	Not_detect	Not_detect	Not_detect	Not_detect	Not_detect	Not_detect
NC_017022.1	terminator_00196	766390	766439	-	gene_converged;TransTermHP	EFAU004_RS03630	NC_017022.1_transcript724	FALSE	Not_detect	Not_detect	Not_detect	Not_detect	Not_detect	Not_detect
NC_017022.1	terminator_00197	766395	766435	+	gene_converged;TransTermHP	EFAU004_RS03625	NC_017022.1_transcript723	FALSE	Not_detect	Not_detect	Not_detect	Not_detect	Not_detect	Not_detect
NC_017022.1	terminator_00198	769935	769965	+	TransTermHP	EFAU004_RS03640	NC_017022.1_transcript725	TRUE	diff=7,0;high=13,0;low=6,0	diff=8,0;high=15,0;low=7,0	diff=6,0;high=11,0;low=5,0	diff=9,0;high=15,0;low=6,0	diff=6,0;high=9,0;low=3,0	diff=5,0;high=9,0;low=4,0
NC_017022.1	terminator_00199	770211	770236	+	TransTermHP	EFAU004_RS03645	NC_017022.1_transcript726	TRUE	diff=4903,0;high=5805,0;low=902,0	diff=6751,0;high=7996,0;low=1245,0	diff=6860,0;high=8102,0;low=1242,0	diff=55134,0;high=56490,0;low=1356,0	diff=35175,0;high=37174,0;low=1999,0	diff=61013,0;high=62486,0;low=1473,0
NC_017022.1	terminator_00200	772482	772536	+	gene_converged;TransTermHP	EFAU004_RS03655	NC_017022.1_transcript728	FALSE	Not_detect	Not_detect	Not_detect	Not_detect	Not_detect	Not_detect
NC_017022.1	terminator_00201	772482	772538	-	gene_converged;TransTermHP	EFAU004_RS03660	NC_017022.1_transcript729	FALSE	Not_detect	Not_detect	Not_detect	Not_detect	Not_detect	Not_detect
NC_017022.1	terminator_00202	774465	774491	+	TransTermHP	EFAU004_RS03675	NC_017022.1_transcript730	TRUE	diff=79,0;high=126,0;low=47,0	diff=63,0;high=104,0;low=41,0	diff=79,0;high=131,0;low=52,0	diff=55,0;high=91,0;low=36,0	diff=60,0;high=98,0;low=38,0	diff=57,0;high=80,0;low=23,0
NC_017022.1	terminator_00203	777687	777729	+	TransTermHP	EFAU004_RS03680	NC_017022.1_transcript732	FALSE	Not_detect	Not_detect	Not_detect	Not_detect	Not_detect	Not_detect
NC_017022.1	terminator_00204	780275	780289	+	TransTermHP	EFAU004_RS03695	NC_017022.1_transcript733	TRUE	Not_detect	Not_detect	Not_detect	diff=61,0;high=115,0;low=54,0	diff=45,0;high=87,0;low=42,0	diff=48,0;high=94,0;low=46,0
NC_017022.1	terminator_00205	781245	781264	+	TransTermHP	EFAU004_RS03700	NC_017022.1_transcript733	TRUE	Not_detect	diff=7,0;high=13,0;low=6,0	diff=8,0;high=15,0;low=7,0	diff=19,0;high=30,0;low=11,0	diff=8,0;high=14,0;low=6,0	diff=8,0;high=15,0;low=7,0
NC_017022.1	terminator_00206	781692	781723	+	TransTermHP	EFAU004_RS03705	NC_017022.1_transcript734	TRUE	diff=4,0;high=7,0;low=3,0	diff=3,0;high=5,0;low=2,0	diff=6,0;high=10,0;low=4,0	diff=3,0;high=5,0;low=2,0	diff=9,0;high=16,0;low=7,0	diff=13,0;high=25,0;low=12,0
NC_017022.1	terminator_00207	782097	782121	+	TransTermHP	EFAU004_RS03710	NC_017022.1_transcript735	TRUE	diff=82,0;high=153,0;low=71,0	diff=101,0;high=198,0;low=97,0	diff=70,0;high=138,0;low=68,0	diff=117,0;high=198,0;low=81,0	diff=111,0;high=177,0;low=66,0	diff=82,0;high=118,0;low=36,0
NC_017022.1	terminator_00208	783452	783471	+	TransTermHP	EFAU004_RS03715	NC_017022.1_transcript736	TRUE	diff=341,0;high=528,0;low=187,0	diff=351,0;high=532,0;low=181,0	diff=357,0;high=586,0;low=229,0	diff=9572,0;high=9726,0;low=154,0	diff=8912,0;high=9060,0;low=148,0	diff=8248,0;high=8389,0;low=141,0
NC_017022.1	terminator_00209	784409	784428	+	TransTermHP	EFAU004_RS03725	NC_017022.1_transcript736	TRUE	diff=6,0;high=10,0;low=4,0	diff=6,0;high=11,0;low=5,0	Not_detect	diff=20,0;high=36,0;low=16,0	diff=17,0;high=32,0;low=15,0	diff=18,0;high=34,0;low=16,0
NC_017022.1	terminator_00210	790901	790941	+	gene_converged;TransTermHP	EFAU004_RS03760	NC_017022.1_transcript738	TRUE	diff=5,0;high=8,0;low=3,0	diff=8,0;high=15,0;low=7,0	diff=5,0;high=9,0;low=4,0	Not_detect	diff=2,0;high=2,0;low=0,0	diff=3,0;high=3,0;low=0,0
NC_017022.1	terminator_00211	790906	790937	-	TransTermHP	EFAU004_RS03765	NC_017022.1_transcript739	TRUE	diff=8,0;high=11,0;low=3,0	diff=12,0;high=20,0;low=8,0	diff=19,0;high=34,0;low=15,0	diff=9,25;high=16,25;low=7,0	diff=11,0;high=18,0;low=7,0	diff=14,0;high=27,0;low=13,0
NC_017022.1	terminator_00212	791843	791867	+	gene_converged	transcript_00741	NC_017022.1_transcript741	TRUE	diff=3,0;high=4,0;low=1,0	Not_detect	Not_detect	diff=27,0;high=30,0;low=3,0	diff=24,0;high=28,0;low=4,0	diff=40,0;high=41,0;low=1,0
NC_017022.1	terminator_00213	792666	792699	+	TransTermHP	EFAU004_RS03775	NC_017022.1_transcript743	FALSE	Not_detect	Not_detect	Not_detect	Not_detect	Not_detect	Not_detect
NC_017022.1	terminator_00214	801686	801696	+	TransTermHP	EFAU004_RS03815	NC_017022.1_transcript744	TRUE	diff=432,0;high=621,0;low=189,0	diff=464,0;high=689,0;low=225,0	diff=773,0;high=1056,0;low=283,0	diff=9124,0;high=9264,0;low=140,0	diff=9200,0;high=9338,0;low=138,0	diff=10134,0;high=10283,0;low=149,0
NC_017022.1	terminator_00215	803009	803020	+	TransTermHP	EFAU004_RS03820	NC_017022.1_transcript744	TRUE	diff=147,0;high=152,0;low=5,0	diff=105,0;high=113,0;low=8,0	diff=221,0;high=227,0;low=6,0	diff=69,0;high=71,0;low=2,0	diff=88,0;high=94,0;low=6,0	diff=62,0;high=66,0;low=4,0
NC_017022.1	terminator_00216	807649	807677	+	TransTermHP	EFAU004_RS03845	NC_017022.1_transcript744	TRUE	diff=69,0;high=134,0;low=65,0	diff=105,0;high=200,0;low=95,0	diff=92,0;high=174,0;low=82,0	diff=117,0;high=233,0;low=116,0	diff=108,0;high=215,0;low=107,0	diff=111,0;high=220,0;low=109,0
NC_017022.1	terminator_00217	810520	810564	-	TransTermHP	EFAU004_RS03855	NC_017022.1_transcript746	FALSE	Not_detect	Not_detect	Not_detect	Not_detect	Not_detect	Not_detect
NC_017022.1	terminator_00218	810520	810566	+	gene_converged;TransTermHP	EFAU004_RS03850	NC_017022.1_transcript744	TRUE	diff=3,0;high=4,0;low=1,0	diff=7,0;high=10,0;low=3,0	diff=10,0;high=13,0;low=3,0	diff=9,0;high=17,0;low=8,0	diff=5,0;high=9,0;low=4,0	diff=12,0;high=22,0;low=10,0
NC_017022.1	terminator_00219	816468	816483	+	TransTermHP	EFAU004_RS03880	NC_017022.1_transcript749	TRUE	Not_detect	diff=10,625;high=20,625;low=10,0	Not_detect	diff=6,0;high=10,0;low=4,0	diff=2,0;high=3,0;low=1,0	diff=4,0;high=6,0;low=2,0
NC_017022.1	terminator_00220	824312	824356	+	gene_converged;TransTermHP	EFAU004_RS03930	NC_017022.1_transcript757	TRUE	diff=1206,0;high=1563,0;low=357,0	diff=1533,0;high=1975,0;low=442,0	diff=1629,0;high=2142,0;low=513,0	diff=295,0;high=549,0;low=254,0	diff=421,5;high=520,0;low=98,5	diff=338,5;high=562,0;low=223,5
NC_017022.1	terminator_00221	837950	837974	+	TransTermHP	EFAU004_RS04060	NC_017022.1_transcript776	TRUE	diff=7,5;high=12,0;low=4,5	diff=4,0;high=7,5;low=3,5	diff=6,5;high=12,5;low=6,0	diff=1211,0;high=1219,0;low=8,0	diff=882,833333333;high=889,333333333;low=6,5	diff=1501,83333333;high=1510,83333333;low=9,0
NC_017022.1	terminator_00222	860181	860209	+	gene_converged;TransTermHP	EFAU004_RS04190	NC_017022.1_transcript791	TRUE	diff=6,999999999970001;high=13,3333333333;low=6,33333333333	diff=5,0;high=9,66666666667;low=4,66666666667	diff=10,5;high=20,5;low=10,0	diff=148,166666666;high=291,833333333;low=143,666666667	diff=144,4999999997;high=234,833333333;low=90,3333333333	diff=141,66666666700002;high=275,666666667;low=134,0
NC_017022.1	terminator_00223	860326	860385	-	gene_converged	transcript_00792	NC_017022.1_transcript792	TRUE	diff=65,83333333336999;high=68,1666666667;low=2,33333333333	diff=77,08333333333;high=86,0;low=8,91666666667	diff=111,416666667;high=124,916666667;low=13,5	diff=17678,0833333333;high=17754,25;low=76,1666666667	diff=14,0;high=24,5;low=10,5	diff=22,5;high=32,5;low=10,0
NC_017022.1	terminator_00224	861640	861661	-	TransTermHP	EFAU004_RS04205	NC_017022.1_transcript794	TRUE	diff=6,0;high=11,0;low=5,0	diff=7,0;high=13,0;low=6,0	diff=9,5;high=16,0;low=6,5	diff=2,0;high=3,0;low=1,0	diff=2,5;high=3,0;low=0,5	diff=3,0;high=5,5;low=2,5
NC_017022.1	terminator_00225	862121	862145	+	gene_converged	transcript_00793	NC_017022.1_transcript793	TRUE	diff=8,41666666667;high=16,5;low=8,08333333333	diff=6,500000000029999;high=11,6666666667;low=5,16666666667	diff=6,08333333337;high=11,6666666667;low=5,58333333333	diff=5,5;high=10,5;low=5,0	Not_detect	diff=2,1666666666600003;high=3,83333333333;low=1,66666666667
NC_017022.1	terminator_00226	864043	864088	+	TransTermHP	EFAU004_RS04220	NC_017022.1_transcript797	TRUE	diff=23,0;high=41,5;low=18,5	diff=17,0;high=31,0;low=14,0	diff=19,0;high=34,5;low=15,5	diff=17,5;high=29,0;low=11,5	diff=17,0;high=33,0;low=16,0	diff=16,5;high=29,0;low=12,5
NC_017022.1	terminator_00227	872490	872525	+	TransTermHP	EFAU004_RS04255	NC_017022.1_transcript803	FALSE	Not_detect	Not_detect	Not_detect	Not_detect	Not_detect	Not_detect
NC_017022.1	terminator_00228	874837	874904	-	gene_converged	transcript_00807	NC_017022.1_transcript807	TRUE	Not_detect	diff=1,8;high=2,0;low=0,2	diff=2,0;high=3,0;low=1,0	diff=30,0;high=30,0;low=0,0	diff=26,0;high=27,0;low=1,0	diff=22,0;high=25,0;low=3,0
NC_017022.1	terminator_00229	875188	875220	+	TransTermHP	EFAU004_RS04275	NC_017022.1_transcript808	TRUE	diff=196,0;high=376,0;low=180,0	diff=373,0;high=740,0;low=367,0	diff=442,0;high=873,0;low=431,0	diff=116,0;high=230,0;low=114,0	diff=184,0;high=363,0;low=179,0	diff=217,0;high=417,0;low=200,0
NC_017022.1	terminator_00230	876481	876495	+	TransTermHP	EFAU004_RS04280	NC_017022.1_transcript808	FALSE	Not_detect	Not_detect	Not_detect	Not_detect	Not_detect	Not_detect
NC_017022.1	terminator_00231	879000	879025	+	TransTermHP	EFAU004_RS04295	NC_017022.1_transcript822	FALSE	Not_detect	Not_detect	Not_detect	Not_detect	Not_detect	Not_detect
NC_017022.1	terminator_00232	881975	882011	+	gene_converged;TransTermHP	transcript_00823,EFAU004_RS04305	NC_017022.1_transcript823	TRUE	diff=13,0;high=23,0;low=10,0	diff=23,0;high=43,0;low=20,0	diff=19,0;high=36,0;low=17,0	diff=17,0;high=30,0;low=13,0	diff=15,0;high=24,0;low=9,0	diff=10,0;high=18,0;low=8,0
NC_017022.1	terminator_00233	881976	882010	-	gene_converged;TransTermHP	transcript_00824,EFAU004_RS04310	NC_017022.1_transcript824	TRUE	diff=8,0;high=14,0;low=6,0	diff=12,0;high=20,0;low=8,0	diff=7,0;high=11,0;low=4,0	diff=10,0;high=19,0;low=9,0	diff=7,0;high=11,0;low=4,0	diff=4,0;high=6,0;low=2,0
NC_017022.1	terminator_00234	883291	883342	-	gene_converged;TransTermHP	transcript_00826,EFAU004_RS04315	NC_017022.1_transcript826	FALSE	Not_detect	Not_detect	Not_detect	Not_detect	Not_detect	Not_detect
NC_017022.1	terminator_00235	884437	884465	-	TransTermHP	EFAU004_RS04325	NC_017022.1_transcript828	TRUE	diff=32,0;high=52,0;low=20,0	diff=37,0;high=66,0;low=29,0	diff=82,0;high=140,0;low=58,0	diff=78,0;high=151,0;low=73,0	diff=75,0;high=149,0;low=74,0	diff=194,0;high=386,0;low=192,0
NC_017022.1	terminator_00236	894526	894551	-	gene_converged	transcript_00840,EFAU004_RS04365	NC_017022.1_transcript840	TRUE	diff=6,0;high=9,0;low=3,0	diff=9,0;high=14,0;low=5,0	diff=7,0;high=12,0;low=5,0	diff=7,0;high=13,0;low=6,0	diff=6,0;high=10,0;low=4,0	diff=7,0;high=13,0;low=6,0
NC_017022.1	terminator_00237	894526	894551	-	gene_converged	transcript_00840,EFAU004_RS04365	NC_017022.1_transcript840	TRUE	diff=6,0;high=9,0;low=3,0	diff=9,0;high=14,0;low=5,0	diff=7,0;high=12,0;low=5,0	diff=7,0;high=13,0;low=6,0	diff=6,0;high=10,0;low=4,0	diff=7,0;high=13,0;low=6,0
NC_017022.1	terminator_00238	895606	895636	-	TransTermHP	EFAU004_RS04375	NC_017022.1_transcript842	TRUE	Not_detect	Not_detect	diff=1,0;high=1,0;low=0,0	diff=6,0;high=11,0;low=5,0	diff=11,0;high=12,0;low=1,0	diff=9,0;high=16,0;low=7,0
NC_017022.1	terminator_00239	899673	899700	-	gene_converged	transcript_00846	NC_017022.1_transcript846	TRUE	diff=1,0;high=1,0;low=0,0	diff=2,0;high=2,0;low=0,0	diff=1,0;high=1,0;low=0,0	diff=59,0;high=59,0;low=0,0	diff=70,0;high=71,0;low=1,0	diff=47,0;high=47,0;low=0,0
NC_017022.1	terminator_00240	906951	906976	+	TransTermHP	EFAU004_RS04420	NC_017022.1_transcript851	TRUE	diff=9,0;high=14,0;low=5,0	diff=18,0;high=30,0;low=12,0	diff=5,0;high=9,0;low=4,0	diff=3,0;high=5,0;low=2,0	diff=7,0;high=13,0;low=6,0	diff=5,0;high=7,0;low=2,0
NC_017022.1	terminator_00241	910051	910085	+	TransTermHP	EFAU004_RS04435	NC_017022.1_transcript852	FALSE	Not_detect	Not_detect	Not_detect	Not_detect	Not_detect	Not_detect
NC_017022.1	terminator_00242	912494	912518	+	gene_converged	EFAU004_RS04450	NC_017022.1_transcript855	TRUE	diff=10,0;high=18,0;low=8,0	Not_detect	Not_detect	diff=9,0;high=12,0;low=3,0	Not_detect	diff=8,0;high=13,0;low=5,0
NC_017022.1	terminator_00243	916615	916643	+	TransTermHP	EFAU004_RS04470	NC_017022.1_transcript859	TRUE	diff=16,0;high=23,0;low=7,0	diff=14,0;high=26,0;low=12,0	diff=23,0;high=38,0;low=15,0	diff=29,0;high=39,0;low=10,0	diff=20,0;high=35,0;low=15,0	diff=27,0;high=46,0;low=19,0
NC_017022.1	terminator_00244	918783	918819	+	TransTermHP	EFAU004_RS04480	NC_017022.1_transcript861	TRUE	diff=9,0;high=16,0;low=7,0	diff=11,0;high=21,0;low=10,0	diff=10,0;high=17,0;low=7,0	diff=13,0;high=22,0;low=9,0	diff=13,0;high=22,0;low=9,0	diff=10,0;high=15,0;low=5,0
NC_017022.1	terminator_00245	920781	920791	+	TransTermHP	EFAU004_RS04495	NC_017022.1_transcript865	TRUE	diff=8,0;high=14,0;low=6,0	diff=6,0;high=11,0;low=5,0	diff=6,0;high=10,0;low=4,0	Not_detect	diff=3,0;high=4,0;low=1,0	diff=2,0;high=3,0;low=1,0
NC_017022.1	terminator_00246	922165	922190	+	TransTermHP	EFAU004_RS04505	NA	TRUE	diff=3,0;high=4,0;low=1,0	diff=4,0;high=5,0;low=1,0	diff=6,0;high=11,0;low=5,0	diff=7,0;high=11,0;low=4,0	diff=3,0;high=4,0;low=1,0	diff=4,0;high=7,0;low=3,0
NC_017022.1	terminator_00247	929356	929388	+	TransTermHP	EFAU004_RS04530	NC_017022.1_transcript873	TRUE	Not_detect	diff=7,0;high=13,0;low=6,0	diff=7,0;high=13,0;low=6,0	diff=9,0;high=17,0;low=8,0	diff=4,0;high=7,0;low=3,0	Not_detect
NC_017022.1	terminator_00248	931115	931166	-	TransTermHP	EFAU004_RS04540	NC_017022.1_transcript875	TRUE	diff=9,0;high=17,0;low=8,0	diff=8,0;high=14,0;low=6,0	diff=9,0;high=17,0;low=8,0	diff=11,0;high=20,0;low=9,0	diff=13,0;high=25,0;low=12,0	diff=15,0;high=29,0;low=14,0
NC_017022.1	terminator_00249	931121	931160	+	TransTermHP	EFAU004_RS04535	NC_017022.1_transcript874	TRUE	diff=2,0;high=3,0;low=1,0	diff=5,0;high=8,0;low=3,0	diff=3,0;high=5,0;low=2,0	diff=8,0;high=15,0;low=7,0	diff=5,0;high=8,0;low=3,0	diff=3,0;high=4,0;low=1,0
NC_017022.1	terminator_00250	954401	954423	+	TransTermHP	EFAU004_RS04630	NC_017022.1_transcript896	TRUE	diff=16,0;high=29,0;low=13,0	diff=13,0;high=23,0;low=10,0	diff=20,0;high=34,0;low=14,0	diff=28,0;high=50,0;low=22,0	diff=28,0;high=53,0;low=25,0	diff=24,0;high=35,0;low=11,0
NC_017022.1	terminator_00251	964023	964064	+	gene_converged;TransTermHP	EFAU004_RS04665	NC_017022.1_transcript898	FALSE	Not_detect	Not_detect	Not_detect	Not_detect	Not_detect	Not_detect
NC_017022.1	terminator_00252	968244	968282	-	TransTermHP	EFAU004_RS04690	NC_017022.1_transcript902	TRUE	diff=5,0;high=9,0;low=4,0	diff=12,0;high=20,0;low=8,0	diff=11,0;high=20,0;low=9,0	diff=15,0;high=28,0;low=13,0	diff=13,0;high=24,0;low=11,0	diff=17,0;high=32,0;low=15,0
NC_017022.1	terminator_00253	974191	974238	-	gene_converged	transcript_00909,EFAU004_RS04720	NC_017022.1_transcript909	TRUE	diff=185,0;high=198,0;low=13,0	diff=175,0;high=180,0;low=5,0	diff=521,0;high=534,0;low=13,0	diff=14176,0;high=14674,0;low=498,0	diff=10272,0;high=10643,0;low=371,0	diff=17236,0;high=17880,0;low=644,0
NC_017022.1	terminator_00254	978105	978153	+	gene_converged;TransTermHP	transcript_00914,EFAU004_RS04730	NC_017022.1_transcript914	TRUE	diff=5,0;high=9,0;low=4,0	diff=8,0;high=15,0;low=7,0	diff=7,0;high=13,0;low=6,0	diff=8,0;high=13,0;low=5,0	diff=7,0;high=12,0;low=5,0	diff=7,0;high=12,0;low=5,0
NC_017022.1	terminator_00255	978104	978150	-	gene_converged;TransTermHP	transcript_00915,EFAU004_RS04735	NC_017022.1_transcript915	TRUE	diff=8,0;high=12,0;low=4,0	diff=7,0;high=12,0;low=5,0	diff=6,0;high=10,0;low=4,0	diff=12,0;high=22,0;low=10,0	diff=12,0;high=20,0;low=8,0	diff=7,0;high=13,0;low=6,0
NC_017022.1	terminator_00256	997188	997226	+	TransTermHP	EFAU004_RS04830	NC_017022.1_transcript923	TRUE	diff=21,0;high=39,0;low=18,0	diff=23,0;high=44,0;low=21,0	diff=22,0;high=41,0;low=19,0	diff=14,75;high=28,0;low=13,25	diff=16,0;high=31,0;low=15,0	diff=18,0;high=33,0;low=15,0
NC_017022.1	terminator_00257	998184	998225	+	gene_converged;TransTermHP	EFAU004_RS04840	NC_017022.1_transcript925	FALSE	Not_detect	Not_detect	Not_detect	Not_detect	Not_detect	Not_detect
NC_017022.1	terminator_00258	999426	999455	-	TransTermHP	EFAU004_RS04850	NC_017022.1_transcript926	TRUE	diff=28,0;high=54,0;low=26,0	diff=24,0;high=47,0;low=23,0	Not_detect	diff=13,0;high=24,0;low=11,0	diff=13,0;high=22,0;low=9,0	diff=12,0;high=23,0;low=11,0
NC_017022.1	terminator_00259	1000213	1000249	-	TransTermHP	EFAU004_RS04855	NC_017022.1_transcript927	TRUE	diff=11,0;high=21,0;low=10,0	diff=10,0;high=19,0;low=9,0	diff=14,0;high=26,0;low=12,0	diff=9,0;high=12,0;low=3,0	diff=11,0;high=20,0;low=9,0	diff=21,0;high=30,0;low=9,0
NC_017022.1	terminator_00260	1003767	1003803	+	TransTermHP	EFAU004_RS04865	NC_017022.1_transcript929	TRUE	diff=9,0;high=11,0;low=2,0	diff=5,0;high=7,0;low=2,0	diff=21,0;high=21,0;low=0,0	diff=863,0;high=865,0;low=2,0	diff=617,0;high=622,0;low=5,0	diff=990,0;high=995,0;low=5,0
NC_017022.1	terminator_00261	1003767	1003803	-	TransTermHP	EFAU004_RS04870	NC_017022.1_transcript931	TRUE	diff=5,0;high=8,0;low=3,0	diff=6,0;high=11,0;low=5,0	diff=4,0;high=6,0;low=2,0	Not_detect	diff=3,0;high=3,0;low=0,0	diff=2,0;high=2,0;low=0,0
NC_017022.1	terminator_00262	1006834	1006885	+	gene_converged;TransTermHP	EFAU004_RS04880	NC_017022.1_transcript932	FALSE	Not_detect	Not_detect	Not_detect	Not_detect	Not_detect	Not_detect
NC_017022.1	terminator_00263	1012042	1012079	-	TransTermHP	EFAU004_RS04905	NC_017022.1_transcript935	TRUE	diff=18,0;high=30,0;low=12,0	diff=13,0;high=25,0;low=12,0	Not_detect	Not_detect	diff=13,0;high=17,0;low=4,0	diff=11,0;high=20,0;low=9,0
NC_017022.1	terminator_00264	1015311	1015326	-	TransTermHP	EFAU004_RS04915	NC_017022.1_transcript935	TRUE	diff=15396,0;high=20628,0;low=5232,0	diff=19435,0;high=25874,0;low=6439,0	diff=16267,0;high=21841,0;low=5574,0	Not_detect	diff=3733,0;high=6995,0;low=3262,0	Not_detect
NC_017022.1	terminator_00265	1019541	1019566	+	TransTermHP	EFAU004_RS04930	NC_017022.1_transcript936	FALSE	Not_detect	Not_detect	Not_detect	Not_detect	Not_detect	Not_detect
NC_017022.1	terminator_00266	1024415	1024454	-	TransTermHP	EFAU004_RS04960	NC_017022.1_transcript942	TRUE	diff=29,0;high=56,0;low=27,0	diff=31,0;high=61,0;low=30,0	diff=27,0;high=52,0;low=25,0	diff=24,0;high=47,0;low=23,0	diff=20,0;high=33,0;low=13,0	diff=16,0;high=27,0;low=11,0
NC_017022.1	terminator_00267	1026634	1026666	-	TransTermHP	EFAU004_RS04970	NC_017022.1_transcript944	TRUE	Not_detect	Not_detect	Not_detect	diff=9,0;high=14,0;low=5,0	diff=7,0;high=11,0;low=4,0	diff=5,0;high=9,0;low=4,0
NC_017022.1	terminator_00268	1034550	1034567	+	gene_converged	transcript_00953	NC_017022.1_transcript953	TRUE	Not_detect	Not_detect	Not_detect	diff=20,0;high=20,0;low=0,0	diff=14,0;high=14,0;low=0,0	diff=16,0;high=17,0;low=1,0
NC_017022.1	terminator_00269	1036722	1036772	-	gene_converged;TransTermHP	transcript_00954,EFAU004_RS05015	NC_017022.1_transcript954	TRUE	diff=13,0;high=22,0;low=9,0	diff=10,0;high=14,0;low=4,0	diff=14,0;high=23,0;low=9,0	diff=7,0;high=13,0;low=6,0	diff=8,0;high=15,0;low=7,0	diff=7,0;high=12,0;low=5,0
NC_017022.1	terminator_00270	1036722	1036772	-	gene_converged;TransTermHP	transcript_00954,EFAU004_RS05015	NC_017022.1_transcript954	TRUE	diff=13,0;high=22,0;low=9,0	diff=10,0;high=14,0;low=4,0	diff=14,0;high=23,0;low=9,0	diff=7,0;high=13,0;low=6,0	diff=8,0;high=15,0;low=7,0	diff=7,0;high=12,0;low=5,0
NC_017022.1	terminator_00271	1039103	1039146	-	gene_converged;TransTermHP	transcript_00956,EFAU004_RS05030	NC_017022.1_transcript956	TRUE	diff=20,0;high=30,0;low=10,0	diff=20,0;high=33,0;low=13,0	diff=12,0;high=23,0;low=11,0	diff=16,0;high=26,0;low=10,0	diff=15,0;high=26,0;low=11,0	diff=11,0;high=21,0;low=10,0
NC_017022.1	terminator_00272	1039827	1039855	-	TransTermHP	obgE	NC_017022.1_transcript957	TRUE	diff=26,0;high=46,0;low=20,0	diff=30,0;high=59,0;low=29,0	diff=27,0;high=51,0;low=24,0	diff=12,0;high=22,0;low=10,0	diff=16,0;high=30,0;low=14,0	diff=10,0;high=16,0;low=6,0
NC_017022.1	terminator_00273	1042586	1042629	+	gene_converged;TransTermHP	EFAU004_RS05040	NC_017022.1_transcript958	FALSE	Not_detect	Not_detect	Not_detect	Not_detect	Not_detect	Not_detect
NC_017022.1	terminator_00274	1044699	1044738	+	gene_converged	transcript_00963	NC_017022.1_transcript963	FALSE	Not_detect	Not_detect	Not_detect	Not_detect	Not_detect	Not_detect
NC_017022.1	terminator_00275	1046934	1046963	-	gene_converged	transcript_00967,EFAU004_RS05065	NC_017022.1_transcript967	TRUE	diff=39,0;high=77,0;low=38,0	diff=32,0;high=62,0;low=30,0	diff=41,0;high=80,0;low=39,0	diff=15,0;high=28,0;low=13,0	diff=27,0;high=46,0;low=19,0	diff=26,0;high=42,0;low=16,0
NC_017022.1	terminator_00276	1046879	1046923	+	TransTermHP	EFAU004_RS05060	NC_017022.1_transcript966	TRUE	diff=26,0;high=30,0;low=4,0	diff=26,0;high=28,0;low=2,0	diff=16,0;high=22,0;low=6,0	diff=7,0;high=7,0;low=0,0	diff=10,0;high=10,0;low=0,0	diff=13,0;high=15,0;low=2,0
NC_017022.1	terminator_00277	1048432	1048481	+	gene_converged;TransTermHP	EFAU004_RS05070	NC_017022.1_transcript968	TRUE	diff=30,0;high=58,0;low=28,0	diff=25,0;high=41,0;low=16,0	diff=30,0;high=53,0;low=23,0	diff=37,0;high=73,0;low=36,0	diff=31,0;high=60,0;low=29,0	diff=38,0;high=75,0;low=37,0
NC_017022.1	terminator_00278	1050741	1050767	-	gene_converged	transcript_00972,EFAU004_RS05085	NC_017022.1_transcript972	TRUE	diff=24,5;high=45,0;low=20,5	diff=29,0;high=52,0;low=23,0	diff=27,0;high=53,0;low=26,0	diff=5,10714285714;high=10,0;low=4,89285714286	diff=9,0;high=16,5;low=7,5	diff=6,66666666667;high=11,0;low=4,33333333333
NC_017022.1	terminator_00279	1054310	1054339	-	TransTermHP	EFAU004_RS05105	NC_017022.1_transcript973	TRUE	diff=9,0;high=17,0;low=8,0	diff=7,0;high=12,0;low=5,0	diff=9,0;high=16,0;low=7,0	Not_detect	diff=8,0;high=14,0;low=6,0	diff=13,0;high=24,0;low=11,0
NC_017022.1	terminator_00280	1058528	1058564	+	gene_converged	EFAU004_RS05125	NC_017022.1_transcript975	FALSE	Not_detect	Not_detect	Not_detect	Not_detect	Not_detect	Not_detect
NC_017022.1	terminator_00281	1058597	1058633	-	gene_converged;TransTermHP	transcript_00976,EFAU004_RS05130	NC_017022.1_transcript976	TRUE	diff=19,0;high=30,0;low=11,0	diff=19,0;high=25,0;low=6,0	diff=15,0;high=27,0;low=12,0	diff=9,0;high=13,0;low=4,0	diff=10,0;high=19,0;low=9,0	diff=7,0;high=13,0;low=6,0
NC_017022.1	terminator_00282	1062196	1062223	-	TransTermHP	EFAU004_RS05140	NC_017022.1_transcript976	TRUE	Not_detect	diff=22,0;high=43,0;low=21,0	Not_detect	diff=25,0;high=49,0;low=24,0	diff=26,0;high=49,0;low=23,0	diff=29,0;high=56,0;low=27,0
NC_017022.1	terminator_00283	1070319	1070342	-	gene_converged	transcript_00978	NC_017022.1_transcript978	TRUE	diff=115,514285714;high=223,705952381;low=108,191666667	diff=146,27976190500002;high=279,613095238;low=133,333333333	diff=261,57142857200006;high=468,054761905;low=206,483333333	diff=12079,412301600001;high=22232,8777778;low=10153,4654762	diff=9379,184920610001;high=17461,2722222;low=8082,08730159	diff=12759,9019842;high=24885,5293651;low=12125,6273809
NC_017022.1	terminator_00284	1071686	1071734	+	gene_converged;TransTermHP	transcript_00979	NC_017022.1_transcript979	FALSE	Not_detect	Not_detect	Not_detect	Not_detect	Not_detect	Not_detect
NC_017022.1	terminator_00285	1071769	1071809	-	gene_converged;TransTermHP	transcript_00980,EFAU004_RS05165	NC_017022.1_transcript980	TRUE	diff=17,0;high=27,0;low=10,0	diff=11,0;high=21,0;low=10,0	diff=19,0;high=34,0;low=15,0	diff=16,0;high=28,0;low=12,0	diff=10,0;high=16,0;low=6,0	diff=22,0;high=34,0;low=12,0
NC_017022.1	terminator_00286	1074279	1074333	-	gene_converged;TransTermHP	EFAU004_RS05175	NC_017022.1_transcript982	FALSE	Not_detect	Not_detect	Not_detect	Not_detect	Not_detect	Not_detect
NC_017022.1	terminator_00287	1074284	1074327	+	gene_converged;TransTermHP	EFAU004_RS05170	NC_017022.1_transcript981	FALSE	Not_detect	Not_detect	Not_detect	Not_detect	Not_detect	Not_detect
NC_017022.1	terminator_00288	1076798	1076830	+	gene_converged;TransTermHP	transcript_00986,EFAU004_RS05195	NC_017022.1_transcript986	TRUE	diff=57,0;high=99,0;low=42,0	diff=82,0;high=122,0;low=40,0	diff=101,0;high=145,0;low=44,0	diff=68,0;high=83,0;low=15,0	diff=61,0;high=83,0;low=22,0	diff=53,0;high=75,0;low=22,0
NC_017022.1	terminator_00289	1077713	1077756	+	gene_converged;TransTermHP	transcript_00989,EFAU004_RS05205	NC_017022.1_transcript989	TRUE	diff=9,0;high=16,0;low=7,0	diff=10,0;high=18,0;low=8,0	diff=14,0;high=23,0;low=9,0	diff=1,0;high=1,0;low=0,0	diff=1,0;high=1,0;low=0,0	diff=3,0;high=4,0;low=1,0
NC_017022.1	terminator_00290	1078684	1078735	+	gene_converged;TransTermHP	EFAU004_RS05220	NC_017022.1_transcript991	TRUE	diff=1,0;high=1,0;low=0,0	diff=1,0;high=1,0;low=0,0	Not_detect	diff=9,0;high=10,0;low=1,0	diff=10,0;high=10,0;low=0,0	diff=6,0;high=7,0;low=1,0
NC_017022.1	terminator_00291	1080848	1080898	+	gene_converged;TransTermHP	EFAU004_RS05240	NC_017022.1_transcript995	FALSE	Not_detect	Not_detect	Not_detect	Not_detect	Not_detect	Not_detect
NC_017022.1	terminator_00292	1082282	1082319	+	gene_converged	EFAU004_RS05250	NC_017022.1_transcript999	FALSE	Not_detect	Not_detect	Not_detect	Not_detect	Not_detect	Not_detect
NC_017022.1	terminator_00293	1082349	1082406	-	gene_converged;TransTermHP	transcript_01001,EFAU004_RS05255	NC_017022.1_transcript1001	TRUE	diff=38,0;high=75,0;low=37,0	diff=45,0;high=86,0;low=41,0	diff=75,0;high=142,0;low=67,0	diff=60,0;high=64,0;low=4,0	diff=63,0;high=76,0;low=13,0	diff=88,0;high=95,0;low=7,0
NC_017022.1	terminator_00294	1082592	1082632	+	gene_converged	transcript_01002	NC_017022.1_transcript1002	TRUE	Not_detect	Not_detect	Not_detect	diff=21,0;high=21,0;low=0,0	diff=18,0;high=18,0;low=0,0	diff=20,0;high=20,0;low=0,0
NC_017022.1	terminator_00295	1084539	1084583	-	gene_converged;TransTermHP	EFAU004_RS05270	NC_017022.1_transcript1005	FALSE	Not_detect	Not_detect	Not_detect	Not_detect	Not_detect	Not_detect
NC_017022.1	terminator_00296	1084548	1084572	+	TransTermHP	EFAU004_RS05265	NC_017022.1_transcript1004	TRUE	diff=2,0;high=3,0;low=1,0	diff=5,0;high=8,0;low=3,0	diff=6,0;high=10,0;low=4,0	diff=2,0;high=2,0;low=0,0	diff=6,0;high=6,0;low=0,0	diff=5,0;high=9,0;low=4,0
NC_017022.1	terminator_00297	1089649	1089682	+	TransTermHP	EFAU004_RS05285	NC_017022.1_transcript1009	TRUE	diff=5,0;high=9,0;low=4,0	diff=13,0;high=22,0;low=9,0	diff=16,0;high=29,0;low=13,0	diff=11,0;high=21,0;low=10,0	diff=12,0;high=22,0;low=10,0	diff=15,0;high=29,0;low=14,0
NC_017022.1	terminator_00298	1092596	1092614	+	TransTermHP	EFAU004_RS05295	NC_017022.1_transcript1010	TRUE	diff=19,0;high=35,0;low=16,0	diff=26,0;high=50,0;low=24,0	diff=28,0;high=51,0;low=23,0	diff=30,0;high=58,0;low=28,0	diff=34,0;high=67,0;low=33,0	diff=40,0;high=75,0;low=35,0
NC_017022.1	terminator_00299	1093292	1093318	+	TransTermHP	EFAU004_RS05300	NC_017022.1_transcript1013	TRUE	diff=8,0;high=11,0;low=3,0	diff=14,0;high=21,0;low=7,0	diff=15,0;high=21,0;low=6,0	diff=1312,0;high=1412,0;low=100,0	diff=948,0;high=1019,0;low=71,0	diff=1543,0;high=1637,0;low=94,0
NC_017022.1	terminator_00300	1093751	1093780	+	gene_converged;TransTermHP	EFAU004_RS05305	NC_017022.1_transcript1014	TRUE	diff=5,0;high=8,0;low=3,0	diff=7,0;high=12,0;low=5,0	diff=10,0;high=17,0;low=7,0	diff=7,0;high=8,0;low=1,0	diff=11,0;high=20,0;low=9,0	diff=5,0;high=9,0;low=4,0
NC_017022.1	terminator_00301	1099280	1099314	-	TransTermHP	EFAU004_RS05340	NC_017022.1_transcript1017	FALSE	Not_detect	Not_detect	Not_detect	Not_detect	Not_detect	Not_detect
NC_017022.1	terminator_00302	1101458	1101496	-	TransTermHP	EFAU004_RS05355	NC_017022.1_transcript1019	TRUE	diff=8,0;high=15,0;low=7,0	diff=5,0;high=8,0;low=3,0	diff=16,0;high=28,0;low=12,0	diff=12,0;high=22,0;low=10,0	diff=7,0;high=12,0;low=5,0	diff=9,0;high=17,0;low=8,0
NC_017022.1	terminator_00303	1110440	1110472	-	TransTermHP	EFAU004_RS05390	NC_017022.1_transcript1021	FALSE	Not_detect	Not_detect	Not_detect	Not_detect	Not_detect	Not_detect
NC_017022.1	terminator_00304	1113653	1113684	-	TransTermHP	EFAU004_RS05405	NC_017022.1_transcript1023	TRUE	diff=5,0;high=8,0;low=3,0	diff=8,0;high=8,0;low=0,0	diff=10,0;high=17,0;low=7,0	diff=11,0;high=18,0;low=7,0	diff=9,0;high=15,0;low=6,0	diff=10,0;high=15,0;low=5,0
NC_017022.1	terminator_00305	1129563	1129597	-	gene_converged	transcript_01028	NC_017022.1_transcript1028	TRUE	diff=1,0;high=1,0;low=0,0	diff=1,0;high=1,0;low=0,0	Not_detect	diff=64,0;high=64,0;low=0,0	diff=36,7142857143;high=36,7142857143;low=0,0	diff=42,4285714286;high=42,4285714286;low=0,0
NC_017022.1	terminator_00306	1143523	1143543	+	gene_converged	transcript_01033	NC_017022.1_transcript1033	TRUE	diff=107,964285715;high=213,422619048;low=105,458333333	diff=136,86309523800003;high=265,363095238;low=128,5	diff=227,404761905;high=450,154761905;low=222,75	diff=11620,31349203;high=21232,3551587;low=9612,04166667	diff=9079,087301520001;high=16743,1150793;low=7664,02777778	diff=12387,1031747;high=23904,561508;low=11517,4583333
NC_017022.1	terminator_00307	1146904	1146939	-	TransTermHP	EFAU004_RS05540	NC_017022.1_transcript1035	TRUE	diff=99,0;high=196,0;low=97,0	diff=92,0;high=175,0;low=83,0	diff=111,0;high=200,0;low=89,0	Not_detect	Not_detect	Not_detect
NC_017022.1	terminator_00308	1148966	1148998	-	TransTermHP	EFAU004_RS05550	NC_017022.1_transcript1035	TRUE	diff=291,0;high=352,0;low=61,0	diff=219,0;high=276,0;low=57,0	diff=385,0;high=457,0;low=72,0	diff=6825,0;high=6878,0;low=53,0	diff=4714,0;high=4756,0;low=42,0	diff=4359,0;high=4416,0;low=57,0
NC_017022.1	terminator_00309	1155037	1155082	-	gene_converged;TransTermHP	transcript_01038,EFAU004_RS05575	NC_017022.1_transcript1038	TRUE	diff=6,0;high=11,0;low=5,0	diff=9,0;high=16,0;low=7,0	diff=5,0;high=9,0;low=4,0	diff=2,0;high=3,0;low=1,0	diff=3,0;high=5,0;low=2,0	diff=5,0;high=9,0;low=4,0
NC_017022.1	terminator_00310	1159179	1159233	+	gene_converged;TransTermHP	transcript_01041,EFAU004_RS05595	NC_017022.1_transcript1041	TRUE	diff=6,166666666699999;high=10,1666666667;low=4,0	diff=7,0;high=12,0;low=5,0	diff=9,0;high=16,0;low=7,0	diff=6,0555555556;high=11,0555555556;low=5,0	diff=15,0;high=28,0;low=13,0	diff=7,050000000000001;high=13,05;low=6,0
NC_017022.1	terminator_00311	1159182	1159233	-	TransTermHP	EFAU004_RS05600	NC_017022.1_transcript1042	FALSE	Not_detect	Not_detect	Not_detect	Not_detect	Not_detect	Not_detect
NC_017022.1	terminator_00312	1160916	1160962	+	gene_converged;TransTermHP	EFAU004_RS05605	NC_017022.1_transcript1043	FALSE	Not_detect	Not_detect	Not_detect	Not_detect	Not_detect	Not_detect
NC_017022.1	terminator_00313	1167899	1167933	-	TransTermHP	EFAU004_RS05645	NC_017022.1_transcript1046	FALSE	Not_detect	Not_detect	Not_detect	Not_detect	Not_detect	Not_detect
NC_017022.1	terminator_00314	1170137	1170167	-	TransTermHP	EFAU004_RS05655	NC_017022.1_transcript1048	TRUE	diff=9,0;high=17,0;low=8,0	diff=11,0;high=19,0;low=8,0	diff=11,0;high=20,0;low=9,0	diff=9,0;high=15,0;low=6,0	diff=4,0;high=6,0;low=2,0	diff=8,0;high=15,0;low=7,0
NC_017022.1	terminator_00315	1171883	1171909	+	TransTermHP	EFAU004_RS05665	NC_017022.1_transcript1049	TRUE	diff=150,0;high=181,0;low=31,0	diff=173,0;high=199,0;low=26,0	diff=212,0;high=249,0;low=37,0	diff=348,0;high=405,0;low=57,0	diff=355,0;high=418,0;low=63,0	diff=518,0;high=591,0;low=73,0
NC_017022.1	terminator_00316	1172064	1172113	-	gene_converged;TransTermHP	transcript_01052	NC_017022.1_transcript1052	FALSE	Not_detect	Not_detect	Not_detect	Not_detect	Not_detect	Not_detect
NC_017022.1	terminator_00317	1173146	1173176	-	gene_converged	EFAU004_RS05680	NA	FALSE	Not_detect	Not_detect	Not_detect	Not_detect	Not_detect	Not_detect
NC_017022.1	terminator_00318	1173153	1173178	+	gene_converged	transcript_01054	NC_017022.1_transcript1054	TRUE	diff=1,0;high=1,0;low=0,0	diff=2,0;high=2,0;low=0,0	diff=2,0;high=3,0;low=1,0	diff=16,0;high=25,0;low=9,0	diff=13,0;high=21,0;low=8,0	diff=18,0;high=24,0;low=6,0
NC_017022.1	terminator_00319	1174441	1174467	+	gene_converged	transcript_01056	NC_017022.1_transcript1056	TRUE	diff=9,93333333336;high=19,0527777778;low=9,11944444444	diff=13,825000000000001;high=26,7083333333;low=12,8833333333	diff=18,052777777800003;high=35,7916666667;low=17,7388888889	diff=1271,892676764;high=2111,17323232;low=839,280555556	diff=0,333333333334;high=0,555555555556;low=0,222222222222	diff=1258,7060606010002;high=2126,24494949;low=867,538888889
NC_017022.1	terminator_00320	1175503	1175545	-	gene_converged;TransTermHP	EFAU004_RS05690	NC_017022.1_transcript1057	TRUE	diff=7,0;high=12,0;low=5,0	diff=5,0;high=6,0;low=1,0	diff=6,0;high=8,0;low=2,0	diff=6,0;high=8,0;low=2,0	diff=6,0;high=11,0;low=5,0	diff=4,0;high=7,0;low=3,0
NC_017022.1	terminator_00321	1177799	1177838	-	gene_converged;TransTermHP	transcript_01062	NC_017022.1_transcript1062	TRUE	diff=59,0;high=106,0;low=47,0	diff=55,0;high=104,0;low=49,0	diff=52,0;high=94,0;low=42,0	diff=36,0;high=69,0;low=33,0	diff=20,0;high=36,0;low=16,0	diff=24,0;high=46,0;low=22,0
NC_017022.1	terminator_00322	1181087	1181125	-	TransTermHP	EFAU004_RS05725	NC_017022.1_transcript1062	TRUE	Not_detect	Not_detect	diff=31,0;high=59,0;low=28,0	diff=41,0;high=79,0;low=38,0	diff=25,0;high=48,0;low=23,0	Not_detect
NC_017022.1	terminator_00323	1185246	1185256	-	TransTermHP	EFAU004_RS05740	NC_017022.1_transcript1065	TRUE	diff=7,0;high=10,0;low=3,0	diff=7,0;high=13,0;low=6,0	diff=5,0;high=6,0;low=1,0	diff=17,0;high=20,0;low=3,0	diff=13,0;high=18,0;low=5,0	diff=26,0;high=28,0;low=2,0
NC_017022.1	terminator_00324	1186829	1186864	-	gene_converged;TransTermHP	transcript_01069,EFAU004_RS05755	NC_017022.1_transcript1069	TRUE	diff=8,0;high=14,0;low=6,0	diff=8,0;high=15,0;low=7,0	diff=21,0;high=41,0;low=20,0	diff=11,0;high=16,0;low=5,0	diff=9,0;high=17,0;low=8,0	diff=13,0;high=22,0;low=9,0
NC_017022.1	terminator_00325	1190691	1190728	+	TransTermHP	EFAU004_RS05775	NC_017022.1_transcript1073	FALSE	Not_detect	Not_detect	Not_detect	Not_detect	Not_detect	Not_detect
NC_017022.1	terminator_00326	1191428	1191487	+	gene_converged	EFAU004_RS05780	NC_017022.1_transcript1074	FALSE	Not_detect	Not_detect	Not_detect	Not_detect	Not_detect	Not_detect
NC_017022.1	terminator_00327	1192795	1192835	-	TransTermHP	EFAU004_RS05790	NC_017022.1_transcript1075	TRUE	diff=32,0;high=63,0;low=31,0	diff=39,0;high=73,0;low=34,0	diff=39,0;high=71,0;low=32,0	diff=16,4583333333;high=26,4583333333;low=10,0	diff=10,0;high=19,0;low=9,0	diff=16,0;high=24,0;low=8,0
NC_017022.1	terminator_00328	1193896	1193925	-	TransTermHP	EFAU004_RS05795	NA	TRUE	diff=3,0;high=5,0;low=2,0	diff=8,0;high=15,0;low=7,0	diff=7,0;high=12,0;low=5,0	diff=3,0;high=4,0;low=1,0	diff=7,0;high=12,0;low=5,0	diff=2,0;high=2,0;low=0,0
NC_017022.1	terminator_00329	1203339	1203383	-	gene_converged;TransTermHP	transcript_01085,EFAU004_RS05825	NC_017022.1_transcript1085	TRUE	diff=10,0;high=16,0;low=6,0	diff=18,0;high=30,0;low=12,0	diff=16,0;high=23,0;low=7,0	diff=9,0;high=13,0;low=4,0	diff=18,0;high=30,0;low=12,0	diff=14,0;high=22,0;low=8,0
NC_017022.1	terminator_00330	1203346	1203375	+	TransTermHP	EFAU004_RS05820	NC_017022.1_transcript1082	FALSE	Not_detect	Not_detect	Not_detect	Not_detect	Not_detect	Not_detect
NC_017022.1	terminator_00331	1208080	1208109	-	gene_converged	EFAU004_RS05850	NC_017022.1_transcript1085	TRUE	diff=20,0;high=38,0;low=18,0	diff=26,0;high=48,0;low=22,0	diff=30,0;high=58,0;low=28,0	diff=863,0;high=1135,0;low=272,0	diff=720,0;high=974,0;low=254,0	diff=803,0;high=1110,0;low=307,0
NC_017022.1	terminator_00332	1211749	1211762	-	TransTermHP	EFAU004_RS05860	NC_017022.1_transcript1087	TRUE	diff=18,0;high=23,0;low=5,0	diff=31,0;high=35,0;low=4,0	diff=22,0;high=24,0;low=2,0	diff=661,0;high=674,0;low=13,0	diff=741,0;high=764,0;low=23,0	diff=698,0;high=712,0;low=14,0
NC_017022.1	terminator_00333	1215217	1215244	+	TransTermHP	EFAU004_RS05875	NA	TRUE	diff=1,0;high=1,0;low=0,0	diff=1,0;high=1,0;low=0,0	Not_detect	diff=13,0;high=13,0;low=0,0	diff=6,0;high=6,0;low=0,0	diff=8,0;high=9,0;low=1,0
NC_017022.1	terminator_00334	1215868	1215913	-	gene_converged;TransTermHP	EFAU004_RS05885	NC_017022.1_transcript1092	FALSE	Not_detect	Not_detect	Not_detect	Not_detect	Not_detect	Not_detect
NC_017022.1	terminator_00335	1217854	1217887	-	gene_converged	EFAU004_RS05905	NC_017022.1_transcript1094	TRUE	diff=10,0;high=18,0;low=8,0	Not_detect	Not_detect	Not_detect	diff=3,0;high=5,0;low=2,0	diff=5,0;high=9,0;low=4,0
NC_017022.1	terminator_00336	1219102	1219142	-	TransTermHP	EFAU004_RS05910	NC_017022.1_transcript1096	TRUE	diff=8,0;high=13,0;low=5,0	diff=10,0;high=18,0;low=8,0	diff=12,0;high=22,0;low=10,0	diff=17,0;high=31,0;low=14,0	diff=10,0;high=19,0;low=9,0	diff=9,0;high=16,0;low=7,0
NC_017022.1	terminator_00337	1220777	1220839	-	gene_converged;TransTermHP	EFAU004_RS05920	NC_017022.1_transcript1098	FALSE	Not_detect	Not_detect	Not_detect	Not_detect	Not_detect	Not_detect
NC_017022.1	terminator_00338	1220787	1220840	+	gene_converged;TransTermHP	EFAU004_RS05915	NC_017022.1_transcript1097	TRUE	diff=6,0;high=10,0;low=4,0	diff=3,0;high=4,0;low=1,0	diff=5,0;high=8,0;low=3,0	diff=3,0;high=4,0;low=1,0	diff=6,0;high=6,0;low=0,0	diff=5,0;high=9,0;low=4,0
NC_017022.1	terminator_00339	1227634	1227667	+	gene_converged	transcript_01105	NC_017022.1_transcript1105	TRUE	diff=1,0;high=1,0;low=0,0	diff=2,0;high=2,0;low=0,0	diff=2,0;high=2,0;low=0,0	diff=64,0;high=67,0;low=3,0	diff=65,0;high=71,0;low=6,0	diff=88,0;high=96,0;low=8,0
NC_017022.1	terminator_00340	1227673	1227716	-	TransTermHP	EFAU004_RS05950	NC_017022.1_transcript1106	TRUE	diff=10,0;high=18,0;low=8,0	diff=9,0;high=14,0;low=5,0	diff=6,0;high=10,0;low=4,0	diff=6,0;high=9,0;low=3,0	diff=4,0;high=6,0;low=2,0	diff=5,0;high=9,0;low=4,0
NC_017022.1	terminator_00341	1229008	1229018	-	TransTermHP	EFAU004_RS05955	NC_017022.1_transcript1106	TRUE	Not_detect	Not_detect	diff=21,0;high=40,0;low=19,0	diff=10,0;high=16,0;low=6,0	diff=6,0;high=9,0;low=3,0	diff=8,0;high=15,0;low=7,0
NC_017022.1	terminator_00342	1230405	1230466	+	gene_converged;TransTermHP	EFAU004_RS05960	NC_017022.1_transcript1107	FALSE	Not_detect	Not_detect	Not_detect	Not_detect	Not_detect	Not_detect
NC_017022.1	terminator_00343	1230406	1230466	-	gene_converged;TransTermHP	transcript_01108,EFAU004_RS05965	NC_017022.1_transcript1108	TRUE	diff=12,0;high=23,0;low=11,0	diff=13,0;high=23,0;low=10,0	diff=7,0;high=13,0;low=6,0	diff=5,0;high=8,0;low=3,0	diff=19,0;high=28,0;low=9,0	diff=6,0;high=10,0;low=4,0
NC_017022.1	terminator_00344	1233569	1233606	-	gene_converged;TransTermHP	EFAU004_RS05980	NC_017022.1_transcript1109	TRUE	diff=133,0;high=260,0;low=127,0	diff=186,0;high=370,0;low=184,0	diff=194,0;high=371,0;low=177,0	diff=159,0;high=297,0;low=138,0	diff=172,0;high=336,0;low=164,0	diff=156,0;high=298,0;low=142,0
NC_017022.1	terminator_00345	1235384	1235399	-	gene_converged	EFAU004_RS05990	NC_017022.1_transcript1111	TRUE	diff=13,0;high=25,0;low=12,0	Not_detect	Not_detect	diff=54,0;high=62,0;low=8,0	diff=48,0;high=58,0;low=10,0	diff=27,0;high=35,0;low=8,0
NC_017022.1	terminator_00346	1242102	1242128	-	TransTermHP	EFAU004_RS06025	NC_017022.1_transcript1117	TRUE	diff=4,0;high=7,0;low=3,0	diff=7,0;high=11,0;low=4,0	diff=7,0;high=11,0;low=4,0	diff=8,0;high=14,0;low=6,0	diff=3,0;high=4,0;low=1,0	diff=4,0;high=7,0;low=3,0
NC_017022.1	terminator_00347	1243622	1243634	-	TransTermHP	EFAU004_RS06030	NC_017022.1_transcript1117	TRUE	diff=123,0;high=239,0;low=116,0	diff=168,0;high=206,0;low=38,0	diff=184,0;high=252,0;low=68,0	diff=843,0;high=911,0;low=68,0	diff=765,0;high=807,0;low=42,0	diff=822,0;high=883,0;low=61,0
NC_017022.1	terminator_00348	1245595	1245614	-	TransTermHP	EFAU004_RS06035	NC_017022.1_transcript1119	TRUE	diff=11,0;high=19,0;low=8,0	diff=9,0;high=17,0;low=8,0	diff=9,0;high=17,0;low=8,0	diff=9,0;high=17,0;low=8,0	diff=8,0;high=15,0;low=7,0	diff=9,0;high=16,0;low=7,0
NC_017022.1	terminator_00349	1249968	1249989	-	TransTermHP	EFAU004_RS06065	NC_017022.1_transcript1122	TRUE	diff=99,0;high=101,0;low=2,0	diff=120,0;high=124,0;low=4,0	diff=153,0;high=159,0;low=6,0	diff=65,0;high=69,0;low=4,0	diff=60,0;high=69,0;low=9,0	diff=67,0;high=71,0;low=4,0
NC_017022.1	terminator_00350	1255563	1255610	+	gene_converged	transcript_01127	NC_017022.1_transcript1127	TRUE	Not_detect	diff=1,0;high=1,0;low=0,0	Not_detect	diff=16,0;high=16,0;low=0,0	diff=16,0;high=25,0;low=9,0	diff=19,0;high=28,0;low=9,0
NC_017022.1	terminator_00351	1256979	1257013	-	gene_converged;TransTermHP	EFAU004_RS06090	NC_017022.1_transcript1126	TRUE	diff=60,0;high=88,0;low=28,0	diff=47,0;high=68,0;low=21,0	diff=90,0;high=119,0;low=29,0	diff=3201,0;high=6183,0;low=2982,0	diff=2226,0;high=4448,0;low=2222,0	diff=2659,0;high=5266,0;low=2607,0
NC_017022.1	terminator_00352	1259514	1259569	-	TransTermHP	EFAU004_RS06095	NC_017022.1_transcript1129	TRUE	diff=6,0;high=11,0;low=5,0	diff=10,0;high=19,0;low=9,0	diff=9,0;high=17,0;low=8,0	diff=9,0;high=17,0;low=8,0	diff=15,0;high=28,0;low=13,0	diff=11,0;high=21,0;low=10,0
NC_017022.1	terminator_00353	1266902	1266929	-	gene_converged	transcript_01136,EFAU004_RS06125	NC_017022.1_transcript1136	TRUE	diff=5,0;high=8,0;low=3,0	diff=4,0;high=5,0;low=1,0	diff=5,5;high=8,0;low=2,5	diff=103,9;high=122,0;low=18,1	diff=84,0;high=96,0;low=12,0	diff=136,0;high=162,0;low=26,0
NC_017022.1	terminator_00354	1269319	1269354	+	TransTermHP	EFAU004_RS06135	NC_017022.1_transcript1138	TRUE	diff=6,0;high=7,0;low=1,0	diff=8,0;high=14,0;low=6,0	diff=5,0;high=8,0;low=3,0	diff=3,0;high=4,0;low=1,0	diff=1,0;high=1,0;low=0,0	diff=2,0;high=3,0;low=1,0
NC_017022.1	terminator_00355	1270224	1270246	+	TransTermHP	EFAU004_RS06140	NC_017022.1_transcript1139	FALSE	Not_detect	Not_detect	Not_detect	Not_detect	Not_detect	Not_detect
NC_017022.1	terminator_00356	1270425	1270518	-	gene_converged	EFAU004_RS15310	NC_017022.1_transcript1141	TRUE	diff=20,0;high=22,0;low=2,0	diff=17,0;high=23,0;low=6,0	diff=26,0;high=32,0;low=6,0	diff=11,0;high=11,0;low=0,0	diff=19,0;high=20,0;low=1,0	diff=17,0;high=18,0;low=1,0
NC_017022.1	terminator_00357	1274328	1274354	+	TransTermHP	EFAU004_RS06155	NC_017022.1_transcript1142	FALSE	Not_detect	Not_detect	Not_detect	Not_detect	Not_detect	Not_detect
NC_017022.1	terminator_00358	1279949	1279979	+	TransTermHP	EFAU004_RS06170	NC_017022.1_transcript1147	TRUE	diff=6,0;high=11,0;low=5,0	diff=7,0;high=12,0;low=5,0	diff=12,0;high=14,0;low=2,0	diff=16,0;high=31,0;low=15,0	Not_detect	Not_detect
NC_017022.1	terminator_00359	1280037	1280061	-	gene_converged	transcript_01149,EFAU004_RS06175	NC_017022.1_transcript1149	TRUE	diff=7,25;high=13,5;low=6,25	diff=7,99999999999;high=14,0588235294;low=6,05882352941	diff=14,91666666667;high=24,0;low=9,08333333333	diff=9,81527777778;high=18,0;low=8,18472222222	diff=6,9375;high=13,0;low=6,0625	diff=7,8041666667;high=15,1666666667;low=7,3625
NC_017022.1	terminator_00360	1283752	1283797	-	TransTermHP	EFAU004_RS06200	NC_017022.1_transcript1153	FALSE	Not_detect	Not_detect	Not_detect	Not_detect	Not_detect	Not_detect
NC_017022.1	terminator_00361	1290054	1290064	+	TransTermHP	EFAU004_RS06230	NC_017022.1_transcript1158	TRUE	diff=1,0;high=1,0;low=0,0	diff=1,0;high=1,0;low=0,0	Not_detect	diff=35,0;high=63,0;low=28,0	diff=21,0;high=38,0;low=17,0	diff=42,0;high=76,0;low=34,0
NC_017022.1	terminator_00362	1294574	1294600	-	TransTermHP	EFAU004_RS06260	NC_017022.1_transcript1159	TRUE	Not_detect	Not_detect	Not_detect	diff=34,1833333333;high=56,2333333333;low=22,05	diff=57,800000000000004;high=94,45;low=36,65	diff=55,9833333333;high=95,5833333333;low=39,6
NC_017022.1	terminator_00363	1298110	1298131	+	gene_converged	transcript_01162	NC_017022.1_transcript1162	TRUE	diff=14,6452380952;high=28,3987179487;low=13,7534798535	diff=19,2509157509;high=35,6956043956;low=16,4446886447	diff=23,586630036600003;high=46,6402930403;low=23,0536630037	diff=983,9642857179999;high=1746,35586081;low=762,391575092	diff=723,408333329;high=1325,00888278;low=601,600549451	diff=915,954761907;high=1678,06794872;low=762,113186813
NC_017022.1	terminator_00364	1298211	1298255	-	gene_converged	transcript_01163,EFAU004_RS06275	NC_017022.1_transcript1163	FALSE	Not_detect	Not_detect	Not_detect	Not_detect	Not_detect	Not_detect
NC_017022.1	terminator_00365	1318774	1318804	-	TransTermHP	EFAU004_RS06380	NC_017022.1_transcript1174	TRUE	diff=289,5;high=326,0;low=36,5	diff=436,5;high=490,5;low=54,0	diff=422,5;high=493,0;low=70,5	diff=78,5;high=126,0;low=47,5	diff=42,5;high=76,0;low=33,5	diff=122,5;high=187,5;low=65,0
NC_017022.1	terminator_00366	1319108	1319127	-	TransTermHP	EFAU004_RS06395	NC_017022.1_transcript1176	TRUE	diff=506,5;high=655,5;low=149,0	diff=621,5;high=829,5;low=208,0	diff=635,0;high=896,0;low=261,0	diff=1358,0;high=1501,5;low=143,5	diff=968,5;high=1122,0;low=153,5	diff=2001,5;high=2172,5;low=171,0
NC_017022.1	terminator_00367	1319239	1319249	-	TransTermHP	EFAU004_RS06400	NC_017022.1_transcript1176	TRUE	diff=383,0;high=578,0;low=195,0	diff=523,0;high=755,0;low=232,0	diff=567,0;high=797,0;low=230,0	diff=2025,0;high=2037,0;low=12,0	diff=1607,0;high=1631,0;low=24,0	diff=2130,0;high=2154,0;low=24,0
NC_017022.1	terminator_00368	1319445	1319459	-	TransTermHP	EFAU004_RS06410	NC_017022.1_transcript1177	TRUE	diff=70,5;high=86,5;low=16,0	diff=97,0;high=123,5;low=26,5	diff=90,5;high=122,5;low=32,0	diff=27,0;high=45,0;low=18,0	diff=29,0;high=47,0;low=18,0	diff=14,5;high=28,5;low=14,0
NC_017022.1	terminator_00369	1319600	1319614	-	TransTermHP	EFAU004_RS06420	NC_017022.1_transcript1177	TRUE	diff=2379,5;high=2553,5;low=174,0	diff=3206,5;high=3475,0;low=268,5	diff=3652,0;high=3941,5;low=289,5	diff=1134,0;high=1248,5;low=114,5	diff=1120,5;high=1233,5;low=113,0	diff=1220,0;high=1351,5;low=131,5
NC_017022.1	terminator_00370	1319778	1319789	-	TransTermHP	EFAU004_RS06430	NC_017022.1_transcript1177	TRUE	diff=6162,0;high=7128,0;low=966,0	diff=8269,0;high=9599,0;low=1330,0	diff=9502,0;high=11028,0;low=1526,0	diff=22070,0;high=39164,0;low=17094,0	diff=20441,0;high=28296,0;low=7855,0	diff=30685,0;high=46223,0;low=15538,0
NC_017022.1	terminator_00371	1320050	1320062	-	TransTermHP	EFAU004_RS06445	NC_017022.1_transcript1177	TRUE	diff=513,0;high=617,0;low=104,0	diff=621,5;high=797,5;low=176,0	diff=650,0;high=830,5;low=180,5	diff=185,5;high=264,5;low=79,0	diff=260,5;high=352,5;low=92,0	diff=206,16666666700002;high=289,166666667;low=83,0
NC_017022.1	terminator_00372	1323678	1323705	-	gene_converged	EFAU004_RS06465	NC_017022.1_transcript1178	TRUE	diff=34,7090909091;high=54,9727272727;low=20,2636363636	diff=37,14545454539999;high=72,9818181818;low=35,8363636364	diff=33,973262032099996;high=58,6484848485;low=24,6752228164	diff=86,7236185381;high=158,174242424;low=71,4506238859	diff=64,2475044559;high=127,992424242;low=63,7449197861	diff=52,3780748663;high=99,303030303;low=46,9249554367
NC_017022.1	terminator_00373	1328361	1328396	-	TransTermHP	EFAU004_RS06480	NC_017022.1_transcript1180	TRUE	Not_detect	Not_detect	Not_detect	diff=19,0;high=32,0;low=13,0	diff=12,0;high=22,0;low=10,0	diff=17,0;high=29,0;low=12,0
NC_017022.1	terminator_00374	1329977	1330012	-	TransTermHP	EFAU004_RS06485	NC_017022.1_transcript1181	TRUE	diff=33,0;high=65,0;low=32,0	diff=44,0;high=80,0;low=36,0	diff=53,0;high=95,0;low=42,0	diff=46,0;high=90,0;low=44,0	diff=45,0;high=85,0;low=40,0	diff=49,0;high=96,0;low=47,0
NC_017022.1	terminator_00375	1330236	1330260	-	TransTermHP	EFAU004_RS06490	NC_017022.1_transcript1181	TRUE	diff=204,0;high=401,0;low=197,0	diff=196,0;high=383,0;low=187,0	diff=389,0;high=697,0;low=308,0	Not_detect	Not_detect	Not_detect
NC_017022.1	terminator_00376	1331910	1331954	+	gene_converged;TransTermHP	EFAU004_RS06495	NC_017022.1_transcript1182	FALSE	Not_detect	Not_detect	Not_detect	Not_detect	Not_detect	Not_detect
NC_017022.1	terminator_00377	1331916	1331939	-	TransTermHP	EFAU004_RS06500	NC_017022.1_transcript1183	FALSE	Not_detect	Not_detect	Not_detect	Not_detect	Not_detect	Not_detect
NC_017022.1	terminator_00378	1338691	1338721	+	gene_converged;TransTermHP	EFAU004_RS06515	NC_017022.1_transcript1186	TRUE	diff=5,0;high=9,0;low=4,0	diff=10,0;high=16,0;low=6,0	diff=14,0;high=22,0;low=8,0	diff=15,0;high=20,0;low=5,0	diff=13,0;high=23,0;low=10,0	diff=14,0;high=23,0;low=9,0
NC_017022.1	terminator_00379	1340490	1340513	+	gene_converged	transcript_01189	NC_017022.1_transcript1189	TRUE	Not_detect	diff=2,0;high=2,0;low=0,0	Not_detect	diff=8,0;high=12,0;low=4,0	diff=9,0;high=11,0;low=2,0	diff=7,0;high=11,0;low=4,0
NC_017022.1	terminator_00380	1342663	1342704	+	gene_converged;TransTermHP	transcript_01192,EFAU004_RS06530	NC_017022.1_transcript1192	TRUE	diff=4,0;high=7,0;low=3,0	diff=3,0;high=5,0;low=2,0	diff=9,0;high=13,0;low=4,0	diff=2,0;high=3,0;low=1,0	diff=4,0;high=7,0;low=3,0	diff=7,0;high=10,0;low=3,0
NC_017022.1	terminator_00381	1344265	1344293	-	gene_converged	EFAU004_RS06540	NC_017022.1_transcript1194	TRUE	diff=14,0;high=26,0;low=12,0	diff=13,0;high=23,0;low=10,0	diff=15,0;high=28,0;low=13,0	diff=10,0;high=18,0;low=8,0	diff=11,0;high=19,0;low=8,0	diff=14,0;high=20,0;low=6,0
NC_017022.1	terminator_00382	1349863	1349893	-	TransTermHP	EFAU004_RS06555	NC_017022.1_transcript1198	TRUE	diff=20,0;high=38,0;low=18,0	diff=34,0;high=66,0;low=32,0	diff=36,0;high=69,0;low=33,0	diff=67,0;high=125,0;low=58,0	diff=63,0;high=114,0;low=51,0	diff=63,0;high=121,0;low=58,0
NC_017022.1	terminator_00383	1357728	1357744	-	TransTermHP	EFAU004_RS06585	NC_017022.1_transcript1204	TRUE	diff=13,0;high=25,0;low=12,0	diff=15,0;high=19,0;low=4,0	diff=18,0;high=34,0;low=16,0	diff=16,0;high=28,0;low=12,0	diff=8,0;high=14,0;low=6,0	diff=13,0;high=23,0;low=10,0
NC_017022.1	terminator_00384	1362227	1362252	-	TransTermHP	EFAU004_RS06620	NC_017022.1_transcript1204	TRUE	diff=130,0;high=250,0;low=120,0	diff=143,0;high=277,0;low=134,0	diff=180,0;high=359,0;low=179,0	Not_detect	Not_detect	Not_detect
NC_017022.1	terminator_00385	1369313	1369348	-	TransTermHP	EFAU004_RS06660	NC_017022.1_transcript1204	TRUE	diff=216,0;high=398,0;low=182,0	Not_detect	Not_detect	diff=207,0;high=385,0;low=178,0	diff=189,0;high=374,0;low=185,0	diff=223,0;high=440,0;low=217,0
NC_017022.1	terminator_00386	1372305	1372343	+	TransTermHP	EFAU004_RS06675	NC_017022.1_transcript1205	FALSE	Not_detect	Not_detect	Not_detect	Not_detect	Not_detect	Not_detect
NC_017022.1	terminator_00387	1372305	1372343	-	TransTermHP	EFAU004_RS06680	NC_017022.1_transcript1207	TRUE	diff=18,0;high=25,0;low=7,0	diff=32,0;high=46,0;low=14,0	diff=26,0;high=40,0;low=14,0	diff=24,0;high=42,0;low=18,0	diff=30,0;high=46,0;low=16,0	diff=29,0;high=53,0;low=24,0
NC_017022.1	terminator_00388	1373572	1373589	-	gene_converged	EFAU004_RS06690	NC_017022.1_transcript1207	TRUE	diff=88,0;high=117,0;low=29,0	diff=95,0;high=135,0;low=40,0	diff=118,0;high=157,0;low=39,0	diff=690,0;high=761,0;low=71,0	diff=621,0;high=675,0;low=54,0	diff=629,0;high=697,0;low=68,0
NC_017022.1	terminator_00389	1376082	1376111	-	TransTermHP	EFAU004_RS06700	NC_017022.1_transcript1210	TRUE	diff=8,0;high=15,0;low=7,0	diff=9,0;high=16,0;low=7,0	diff=17,0;high=26,0;low=9,0	diff=39,0;high=56,0;low=17,0	diff=21,0;high=40,0;low=19,0	diff=45,0;high=67,0;low=22,0
NC_017022.1	terminator_00390	1380847	1380885	+	TransTermHP	EFAU004_RS06710	NC_017022.1_transcript1212	FALSE	Not_detect	Not_detect	Not_detect	Not_detect	Not_detect	Not_detect
NC_017022.1	terminator_00391	1381333	1381360	+	gene_converged	EFAU004_RS06715	NC_017022.1_transcript1214	TRUE	diff=40,9;high=70,0;low=29,1	diff=38,0;high=75,0;low=37,0	diff=37,0;high=60,0;low=23,0	diff=13,0;high=20,0;low=7,0	diff=24,0;high=47,0;low=23,0	diff=12,9;high=25,0;low=12,1
NC_017022.1	terminator_00392	1385180	1385207	-	gene_converged	EFAU004_RS06735	NC_017022.1_transcript1217	TRUE	diff=13,0;high=24,0;low=11,0	diff=16,0;high=30,0;low=14,0	diff=16,0;high=31,0;low=15,0	diff=13,0;high=24,0;low=11,0	diff=10,0;high=18,0;low=8,0	diff=12,0;high=22,0;low=10,0
NC_017022.1	terminator_00393	1387134	1387171	+	TransTermHP	EFAU004_RS06740	NC_017022.1_transcript1220	TRUE	diff=10,0;high=15,0;low=5,0	diff=4,0;high=6,0;low=2,0	diff=2,0;high=3,0;low=1,0	diff=12,0;high=14,0;low=2,0	diff=11,0;high=13,0;low=2,0	diff=7,0;high=10,0;low=3,0
NC_017022.1	terminator_00394	1387134	1387171	-	TransTermHP	EFAU004_RS06745	NC_017022.1_transcript1222	TRUE	diff=36,0;high=57,0;low=21,0	diff=26,0;high=49,0;low=23,0	diff=30,0;high=56,0;low=26,0	diff=32,0;high=53,0;low=21,0	diff=30,0;high=57,0;low=27,0	diff=38,0;high=56,0;low=18,0
NC_017022.1	terminator_00395	1391397	1391438	-	gene_converged;TransTermHP	EFAU004_RS06765	NC_017022.1_transcript1227	FALSE	Not_detect	Not_detect	Not_detect	Not_detect	Not_detect	Not_detect
NC_017022.1	terminator_00396	1392846	1392901	-	gene_converged;TransTermHP	EFAU004_RS06775	NC_017022.1_transcript1230	TRUE	diff=9,0;high=17,0;low=8,0	diff=9,0;high=16,0;low=7,0	diff=12,0;high=23,0;low=11,0	diff=6,0;high=11,0;low=5,0	diff=11,0;high=19,0;low=8,0	diff=11,0;high=18,0;low=7,0
NC_017022.1	terminator_00397	1392853	1392897	+	TransTermHP	EFAU004_RS06770	NC_017022.1_transcript1229	TRUE	diff=11,0;high=18,0;low=7,0	diff=7,0;high=12,0;low=5,0	diff=5,0;high=9,0;low=4,0	diff=12,0;high=23,0;low=11,0	diff=9,0;high=17,0;low=8,0	diff=10,0;high=19,0;low=9,0
NC_017022.1	terminator_00398	1394859	1394884	-	TransTermHP	EFAU004_RS06780	NC_017022.1_transcript1232	TRUE	diff=36,0;high=69,0;low=33,0	diff=39,0;high=77,0;low=38,0	diff=49,0;high=93,0;low=44,0	diff=70,0;high=132,0;low=62,0	diff=43,0;high=82,0;low=39,0	diff=55,5;high=106,0;low=50,5
NC_017022.1	terminator_00399	1399455	1399503	-	gene_converged;TransTermHP	EFAU004_RS06810	NC_017022.1_transcript1237	TRUE	diff=8,0;high=14,0;low=6,0	diff=3,0;high=5,0;low=2,0	diff=4,0;high=6,0;low=2,0	diff=5,0;high=7,0;low=2,0	diff=4,0;high=7,0;low=3,0	diff=3,0;high=5,0;low=2,0
NC_017022.1	terminator_00400	1399459	1399502	+	gene_converged;TransTermHP	EFAU004_RS06805	NC_017022.1_transcript1236	FALSE	Not_detect	Not_detect	Not_detect	Not_detect	Not_detect	Not_detect
NC_017022.1	terminator_00401	1403037	1403081	-	gene_converged	EFAU004_RS06835	NC_017022.1_transcript1238	TRUE	diff=13,0;high=19,0;low=6,0	diff=19,0;high=35,0;low=16,0	diff=22,0;high=42,0;low=20,0	diff=2,0;high=2,0;low=0,0	diff=119,0;high=177,0;low=58,0	diff=123,0;high=189,0;low=66,0
NC_017022.1	terminator_00402	1412275	1412325	-	gene_converged	EFAU004_RS06875	NC_017022.1_transcript1250	TRUE	diff=24,0;high=47,0;low=23,0	diff=28,0;high=54,0;low=26,0	diff=21,0;high=40,0;low=19,0	diff=18,0;high=32,0;low=14,0	diff=16,0;high=31,0;low=15,0	diff=20,0;high=36,0;low=16,0
NC_017022.1	terminator_00403	1423662	1423685	+	gene_converged	transcript_01252	NC_017022.1_transcript1252	TRUE	diff=2,0;high=2,0;low=0,0	Not_detect	diff=3,0;high=4,0;low=1,0	diff=25,0;high=25,0;low=0,0	diff=33,0;high=36,0;low=3,0	diff=19,0;high=35,0;low=16,0
NC_017022.1	terminator_00404	1424258	1424287	-	gene_converged	EFAU004_RS15350	NC_017022.1_transcript1250	TRUE	Not_detect	diff=17,0;high=32,0;low=15,0	Not_detect	diff=26,0;high=43,0;low=17,0	diff=28,0;high=54,0;low=26,0	diff=21,0;high=40,0;low=19,0
NC_017022.1	terminator_00405	1425757	1425770	-	TransTermHP	EFAU004_RS06945	NC_017022.1_transcript1253	TRUE	diff=38,0;high=72,0;low=34,0	diff=25,0;high=47,0;low=22,0	diff=38,0;high=74,0;low=36,0	diff=22,0;high=39,0;low=17,0	diff=11,0;high=19,0;low=8,0	Not_detect
NC_017022.1	terminator_00406	1431024	1431075	-	gene_converged;TransTermHP	transcript_01256,EFAU004_RS06965	NC_017022.1_transcript1256	TRUE	diff=4,0;high=7,0;low=3,0	diff=8,0;high=14,0;low=6,0	diff=4,0;high=7,0;low=3,0	diff=5,0;high=9,0;low=4,0	Not_detect	diff=5,0;high=8,0;low=3,0
NC_017022.1	terminator_00407	1436844	1436883	-	gene_converged	EFAU004_RS06985	NC_017022.1_transcript1257	TRUE	Not_detect	Not_detect	Not_detect	diff=7,0;high=11,0;low=4,0	diff=237,0;high=250,0;low=13,0	diff=16,0;high=24,0;low=8,0
NC_017022.1	terminator_00408	1449895	1449942	+	gene_converged;TransTermHP	EFAU004_RS07045	NC_017022.1_transcript1265	FALSE	Not_detect	Not_detect	Not_detect	Not_detect	Not_detect	Not_detect
NC_017022.1	terminator_00409	1450781	1450803	-	gene_converged	transcript_01268	NC_017022.1_transcript1268	TRUE	diff=2,0;high=3,0;low=1,0	Not_detect	Not_detect	diff=27,0;high=27,0;low=0,0	diff=14,0;high=15,0;low=1,0	diff=18,0;high=18,0;low=0,0
NC_017022.1	terminator_00410	1453935	1453961	-	gene_converged	transcript_01272	NC_017022.1_transcript1272	TRUE	diff=3,0;high=3,0;low=0,0	diff=1,0;high=1,0;low=0,0	diff=4,0;high=4,0;low=0,0	diff=68,0;high=68,0;low=0,0	diff=72,0;high=72,0;low=0,0	diff=116,0;high=117,0;low=1,0
NC_017022.1	terminator_00411	1454689	1454749	-	gene_converged;TransTermHP	EFAU004_RS07070	NC_017022.1_transcript1273	TRUE	diff=28,5;high=52,0;low=23,5	diff=23,5;high=44,0;low=20,5	diff=26,5;high=52,5;low=26,0	diff=17,0;high=32,5;low=15,5	diff=21,0;high=38,0;low=17,0	diff=16,5;high=29,0;low=12,5
NC_017022.1	terminator_00412	1456639	1456662	-	gene_converged	transcript_01277	NC_017022.1_transcript1277	TRUE	diff=8,41666666667;high=16,5;low=8,08333333333	diff=6,500000000029999;high=11,6666666667;low=5,16666666667	diff=6,08333333337;high=11,6666666667;low=5,58333333333	diff=5,5;high=10,5;low=5,0	Not_detect	diff=2,1666666666600003;high=3,83333333333;low=1,66666666667
NC_017022.1	terminator_00413	1457123	1457144	+	TransTermHP	EFAU004_RS07085	NC_017022.1_transcript1278	TRUE	diff=6,0;high=11,0;low=5,0	diff=7,0;high=13,0;low=6,0	diff=9,5;high=16,0;low=6,5	diff=2,0;high=3,0;low=1,0	diff=2,5;high=3,0;low=0,5	diff=3,0;high=5,5;low=2,5
NC_017022.1	terminator_00414	1458575	1458603	-	gene_converged;TransTermHP	EFAU004_RS07100	NC_017022.1_transcript1280	TRUE	diff=6,999999999970001;high=13,3333333333;low=6,33333333333	diff=5,0;high=9,66666666667;low=4,66666666667	diff=10,5;high=20,5;low=10,0	diff=148,49999999999997;high=291,833333333;low=143,333333333	diff=146,4999999997;high=233,833333333;low=87,3333333333	diff=142,16666666700002;high=274,666666667;low=132,5
NC_017022.1	terminator_00415	1480810	1480834	-	TransTermHP	EFAU004_RS07230	NC_017022.1_transcript1295	TRUE	diff=7,5;high=12,0;low=4,5	diff=4,0;high=7,5;low=3,5	diff=6,5;high=12,5;low=6,0	diff=1210,0;high=1218,0;low=8,0	diff=882,833333333;high=889,333333333;low=6,5	diff=1501,83333333;high=1510,83333333;low=9,0
NC_017022.1	terminator_00416	1490974	1490995	-	gene_converged	transcript_01307	NC_017022.1_transcript1307	TRUE	diff=1,166666666667;high=1,5;low=0,333333333333	diff=1,5;high=1,5;low=0,0	diff=1,5000000000000002;high=2,83333333333;low=1,33333333333	diff=95,0;high=180,5;low=85,5	diff=85,0;high=130,0;low=45,0	diff=84,5;high=154,0;low=69,5
NC_017022.1	terminator_00417	1494424	1494474	-	gene_converged;TransTermHP	EFAU004_RS07360	NC_017022.1_transcript1314	TRUE	diff=137,0;high=273,0;low=136,0	diff=112,0;high=217,0;low=105,0	diff=153,0;high=305,0;low=152,0	diff=154,0;high=301,0;low=147,0	diff=90,5;high=173,0;low=82,5	diff=106,5;high=207,0;low=100,5
NC_017022.1	terminator_00418	1496422	1496456	+	gene_converged	transcript_01315	NC_017022.1_transcript1315	TRUE	diff=27,0;high=28,0;low=1,0	diff=40,0;high=42,0;low=2,0	diff=21,0;high=23,0;low=2,0	diff=7,0;high=13,0;low=6,0	diff=10,0;high=18,0;low=8,0	diff=9,0;high=17,0;low=8,0
NC_017022.1	terminator_00419	1497650	1497690	-	gene_converged	transcript_01319	NC_017022.1_transcript1319	TRUE	Not_detect	diff=1,0;high=1,0;low=0,0	Not_detect	diff=8,0;high=11,0;low=3,0	diff=9,0;high=11,0;low=2,0	diff=10,0;high=12,0;low=2,0
NC_017022.1	terminator_00420	1498946	1498977	-	gene_converged	EFAU004_RS07395	NC_017022.1_transcript1322	TRUE	diff=27,8333333333;high=55,0;low=27,1666666667	diff=29,0;high=54,0;low=25,0	diff=17,0;high=30,0;low=13,0	diff=21,0;high=40,0;low=19,0	diff=14,9565217391;high=27,0;low=12,0434782609	diff=12,0;high=22,0;low=10,0
NC_017022.1	terminator_00421	1502473	1502496	+	gene_converged	transcript_01326	NC_017022.1_transcript1326	TRUE	diff=2,0;high=3,0;low=1,0	diff=2,0;high=3,0;low=1,0	diff=1,0;high=1,0;low=0,0	diff=57,0;high=57,0;low=0,0	diff=38,0;high=38,0;low=0,0	diff=26,0;high=51,0;low=25,0
NC_017022.1	terminator_00422	1507083	1507134	-	gene_converged;TransTermHP	EFAU004_RS07450	NA	FALSE	Not_detect	Not_detect	Not_detect	Not_detect	Not_detect	Not_detect
NC_017022.1	terminator_00423	1507769	1507807	+	TransTermHP	EFAU004_RS07455	NC_017022.1_transcript1333	FALSE	Not_detect	Not_detect	Not_detect	Not_detect	Not_detect	Not_detect
NC_017022.1	terminator_00424	1508898	1508908	-	TransTermHP	EFAU004_RS07475	NC_017022.1_transcript1335	TRUE	diff=1,0;high=1,0;low=0,0	diff=3,0;high=3,0;low=0,0	Not_detect	diff=42,0;high=47,0;low=5,0	diff=41,0;high=42,0;low=1,0	diff=60,0;high=63,0;low=3,0
NC_017022.1	terminator_00425	1511489	1511545	+	gene_converged;TransTermHP	EFAU004_RS07480	NC_017022.1_transcript1338	FALSE	Not_detect	Not_detect	Not_detect	Not_detect	Not_detect	Not_detect
NC_017022.1	terminator_00426	1511601	1511624	-	TransTermHP	EFAU004_RS07485	NC_017022.1_transcript1339	TRUE	diff=5,0;high=9,0;low=4,0	diff=7,0;high=13,0;low=6,0	diff=8,0;high=8,0;low=0,0	diff=14,0;high=22,0;low=8,0	diff=5,0;high=8,0;low=3,0	diff=7,0;high=12,0;low=5,0
NC_017022.1	terminator_00427	1525582	1525617	+	gene_converged	transcript_01346	NC_017022.1_transcript1346	TRUE	Not_detect	Not_detect	diff=1,0;high=1,0;low=0,0	diff=50,0;high=52,0;low=2,0	diff=33,0;high=34,0;low=1,0	diff=55,0;high=55,0;low=0,0
NC_017022.1	terminator_00428	1528376	1528396	+	gene_converged	transcript_01349	NC_017022.1_transcript1349	TRUE	Not_detect	diff=1,0;high=1,0;low=0,0	Not_detect	diff=12,0;high=12,0;low=0,0	diff=14,0;high=14,0;low=0,0	diff=17,0;high=29,0;low=12,0
NC_017022.1	terminator_00429	1532513	1532530	+	gene_converged	EFAU004_RS07605	NC_017022.1_transcript1355	TRUE	diff=16,0;high=30,0;low=14,0	diff=11,0;high=20,0;low=9,0	Not_detect	diff=12,0;high=20,0;low=8,0	diff=14,0;high=25,0;low=11,0	diff=14,0;high=20,0;low=6,0
NC_017022.1	terminator_00430	1535594	1535620	-	TransTermHP	EFAU004_RS07625	NC_017022.1_transcript1357	TRUE	Not_detect	Not_detect	Not_detect	diff=36,0833333333;high=65,9333333333;low=29,85	diff=55,45;high=104,4;low=48,95	diff=57,16666666700001;high=109,566666667;low=52,4
NC_017022.1	terminator_00431	1542368	1542392	+	TransTermHP	EFAU004_RS07660	NC_017022.1_transcript1363	FALSE	Not_detect	Not_detect	Not_detect	Not_detect	Not_detect	Not_detect
NC_017022.1	terminator_00432	1554345	1554381	+	gene_converged	transcript_01374	NC_017022.1_transcript1374	TRUE	Not_detect	Not_detect	Not_detect	diff=31,0;high=55,0;low=24,0	diff=22,0;high=31,0;low=9,0	diff=35,0;high=60,0;low=25,0
NC_017022.1	terminator_00433	1554348	1554373	-	TransTermHP	EFAU004_RS07710	NC_017022.1_transcript1375	TRUE	diff=4,0;high=7,0;low=3,0	diff=3,0;high=4,0;low=1,0	diff=3,0;high=4,0;low=1,0	diff=12,0;high=18,0;low=6,0	diff=10,3333333333;high=17,3333333333;low=7,0	diff=8,0;high=15,0;low=7,0
NC_017022.1	terminator_00434	1556672	1556702	-	TransTermHP	EFAU004_RS07725	NC_017022.1_transcript1375	TRUE	diff=126,0;high=162,0;low=36,0	diff=107,0;high=141,0;low=34,0	diff=108,0;high=145,0;low=37,0	diff=2517,0;high=2556,0;low=39,0	diff=2018,0;high=2050,0;low=32,0	diff=1558,0;high=1596,0;low=38,0
NC_017022.1	terminator_00435	1559882	1559920	-	TransTermHP	EFAU004_RS07740	NA	FALSE	Not_detect	Not_detect	Not_detect	Not_detect	Not_detect	Not_detect
NC_017022.1	terminator_00436	1568250	1568284	-	TransTermHP	EFAU004_RS07780	NC_017022.1_transcript1379	TRUE	diff=23,0;high=25,0;low=2,0	diff=38,0;high=39,0;low=1,0	diff=46,0;high=51,0;low=5,0	diff=72,0;high=72,0;low=0,0	diff=52,0;high=57,0;low=5,0	diff=69,0;high=73,0;low=4,0
NC_017022.1	terminator_00437	1569706	1569736	-	TransTermHP	EFAU004_RS07790	NC_017022.1_transcript1380	TRUE	diff=10,0;high=18,0;low=8,0	diff=15,0;high=28,0;low=13,0	diff=11,0;high=17,0;low=6,0	diff=10,0;high=18,0;low=8,0	diff=10,0;high=18,0;low=8,0	diff=7,0;high=13,0;low=6,0
NC_017022.1	terminator_00438	1571076	1571103	+	gene_converged	transcript_01381	NC_017022.1_transcript1381	TRUE	diff=1,0;high=1,0;low=0,0	diff=1,0;high=1,0;low=0,0	diff=2,0;high=2,0;low=0,0	diff=55,0;high=68,0;low=13,0	diff=45,0;high=57,0;low=12,0	diff=57,0;high=74,0;low=17,0
NC_017022.1	terminator_00439	1574787	1574839	-	gene_converged;TransTermHP	EFAU004_RS07810	NC_017022.1_transcript1385	TRUE	diff=16,0;high=29,0;low=13,0	diff=13,0;high=24,0;low=11,0	diff=13,0;high=24,0;low=11,0	diff=26,0;high=49,0;low=23,0	diff=20,0;high=39,0;low=19,0	diff=16,0;high=30,0;low=14,0
NC_017022.1	terminator_00440	1577336	1577366	-	TransTermHP	EFAU004_RS07825	NC_017022.1_transcript1389	TRUE	diff=7,0;high=12,0;low=5,0	diff=4,0;high=6,0;low=2,0	diff=9,0;high=16,0;low=7,0	diff=21,0;high=36,0;low=15,0	diff=11,0;high=21,0;low=10,0	diff=16,0;high=31,0;low=15,0
NC_017022.1	terminator_00441	1579300	1579334	-	TransTermHP	EFAU004_RS07830	NC_017022.1_transcript1390	FALSE	Not_detect	Not_detect	Not_detect	Not_detect	Not_detect	Not_detect
NC_017022.1	terminator_00442	1581161	1581171	-	TransTermHP	EFAU004_RS07845	NC_017022.1_transcript1390	TRUE	diff=34,0;high=55,0;low=21,0	Not_detect	diff=32,0;high=63,0;low=31,0	diff=2205,0;high=2227,0;low=22,0	diff=1645,0;high=1662,0;low=17,0	diff=1551,0;high=1567,0;low=16,0
NC_017022.1	terminator_00443	1581644	1581667	-	TransTermHP	EFAU004_RS07850	NC_017022.1_transcript1391	TRUE	diff=12,0;high=21,0;low=9,0	diff=21,0;high=38,0;low=17,0	diff=16,0;high=28,0;low=12,0	diff=13,0;high=23,0;low=10,0	diff=15,0;high=27,0;low=12,0	diff=22,0;high=42,0;low=20,0
NC_017022.1	terminator_00444	1583677	1583694	-	TransTermHP	EFAU004_RS07865	NC_017022.1_transcript1392	FALSE	Not_detect	Not_detect	Not_detect	Not_detect	Not_detect	Not_detect
NC_017022.1	terminator_00445	1585333	1585397	+	gene_converged	transcript_01393	NC_017022.1_transcript1393	TRUE	Not_detect	Not_detect	Not_detect	diff=29,0;high=29,0;low=0,0	diff=28,0;high=28,0;low=0,0	diff=32,0;high=32,0;low=0,0
NC_017022.1	terminator_00446	1594882	1594900	+	gene_converged	transcript_01399	NC_017022.1_transcript1399	TRUE	Not_detect	diff=2,0;high=2,0;low=0,0	Not_detect	diff=31,0;high=31,0;low=0,0	diff=13,0;high=13,0;low=0,0	diff=16,0;high=16,0;low=0,0
NC_017022.1	terminator_00447	1598473	1598509	-	TransTermHP	EFAU004_RS07935	NC_017022.1_transcript1400	TRUE	diff=25,0;high=45,0;low=20,0	diff=18,0;high=34,0;low=16,0	diff=42,0;high=83,0;low=41,0	diff=25,0;high=49,0;low=24,0	diff=26,0;high=48,0;low=22,0	diff=39,0;high=74,0;low=35,0
NC_017022.1	terminator_00448	1605210	1605267	+	TransTermHP	EFAU004_RS07950	NC_017022.1_transcript1403	FALSE	Not_detect	Not_detect	Not_detect	Not_detect	Not_detect	Not_detect
NC_017022.1	terminator_00449	1609445	1609481	-	TransTermHP	EFAU004_RS07990	NC_017022.1_transcript1406	TRUE	Not_detect	Not_detect	Not_detect	diff=61,0;high=120,0;low=59,0	diff=59,0;high=112,0;low=53,0	diff=70,0;high=116,0;low=46,0
NC_017022.1	terminator_00450	1613165	1613201	-	TransTermHP	EFAU004_RS08010	NC_017022.1_transcript1413	TRUE	diff=46,0;high=85,0;low=39,0	diff=51,0;high=101,0;low=50,0	diff=64,0;high=111,0;low=47,0	diff=41,0;high=81,0;low=40,0	diff=34,0;high=66,0;low=32,0	diff=44,0;high=87,0;low=43,0
NC_017022.1	terminator_00451	1615276	1615298	+	gene_converged	transcript_01415	NC_017022.1_transcript1415	TRUE	diff=3,0;high=3,0;low=0,0	diff=3,0;high=3,0;low=0,0	diff=2,0;high=2,0;low=0,0	diff=29,0;high=51,0;low=22,0	diff=30,0;high=49,0;low=19,0	diff=16,0;high=25,0;low=9,0
NC_017022.1	terminator_00452	1636783	1636806	-	TransTermHP	EFAU004_RS08120	NC_017022.1_transcript1419	TRUE	diff=10,0;high=18,0;low=8,0	diff=7,0;high=12,0;low=5,0	diff=8,0;high=14,0;low=6,0	diff=7,0;high=13,0;low=6,0	diff=11,0;high=21,0;low=10,0	diff=9,0;high=12,0;low=3,0
NC_017022.1	terminator_00453	1651814	1651845	+	TransTermHP	EFAU004_RS08215	NC_017022.1_transcript1423	TRUE	diff=3,0;high=5,0;low=2,0	diff=3,0;high=4,0;low=1,0	diff=4,0;high=6,0;low=2,0	diff=12,0;high=18,0;low=6,0	diff=8,0;high=14,0;low=6,0	diff=18,0;high=26,0;low=8,0
NC_017022.1	terminator_00454	1665690	1665720	-	TransTermHP	EFAU004_RS08300	NC_017022.1_transcript1428	TRUE	diff=17,0;high=32,0;low=15,0	diff=26,0;high=48,0;low=22,0	diff=22,0;high=42,0;low=20,0	diff=20,0;high=35,0;low=15,0	diff=17,0;high=33,0;low=16,0	diff=17,0;high=32,0;low=15,0
NC_017022.1	terminator_00455	1681843	1681886	-	TransTermHP	engB	NC_017022.1_transcript1437	FALSE	Not_detect	Not_detect	Not_detect	Not_detect	Not_detect	Not_detect
NC_017022.1	terminator_00456	1682523	1682563	-	TransTermHP	EFAU004_RS08370	NC_017022.1_transcript1437	TRUE	diff=182,0;high=316,0;low=134,0	diff=171,0;high=300,0;low=129,0	diff=266,0;high=448,0;low=182,0	diff=81,0;high=149,0;low=68,0	diff=100,0;high=190,0;low=90,0	diff=95,0;high=177,0;low=82,0
NC_017022.1	terminator_00457	1683964	1684008	-	gene_converged;TransTermHP	transcript_01439,EFAU004_RS08375	NC_017022.1_transcript1439	TRUE	diff=17,0;high=33,0;low=16,0	diff=22,0;high=42,0;low=20,0	diff=28,0;high=54,0;low=26,0	diff=15,0;high=29,0;low=14,0	diff=14,0;high=26,0;low=12,0	diff=14,0;high=27,0;low=13,0
NC_017022.1	terminator_00458	1686520	1686575	-	TransTermHP	EFAU004_RS08385	NC_017022.1_transcript1441	TRUE	diff=12,0;high=20,0;low=8,0	diff=16,0;high=30,0;low=14,0	diff=12,0;high=22,0;low=10,0	diff=9,0;high=16,0;low=7,0	diff=8,0;high=15,0;low=7,0	diff=16,0;high=28,0;low=12,0
NC_017022.1	terminator_00459	1690804	1690855	+	gene_converged;TransTermHP	EFAU004_RS08400	NC_017022.1_transcript1442	FALSE	Not_detect	Not_detect	Not_detect	Not_detect	Not_detect	Not_detect
NC_017022.1	terminator_00460	1690804	1690855	-	gene_converged;TransTermHP	EFAU004_RS08405	NC_017022.1_transcript1443	TRUE	diff=15,0;high=15,0;low=0,0	diff=8,0;high=15,0;low=7,0	diff=6,0;high=11,0;low=5,0	diff=5,0;high=8,0;low=3,0	diff=3,0;high=4,0;low=1,0	diff=6,0;high=7,0;low=1,0
NC_017022.1	terminator_00461	1698924	1698951	+	gene_converged	EFAU004_RS08425	NC_017022.1_transcript1446	FALSE	Not_detect	Not_detect	Not_detect	Not_detect	Not_detect	Not_detect
NC_017022.1	terminator_00462	1708904	1708943	-	TransTermHP	EFAU004_RS08490	NC_017022.1_transcript1453	TRUE	diff=33,0;high=55,0;low=22,0	diff=25,0;high=49,0;low=24,0	diff=43,0;high=84,0;low=41,0	diff=51,0;high=101,0;low=50,0	diff=51,0;high=99,0;low=48,0	diff=58,0;high=108,0;low=50,0
NC_017022.1	terminator_00463	1711027	1711053	-	TransTermHP	EFAU004_RS08500	NC_017022.1_transcript1453	TRUE	diff=608,0;high=750,0;low=142,0	diff=834,0;high=989,0;low=155,0	diff=1276,0;high=1567,0;low=291,0	diff=136497,83333333;high=138315,0;low=1817,16666667	diff=119505,0;high=121539,0;low=2034,0	diff=200962,0;high=203535,0;low=2573,0
NC_017022.1	terminator_00464	1718549	1718576	+	TransTermHP	EFAU004_RS08515	NC_017022.1_transcript1456	TRUE	diff=2,0;high=2,0;low=0,0	diff=2,0;high=3,0;low=1,0	diff=6,0;high=10,0;low=4,0	diff=3,0;high=4,0;low=1,0	diff=3,0;high=4,0;low=1,0	diff=3,0;high=5,0;low=2,0
NC_017022.1	terminator_00465	1720742	1720773	-	TransTermHP	EFAU004_RS08530	NC_017022.1_transcript1459	TRUE	diff=6,0;high=10,0;low=4,0	diff=8,0;high=12,0;low=4,0	diff=7,0;high=12,0;low=5,0	diff=11,0;high=20,0;low=9,0	diff=5,0;high=8,0;low=3,0	diff=6,0;high=10,0;low=4,0
NC_017022.1	terminator_00466	1727124	1727161	+	TransTermHP	EFAU004_RS08555	NC_017022.1_transcript1463	TRUE	diff=5,0;high=8,0;low=3,0	diff=5,0;high=8,0;low=3,0	diff=6,0;high=10,0;low=4,0	diff=217,0;high=224,0;low=7,0	diff=135,0;high=137,0;low=2,0	diff=244,0;high=250,0;low=6,0
NC_017022.1	terminator_00467	1728014	1728046	+	gene_converged;TransTermHP	EFAU004_RS08560	NC_017022.1_transcript1464	FALSE	Not_detect	Not_detect	Not_detect	Not_detect	Not_detect	Not_detect
NC_017022.1	terminator_00468	1730502	1730517	+	TransTermHP	EFAU004_RS08575	NC_017022.1_transcript1467	TRUE	diff=6,0;high=8,0;low=2,0	diff=6,0;high=10,0;low=4,0	Not_detect	diff=52,0;high=59,0;low=7,0	diff=40,0;high=52,0;low=12,0	diff=42,0;high=56,0;low=14,0
NC_017022.1	terminator_00469	1731168	1731190	-	gene_converged	transcript_01469,EFAU004_RS08585	NC_017022.1_transcript1469	TRUE	diff=8,0;high=14,0;low=6,0	diff=8,0;high=14,0;low=6,0	diff=7,0;high=11,0;low=4,0	diff=9,0;high=15,0;low=6,0	diff=8,0;high=15,0;low=7,0	diff=4,0;high=7,0;low=3,0
NC_017022.1	terminator_00470	1735325	1735357	+	gene_converged	transcript_01472	NC_017022.1_transcript1472	TRUE	diff=328,0;high=377,0;low=49,0	diff=328,0;high=385,0;low=57,0	diff=587,0;high=671,0;low=84,0	diff=4233,0;high=4649,0;low=416,0	diff=3772,0;high=4114,0;low=342,0	diff=6279,0;high=6872,0;low=593,0
NC_017022.1	terminator_00471	1738519	1738581	-	gene_converged;TransTermHP	EFAU004_RS08610	NC_017022.1_transcript1474	TRUE	diff=5,0;high=8,0;low=3,0	diff=12,0;high=21,0;low=9,0	diff=10,0;high=18,0;low=8,0	diff=15,0;high=28,0;low=13,0	diff=8,0;high=15,0;low=7,0	diff=5,0;high=9,0;low=4,0
NC_017022.1	terminator_00472	1748228	1748253	-	gene_converged	transcript_01477,EFAU004_RS08645	NC_017022.1_transcript1477	TRUE	diff=3,0;high=5,0;low=2,0	diff=5,0;high=9,0;low=4,0	diff=5,0;high=8,0;low=3,0	diff=8,0;high=13,0;low=5,0	diff=7,0;high=12,0;low=5,0	diff=4,0;high=7,0;low=3,0
NC_017022.1	terminator_00473	1751289	1751317	-	gene_converged	EFAU004_RS08655	NC_017022.1_transcript1477	TRUE	Not_detect	Not_detect	diff=33,0;high=63,0;low=30,0	diff=792,0;high=839,0;low=47,0	diff=623,0;high=652,0;low=29,0	diff=913,0;high=956,0;low=43,0
NC_017022.1	terminator_00474	1754660	1754684	-	TransTermHP	EFAU004_RS08675	NC_017022.1_transcript1480	TRUE	diff=22,0;high=43,0;low=21,0	diff=29,0;high=52,0;low=23,0	diff=35,0;high=64,0;low=29,0	diff=61,0;high=119,0;low=58,0	diff=52,0;high=101,0;low=49,0	diff=56,0;high=107,0;low=51,0
NC_017022.1	terminator_00475	1755622	1755668	-	TransTermHP	EFAU004_RS08680	NC_017022.1_transcript1480	TRUE	diff=234,0;high=256,0;low=22,0	diff=225,0;high=248,0;low=23,0	diff=226,5;high=246,5;low=20,0	diff=77,0;high=82,0;low=5,0	diff=68,0;high=75,0;low=7,0	diff=72,0;high=76,0;low=4,0
NC_017022.1	terminator_00476	1757310	1757335	+	TransTermHP	EFAU004_RS08685	NC_017022.1_transcript1481	TRUE	diff=5,0;high=7,0;low=2,0	diff=3,0;high=4,0;low=1,0	diff=10,0;high=14,0;low=4,0	diff=7,0;high=10,0;low=3,0	diff=5,0;high=9,0;low=4,0	diff=3,0;high=4,0;low=1,0
NC_017022.1	terminator_00477	1759579	1759628	-	gene_converged;TransTermHP	EFAU004_RS08705	NC_017022.1_transcript1483	TRUE	diff=3,0;high=4,0;low=1,0	diff=9,0;high=16,0;low=7,0	diff=11,0;high=14,0;low=3,0	diff=6,0;high=11,0;low=5,0	diff=4,0;high=7,0;low=3,0	diff=3,0;high=5,0;low=2,0
NC_017022.1	terminator_00478	1761472	1761510	-	TransTermHP	EFAU004_RS08710	NC_017022.1_transcript1483	TRUE	diff=27,0;high=44,0;low=17,0	diff=24,0;high=46,0;low=22,0	diff=39,0;high=68,0;low=29,0	diff=32,0;high=58,0;low=26,0	diff=34,0;high=60,0;low=26,0	diff=34,0;high=66,0;low=32,0
NC_017022.1	terminator_00479	1762841	1762879	-	TransTermHP	EFAU004_RS08715	NC_017022.1_transcript1485	TRUE	Not_detect	diff=30,0;high=58,0;low=28,0	Not_detect	diff=33,0;high=63,0;low=30,0	diff=30,0;high=56,0;low=26,0	diff=30,0;high=59,0;low=29,0
NC_017022.1	terminator_00480	1763976	1764011	-	TransTermHP	EFAU004_RS08720	NC_017022.1_transcript1485	TRUE	diff=108,0;high=205,0;low=97,0	diff=78,0;high=150,0;low=72,0	diff=86,0;high=170,0;low=84,0	diff=65,0;high=115,0;low=50,0	Not_detect	diff=44,0;high=85,0;low=41,0
NC_017022.1	terminator_00481	1766417	1766466	+	gene_converged;TransTermHP	EFAU004_RS08725	NC_017022.1_transcript1487	FALSE	Not_detect	Not_detect	Not_detect	Not_detect	Not_detect	Not_detect
NC_017022.1	terminator_00482	1773855	1773907	+	gene_converged;TransTermHP	transcript_01494,EFAU004_RS08765	NC_017022.1_transcript1494	TRUE	diff=22,0;high=40,0;low=18,0	diff=19,0;high=36,0;low=17,0	diff=15,0;high=24,0;low=9,0	diff=16,0;high=28,0;low=12,0	diff=16,0;high=30,0;low=14,0	diff=11,0;high=20,0;low=9,0
NC_017022.1	terminator_00483	1776149	1776179	-	TransTermHP	EFAU004_RS08780	NA	FALSE	Not_detect	Not_detect	Not_detect	Not_detect	Not_detect	Not_detect
NC_017022.1	terminator_00484	1783797	1783829	-	TransTermHP	EFAU004_RS08830	NC_017022.1_transcript1503	TRUE	Not_detect	diff=13,0;high=25,0;low=12,0	Not_detect	diff=24,0;high=28,0;low=4,0	diff=17,0;high=21,0;low=4,0	diff=15,0;high=18,0;low=3,0
NC_017022.1	terminator_00485	1784669	1784693	+	TransTermHP	EFAU004_RS08835	NC_017022.1_transcript1504	FALSE	Not_detect	Not_detect	Not_detect	Not_detect	Not_detect	Not_detect
NC_017022.1	terminator_00486	1786174	1786225	+	gene_converged;TransTermHP	EFAU004_RS08840	NC_017022.1_transcript1506	TRUE	diff=4,0;high=4,0;low=0,0	diff=4,0;high=6,0;low=2,0	diff=3,0;high=4,0;low=1,0	diff=48,0;high=75,0;low=27,0	diff=23,666666666700003;high=41,6666666667;low=18,0	diff=46,0;high=86,0;low=40,0
NC_017022.1	terminator_00487	1786187	1786217	-	TransTermHP	EFAU004_RS08845	NC_017022.1_transcript1507	TRUE	diff=15,0;high=26,0;low=11,0	diff=20,0;high=38,0;low=18,0	diff=13,0;high=23,0;low=10,0	diff=14,0;high=24,0;low=10,0	diff=20,0;high=38,0;low=18,0	diff=16,0;high=30,0;low=14,0
NC_017022.1	terminator_00488	1790023	1790076	-	gene_converged;TransTermHP	EFAU004_RS08855	NA	FALSE	Not_detect	Not_detect	Not_detect	Not_detect	Not_detect	Not_detect
NC_017022.1	terminator_00489	1791810	1791836	+	gene_converged	transcript_01512	NC_017022.1_transcript1512	TRUE	diff=9,93333333336;high=19,0527777778;low=9,11944444444	diff=13,925;high=26,7083333333;low=12,7833333333	diff=18,052777777800003;high=35,7916666667;low=17,7388888889	diff=1271,892676764;high=2111,17323232;low=839,280555556	diff=0,333333333334;high=0,555555555556;low=0,222222222222	diff=1258,7060606010002;high=2126,24494949;low=867,538888889
NC_017022.1	terminator_00490	1792978	1793005	-	TransTermHP	EFAU004_RS08875	NC_017022.1_transcript1515	TRUE	diff=16,0;high=28,0;low=12,0	diff=19,0;high=37,0;low=18,0	diff=20,0;high=38,0;low=18,0	diff=21,0;high=40,0;low=19,0	diff=17,0;high=32,0;low=15,0	diff=16,0;high=26,0;low=10,0
NC_017022.1	terminator_00491	1795535	1795592	-	gene_converged;TransTermHP	EFAU004_RS08890	NC_017022.1_transcript1518	FALSE	Not_detect	Not_detect	Not_detect	Not_detect	Not_detect	Not_detect
NC_017022.1	terminator_00492	1800325	1800374	-	gene_converged;TransTermHP	EFAU004_RS08915	NC_017022.1_transcript1523	TRUE	diff=25,0;high=44,0;low=19,0	diff=25,0;high=49,0;low=24,0	diff=38,0;high=67,0;low=29,0	diff=34,0;high=60,0;low=26,0	diff=30,0;high=59,0;low=29,0	diff=36,0;high=69,0;low=33,0
NC_017022.1	terminator_00493	1802622	1802647	+	gene_converged	transcript_01529	NC_017022.1_transcript1529	TRUE	diff=6,5;high=12,5;low=6,0	diff=5,5;high=10,5;low=5,0	diff=7,5;high=13,0;low=5,5	diff=276,0;high=509,0;low=233,0	diff=187,0;high=317,0;low=130,0	diff=259,5;high=500,0;low=240,5
NC_017022.1	terminator_00494	1805874	1805917	-	gene_converged;TransTermHP	transcript_01534,pgi	NC_017022.1_transcript1534	TRUE	diff=41,0;high=80,0;low=39,0	diff=53,0;high=102,0;low=49,0	diff=44,0;high=87,0;low=43,0	diff=38,0;high=75,0;low=37,0	diff=40,0;high=79,0;low=39,0	diff=27,0;high=53,0;low=26,0
NC_017022.1	terminator_00495	1810206	1810264	-	gene_converged;TransTermHP	EFAU004_RS08960	NC_017022.1_transcript1537	FALSE	Not_detect	Not_detect	Not_detect	Not_detect	Not_detect	Not_detect
NC_017022.1	terminator_00496	1810214	1810257	+	TransTermHP	EFAU004_RS08955	NC_017022.1_transcript1536	FALSE	Not_detect	Not_detect	Not_detect	Not_detect	Not_detect	Not_detect
NC_017022.1	terminator_00497	1815098	1815132	+	TransTermHP	EFAU004_RS08975	NC_017022.1_transcript1538	TRUE	diff=4,0;high=7,0;low=3,0	diff=6,0;high=11,0;low=5,0	diff=7,0;high=13,0;low=6,0	diff=1,0;high=1,0;low=0,0	diff=2,0;high=3,0;low=1,0	diff=3,0;high=5,0;low=2,0
NC_017022.1	terminator_00498	1820001	1820016	+	TransTermHP	EFAU004_RS09005	NC_017022.1_transcript1542	TRUE	diff=7,0;high=12,0;low=5,0	diff=9,0;high=16,0;low=7,0	diff=9,0;high=17,0;low=8,0	diff=10,0;high=18,0;low=8,0	diff=6,0;high=9,0;low=3,0	diff=7,0;high=12,0;low=5,0
NC_017022.1	terminator_00499	1820571	1820618	+	gene_converged	ssrA	NC_017022.1_transcript1543	TRUE	diff=3120,0;high=3377,0;low=257,0	diff=2541,0;high=5008,0;low=2467,0	diff=3281,0;high=3602,0;low=321,0	diff=3218,75;high=3783,75;low=565,0	diff=2834,0;high=3330,0;low=496,0	diff=3428,0;high=4052,0;low=624,0
NC_017022.1	terminator_00500	1821317	1821343	+	gene_converged	transcript_01547,EFAU004_RS09010	NC_017022.1_transcript1547	TRUE	diff=131,166666667;high=152,666666667;low=21,5	diff=211,583333333;high=236,833333333;low=25,25	diff=312,75;high=341,75;low=29,0	diff=37143,749999966996;high=37274,0833333;low=130,333333333	diff=31433,5833333;high=31567,8333333;low=134,25	diff=48803,499999966996;high=48996,8333333;low=193,333333333
NC_017022.1	terminator_00501	1821484	1821512	-	gene_converged;TransTermHP	EFAU004_RS09015	NC_017022.1_transcript1549	TRUE	diff=5,666666666659999;high=9,33333333333;low=3,66666666667	diff=3,33333333334;high=6,66666666667;low=3,33333333333	diff=6,66666666667;high=13,0;low=6,33333333333	diff=148,99999999999997;high=291,333333333;low=142,333333333	diff=145,6666666667;high=233,0;low=87,3333333333	diff=139,5;high=272,0;low=132,5
NC_017022.1	terminator_00502	1824706	1824752	-	TransTermHP	EFAU004_RS09030	NC_017022.1_transcript1558	TRUE	diff=7,0;high=9,0;low=2,0	diff=4,0;high=6,0;low=2,0	diff=6,0;high=7,0;low=1,0	diff=10,0;high=13,0;low=3,0	diff=5,0;high=5,0;low=0,0	diff=4,8;high=6,0;low=1,2
NC_017022.1	terminator_00503	1825079	1825093	-	TransTermHP	EFAU004_RS09035	NA	FALSE	Not_detect	Not_detect	Not_detect	Not_detect	Not_detect	Not_detect
NC_017022.1	terminator_00504	1825787	1825823	-	TransTermHP	EFAU004_RS09040	NC_017022.1_transcript1560	TRUE	diff=10,0;high=16,0;low=6,0	diff=9,0;high=14,0;low=5,0	diff=4,0;high=7,0;low=3,0	diff=8,0;high=14,0;low=6,0	diff=4,0;high=7,0;low=3,0	diff=5,0;high=7,0;low=2,0
NC_017022.1	terminator_00505	1832926	1832972	+	TransTermHP	EFAU004_RS09075	NC_017022.1_transcript1562	TRUE	diff=9,0;high=16,0;low=7,0	diff=10,0;high=19,0;low=9,0	diff=8,8;high=16,0;low=7,2	diff=8,0;high=15,0;low=7,0	diff=10,0;high=16,0;low=6,0	diff=8,3333333333;high=15,3333333333;low=7,0
NC_017022.1	terminator_00506	1836852	1836875	+	gene_converged	transcript_01567	NC_017022.1_transcript1567	TRUE	diff=1,0;high=1,0;low=0,0	Not_detect	Not_detect	diff=34,0;high=49,0;low=15,0	diff=20,0;high=25,0;low=5,0	diff=28,0;high=36,0;low=8,0
NC_017022.1	terminator_00507	1854804	1854831	+	gene_converged	transcript_01579	NC_017022.1_transcript1579	TRUE	Not_detect	Not_detect	diff=1,0;high=1,0;low=0,0	diff=46,0;high=52,0;low=6,0	diff=34,0;high=45,0;low=11,0	diff=60,0;high=66,0;low=6,0
NC_017022.1	terminator_00508	1884252	1884269	-	TransTermHP	EFAU004_RS15470	NA	FALSE	Not_detect	Not_detect	Not_detect	Not_detect	Not_detect	Not_detect
NC_017022.1	terminator_00509	1893495	1893527	+	gene_converged	transcript_01596	NC_017022.1_transcript1596	TRUE	Not_detect	Not_detect	Not_detect	diff=23,0;high=23,0;low=0,0	diff=17,0;high=18,0;low=1,0	diff=19,0;high=19,0;low=0,0
NC_017022.1	terminator_00510	1894583	1894601	-	TransTermHP	EFAU004_RS09370	NC_017022.1_transcript1597	TRUE	diff=54,0;high=95,0;low=41,0	diff=38,0;high=72,0;low=34,0	diff=63,0;high=125,0;low=62,0	diff=69,0;high=108,0;low=39,0	diff=70,0;high=111,0;low=41,0	diff=65,0;high=127,0;low=62,0
NC_017022.1	terminator_00511	1897448	1897473	-	TransTermHP	EFAU004_RS09390	NC_017022.1_transcript1599	TRUE	diff=10,0;high=19,0;low=9,0	diff=13,0;high=22,0;low=9,0	diff=12,0;high=22,0;low=10,0	diff=32,666666666699996;high=62,0;low=29,3333333333	diff=14,0;high=27,0;low=13,0	diff=44,0;high=75,0;low=31,0
NC_017022.1	terminator_00512	1898843	1898892	+	gene_converged;TransTermHP	transcript_01600,EFAU004_RS09400	NC_017022.1_transcript1600	TRUE	diff=6,0;high=11,0;low=5,0	diff=8,0;high=14,0;low=6,0	diff=11,0;high=19,0;low=8,0	diff=17,0;high=21,0;low=4,0	diff=26,0;high=32,0;low=6,0	diff=38,0;high=46,0;low=8,0
NC_017022.1	terminator_00513	1900072	1900107	-	TransTermHP	EFAU004_RS09415	NC_017022.1_transcript1602	TRUE	diff=5,199999999999999;high=9,2;low=4,0	diff=2,0;high=2,0;low=0,0	diff=12,0;high=16,0;low=4,0	diff=1,2000000000000002;high=2,2;low=1,0	diff=4,0;high=4,0;low=0,0	diff=2,2;high=3,2;low=1,0
NC_017022.1	terminator_00514	1912997	1913054	+	gene_converged;TransTermHP	EFAU004_RS09465	NC_017022.1_transcript1610	FALSE	Not_detect	Not_detect	Not_detect	Not_detect	Not_detect	Not_detect
NC_017022.1	terminator_00515	1913058	1913079	-	gene_converged	EFAU004_RS09470	NC_017022.1_transcript1611	TRUE	diff=4,0;high=7,0;low=3,0	diff=4,0;high=7,0;low=3,0	diff=11,0;high=20,0;low=9,0	diff=7,0;high=12,0;low=5,0	Not_detect	diff=2,0;high=3,0;low=1,0
NC_017022.1	terminator_00516	1915286	1915340	+	gene_converged	transcript_01617,EFAU004_RS15480	NC_017022.1_transcript1617	TRUE	diff=163,1666666667;high=180,0;low=16,8333333333	diff=197,2500000003;high=220,166666667;low=22,9166666667	diff=299,75;high=322,75;low=23,0	diff=14296,5833333333;high=14340,25;low=43,6666666667	diff=11574,9999999667;high=11632,5833333;low=57,5833333333	diff=15123,6666666667;high=15195,0;low=71,3333333333
NC_017022.1	terminator_00517	1915596	1915619	-	gene_converged	transcript_01619	NC_017022.1_transcript1619	TRUE	diff=71,75;high=143,375;low=71,625	diff=87,95833333300001;high=175,458333333;low=87,5	diff=130,0;high=257,25;low=127,25	diff=6279,361111110001;high=12233,3015873;low=5953,94047619	diff=4823,36111112;high=9450,86507937;low=4627,50396825	diff=6463,72222221;high=12822,7579365;low=6359,03571429
NC_017022.1	terminator_00518	1916963	1917015	-	gene_converged;TransTermHP	EFAU004_RS09485	NC_017022.1_transcript1621	TRUE	diff=12,0;high=23,0;low=11,0	diff=14,0;high=26,0;low=12,0	diff=12,0;high=23,0;low=11,0	diff=123,0;high=129,5;low=6,5	diff=119,0;high=124,0;low=5,0	diff=141,5;high=153,0;low=11,5
NC_017022.1	terminator_00519	1917174	1917196	+	gene_converged	transcript_01622,EFAU004_RS09480	NC_017022.1_transcript1622	TRUE	diff=2,0;high=2,0;low=0,0	Not_detect	Not_detect	diff=33,0;high=33,0;low=0,0	diff=32,0;high=32,0;low=0,0	diff=35,0;high=35,0;low=0,0
NC_017022.1	terminator_00520	1918255	1918282	+	gene_converged	transcript_01624	NC_017022.1_transcript1624	TRUE	diff=5,75;high=11,4;low=5,65	diff=11,9;high=13,15;low=1,25	diff=10,55;high=12,3;low=1,75	diff=501,04999999999995;high=505,15;low=4,1	diff=365,34999999999997;high=369,95;low=4,6	diff=608,85;high=614,2;low=5,35
NC_017022.1	terminator_00521	1920418	1920476	+	TransTermHP	EFAU004_RS09495	NC_017022.1_transcript1630	TRUE	diff=3,0;high=4,0;low=1,0	diff=3,0;high=5,0;low=2,0	diff=4,0;high=7,0;low=3,0	diff=27,0;high=46,0;low=19,0	diff=19,0;high=31,0;low=12,0	diff=17,0;high=33,0;low=16,0
NC_017022.1	terminator_00522	1941891	1941939	+	gene_converged;TransTermHP	transcript_01653	NC_017022.1_transcript1653	FALSE	Not_detect	Not_detect	Not_detect	Not_detect	Not_detect	Not_detect
NC_017022.1	terminator_00523	1949115	1949134	-	TransTermHP	asnC	NC_017022.1_transcript1657	TRUE	diff=57,5;high=109,5;low=52,0	diff=53,0;high=105,0;low=52,0	diff=88,0;high=167,0;low=79,0	diff=24,0;high=47,0;low=23,0	diff=31,0;high=58,0;low=27,0	diff=37,0;high=72,0;low=35,0
NC_017022.1	terminator_00524	1955315	1955340	-	TransTermHP	EFAU004_RS09675	NC_017022.1_transcript1658	TRUE	diff=18,0;high=26,0;low=8,0	diff=8,0;high=14,0;low=6,0	diff=15,0;high=29,0;low=14,0	diff=16,0;high=31,0;low=15,0	diff=12,0;high=22,0;low=10,0	diff=16,0;high=31,0;low=15,0
NC_017022.1	terminator_00525	1956445	1956469	-	TransTermHP	EFAU004_RS09685	NC_017022.1_transcript1661	TRUE	diff=15,0;high=22,0;low=7,0	diff=10,0;high=18,0;low=8,0	diff=6,0;high=11,0;low=5,0	diff=9,0;high=17,0;low=8,0	diff=7,0;high=13,0;low=6,0	diff=5,0;high=8,0;low=3,0
NC_017022.1	terminator_00526	1959754	1959774	+	TransTermHP	EFAU004_RS09695	NC_017022.1_transcript1663	TRUE	diff=21,0;high=23,0;low=2,0	diff=31,0;high=35,0;low=4,0	diff=31,0;high=37,0;low=6,0	diff=21,0;high=22,0;low=1,0	diff=16,0;high=18,0;low=2,0	diff=9,0;high=16,0;low=7,0
NC_017022.1	terminator_00527	1961060	1961090	+	TransTermHP	EFAU004_RS09700	NC_017022.1_transcript1664	FALSE	Not_detect	Not_detect	Not_detect	Not_detect	Not_detect	Not_detect
NC_017022.1	terminator_00528	1962376	1962417	-	TransTermHP	EFAU004_RS09710	NC_017022.1_transcript1665	TRUE	diff=28,0;high=35,0;low=7,0	diff=47,0;high=53,0;low=6,0	diff=56,0;high=69,0;low=13,0	diff=1177,0;high=1197,0;low=20,0	diff=1037,0;high=1048,0;low=11,0	diff=1172,0;high=1193,0;low=21,0
NC_017022.1	terminator_00529	1963190	1963231	-	TransTermHP	EFAU004_RS15520	NC_017022.1_transcript1666	TRUE	diff=81,0;high=120,0;low=39,0	diff=68,0;high=121,0;low=53,0	diff=121,0;high=198,0;low=77,0	diff=235,0;high=294,0;low=59,0	diff=157,0;high=193,0;low=36,0	diff=222,0;high=273,0;low=51,0
NC_017022.1	terminator_00530	1966860	1966901	+	gene_converged;TransTermHP	EFAU004_RS09730	NC_017022.1_transcript1670	TRUE	diff=7,0;high=10,0;low=3,0	diff=9,0;high=17,0;low=8,0	diff=12,0;high=23,0;low=11,0	diff=3,0;high=5,0;low=2,0	diff=4,0;high=5,0;low=1,0	Not_detect
NC_017022.1	terminator_00531	1979518	1979539	+	gene_converged	transcript_01674	NC_017022.1_transcript1674	TRUE	diff=14,6452380952;high=28,3987179487;low=13,7534798535	diff=19,2509157509;high=35,6956043956;low=16,4446886447	diff=23,586630036600003;high=46,6402930403;low=23,0536630037	diff=983,9642857179999;high=1746,35586081;low=762,391575092	diff=724,408333329;high=1325,00888278;low=600,600549451	diff=915,954761907;high=1678,06794872;low=762,113186813
NC_017022.1	terminator_00532	1979628	1979648	-	gene_converged;TransTermHP	transcript_01675,EFAU004_RS15525	NC_017022.1_transcript1675	TRUE	diff=2,0;high=2,0;low=0,0	Not_detect	Not_detect	diff=10,0;high=18,0;low=8,0	diff=9,0;high=13,0;low=4,0	diff=7,125;high=13,125;low=6,0
NC_017022.1	terminator_00533	1986117	1986137	-	TransTermHP	EFAU004_RS09830	NC_017022.1_transcript1683	TRUE	diff=30,0;high=58,0;low=28,0	diff=20,0;high=39,0;low=19,0	diff=32,0;high=60,0;low=28,0	diff=21,0;high=36,0;low=15,0	diff=16,0;high=30,0;low=14,0	diff=16,0;high=29,0;low=13,0
NC_017022.1	terminator_00534	1991888	1991926	-	gene_converged	EFAU004_RS09855	NC_017022.1_transcript1688	TRUE	diff=10,0;high=19,0;low=9,0	diff=8,0;high=11,0;low=3,0	diff=28,0;high=28,0;low=0,0	diff=6,0;high=6,0;low=0,0	diff=15,0;high=15,0;low=0,0	diff=9,0;high=9,0;low=0,0
NC_017022.1	terminator_00535	1993378	1993428	-	gene_converged	transcript_01691	NC_017022.1_transcript1691	TRUE	diff=6,0;high=11,0;low=5,0	Not_detect	Not_detect	diff=27,0;high=51,0;low=24,0	diff=21,0;high=40,0;low=19,0	diff=32,0;high=61,0;low=29,0
NC_017022.1	terminator_00536	1994845	1994876	-	TransTermHP	EFAU004_RS09870	NC_017022.1_transcript1692	TRUE	diff=16,0;high=31,0;low=15,0	diff=16,0;high=26,0;low=10,0	diff=22,0;high=37,0;low=15,0	diff=15,0;high=29,0;low=14,0	diff=14,0;high=27,0;low=13,0	diff=6,0;high=11,0;low=5,0
NC_017022.1	terminator_00537	2000795	2000815	-	gene_converged	EFAU004_RS09895	NC_017022.1_transcript1692	TRUE	Not_detect	diff=3,0;high=4,0;low=1,0	Not_detect	diff=13,0;high=16,0;low=3,0	diff=6,0;high=7,0;low=1,0	diff=9,0;high=13,0;low=4,0
NC_017022.1	terminator_00538	2004904	2004924	+	gene_converged	transcript_01699	NC_017022.1_transcript1699	TRUE	Not_detect	Not_detect	Not_detect	diff=54,0;high=54,0;low=0,0	diff=66,0;high=66,0;low=0,0	diff=84,0;high=84,0;low=0,0
NC_017022.1	terminator_00539	2008417	2008458	+	gene_converged	EFAU004_RS09935	NC_017022.1_transcript1705	FALSE	Not_detect	Not_detect	Not_detect	Not_detect	Not_detect	Not_detect
NC_017022.1	terminator_00540	2014300	2014349	-	gene_converged;TransTermHP	EFAU004_RS09965	NC_017022.1_transcript1710	TRUE	diff=19,0;high=35,0;low=16,0	diff=15,0;high=28,0;low=13,0	diff=23,0;high=43,0;low=20,0	diff=19,0;high=37,0;low=18,0	diff=21,0;high=35,0;low=14,0	diff=23,0;high=40,0;low=17,0
NC_017022.1	terminator_00541	2015458	2015486	-	TransTermHP	EFAU004_RS09970	NC_017022.1_transcript1712	TRUE	diff=14,0;high=26,0;low=12,0	diff=7,0;high=13,0;low=6,0	diff=9,0;high=15,0;low=6,0	diff=6,0;high=11,0;low=5,0	diff=7,0;high=13,0;low=6,0	diff=9,0;high=16,0;low=7,0
NC_017022.1	terminator_00542	2022745	2022777	-	gene_converged;TransTermHP	EFAU004_RS10000	NC_017022.1_transcript1716	TRUE	diff=50,0;high=84,0;low=34,0	diff=60,0;high=101,0;low=41,0	diff=89,0;high=154,0;low=65,0	diff=47,0;high=93,0;low=46,0	diff=41,0;high=79,0;low=38,0	diff=59,0;high=109,0;low=50,0
NC_017022.1	terminator_00543	2025007	2025051	-	TransTermHP	EFAU004_RS10020	NC_017022.1_transcript1720	FALSE	Not_detect	Not_detect	Not_detect	Not_detect	Not_detect	Not_detect
NC_017022.1	terminator_00544	2027336	2027369	-	TransTermHP	EFAU004_RS10030	NC_017022.1_transcript1722	TRUE	diff=11,0;high=19,0;low=8,0	diff=15,0;high=29,0;low=14,0	diff=13,0;high=20,0;low=7,0	diff=11,0;high=21,0;low=10,0	diff=10,0;high=17,0;low=7,0	diff=7,0;high=13,0;low=6,0
NC_017022.1	terminator_00545	2035342	2035381	-	TransTermHP	EFAU004_RS10060	NC_017022.1_transcript1728	TRUE	diff=11,0;high=15,0;low=4,0	diff=17,0;high=21,0;low=4,0	diff=12,0;high=17,0;low=5,0	diff=23,0;high=38,0;low=15,0	diff=22,0;high=33,0;low=11,0	diff=29,0;high=44,0;low=15,0
NC_017022.1	terminator_00546	2039249	2039269	-	TransTermHP	EFAU004_RS10070	NC_017022.1_transcript1729	TRUE	diff=17,0;high=29,0;low=12,0	diff=27,0;high=53,0;low=26,0	diff=33,0;high=61,0;low=28,0	diff=31,0;high=58,0;low=27,0	diff=25,0;high=49,0;low=24,0	diff=31,0;high=60,0;low=29,0
NC_017022.1	terminator_00547	2041340	2041365	+	gene_converged	EFAU004_RS10075	NC_017022.1_transcript1730	TRUE	diff=15,0;high=29,0;low=14,0	diff=7,0;high=13,0;low=6,0	diff=10,0;high=18,0;low=8,0	diff=3,0;high=5,0;low=2,0	diff=4,0;high=7,0;low=3,0	diff=5,0;high=8,0;low=3,0
NC_017022.1	terminator_00548	2044330	2044351	-	TransTermHP	EFAU004_RS15540	NC_017022.1_transcript1733	TRUE	Not_detect	diff=15,0;high=22,0;low=7,0	diff=9,0;high=17,0;low=8,0	diff=327,0;high=339,0;low=12,0	diff=196,0;high=206,0;low=10,0	diff=178,0;high=185,0;low=7,0
NC_017022.1	terminator_00549	2046946	2047000	+	gene_converged;TransTermHP	EFAU004_RS10090	NC_017022.1_transcript1734	TRUE	diff=3,0;high=3,0;low=0,0	diff=5,0;high=6,0;low=1,0	diff=4,0;high=7,0;low=3,0	diff=3,0;high=4,0;low=1,0	diff=9,0;high=13,0;low=4,0	diff=2,0;high=2,0;low=0,0
NC_017022.1	terminator_00550	2047089	2047131	-	gene_converged;TransTermHP	EFAU004_RS10095	NC_017022.1_transcript1735	TRUE	diff=36,0;high=49,0;low=13,0	diff=31,0;high=61,0;low=30,0	diff=46,0;high=90,0;low=44,0	diff=43,0;high=84,0;low=41,0	diff=34,0;high=66,0;low=32,0	diff=37,0;high=73,0;low=36,0
NC_017022.1	terminator_00551	2049589	2049630	-	gene_converged;TransTermHP	EFAU004_RS10105	NC_017022.1_transcript1739	TRUE	diff=40,0;high=79,0;low=39,0	diff=31,0;high=61,0;low=30,0	diff=38,0;high=73,0;low=35,0	diff=21,0;high=37,0;low=16,0	diff=18,0;high=30,0;low=12,0	diff=13,0;high=22,0;low=9,0
NC_017022.1	terminator_00552	2049598	2049621	+	TransTermHP	EFAU004_RS10100	NC_017022.1_transcript1738	TRUE	diff=5,0;high=6,0;low=1,0	diff=3,0;high=5,0;low=2,0	diff=9,0;high=12,0;low=3,0	diff=10,0;high=16,0;low=6,0	diff=9,0;high=14,0;low=5,0	diff=7,0;high=9,0;low=2,0
NC_017022.1	terminator_00553	2050761	2050802	-	TransTermHP	EFAU004_RS10115	NC_017022.1_transcript1739	TRUE	diff=100,428571429;high=107,428571429;low=7,0	diff=54,5;high=61,5;low=7,0	diff=105,285714286;high=116,285714286;low=11,0	diff=42,0;high=44,0;low=2,0	diff=41,0;high=48,0;low=7,0	diff=19,2857142857;high=19,2857142857;low=0,0
NC_017022.1	terminator_00554	2054759	2054780	-	TransTermHP	EFAU004_RS10135	NC_017022.1_transcript1740	TRUE	Not_detect	diff=4,0;high=6,0;low=2,0	diff=6,0;high=11,0;low=5,0	diff=15,0;high=23,0;low=8,0	diff=6,0;high=10,0;low=4,0	diff=12,0;high=15,0;low=3,0
NC_017022.1	terminator_00555	2055676	2055713	-	TransTermHP	EFAU004_RS10145	NC_017022.1_transcript1740	TRUE	diff=38,0;high=74,0;low=36,0	diff=42,0;high=82,0;low=40,0	diff=64,0;high=126,0;low=62,0	diff=19,0;high=37,0;low=18,0	Not_detect	diff=38,0;high=66,0;low=28,0
NC_017022.1	terminator_00556	2059242	2059282	-	TransTermHP	EFAU004_RS10160	NC_017022.1_transcript1741	TRUE	diff=8,0;high=14,0;low=6,0	diff=7,0;high=12,0;low=5,0	diff=8,0;high=14,0;low=6,0	diff=5,05507246377;high=7,05507246377;low=2,0	diff=6,0;high=10,0;low=4,0	diff=3,0909090909100003;high=6,09090909091;low=3,0
NC_017022.1	terminator_00557	2064806	2064843	-	TransTermHP	EFAU004_RS10190	NC_017022.1_transcript1744	TRUE	diff=10,0;high=14,0;low=4,0	diff=12,0;high=20,0;low=8,0	diff=7,0;high=13,0;low=6,0	diff=5,0;high=9,0;low=4,0	diff=6,0;high=10,0;low=4,0	diff=3,0;high=5,0;low=2,0
NC_017022.1	terminator_00558	2066403	2066431	-	TransTermHP	EFAU004_RS10195	NC_017022.1_transcript1745	TRUE	diff=5,0;high=8,0;low=3,0	diff=4,0;high=7,0;low=3,0	diff=6,0;high=11,0;low=5,0	diff=7,0;high=12,0;low=5,0	diff=12,0;high=22,0;low=10,0	diff=11,0;high=19,0;low=8,0
NC_017022.1	terminator_00559	2069295	2069331	-	TransTermHP	EFAU004_RS10210	NC_017022.1_transcript1746	TRUE	diff=35,0;high=64,0;low=29,0	diff=41,0;high=76,0;low=35,0	diff=48,0;high=94,0;low=46,0	diff=23,0;high=39,0;low=16,0	diff=20,0;high=39,0;low=19,0	diff=22,0;high=42,0;low=20,0
NC_017022.1	terminator_00560	2072048	2072077	-	TransTermHP	EFAU004_RS10215	NC_017022.1_transcript1748	TRUE	diff=35,0;high=63,0;low=28,0	diff=57,0;high=104,0;low=47,0	diff=53,0;high=100,0;low=47,0	diff=43,0;high=83,0;low=40,0	diff=48,0;high=89,0;low=41,0	diff=58,0;high=101,0;low=43,0
NC_017022.1	terminator_00561	2074845	2074871	-	TransTermHP	EFAU004_RS10230	NC_017022.1_transcript1751	TRUE	diff=6,0;high=10,0;low=4,0	diff=11,0;high=17,0;low=6,0	diff=8,0;high=14,0;low=6,0	diff=23,0;high=40,0;low=17,0	diff=39,0;high=40,0;low=1,0	diff=32,0;high=38,0;low=6,0
NC_017022.1	terminator_00562	2076384	2076435	+	TransTermHP	EFAU004_RS10240	NC_017022.1_transcript1753	FALSE	Not_detect	Not_detect	Not_detect	Not_detect	Not_detect	Not_detect
NC_017022.1	terminator_00563	2077624	2077647	-	TransTermHP	EFAU004_RS10255	NC_017022.1_transcript1758	TRUE	diff=961,0000000030001;high=1124,16666667;low=163,166666667	diff=1310,000000003;high=1551,16666667;low=241,166666667	diff=1372,333333337;high=1618,66666667;low=246,333333333	diff=245,66666666700002;high=342,166666667;low=96,5	diff=233,33333333299998;high=328,833333333;low=95,5	diff=243,33333333400003;high=348,666666667;low=105,333333333
NC_017022.1	terminator_00564	2077749	2077763	-	TransTermHP	EFAU004_RS10260	NC_017022.1_transcript1758	TRUE	diff=2385,0;high=2553,0;low=168,0	diff=3245,0;high=3481,5;low=236,5	diff=3664,0;high=3927,5;low=263,5	diff=7179,5;high=8461,0;low=1281,5	diff=6101,5;high=7332,0;low=1230,5	diff=9240,0;high=10626,5;low=1386,5
NC_017022.1	terminator_00565	2077825	2077838	-	TransTermHP	EFAU004_RS10265	NC_017022.1_transcript1758	TRUE	Not_detect	diff=5,0;high=9,0;low=4,0	diff=9,0;high=17,0;low=8,0	diff=4,0;high=7,0;low=3,0	diff=5,0;high=8,0;low=3,0	diff=3,0;high=3,0;low=0,0
NC_017022.1	terminator_00566	2080209	2080235	-	TransTermHP	EFAU004_RS10285	NC_017022.1_transcript1762	TRUE	Not_detect	diff=22,0;high=42,0;low=20,0	diff=18,0;high=34,0;low=16,0	diff=23,0;high=41,0;low=18,0	diff=15,0;high=28,0;low=13,0	diff=18,0;high=35,0;low=17,0
NC_017022.1	terminator_00567	2082273	2082303	-	TransTermHP	EFAU004_RS10300	NC_017022.1_transcript1763	TRUE	diff=8,0;high=15,0;low=7,0	diff=8,0;high=14,0;low=6,0	diff=14,0;high=24,0;low=10,0	diff=16,25;high=25,25;low=9,0	diff=15,0;high=28,0;low=13,0	diff=16,0;high=31,0;low=15,0
NC_017022.1	terminator_00568	2093060	2093083	-	TransTermHP	EFAU004_RS10355	NC_017022.1_transcript1766	TRUE	diff=11,0;high=20,0;low=9,0	diff=14,0;high=26,0;low=12,0	diff=17,0;high=32,0;low=15,0	diff=22,0;high=43,0;low=21,0	diff=20,0;high=38,0;low=18,0	diff=26,0;high=45,0;low=19,0
NC_017022.1	terminator_00569	2093405	2093447	-	TransTermHP	EFAU004_RS10360	NC_017022.1_transcript1767	TRUE	diff=16,0;high=29,0;low=13,0	diff=16,0;high=29,0;low=13,0	diff=13,0;high=25,0;low=12,0	diff=16,0;high=29,0;low=13,0	diff=11,0;high=20,0;low=9,0	diff=12,0;high=18,0;low=6,0
NC_017022.1	terminator_00570	2096640	2096693	+	gene_converged;TransTermHP	EFAU004_RS10375	NC_017022.1_transcript1768	FALSE	Not_detect	Not_detect	Not_detect	Not_detect	Not_detect	Not_detect
NC_017022.1	terminator_00571	2096642	2096689	-	gene_converged;TransTermHP	EFAU004_RS10380	NC_017022.1_transcript1769	FALSE	Not_detect	Not_detect	Not_detect	Not_detect	Not_detect	Not_detect
NC_017022.1	terminator_00572	2098133	2098182	-	gene_converged;TransTermHP	EFAU004_RS10385	NC_017022.1_transcript1772	TRUE	diff=18,0;high=32,0;low=14,0	diff=25,0;high=38,0;low=13,0	diff=21,0;high=41,0;low=20,0	diff=17,0;high=31,0;low=14,0	diff=12,0;high=22,0;low=10,0	diff=10,0;high=17,0;low=7,0
NC_017022.1	terminator_00573	2101748	2101774	-	TransTermHP	EFAU004_RS10400	NC_017022.1_transcript1772	TRUE	Not_detect	Not_detect	Not_detect	diff=39,0;high=75,0;low=36,0	diff=48,0;high=93,0;low=45,0	diff=36,0;high=71,0;low=35,0
NC_017022.1	terminator_00574	2105593	2105665	+	gene_converged;TransTermHP	EFAU004_RS10415	NC_017022.1_transcript1773	TRUE	diff=283,0;high=342,0;low=59,0	diff=363,0;high=427,0;low=64,0	diff=437,0;high=531,0;low=94,0	diff=83,0;high=100,0;low=17,0	diff=63,0;high=86,0;low=23,0	diff=91,0;high=109,0;low=18,0
NC_017022.1	terminator_00575	2112660	2112693	+	gene_converged;TransTermHP	EFAU004_RS10455	NC_017022.1_transcript1778	TRUE	diff=4,0;high=7,0;low=3,0	diff=3,0;high=5,0;low=2,0	diff=6,8888888888899995;high=10,0;low=3,11111111111	diff=4,41666666667;high=8,25;low=3,83333333333	diff=4,66666666667;high=9,0;low=4,33333333333	diff=3,0;high=4,0;low=1,0
NC_017022.1	terminator_00576	2113690	2113741	+	gene_converged;TransTermHP	EFAU004_RS10465	NC_017022.1_transcript1781	TRUE	diff=19,0;high=37,0;low=18,0	diff=25,6666666667;high=42,0;low=16,3333333333	diff=20,0;high=35,0;low=15,0	diff=25,0;high=46,0;low=21,0	diff=23,0;high=40,0;low=17,0	diff=27,0;high=53,0;low=26,0
NC_017022.1	terminator_00577	2117132	2117152	-	gene_converged	transcript_01784,EFAU004_RS10485	NC_017022.1_transcript1784	TRUE	diff=5,0;high=8,0;low=3,0	diff=6,0;high=11,0;low=5,0	diff=4,0;high=7,0;low=3,0	diff=45,0;high=88,0;low=43,0	diff=36,0;high=67,0;low=31,0	diff=56,791666666699996;high=95,7916666667;low=39,0
NC_017022.1	terminator_00578	2118612	2118634	-	TransTermHP	EFAU004_RS10490	NC_017022.1_transcript1784	TRUE	diff=23,0;high=44,0;low=21,0	diff=28,0;high=54,0;low=26,0	diff=39,0;high=77,0;low=38,0	diff=26,0;high=49,0;low=23,0	diff=29,0;high=56,0;low=27,0	diff=38,0;high=62,0;low=24,0
NC_017022.1	terminator_00579	2128268	2128292	+	gene_converged	transcript_01786,EFAU004_RS10535	NC_017022.1_transcript1786	TRUE	diff=17,75;high=35,0;low=17,25	diff=11,8;high=22,0;low=10,2	diff=17,5;high=33,0;low=15,5	Not_detect	Not_detect	diff=6,9375;high=13,0;low=6,0625
NC_017022.1	terminator_00580	2132829	2132865	-	TransTermHP	EFAU004_RS10555	NC_017022.1_transcript1789	TRUE	diff=18,0;high=29,0;low=11,0	diff=14,0;high=25,0;low=11,0	diff=17,0;high=33,0;low=16,0	diff=8,0;high=14,0;low=6,0	diff=10,0;high=18,0;low=8,0	diff=10,0;high=16,0;low=6,0
NC_017022.1	terminator_00581	2134773	2134806	-	TransTermHP	EFAU004_RS10560	NC_017022.1_transcript1790	TRUE	diff=55,0;high=105,0;low=50,0	diff=82,0;high=151,0;low=69,0	diff=82,0;high=160,0;low=78,0	diff=30,0;high=56,0;low=26,0	diff=31,0;high=61,0;low=30,0	diff=34,0;high=67,0;low=33,0
NC_017022.1	terminator_00582	2137678	2137688	-	TransTermHP	EFAU004_RS10570	NC_017022.1_transcript1790	TRUE	diff=40,0;high=73,0;low=33,0	Not_detect	Not_detect	diff=18,0;high=32,0;low=14,0	Not_detect	diff=28,0;high=54,0;low=26,0
NC_017022.1	terminator_00583	2141368	2141396	-	TransTermHP	EFAU004_RS10590	NC_017022.1_transcript1795	TRUE	diff=1,0;high=1,0;low=0,0	diff=9,0;high=14,0;low=5,0	diff=10,0;high=14,0;low=4,0	diff=15,0;high=29,0;low=14,0	diff=26,0;high=28,0;low=2,0	diff=41,0;high=47,0;low=6,0
NC_017022.1	terminator_00584	2146890	2146915	-	TransTermHP	EFAU004_RS10615	NC_017022.1_transcript1801	TRUE	diff=123,0;high=206,0;low=83,0	diff=150,0;high=243,0;low=93,0	diff=106,0;high=175,0;low=69,0	diff=506,0;high=742,0;low=236,0	diff=563,0;high=785,0;low=222,0	diff=314,0;high=476,0;low=162,0
NC_017022.1	terminator_00585	2148429	2148457	+	gene_converged	transcript_01803	NC_017022.1_transcript1803	TRUE	diff=1,0;high=1,0;low=0,0	diff=2,0;high=2,0;low=0,0	diff=3,0;high=3,0;low=0,0	diff=28,0;high=49,0;low=21,0	diff=24,0;high=27,0;low=3,0	diff=19,0;high=30,0;low=11,0
NC_017022.1	terminator_00586	2149290	2149328	-	gene_converged	EFAU004_RS10620	NC_017022.1_transcript1801	TRUE	diff=2,0;high=2,0;low=0,0	Not_detect	diff=2,0;high=2,0;low=0,0	diff=46,0;high=68,0;low=22,0	diff=30,0;high=55,0;low=25,0	diff=38,0;high=70,0;low=32,0
NC_017022.1	terminator_00587	2159387	2159417	-	TransTermHP	EFAU004_RS10665	NC_017022.1_transcript1811	TRUE	diff=5,0;high=9,0;low=4,0	diff=6,0;high=11,0;low=5,0	diff=16,0;high=27,0;low=11,0	diff=8,0;high=13,0;low=5,0	diff=8,0;high=14,0;low=6,0	diff=11,0;high=16,0;low=5,0
NC_017022.1	terminator_00588	2160284	2160302	-	TransTermHP	EFAU004_RS10670	NA	FALSE	Not_detect	Not_detect	Not_detect	Not_detect	Not_detect	Not_detect
NC_017022.1	terminator_00589	2166448	2166477	-	TransTermHP	EFAU004_RS10705	NA	FALSE	Not_detect	Not_detect	Not_detect	Not_detect	Not_detect	Not_detect
NC_017022.1	terminator_00590	2175701	2175736	-	TransTermHP	EFAU004_RS10770	NC_017022.1_transcript1823	FALSE	Not_detect	Not_detect	Not_detect	Not_detect	Not_detect	Not_detect
NC_017022.1	terminator_00591	2178336	2178375	+	gene_converged	transcript_01829	NC_017022.1_transcript1829	TRUE	Not_detect	Not_detect	diff=1,0;high=1,0;low=0,0	diff=35,0;high=35,0;low=0,0	diff=22,0;high=22,0;low=0,0	diff=18,0;high=18,0;low=0,0
NC_017022.1	terminator_00592	2183309	2183337	+	gene_converged	transcript_01832	NC_017022.1_transcript1832	TRUE	diff=1,0;high=1,0;low=0,0	diff=2,0;high=3,0;low=1,0	diff=3,0;high=5,0;low=2,0	diff=62,0;high=122,0;low=60,0	diff=34,0;high=67,0;low=33,0	diff=75,0;high=142,0;low=67,0
NC_017022.1	terminator_00593	2186175	2186203	-	TransTermHP	EFAU004_RS10840	NC_017022.1_transcript1835	TRUE	diff=10,0;high=18,0;low=8,0	diff=21,0;high=37,0;low=16,0	diff=20,0;high=37,0;low=17,0	diff=18,0;high=32,0;low=14,0	diff=26,0;high=46,0;low=20,0	diff=26,0;high=45,0;low=19,0
NC_017022.1	terminator_00594	2187560	2187593	+	gene_converged	transcript_01836	NC_017022.1_transcript1836	TRUE	diff=2,0;high=2,0;low=0,0	diff=1,0;high=1,0;low=0,0	diff=2,0;high=2,0;low=0,0	diff=23,0;high=23,0;low=0,0	diff=29,0;high=29,0;low=0,0	diff=13,0;high=20,0;low=7,0
NC_017022.1	terminator_00595	2188347	2188365	-	TransTermHP	EFAU004_RS10860	NC_017022.1_transcript1838	TRUE	diff=13,0;high=21,0;low=8,0	diff=15,0;high=29,0;low=14,0	diff=13,0;high=24,0;low=11,0	diff=22,0;high=31,0;low=9,0	diff=13,0;high=19,0;low=6,0	diff=15,0;high=26,0;low=11,0
NC_017022.1	terminator_00596	2196310	2196336	-	TransTermHP	EFAU004_RS10900	NC_017022.1_transcript1847	TRUE	diff=108,2333333333;high=143,1;low=34,8666666667	diff=127,9999999997;high=165,633333333;low=37,6333333333	diff=211,99999999969998;high=258,883333333;low=46,8833333333	diff=5196,41666667;high=5294,41666667;low=98,0	diff=6060,86666667;high=6203,96666667;low=143,1	diff=8583,500000003;high=8762,91666667;low=179,416666667
NC_017022.1	terminator_00597	2197909	2197951	+	gene_converged;TransTermHP	EFAU004_RS10905	NC_017022.1_transcript1848	TRUE	diff=9,0;high=17,0;low=8,0	diff=7,0;high=12,0;low=5,0	diff=6,0;high=8,0;low=2,0	diff=4,0;high=4,0;low=0,0	diff=6,0;high=10,0;low=4,0	diff=3,0;high=5,0;low=2,0
NC_017022.1	terminator_00598	2197909	2197951	-	TransTermHP	EFAU004_RS10910	NC_017022.1_transcript1849	TRUE	diff=61,0;high=66,0;low=5,0	diff=52,0;high=54,0;low=2,0	diff=22,0;high=24,0;low=2,0	diff=18,0;high=23,0;low=5,0	diff=20,0;high=21,0;low=1,0	diff=10,0;high=10,0;low=0,0
NC_017022.1	terminator_00599	2200786	2200815	+	TransTermHP	EFAU004_RS10915	NC_017022.1_transcript1850	TRUE	diff=4,0;high=7,0;low=3,0	diff=3,0;high=5,0;low=2,0	diff=3,0;high=5,0;low=2,0	diff=6,0;high=10,0;low=4,0	diff=4,0;high=7,0;low=3,0	diff=7,0;high=11,0;low=4,0
NC_017022.1	terminator_00600	2211217	2211259	+	gene_converged;TransTermHP	transcript_01859,EFAU004_RS10960	NC_017022.1_transcript1859	TRUE	diff=59,0;high=113,0;low=54,0	diff=109,0;high=116,0;low=7,0	diff=95,0;high=184,0;low=89,0	diff=14,0;high=24,0;low=10,0	diff=22,0;high=34,0;low=12,0	diff=15,0;high=25,0;low=10,0
NC_017022.1	terminator_00601	2211465	2211492	-	gene_converged	transcript_01860	NC_017022.1_transcript1862	TRUE	Not_detect	Not_detect	Not_detect	diff=4,0;high=6,0;low=2,0	diff=7,0;high=12,0;low=5,0	diff=6,0;high=10,0;low=4,0
NC_017022.1	terminator_00602	2215684	2215703	-	TransTermHP	EFAU004_RS10985	NC_017022.1_transcript1868	TRUE	diff=8,0;high=15,0;low=7,0	diff=9,0;high=17,0;low=8,0	Not_detect	diff=9,0;high=17,0;low=8,0	diff=7,0;high=12,0;low=5,0	diff=8,0;high=12,0;low=4,0
NC_017022.1	terminator_00603	2223987	2224023	-	TransTermHP	EFAU004_RS11025	NC_017022.1_transcript1879	TRUE	diff=9,0;high=17,0;low=8,0	diff=16,0;high=27,0;low=11,0	diff=13,0;high=21,0;low=8,0	diff=22,0;high=41,0;low=19,0	diff=10,0;high=19,0;low=9,0	diff=16,0;high=30,0;low=14,0
NC_017022.1	terminator_00604	2225139	2225182	-	TransTermHP	EFAU004_RS11035	NC_017022.1_transcript1881	FALSE	Not_detect	Not_detect	Not_detect	Not_detect	Not_detect	Not_detect
NC_017022.1	terminator_00605	2234190	2234224	-	TransTermHP	EFAU004_RS11065	NC_017022.1_transcript1890	TRUE	diff=32,0;high=61,0;low=29,0	diff=34,0;high=65,0;low=31,0	diff=43,0;high=82,0;low=39,0	diff=22,0;high=39,0;low=17,0	diff=17,0;high=32,0;low=15,0	diff=27,0;high=53,0;low=26,0
NC_017022.1	terminator_00606	2239734	2239765	-	gene_converged;TransTermHP	transcript_01892,EFAU004_RS11090	NC_017022.1_transcript1892	TRUE	diff=21,0;high=38,0;low=17,0	diff=14,0;high=26,0;low=12,0	diff=23,0;high=41,0;low=18,0	diff=7,0;high=13,0;low=6,0	diff=8,0;high=15,0;low=7,0	diff=10,0;high=15,0;low=5,0
NC_017022.1	terminator_00607	2243463	2243514	-	gene_converged;TransTermHP	transcript_01896,EFAU004_RS11105	NC_017022.1_transcript1896	TRUE	diff=4612,75;high=5046,25;low=433,5	diff=6229,75;high=6842,75;low=613,0	diff=5601,66666667;high=6229,16666667;low=627,5	diff=4191,25833333;high=5141,45833333;low=950,2	diff=3304,9583333299997;high=4277,45833333;low=972,5	diff=5214,59166667;high=6157,29166667;low=942,7
NC_017022.1	terminator_00608	2243890	2243942	+	gene_converged;TransTermHP	EFAU004_RS11115	NC_017022.1_transcript1897	TRUE	diff=1397,0;high=1741,0;low=344,0	diff=1563,0;high=1992,0;low=429,0	diff=1590,0;high=2115,0;low=525,0	diff=4165,0;high=4951,0;low=786,0	diff=2579,0;high=3203,0;low=624,0	diff=4536,0;high=5272,0;low=736,0
NC_017022.1	terminator_00609	2245229	2245248	+	TransTermHP	EFAU004_RS15595	NC_017022.1_transcript1900	TRUE	Not_detect	diff=1,0;high=1,0;low=0,0	diff=2,0;high=3,0;low=1,0	diff=51,0;high=51,0;low=0,0	diff=26,0;high=28,0;low=2,0	diff=28,0;high=31,0;low=3,0
NC_017022.1	terminator_00610	2246787	2246842	-	TransTermHP	EFAU004_RS11140	NC_017022.1_transcript1903	TRUE	diff=3764,2;high=4144,7;low=380,5	diff=5038,75;high=5592,25;low=553,5	diff=4304,08333333;high=4847,58333333;low=543,5	diff=801,7833333337;high=888,616666667;low=86,8333333333	diff=810,416666667;high=925,916666667;low=115,5	diff=800,6999999996999;high=899,033333333;low=98,3333333333
NC_017022.1	terminator_00611	2250383	2250410	-	gene_converged	EFAU004_RS11155	NC_017022.1_transcript1903	TRUE	diff=34,7090909091;high=54,9727272727;low=20,2636363636	diff=37,14545454539999;high=72,9818181818;low=35,8363636364	diff=33,973262032099996;high=58,6484848485;low=24,6752228164	diff=86,7236185381;high=158,174242424;low=71,4506238859	diff=64,2475044559;high=127,992424242;low=63,7449197861	diff=52,3780748663;high=99,303030303;low=46,9249554367
NC_017022.1	terminator_00612	2252733	2252757	-	TransTermHP	EFAU004_RS11160	NC_017022.1_transcript1905	TRUE	diff=13,0;high=20,0;low=7,0	diff=10,0;high=13,0;low=3,0	diff=13,0;high=24,0;low=11,0	diff=21,0;high=40,0;low=19,0	diff=22,0;high=42,0;low=20,0	diff=17,0;high=33,0;low=16,0
NC_017022.1	terminator_00613	2253194	2253204	-	TransTermHP	EFAU004_RS11165	NC_017022.1_transcript1905	TRUE	Not_detect	diff=25,0;high=49,0;low=24,0	Not_detect	diff=18,0;high=35,0;low=17,0	Not_detect	diff=19,0;high=36,0;low=17,0
NC_017022.1	terminator_00614	2254873	2254898	+	TransTermHP	EFAU004_RS11170	NC_017022.1_transcript1906	FALSE	Not_detect	Not_detect	Not_detect	Not_detect	Not_detect	Not_detect
NC_017022.1	terminator_00615	2254868	2254903	-	TransTermHP	EFAU004_RS11175	NC_017022.1_transcript1907	TRUE	diff=14,0;high=26,0;low=12,0	diff=14,0;high=23,0;low=9,0	diff=14,0;high=27,0;low=13,0	diff=25,0;high=49,0;low=24,0	diff=18,0;high=33,0;low=15,0	diff=17,0;high=32,0;low=15,0
NC_017022.1	terminator_00616	2257347	2257378	+	TransTermHP	EFAU004_RS11185	NC_017022.1_transcript1910	TRUE	diff=11,0;high=11,0;low=0,0	diff=9,0;high=9,0;low=0,0	diff=5,0;high=9,0;low=4,0	diff=6,0;high=11,0;low=5,0	diff=6,0;high=6,0;low=0,0	diff=6,0;high=11,0;low=5,0
NC_017022.1	terminator_00617	2261078	2261093	-	TransTermHP	EFAU004_RS11215	NC_017022.1_transcript1913	TRUE	diff=616,0;high=1023,0;low=407,0	diff=762,0;high=1261,5;low=499,5	diff=758,0;high=1355,0;low=597,0	diff=228,0;high=425,0;low=197,0	diff=180,0;high=350,0;low=170,0	diff=279,0;high=551,0;low=272,0
NC_017022.1	terminator_00618	2262704	2262734	-	TransTermHP	EFAU004_RS11225	NC_017022.1_transcript1918	TRUE	diff=28,0;high=54,0;low=26,0	diff=25,0;high=49,0;low=24,0	diff=53,5;high=75,0;low=21,5	diff=39,0;high=58,0;low=19,0	diff=29,0;high=56,0;low=27,0	diff=25,0;high=40,0;low=15,0
NC_017022.1	terminator_00619	2263169	2263181	-	TransTermHP	EFAU004_RS11230	NC_017022.1_transcript1919	TRUE	diff=8,0;high=14,0;low=6,0	Not_detect	diff=5,0;high=9,0;low=4,0	diff=28,0;high=34,0;low=6,0	diff=23,0;high=32,0;low=9,0	diff=19,0;high=26,0;low=7,0
NC_017022.1	terminator_00620	2266939	2266969	-	TransTermHP	EFAU004_RS11245	NC_017022.1_transcript1920	TRUE	diff=23,0;high=34,0;low=11,0	diff=14,0;high=26,0;low=12,0	diff=11,0;high=21,0;low=10,0	diff=26,0;high=48,0;low=22,0	diff=17,0;high=28,0;low=11,0	diff=30,0;high=45,0;low=15,0
NC_017022.1	terminator_00621	2272061	2272099	-	TransTermHP	EFAU004_RS11275	NC_017022.1_transcript1923	TRUE	diff=5,0;high=9,0;low=4,0	diff=8,0;high=14,0;low=6,0	diff=6,0;high=10,0;low=4,0	diff=4,0;high=7,0;low=3,0	diff=9,0;high=14,0;low=5,0	Not_detect
NC_017022.1	terminator_00622	2276529	2276584	-	gene_converged;TransTermHP	EFAU004_RS11290	NC_017022.1_transcript1925	FALSE	Not_detect	Not_detect	Not_detect	Not_detect	Not_detect	Not_detect
NC_017022.1	terminator_00623	2280478	2280536	+	gene_converged;TransTermHP	EFAU004_RS15610	NC_017022.1_transcript1929	TRUE	diff=55,5;high=83,0;low=27,5	diff=47,0;high=93,0;low=46,0	diff=73,0;high=131,0;low=58,0	diff=4692,5;high=8326,5;low=3634,0	diff=2928,0;high=5394,0;low=2466,0	diff=4630,5;high=8921,5;low=4291,0
NC_017022.1	terminator_00624	2281686	2281765	+	gene_converged	transcript_01930	NC_017022.1_transcript1930	TRUE	diff=374,0;high=697,0;low=323,0	diff=507,0;high=936,0;low=429,0	diff=542,0;high=1034,0;low=492,0	diff=5546,0;high=7217,0;low=1671,0	diff=3595,28571429;high=4976,0;low=1380,71428571	diff=6536,57142857;high=8468,0;low=1931,42857143
NC_017022.1	terminator_00625	2281908	2281923	-	gene_converged	transcript_01932,EFAU004_RS11310	NC_017022.1_transcript1932	TRUE	diff=11,0;high=16,0;low=5,0	diff=15,0;high=28,0;low=13,0	diff=18,0;high=34,0;low=16,0	diff=13,0;high=23,0;low=10,0	diff=12,0;high=22,0;low=10,0	diff=13,0;high=23,0;low=10,0
NC_017022.1	terminator_00626	2282588	2282631	-	TransTermHP	EFAU004_RS11315	NC_017022.1_transcript1933	TRUE	diff=10,0;high=17,0;low=7,0	diff=7,0;high=13,0;low=6,0	diff=9,0;high=17,0;low=8,0	diff=11,0;high=19,0;low=8,0	diff=17,0;high=28,0;low=11,0	diff=19,0;high=37,0;low=18,0
NC_017022.1	terminator_00627	2283606	2283621	-	TransTermHP	EFAU004_RS11320	NC_017022.1_transcript1933	TRUE	Not_detect	Not_detect	Not_detect	diff=543,0;high=586,0;low=43,0	diff=567,0;high=615,0;low=48,0	diff=402,0;high=456,0;low=54,0
NC_017022.1	terminator_00628	2293299	2293338	+	TransTermHP	EFAU004_RS11360	NC_017022.1_transcript1939	TRUE	diff=6,0;high=7,0;low=1,0	diff=15,0;high=21,0;low=6,0	diff=30,0;high=35,0;low=5,0	diff=1319,0;high=1330,0;low=11,0	diff=976,0;high=990,0;low=14,0	diff=1294,0;high=1304,0;low=10,0
NC_017022.1	terminator_00629	2297368	2297410	+	gene_converged;TransTermHP	EFAU004_RS11370	NC_017022.1_transcript1940	FALSE	Not_detect	Not_detect	Not_detect	Not_detect	Not_detect	Not_detect
NC_017022.1	terminator_00630	2297370	2297410	-	gene_converged;TransTermHP	EFAU004_RS11375	NC_017022.1_transcript1943	TRUE	diff=8,0;high=12,0;low=4,0	diff=12,0;high=21,0;low=9,0	diff=9,0;high=17,0;low=8,0	diff=12,0;high=20,0;low=8,0	diff=6,0;high=10,0;low=4,0	diff=7,0;high=10,0;low=3,0
NC_017022.1	terminator_00631	2300019	2300058	+	gene_converged	EFAU004_RS11385	NC_017022.1_transcript1945	FALSE	Not_detect	Not_detect	Not_detect	Not_detect	Not_detect	Not_detect
NC_017022.1	terminator_00632	2306101	2306146	-	gene_converged;TransTermHP	EFAU004_RS11420	NC_017022.1_transcript1953	TRUE	diff=4,0;high=6,0;low=2,0	diff=6,5;high=12,0;low=5,5	diff=5,0;high=9,0;low=4,0	diff=6,0;high=10,0;low=4,0	diff=5,0;high=8,0;low=3,0	diff=3,0;high=5,0;low=2,0
NC_017022.1	terminator_00633	2315370	2315410	+	gene_converged;TransTermHP	EFAU004_RS11455	NC_017022.1_transcript1957	FALSE	Not_detect	Not_detect	Not_detect	Not_detect	Not_detect	Not_detect
NC_017022.1	terminator_00634	2315375	2315402	-	TransTermHP	EFAU004_RS11460	NC_017022.1_transcript1958	FALSE	Not_detect	Not_detect	Not_detect	Not_detect	Not_detect	Not_detect
NC_017022.1	terminator_00635	2318549	2318573	+	gene_converged	transcript_01960	NC_017022.1_transcript1960	TRUE	diff=1,0;high=1,0;low=0,0	Not_detect	Not_detect	diff=32,0;high=32,0;low=0,0	diff=20,0;high=20,0;low=0,0	diff=22,0;high=22,0;low=0,0
NC_017022.1	terminator_00636	2330753	2330788	+	gene_converged	transcript_01972	NC_017022.1_transcript1972	TRUE	Not_detect	Not_detect	diff=1,0;high=1,0;low=0,0	diff=27,0;high=28,0;low=1,0	diff=14,0;high=14,0;low=0,0	diff=16,5;high=17,5;low=1,0
NC_017022.1	terminator_00637	2333848	2333904	-	gene_converged;TransTermHP	EFAU004_RS11535	NC_017022.1_transcript1977	TRUE	diff=3631,0;high=4008,0;low=377,0	diff=4861,66666667;high=5397,16666667;low=535,5	diff=4558,0;high=5131,0;low=573,0	diff=872,0;high=949,0;low=77,0	diff=927,5;high=1041,5;low=114,0	diff=962,5;high=1048,5;low=86,0
NC_017022.1	terminator_00638	2334434	2334477	-	gene_converged;TransTermHP	EFAU004_RS11545	NC_017022.1_transcript1979	TRUE	diff=45,0;high=60,0;low=15,0	diff=56,0;high=89,0;low=33,0	diff=47,0;high=93,0;low=46,0	diff=33,0;high=63,0;low=30,0	diff=34,0;high=67,0;low=33,0	diff=44,0;high=84,0;low=40,0
NC_017022.1	terminator_00639	2342814	2342855	-	gene_converged;TransTermHP	EFAU004_RS11600	NC_017022.1_transcript1986	FALSE	Not_detect	Not_detect	Not_detect	Not_detect	Not_detect	Not_detect
NC_017022.1	terminator_00640	2343578	2343606	-	TransTermHP	EFAU004_RS11605	NC_017022.1_transcript1987	TRUE	diff=19,0;high=36,0;low=17,0	diff=35,0;high=65,0;low=30,0	diff=55,0;high=108,0;low=53,0	diff=17,0;high=32,0;low=15,0	diff=29,0;high=53,0;low=24,0	diff=42,0;high=80,0;low=38,0
NC_017022.1	terminator_00641	2347368	2347398	+	TransTermHP	EFAU004_RS11620	NC_017022.1_transcript1992	TRUE	diff=2,0;high=2,0;low=0,0	diff=2,0;high=2,0;low=0,0	diff=2,0;high=2,0;low=0,0	diff=18,0;high=27,0;low=9,0	diff=15,0;high=25,0;low=10,0	diff=22,0;high=29,0;low=7,0
NC_017022.1	terminator_00642	2349600	2349648	+	gene_converged;TransTermHP	EFAU004_RS11630	NC_017022.1_transcript1993	TRUE	diff=11,0;high=21,0;low=10,0	diff=19,0;high=34,0;low=15,0	diff=9,0;high=17,0;low=8,0	diff=7,5;high=11,0;low=3,5	diff=16,0;high=23,0;low=7,0	diff=6,0;high=10,0;low=4,0
NC_017022.1	terminator_00643	2359550	2359575	-	TransTermHP	EFAU004_RS11675	NC_017022.1_transcript1995	FALSE	Not_detect	Not_detect	Not_detect	Not_detect	Not_detect	Not_detect
NC_017022.1	terminator_00644	2361694	2361713	-	TransTermHP	EFAU004_RS11685	NC_017022.1_transcript1997	TRUE	diff=9,0;high=17,0;low=8,0	diff=9,0;high=17,0;low=8,0	diff=12,0;high=23,0;low=11,0	diff=19,0;high=37,0;low=18,0	diff=16,0;high=31,0;low=15,0	diff=19,0;high=37,0;low=18,0
NC_017022.1	terminator_00645	2368194	2368225	+	TransTermHP	EFAU004_RS11705	NC_017022.1_transcript2000	TRUE	diff=4,0;high=6,0;low=2,0	diff=7,0;high=12,0;low=5,0	diff=5,0;high=9,0;low=4,0	diff=6,0;high=11,0;low=5,0	diff=3,0;high=5,0;low=2,0	diff=3,0;high=4,0;low=1,0
NC_017022.1	terminator_00646	2369010	2369066	+	TransTermHP	EFAU004_RS11710	NC_017022.1_transcript2001	FALSE	Not_detect	Not_detect	Not_detect	Not_detect	Not_detect	Not_detect
NC_017022.1	terminator_00647	2371957	2372004	-	gene_converged	transcript_02004,EFAU004_RS11735	NC_017022.1_transcript2004	TRUE	diff=254,0;high=268,0;low=14,0	diff=282,0;high=298,0;low=16,0	diff=254,0;high=276,0;low=22,0	diff=49893,0;high=50036,0;low=143,0	diff=44245,0;high=44377,0;low=132,0	diff=52166,0;high=52282,0;low=116,0
NC_017022.1	terminator_00648	2391880	2391931	-	gene_converged;TransTermHP	EFAU004_RS11815	NC_017022.1_transcript2017	TRUE	diff=8,0;high=11,0;low=3,0	diff=8,0;high=13,0;low=5,0	diff=10,0;high=19,0;low=9,0	diff=7,0;high=10,0;low=3,0	diff=5,0;high=7,0;low=2,0	diff=7,0;high=9,0;low=2,0
NC_017022.1	terminator_00649	2396270	2396313	+	TransTermHP	EFAU004_RS11835	NC_017022.1_transcript2022	TRUE	diff=2,0;high=3,0;low=1,0	diff=5,0;high=7,0;low=2,0	diff=5,0;high=7,0;low=2,0	diff=76,0;high=77,0;low=1,0	diff=91,0;high=93,0;low=2,0	diff=112,0;high=115,0;low=3,0
NC_017022.1	terminator_00650	2396270	2396313	-	TransTermHP	EFAU004_RS11840	NC_017022.1_transcript2023	TRUE	diff=37,0;high=43,0;low=6,0	diff=27,0;high=32,0;low=5,0	diff=33,0;high=33,0;low=0,0	diff=1798,0;high=1804,0;low=6,0	diff=1401,0;high=1410,0;low=9,0	diff=1401,0;high=1407,0;low=6,0
NC_017022.1	terminator_00651	2399384	2399410	-	gene_converged	transcript_02029	NC_017022.1_transcript2029	TRUE	diff=10,0;high=16,0;low=6,0	diff=15,0;high=21,0;low=6,0	diff=8,0;high=15,0;low=7,0	diff=4,75;high=8,0;low=3,25	diff=7,0;high=12,0;low=5,0	diff=5,1111111111100005;high=9,11111111111;low=4,0
NC_017022.1	terminator_00652	2399716	2399736	-	TransTermHP	UNK	NC_017022.1_transcript2030	TRUE	diff=25,0;high=34,0;low=9,0	diff=32,0;high=45,0;low=13,0	diff=23,0;high=41,0;low=18,0	diff=741,0;high=773,0;low=32,0	diff=703,0;high=733,0;low=30,0	diff=663,0;high=686,0;low=23,0
NC_017022.1	terminator_00653	2400130	2400158	+	gene_converged	transcript_02032	NC_017022.1_transcript2032	TRUE	Not_detect	Not_detect	Not_detect	diff=1,0;high=1,0;low=0,0	diff=17,0;high=23,0;low=6,0	diff=19,0;high=22,0;low=3,0
NC_017022.1	terminator_00654	2421582	2421602	-	TransTermHP	EFAU004_RS11985	NC_017022.1_transcript2046	TRUE	diff=2,0;high=2,0;low=0,0	diff=2,0;high=2,0;low=0,0	Not_detect	diff=11,3333333333;high=11,3333333333;low=0,0	diff=18,0;high=20,0;low=2,0	diff=19,0;high=19,0;low=0,0
NC_017022.1	terminator_00655	2431221	2431287	+	gene_converged	EFAU004_RS12075	NC_017022.1_transcript2055	TRUE	diff=26,0;high=51,0;low=25,0	diff=35,0;high=66,0;low=31,0	diff=30,0;high=51,0;low=21,0	diff=13,0;high=21,0;low=8,0	diff=12,0;high=22,0;low=10,0	diff=16,0;high=31,0;low=15,0
NC_017022.1	terminator_00656	2434840	2434860	+	gene_converged	EFAU004_RS12100	NC_017022.1_transcript2063	FALSE	Not_detect	Not_detect	Not_detect	Not_detect	Not_detect	Not_detect
NC_017022.1	terminator_00657	2434902	2434937	-	gene_converged;TransTermHP	EFAU004_RS12105	NC_017022.1_transcript2065	TRUE	diff=9,0;high=16,0;low=7,0	diff=11,0;high=17,0;low=6,0	diff=6,0;high=11,0;low=5,0	diff=9,0;high=17,0;low=8,0	diff=8,0;high=15,0;low=7,0	diff=9,0;high=17,0;low=8,0
NC_017022.1	terminator_00658	2437803	2437854	+	TransTermHP	EFAU004_RS12115	NC_017022.1_transcript2067	FALSE	Not_detect	Not_detect	Not_detect	Not_detect	Not_detect	Not_detect
NC_017022.1	terminator_00659	2439988	2440037	-	gene_converged;TransTermHP	EFAU004_RS12130	NC_017022.1_transcript2070	TRUE	diff=8,0;high=12,0;low=4,0	diff=5,0;high=9,0;low=4,0	diff=6,0;high=9,0;low=3,0	diff=6,0;high=10,0;low=4,0	diff=9,0;high=11,0;low=2,0	diff=9,0;high=13,0;low=4,0
NC_017022.1	terminator_00660	2439992	2440038	+	gene_converged;TransTermHP	transcript_02069,EFAU004_RS12125	NC_017022.1_transcript2069	TRUE	diff=11,0;high=12,0;low=1,0	diff=11,0;high=12,0;low=1,0	diff=13,0;high=13,0;low=0,0	diff=9,0;high=17,0;low=8,0	diff=18,0;high=18,0;low=0,0	diff=16,0;high=16,0;low=0,0
NC_017022.1	terminator_00661	2445751	2445771	+	gene_converged	transcript_02073	NC_017022.1_transcript2073	TRUE	Not_detect	Not_detect	Not_detect	diff=20,0;high=20,0;low=0,0	diff=23,0;high=23,0;low=0,0	diff=13,0;high=13,0;low=0,0
NC_017022.1	terminator_00662	2445799	2445829	-	TransTermHP	EFAU004_RS12155	NC_017022.1_transcript2074	TRUE	diff=4,0;high=7,0;low=3,0	diff=3,0;high=4,0;low=1,0	diff=4,0;high=6,0;low=2,0	diff=6,0;high=11,0;low=5,0	diff=7,0;high=12,0;low=5,0	diff=1,0;high=1,0;low=0,0
NC_017022.1	terminator_00663	2447726	2447779	+	gene_converged;TransTermHP	transcript_02077,EFAU004_RS12165	NC_017022.1_transcript2077	TRUE	diff=632,0;high=1067,0;low=435,0	diff=915,0;high=1405,0;low=490,0	diff=862,0;high=1512,0;low=650,0	diff=2011,0;high=2379,0;low=368,0	diff=1603,0;high=1925,0;low=322,0	diff=2053,0;high=2475,0;low=422,0
NC_017022.1	terminator_00664	2447813	2447834	-	gene_converged	transcript_02078	NC_017022.1_transcript2078	TRUE	diff=14,788095238099999;high=28,2320512821;low=13,443956044	diff=19,4652014652;high=35,6956043956;low=16,2304029304	diff=24,0925824176;high=46,7891025641;low=22,6965201465	diff=999,4642857130001;high=1756,14157509;low=756,677289377	diff=736,121428567;high=1331,79935897;low=595,677930403	diff=928,5261904749999;high=1686,40128205;low=757,875091575
NC_017022.1	terminator_00665	2449094	2449105	-	TransTermHP	EFAU004_RS12180	NA	FALSE	Not_detect	Not_detect	Not_detect	Not_detect	Not_detect	Not_detect
NC_017022.1	terminator_00666	2460553	2460608	-	gene_converged;TransTermHP	EFAU004_RS12235	NC_017022.1_transcript2089	TRUE	diff=4,0;high=6,0;low=2,0	diff=4,0;high=6,0;low=2,0	diff=3,0;high=5,0;low=2,0	diff=19,0;high=23,0;low=4,0	diff=16,0;high=24,0;low=8,0	diff=23,0;high=28,0;low=5,0
NC_017022.1	terminator_00667	2460564	2460602	+	TransTermHP	EFAU004_RS12230	NC_017022.1_transcript2088	TRUE	diff=10,0;high=18,0;low=8,0	diff=13,0;high=24,0;low=11,0	diff=15,0;high=24,0;low=9,0	diff=21,0;high=40,0;low=19,0	diff=22,0;high=35,0;low=13,0	diff=13,0;high=21,0;low=8,0
NC_017022.1	terminator_00668	2461719	2461737	+	gene_converged	transcript_02090	NC_017022.1_transcript2090	TRUE	diff=1,0;high=1,0;low=0,0	diff=2,0;high=3,0;low=1,0	diff=2,0;high=2,0;low=0,0	diff=27,0;high=33,0;low=6,0	diff=18,0;high=19,0;low=1,0	diff=23,0;high=25,0;low=2,0
NC_017022.1	terminator_00669	2461971	2462017	-	gene_converged;TransTermHP	transcript_02091,EFAU004_RS12240	NC_017022.1_transcript2091	TRUE	diff=12,0;high=19,0;low=7,0	diff=7,0;high=13,0;low=6,0	diff=8,0;high=13,0;low=5,0	diff=2,0;high=3,0;low=1,0	diff=29,0;high=46,0;low=17,0	diff=27,0;high=41,0;low=14,0
NC_017022.1	terminator_00670	2466782	2466846	+	gene_converged	transcript_02098	NC_017022.1_transcript2098	TRUE	diff=35,041666666599994;high=63,9583333333;low=28,9166666667	diff=50,8333333334;high=91,7916666667;low=40,9583333333	diff=64,70833333370001;high=123,166666667;low=58,4583333333	diff=3439,4583333299997;high=5509,83333333;low=2070,375	diff=2841,625;high=4632,16666667;low=1790,54166667	diff=3503,4583333299997;high=5831,33333333;low=2327,875
NC_017022.1	terminator_00671	2468767	2468796	-	TransTermHP	EFAU004_RS12270	NC_017022.1_transcript2101	TRUE	diff=26,0;high=50,0;low=24,0	diff=27,0;high=50,0;low=23,0	diff=35,0;high=66,0;low=31,0	diff=53,0;high=84,0;low=31,0	diff=33,0;high=63,0;low=30,0	diff=57,0;high=99,0;low=42,0
NC_017022.1	terminator_00672	2474497	2474511	-	TransTermHP	EFAU004_RS12305	NA	FALSE	Not_detect	Not_detect	Not_detect	Not_detect	Not_detect	Not_detect
NC_017022.1	terminator_00673	2475457	2475502	-	TransTermHP	EFAU004_RS12310	NC_017022.1_transcript2107	FALSE	Not_detect	Not_detect	Not_detect	Not_detect	Not_detect	Not_detect
NC_017022.1	terminator_00674	2476085	2476101	-	TransTermHP	EFAU004_RS12315	NC_017022.1_transcript2107	TRUE	diff=8,0;high=12,0;low=4,0	diff=4,0;high=6,0;low=2,0	diff=5,0;high=9,0;low=4,0	Not_detect	Not_detect	Not_detect
NC_017022.1	terminator_00675	2477306	2477355	-	gene_converged;TransTermHP	EFAU004_RS12330	NC_017022.1_transcript2110	FALSE	Not_detect	Not_detect	Not_detect	Not_detect	Not_detect	Not_detect
NC_017022.1	terminator_00676	2477307	2477356	+	gene_converged;TransTermHP	EFAU004_RS12325	NC_017022.1_transcript2109	FALSE	Not_detect	Not_detect	Not_detect	Not_detect	Not_detect	Not_detect
NC_017022.1	terminator_00677	2488924	2488960	-	TransTermHP	EFAU004_RS12385	NC_017022.1_transcript2123	TRUE	diff=386,0;high=694,0;low=308,0	diff=482,0;high=847,0;low=365,0	diff=608,0;high=1092,0;low=484,0	diff=81464,0;high=82691,0;low=1227,0	diff=74099,0;high=75243,0;low=1144,0	diff=82887,0;high=84239,0;low=1352,0
NC_017022.1	terminator_00678	2490697	2490753	+	gene_converged;TransTermHP	EFAU004_RS12390	NC_017022.1_transcript2125	TRUE	diff=3,0;high=3,0;low=0,0	diff=6,0;high=11,0;low=5,0	diff=4,0;high=6,0;low=2,0	diff=3,0;high=4,0;low=1,0	diff=4,0;high=6,0;low=2,0	diff=5,92307692308;high=8,0;low=2,07692307692
NC_017022.1	terminator_00679	2490709	2490741	-	TransTermHP	EFAU004_RS12395	NC_017022.1_transcript2126	TRUE	diff=9,0;high=10,0;low=1,0	diff=16,0;high=16,0;low=0,0	diff=13,0;high=14,0;low=1,0	diff=20,0;high=21,0;low=1,0	diff=8,0;high=15,0;low=7,0	diff=10,0;high=12,0;low=2,0
NC_017022.1	terminator_00680	2500767	2500793	-	TransTermHP	EFAU004_RS12445	NC_017022.1_transcript2133	TRUE	diff=7,0;high=12,0;low=5,0	diff=11,0;high=20,0;low=9,0	diff=6,0;high=10,0;low=4,0	diff=9,0;high=17,0;low=8,0	diff=11,0;high=21,0;low=10,0	diff=15,0;high=26,0;low=11,0
NC_017022.1	terminator_00681	2501746	2501781	-	TransTermHP	EFAU004_RS12450	NC_017022.1_transcript2134	TRUE	diff=29,0;high=57,0;low=28,0	diff=16,0;high=31,0;low=15,0	diff=25,0;high=48,0;low=23,0	diff=36,0;high=67,0;low=31,0	diff=31,0;high=46,0;low=15,0	diff=29,0;high=56,0;low=27,0
NC_017022.1	terminator_00682	2515399	2515426	-	TransTermHP	EFAU004_RS12495	NC_017022.1_transcript2144	TRUE	diff=6,0;high=11,0;low=5,0	diff=8,0;high=13,0;low=5,0	diff=9,0;high=14,0;low=5,0	diff=12,0;high=22,0;low=10,0	diff=12,0;high=20,0;low=8,0	diff=16,0;high=30,0;low=14,0
NC_017022.1	terminator_00683	2520889	2520929	+	gene_converged;TransTermHP	EFAU004_RS12510	NC_017022.1_transcript2147	TRUE	diff=2,0;high=2,0;low=0,0	diff=3,0;high=4,0;low=1,0	diff=3,0;high=4,0;low=1,0	diff=4,0;high=5,0;low=1,0	diff=6,0;high=11,0;low=5,0	diff=5,0;high=9,0;low=4,0
NC_017022.1	terminator_00684	2521970	2521995	+	gene_converged	transcript_02150	NC_017022.1_transcript2150	TRUE	Not_detect	Not_detect	Not_detect	diff=21,0;high=21,0;low=0,0	diff=29,0;high=29,0;low=0,0	diff=13,0;high=13,0;low=0,0
NC_017022.1	terminator_00685	2522294	2522341	-	gene_converged;TransTermHP	transcript_02151,EFAU004_RS12520	NC_017022.1_transcript2151	TRUE	diff=10,0;high=19,0;low=9,0	diff=8,0;high=12,0;low=4,0	diff=8,0;high=12,0;low=4,0	diff=6,0;high=10,0;low=4,0	diff=8,0;high=14,0;low=6,0	diff=3,0;high=5,0;low=2,0
NC_017022.1	terminator_00686	2529833	2529868	+	TransTermHP	EFAU004_RS12550	NC_017022.1_transcript2156	TRUE	diff=3490,0;high=6547,0;low=3057,0	diff=4541,0;high=8569,0;low=4028,0	diff=5760,333333299999;high=11499,3333333;low=5739,0	diff=2291,0;high=4448,0;low=2157,0	diff=2564,0;high=5070,0;low=2506,0	diff=2832,0;high=5496,0;low=2664,0
NC_017022.1	terminator_00687	2530747	2530765	+	TransTermHP	EFAU004_RS12560	NC_017022.1_transcript2156	TRUE	diff=18,0;high=32,0;low=14,0	diff=23,0;high=42,0;low=19,0	diff=25,0;high=47,0;low=22,0	diff=20,0;high=35,0;low=15,0	diff=22,0;high=43,0;low=21,0	diff=15,0;high=27,0;low=12,0
NC_017022.1	terminator_00688	2531512	2531531	+	TransTermHP	EFAU004_RS15720	NC_017022.1_transcript2159	TRUE	diff=358,0;high=425,0;low=67,0	diff=427,0;high=479,0;low=52,0	diff=519,0;high=589,0;low=70,0	diff=4332,0;high=4433,0;low=101,0	diff=3525,0;high=3612,0;low=87,0	diff=4834,5;high=4942,5;low=108,0
NC_017022.1	terminator_00689	2533632	2533676	-	gene_converged;TransTermHP	EFAU004_RS12570	NC_017022.1_transcript2160	TRUE	diff=4,0;high=7,0;low=3,0	diff=4,0;high=7,0;low=3,0	diff=9,0;high=12,0;low=3,0	diff=10,0;high=17,0;low=7,0	diff=5,0;high=9,0;low=4,0	diff=7,0;high=12,0;low=5,0
NC_017022.1	terminator_00690	2535975	2535995	-	TransTermHP	EFAU004_RS12580	NA	FALSE	Not_detect	Not_detect	Not_detect	Not_detect	Not_detect	Not_detect
NC_017022.1	terminator_00691	2541673	2541722	+	gene_converged;TransTermHP	EFAU004_RS12615	NC_017022.1_transcript2164	FALSE	Not_detect	Not_detect	Not_detect	Not_detect	Not_detect	Not_detect
NC_017022.1	terminator_00692	2542460	2542495	-	TransTermHP	EFAU004_RS12625	NC_017022.1_transcript2166	TRUE	Not_detect	diff=12,0;high=23,0;low=11,0	Not_detect	diff=13,0;high=23,0;low=10,0	diff=12,0;high=18,0;low=6,0	Not_detect
NC_017022.1	terminator_00693	2543385	2543402	-	gene_converged	transcript_02168,EFAU004_RS12630	NC_017022.1_transcript2168	TRUE	diff=9,0;high=16,0;low=7,0	diff=9,0;high=16,0;low=7,0	diff=19,0;high=36,0;low=17,0	diff=23,0;high=44,0;low=21,0	diff=14,0;high=26,0;low=12,0	diff=16,0;high=31,0;low=15,0
NC_017022.1	terminator_00694	2547522	2547569	-	gene_converged;TransTermHP	EFAU004_RS12655	NC_017022.1_transcript2171	TRUE	diff=5,0;high=9,0;low=4,0	diff=4,0;high=7,0;low=3,0	diff=12,0;high=21,0;low=9,0	diff=2,0;high=2,0;low=0,0	Not_detect	diff=2,0;high=3,0;low=1,0
NC_017022.1	terminator_00695	2547525	2547568	+	gene_converged;TransTermHP	EFAU004_RS12650	NC_017022.1_transcript2170	TRUE	diff=8,0;high=11,0;low=3,0	diff=4,0;high=7,0;low=3,0	diff=8,0;high=11,0;low=3,0	diff=3,0;high=4,0;low=1,0	diff=5,0;high=6,0;low=1,0	diff=2,0;high=2,0;low=0,0
NC_017022.1	terminator_00696	2553879	2553900	-	TransTermHP	rrf	NC_017022.1_transcript2174	TRUE	diff=13693,7000001;high=26539,9833334;low=12846,2833333	diff=20949,066666600003;high=39885,5666666;low=18936,5	diff=17235,149999999998;high=33749,2166667;low=16514,0666667	diff=4756,349999999999;high=9364,61666667;low=4608,26666667	diff=4904,116666670001;high=9682,01666667;low=4777,9	diff=5834,63333334;high=11458,25;low=5623,61666666
NC_017022.1	terminator_00697	2557340	2557367	-	gene_converged	EFAU004_RS12685	NC_017022.1_transcript2174	TRUE	diff=34,7090909091;high=54,9727272727;low=20,2636363636	diff=37,14545454539999;high=72,9818181818;low=35,8363636364	diff=33,973262032099996;high=58,6484848485;low=24,6752228164	diff=86,7236185381;high=158,174242424;low=71,4506238859	diff=64,2475044559;high=127,992424242;low=63,7449197861	diff=52,3780748663;high=99,303030303;low=46,9249554367
NC_017022.1	terminator_00698	2562155	2562215	-	gene_converged	transcript_02178,EFAU004_RS15735	NC_017022.1_transcript2178	FALSE	Not_detect	Not_detect	Not_detect	Not_detect	Not_detect	Not_detect
NC_017022.1	terminator_00699	2575688	2575708	-	gene_converged	transcript_02183	NC_017022.1_transcript2183	TRUE	Not_detect	Not_detect	Not_detect	diff=16,0;high=17,0;low=1,0	diff=11,0;high=11,0;low=0,0	diff=16,0;high=16,0;low=0,0
NC_017022.1	terminator_00700	2577027	2577047	+	TransTermHP	EFAU004_RS12755	NC_017022.1_transcript2184	FALSE	Not_detect	Not_detect	Not_detect	Not_detect	Not_detect	Not_detect
NC_017022.1	terminator_00701	2584887	2584935	-	gene_converged;TransTermHP	EFAU004_RS12790	NC_017022.1_transcript2186	TRUE	diff=11,0;high=21,25;low=10,25	diff=13,058823529400001;high=25,4754901961;low=12,4166666667	diff=16,0;high=31,2833333333;low=15,2833333333	diff=12,993055555500002;high=23,6847222222;low=10,6916666667	diff=19,3333333333;high=28,6458333333;low=9,3125	diff=11,6125;high=22,8625;low=11,25
NC_017022.1	terminator_00702	2597122	2597161	+	gene_converged	EFAU004_RS12825	NC_017022.1_transcript2196	TRUE	Not_detect	diff=6,5;high=7,5;low=1,0	diff=4,0;high=7,0;low=3,0	diff=99,027027027;high=150,027027027;low=51,0	diff=77,076923077;high=104,076923077;low=27,0	diff=145,5;high=215,5;low=70,0
NC_017022.1	terminator_00703	2605450	2605491	-	TransTermHP	EFAU004_RS12860	NC_017022.1_transcript2202	TRUE	diff=8,0;high=14,0;low=6,0	diff=8,0;high=15,0;low=7,0	diff=7,0;high=13,0;low=6,0	diff=2,0;high=3,0;low=1,0	diff=6,0;high=10,0;low=4,0	diff=5,0;high=8,0;low=3,0
NC_017022.1	terminator_00704	2610339	2610397	+	gene_converged;TransTermHP	EFAU004_RS12875	NC_017022.1_transcript2206	TRUE	diff=1,0;high=1,0;low=0,0	diff=5,0;high=8,0;low=3,0	diff=6,0;high=8,0;low=2,0	diff=6,0;high=10,0;low=4,0	diff=4,0;high=7,0;low=3,0	diff=10,0;high=19,0;low=9,0
NC_017022.1	terminator_00705	2610345	2610391	-	gene_converged;TransTermHP	EFAU004_RS12880	NC_017022.1_transcript2207	FALSE	Not_detect	Not_detect	Not_detect	Not_detect	Not_detect	Not_detect
NC_017022.1	terminator_00706	2612392	2612413	+	gene_converged	transcript_02208	NC_017022.1_transcript2208	TRUE	diff=2,0;high=3,0;low=1,0	diff=1,0;high=1,0;low=0,0	diff=1,0;high=1,0;low=0,0	diff=15,0;high=29,0;low=14,0	diff=11,0;high=11,0;low=0,0	diff=30,0;high=31,0;low=1,0
NC_017022.1	terminator_00707	2615400	2615440	+	TransTermHP	EFAU004_RS12905	NC_017022.1_transcript2210	TRUE	diff=6,0;high=10,0;low=4,0	diff=4,0;high=5,0;low=1,0	diff=4,0;high=7,0;low=3,0	diff=3,0;high=4,0;low=1,0	diff=5,0;high=6,0;low=1,0	diff=2,0;high=3,0;low=1,0
NC_017022.1	terminator_00708	2627455	2627495	-	gene_converged	transcript_02220	NC_017022.1_transcript2220	TRUE	diff=3,0;high=3,0;low=0,0	diff=1,0;high=1,0;low=0,0	Not_detect	diff=54,0;high=62,0;low=8,0	diff=29,0;high=31,0;low=2,0	diff=37,0;high=39,0;low=2,0
NC_017022.1	terminator_00709	2627646	2627682	+	TransTermHP	EFAU004_RS12940	NA	FALSE	Not_detect	Not_detect	Not_detect	Not_detect	Not_detect	Not_detect
NC_017022.1	terminator_00710	2629833	2629865	-	TransTermHP	EFAU004_RS12950	NC_017022.1_transcript2223	TRUE	diff=8,0;high=14,0;low=6,0	diff=9,0;high=17,0;low=8,0	diff=8,0;high=15,0;low=7,0	diff=12,0;high=18,0;low=6,0	diff=6,0;high=8,0;low=2,0	diff=7,0;high=10,0;low=3,0
NC_017022.1	terminator_00711	2632453	2632482	-	TransTermHP	EFAU004_RS12955	NC_017022.1_transcript2224	TRUE	diff=21,0;high=37,0;low=16,0	diff=19,0;high=37,0;low=18,0	diff=20,0;high=39,0;low=19,0	diff=37,0;high=53,0;low=16,0	diff=28,0;high=54,0;low=26,0	diff=24,0;high=46,0;low=22,0
NC_017022.1	terminator_00712	2637319	2637359	+	gene_converged;TransTermHP	EFAU004_RS12970	NC_017022.1_transcript2227	FALSE	Not_detect	Not_detect	Not_detect	Not_detect	Not_detect	Not_detect
NC_017022.1	terminator_00713	2641787	2641843	+	gene_converged;TransTermHP	EFAU004_RS12985	NC_017022.1_transcript2230	FALSE	Not_detect	Not_detect	Not_detect	Not_detect	Not_detect	Not_detect
NC_017022.1	terminator_00714	2641789	2641836	-	gene_converged;TransTermHP	EFAU004_RS12990	NC_017022.1_transcript2231	FALSE	Not_detect	Not_detect	Not_detect	Not_detect	Not_detect	Not_detect
NC_017022.1	terminator_00715	2642668	2642683	-	TransTermHP	EFAU004_RS12995	NC_017022.1_transcript2231	TRUE	diff=78,0;high=102,0;low=24,0	diff=83,0;high=108,0;low=25,0	diff=85,0;high=115,0;low=30,0	diff=2690,0;high=2732,0;low=42,0	diff=2191,0;high=2225,0;low=34,0	diff=2759,0;high=2819,0;low=60,0
NC_017022.1	terminator_00716	2644285	2644318	-	TransTermHP	EFAU004_RS13000	NC_017022.1_transcript2232	TRUE	diff=4,0;high=6,0;low=2,0	diff=4,66666666667;high=9,0;low=4,33333333333	diff=9,0;high=16,0;low=7,0	diff=9,0;high=16,0;low=7,0	diff=8,0;high=12,0;low=4,0	diff=14,0;high=20,0;low=6,0
NC_017022.1	terminator_00717	2645884	2645896	-	TransTermHP	EFAU004_RS13010	NC_017022.1_transcript2234	TRUE	diff=519,0;high=604,0;low=85,0	diff=638,5;high=772,5;low=134,0	diff=657,5;high=807,0;low=149,5	diff=192,5;high=255,5;low=63,0	diff=263,0;high=340,0;low=77,0	diff=214,16666666700002;high=277,166666667;low=63,0
NC_017022.1	terminator_00718	2649520	2649547	-	gene_converged	EFAU004_RS13030	NC_017022.1_transcript2235	TRUE	diff=34,7090909091;high=54,9727272727;low=20,2636363636	diff=37,14545454539999;high=72,9818181818;low=35,8363636364	diff=33,973262032099996;high=58,6484848485;low=24,6752228164	diff=86,7236185381;high=158,174242424;low=71,4506238859	diff=64,2475044559;high=127,992424242;low=63,7449197861	diff=52,3780748663;high=99,303030303;low=46,9249554367
NC_017022.1	terminator_00719	2651861	2651886	-	TransTermHP	EFAU004_RS13035	NC_017022.1_transcript2238	TRUE	diff=7,0;high=12,0;low=5,0	diff=12,0;high=23,0;low=11,0	diff=9,0;high=17,0;low=8,0	diff=14,0;high=24,0;low=10,0	diff=12,0;high=22,0;low=10,0	diff=18,0;high=31,0;low=13,0
NC_017022.1	terminator_00720	2653454	2653481	-	TransTermHP	EFAU004_RS13040	NC_017022.1_transcript2238	TRUE	diff=20,0;high=38,0;low=18,0	diff=31,0;high=59,0;low=28,0	diff=22,0;high=42,0;low=20,0	diff=14,0;high=27,0;low=13,0	Not_detect	diff=12,0;high=22,0;low=10,0
NC_017022.1	terminator_00721	2655547	2655584	-	TransTermHP	EFAU004_RS13050	NC_017022.1_transcript2240	TRUE	diff=11,0;high=14,0;low=3,0	diff=12,0;high=22,0;low=10,0	diff=9,0;high=17,0;low=8,0	diff=7,0;high=12,0;low=5,0	diff=4,0;high=7,0;low=3,0	diff=6,0;high=10,0;low=4,0
NC_017022.1	terminator_00722	2658758	2658805	+	gene_converged	transcript_02242	NC_017022.1_transcript2242	TRUE	diff=1,0;high=1,0;low=0,0	diff=2,0;high=3,0;low=1,0	Not_detect	diff=68,0;high=71,0;low=3,0	diff=61,0;high=62,0;low=1,0	diff=54,0;high=55,0;low=1,0
NC_017022.1	terminator_00723	2659827	2659877	-	gene_converged;TransTermHP	EFAU004_RS13065	NC_017022.1_transcript2243	TRUE	diff=13,0;high=24,0;low=11,0	diff=18,0;high=31,0;low=13,0	diff=27,0;high=49,0;low=22,0	diff=25,0;high=49,0;low=24,0	diff=26,0;high=50,0;low=24,0	diff=32,0;high=61,0;low=29,0
NC_017022.1	terminator_00724	2662510	2662552	-	gene_converged	EFAU004_RS13085	NC_017022.1_transcript2243	TRUE	diff=18,0;high=28,0;low=10,0	diff=10,0;high=19,0;low=9,0	Not_detect	diff=8,0;high=14,0;low=6,0	diff=9,0;high=17,0;low=8,0	Not_detect
NC_017022.1	terminator_00725	2668261	2668287	+	TransTermHP	EFAU004_RS13095	NC_017022.1_transcript2246	TRUE	diff=17,0;high=32,0;low=15,0	diff=16,0;high=26,0;low=10,0	diff=15,0;high=26,0;low=11,0	diff=12,0;high=22,0;low=10,0	diff=19,0;high=36,0;low=17,0	diff=8,0;high=14,0;low=6,0
NC_017022.1	terminator_00726	2669828	2669878	-	gene_converged;TransTermHP	EFAU004_RS13105	NC_017022.1_transcript2249	FALSE	Not_detect	Not_detect	Not_detect	Not_detect	Not_detect	Not_detect
NC_017022.1	terminator_00727	2669829	2669879	+	gene_converged;TransTermHP	EFAU004_RS13100	NC_017022.1_transcript2247	FALSE	Not_detect	Not_detect	Not_detect	Not_detect	Not_detect	Not_detect
NC_017022.1	terminator_00728	2673144	2673183	+	gene_converged;TransTermHP	EFAU004_RS13115	NC_017022.1_transcript2250	FALSE	Not_detect	Not_detect	Not_detect	Not_detect	Not_detect	Not_detect
NC_017022.1	terminator_00729	2673150	2673174	-	TransTermHP	EFAU004_RS13120	NC_017022.1_transcript2257	TRUE	diff=8,0;high=13,0;low=5,0	diff=11,0;high=19,0;low=8,0	diff=8,0;high=14,0;low=6,0	diff=5,0;high=9,0;low=4,0	diff=9,0;high=15,0;low=6,0	diff=6,0;high=11,0;low=5,0
NC_017022.1	terminator_00730	2674869	2674890	+	gene_converged	transcript_02258	NC_017022.1_transcript2258	TRUE	diff=3,0;high=4,0;low=1,0	diff=1,0;high=1,0;low=0,0	diff=3,0;high=4,0;low=1,0	diff=100,0;high=100,0;low=0,0	diff=91,0;high=94,0;low=3,0	diff=117,0;high=119,0;low=2,0
NC_017022.1	terminator_00731	2674938	2674960	-	gene_converged	transcript_02259,EFAU004_RS15775	NC_017022.1_transcript2259	TRUE	diff=4,0;high=5,0;low=1,0	diff=3,0;high=5,0;low=2,0	diff=6,0;high=10,0;low=4,0	diff=5,0;high=9,0;low=4,0	diff=7,0;high=13,0;low=6,0	diff=3,0;high=4,0;low=1,0
NC_017022.1	terminator_00732	2678820	2678849	-	TransTermHP	EFAU004_RS13150	NC_017022.1_transcript2260	TRUE	diff=9,0;high=17,0;low=8,0	diff=9,0;high=16,0;low=7,0	diff=10,0;high=17,0;low=7,0	diff=4,0;high=6,0;low=2,0	diff=8,0;high=14,0;low=6,0	diff=7,0;high=11,0;low=4,0
NC_017022.1	terminator_00733	2687020	2687066	-	gene_converged;TransTermHP	transcript_02264,EFAU004_RS13180	NC_017022.1_transcript2264	TRUE	diff=23,0;high=43,0;low=20,0	diff=19,0;high=36,0;low=17,0	diff=28,0;high=53,0;low=25,0	diff=7,0;high=12,0;low=5,0	diff=12,0;high=22,0;low=10,0	diff=8,0;high=14,0;low=6,0
NC_017022.1	terminator_00734	2688232	2688271	+	gene_converged	transcript_02265	NC_017022.1_transcript2265	TRUE	diff=11,0;high=14,0;low=3,0	diff=8,0;high=11,0;low=3,0	diff=20,0;high=30,0;low=10,0	diff=508,932972973;high=817,0;low=308,067027027	diff=347,956521739;high=609,0;low=261,043478261	diff=473,0;high=813,0625;low=340,0625
NC_017022.1	terminator_00735	2692720	2692777	-	gene_converged;TransTermHP	EFAU004_RS13215	NC_017022.1_transcript2269	TRUE	diff=41,0;high=79,0;low=38,0	diff=44,0;high=83,0;low=39,0	diff=68,0;high=133,0;low=65,0	diff=45,0;high=76,0;low=31,0	diff=37,0;high=71,0;low=34,0	diff=38,0;high=71,0;low=33,0
NC_017022.1	terminator_00736	2692726	2692770	+	TransTermHP	EFAU004_RS13210	NC_017022.1_transcript2268	TRUE	diff=5,0;high=7,0;low=2,0	diff=12,0;high=13,0;low=1,0	diff=17,0;high=17,0;low=0,0	diff=6,0;high=6,0;low=0,0	diff=8,0;high=8,0;low=0,0	diff=3,0;high=3,0;low=0,0
NC_017022.1	terminator_00737	2696070	2696095	-	TransTermHP	EFAU004_RS13230	NC_017022.1_transcript2270	TRUE	diff=9,0;high=11,0;low=2,0	diff=6,0;high=10,0;low=4,0	diff=6,0;high=11,0;low=5,0	diff=9,129166666700002;high=17,1291666667;low=8,0	diff=8,0625;high=16,0625;low=8,0	diff=12,1125;high=24,1125;low=12,0
NC_017022.1	terminator_00738	2700072	2700100	-	TransTermHP	EFAU004_RS13250	NC_017022.1_transcript2274	TRUE	diff=10,0;high=13,0;low=3,0	diff=7,0;high=13,0;low=6,0	diff=10,0;high=14,0;low=4,0	diff=7,0;high=12,0;low=5,0	diff=6,0;high=11,0;low=5,0	diff=6,0;high=11,0;low=5,0
NC_017022.1	terminator_00739	2704647	2704676	+	gene_converged	EFAU004_RS13260	NC_017022.1_transcript2275	TRUE	diff=4,0;high=7,0;low=3,0	diff=6,0;high=10,0;low=4,0	diff=4,0;high=7,0;low=3,0	diff=2,0;high=2,0;low=0,0	diff=3,8;high=6,0;low=2,2	diff=4,0;high=4,0;low=0,0
NC_017022.1	terminator_00740	2704691	2704720	-	TransTermHP	EFAU004_RS13265	NC_017022.1_transcript2276	TRUE	diff=11,0;high=16,0;low=5,0	diff=6,0;high=9,0;low=3,0	diff=8,0;high=12,0;low=4,0	diff=12,0;high=22,0;low=10,0	diff=9,0;high=15,0;low=6,0	diff=11,0;high=20,0;low=9,0
NC_017022.1	terminator_00741	2706644	2706682	-	TransTermHP	EFAU004_RS13270	NC_017022.1_transcript2279	TRUE	diff=10,0;high=19,0;low=9,0	diff=15,0;high=24,0;low=9,0	diff=18,0;high=35,0;low=17,0	diff=11,0;high=21,0;low=10,0	diff=22,0;high=38,0;low=16,0	diff=21,0;high=37,0;low=16,0
NC_017022.1	terminator_00742	2707840	2707853	-	TransTermHP	EFAU004_RS13275	NC_017022.1_transcript2280	TRUE	Not_detect	diff=8,0;high=14,0;low=6,0	Not_detect	diff=45,0;high=48,0;low=3,0	diff=41,0;high=48,0;low=7,0	diff=52,0;high=54,0;low=2,0
NC_017022.1	terminator_00743	2709159	2709204	-	TransTermHP	EFAU004_RS13280	NC_017022.1_transcript2281	TRUE	diff=9,0;high=16,0;low=7,0	diff=4,0;high=7,0;low=3,0	diff=9,0;high=16,0;low=7,0	diff=27,0;high=51,0;low=24,0	diff=15,0;high=26,0;low=11,0	diff=14,0;high=26,0;low=12,0
NC_017022.1	terminator_00744	2710048	2710081	-	TransTermHP	EFAU004_RS13285	NC_017022.1_transcript2282	TRUE	diff=21,0;high=38,0;low=17,0	diff=34,0;high=66,0;low=32,0	diff=30,0;high=55,0;low=25,0	diff=17,0;high=32,0;low=15,0	diff=22,0;high=43,0;low=21,0	diff=24,0;high=44,0;low=20,0
NC_017022.1	terminator_00745	2715055	2715108	-	gene_converged;TransTermHP	EFAU004_RS13305	NC_017022.1_transcript2284	FALSE	Not_detect	Not_detect	Not_detect	Not_detect	Not_detect	Not_detect
NC_017022.1	terminator_00746	2715060	2715102	+	gene_converged;TransTermHP	EFAU004_RS13300	NC_017022.1_transcript2283	TRUE	diff=13,0;high=25,0;low=12,0	diff=12,0;high=20,0;low=8,0	diff=11,0;high=20,0;low=9,0	diff=7,0;high=13,0;low=6,0	diff=7,0;high=12,0;low=5,0	diff=7,0;high=13,0;low=6,0
NC_017022.1	terminator_00747	2715611	2715644	-	TransTermHP	EFAU004_RS13310	NC_017022.1_transcript2285	TRUE	diff=19,0;high=34,0;low=15,0	diff=21,0;high=39,0;low=18,0	diff=30,0;high=56,0;low=26,0	diff=37,0;high=72,0;low=35,0	diff=49,0;high=94,0;low=45,0	diff=56,0;high=103,0;low=47,0
NC_017022.1	terminator_00748	2720448	2720482	-	TransTermHP	EFAU004_RS13345	NC_017022.1_transcript2288	TRUE	diff=91,0;high=163,0;low=72,0	diff=66,0;high=125,0;low=59,0	diff=79,0;high=133,0;low=54,0	diff=49,0;high=97,0;low=48,0	diff=29,0;high=54,0;low=25,0	diff=46,0;high=81,0;low=35,0
NC_017022.1	terminator_00749	2722295	2722325	-	TransTermHP	EFAU004_RS13350	NC_017022.1_transcript2289	TRUE	diff=41,0;high=50,0;low=9,0	diff=44,0;high=50,0;low=6,0	diff=41,0;high=54,0;low=13,0	diff=38,0;high=49,0;low=11,0	diff=32,0;high=44,0;low=12,0	diff=34,8;high=44,0;low=9,2
NC_017022.1	terminator_00750	2729534	2729585	+	TransTermHP	EFAU004_RS13375	NC_017022.1_transcript2292	TRUE	Not_detect	diff=29,0;high=57,0;low=28,0	diff=35,0;high=66,0;low=31,0	diff=18,0;high=35,0;low=17,0	diff=26,0;high=49,0;low=23,0	diff=18,0;high=32,0;low=14,0
NC_017022.1	terminator_00751	2730031	2730068	+	gene_converged;TransTermHP	transcript_02292,EFAU004_RS13380	NC_017022.1_transcript2292	TRUE	diff=5,0;high=8,0;low=3,0	diff=6,0;high=11,0;low=5,0	diff=7,0;high=13,0;low=6,0	diff=27,0;high=51,0;low=24,0	diff=24,0;high=43,0;low=19,0	diff=17,0;high=30,0;low=13,0
NC_017022.1	terminator_00752	2740801	2740855	+	TransTermHP	EFAU004_RS13435	NC_017022.1_transcript2306	TRUE	diff=54,0;high=72,0;low=18,0	diff=68,0;high=81,0;low=13,0	diff=98,0;high=138,0;low=40,0	diff=15127,0;high=15149,0;low=22,0	diff=10507,0;high=10528,0;low=21,0	diff=18472,0;high=18491,0;low=19,0
NC_017022.1	terminator_00753	2745419	2745458	+	TransTermHP	EFAU004_RS13455	NC_017022.1_transcript2308	FALSE	Not_detect	Not_detect	Not_detect	Not_detect	Not_detect	Not_detect
NC_017022.1	terminator_00754	2745621	2745657	-	gene_converged	transcript_02309,EFAU004_RS13460	NC_017022.1_transcript2309	TRUE	diff=42,0;high=59,0;low=17,0	diff=32,0;high=59,0;low=27,0	diff=39,0;high=74,0;low=35,0	diff=2590,5;high=2909,5;low=319,0	diff=1996,0;high=2274,0;low=278,0	diff=2842,5;high=3288,5;low=446,0
NC_017022.1	terminator_00755	2752832	2752847	-	TransTermHP	EFAU004_RS15805	NC_017022.1_transcript2317	TRUE	diff=56,0;high=62,0;low=6,0	diff=47,0;high=62,0;low=15,0	diff=33,0;high=44,0;low=11,0	diff=73,0;high=97,0;low=24,0	diff=88,0;high=96,0;low=8,0	diff=38,0;high=56,0;low=18,0
NC_017022.1	terminator_00756	2758564	2758587	-	gene_converged	EFAU004_RS13520	NC_017022.1_transcript2324	TRUE	diff=15,0;high=17,0;low=2,0	diff=15,0;high=17,0;low=2,0	diff=34,0;high=41,0;low=7,0	diff=653,0;high=656,0;low=3,0	diff=429,0;high=431,0;low=2,0	diff=769,0;high=774,0;low=5,0
NC_017022.1	terminator_00757	2766482	2766539	+	gene_converged;TransTermHP	EFAU004_RS13560	NC_017022.1_transcript2336	TRUE	diff=14,0;high=19,0;low=5,0	diff=19,0;high=25,0;low=6,0	diff=33,0;high=46,0;low=13,0	diff=1877,0;high=2489,0;low=612,0	diff=1508,0;high=2096,0;low=588,0	diff=2366,0;high=3230,0;low=864,0
NC_017022.1	terminator_00758	2782622	2782647	-	TransTermHP	EFAU004_RS13660	NC_017022.1_transcript2360	FALSE	Not_detect	Not_detect	Not_detect	Not_detect	Not_detect	Not_detect
NC_017022.1	terminator_00759	2783759	2783787	+	gene_converged	transcript_02363	NC_017022.1_transcript2362	TRUE	diff=8,0;high=10,0;low=2,0	diff=7,0;high=10,0;low=3,0	diff=15,0;high=19,0;low=4,0	diff=476,0;high=488,0;low=12,0	diff=432,0;high=440,0;low=8,0	diff=497,0;high=503,0;low=6,0
NC_017022.1	terminator_00760	2793514	2793536	+	TransTermHP	EFAU004_RS13710	NC_017022.1_transcript2374	TRUE	diff=6,0;high=11,0;low=5,0	diff=10,0;high=19,0;low=9,0	diff=6,0;high=11,0;low=5,0	diff=7,0;high=13,0;low=6,0	diff=7,0;high=12,0;low=5,0	diff=5,5;high=10,5;low=5,0
NC_017022.1	terminator_00761	2796949	2796966	+	TransTermHP	EFAU004_RS15840	NA	FALSE	Not_detect	Not_detect	Not_detect	Not_detect	Not_detect	Not_detect
NC_017022.1	terminator_00762	2814590	2814612	-	TransTermHP	EFAU004_RS15860	NC_017022.1_transcript2389	TRUE	Not_detect	diff=4,0;high=6,0;low=2,0	diff=3,0;high=4,0;low=1,0	diff=20,0;high=20,0;low=0,0	diff=15,0;high=19,0;low=4,0	diff=16,0;high=18,0;low=2,0
NC_017022.1	terminator_00763	2824749	2824774	-	gene_converged	transcript_02399	NC_017022.1_transcript2399	TRUE	diff=49,0;high=78,0;low=29,0	diff=44,0;high=80,0;low=36,0	diff=62,0;high=107,0;low=45,0	diff=829,0;high=1578,0;low=749,0	diff=635,0;high=1228,0;low=593,0	diff=790,0;high=1578,0;low=788,0
NC_017022.1	terminator_00764	2843139	2843164	-	TransTermHP	EFAU004_RS13940	NC_017022.1_transcript2413	TRUE	diff=4,0;high=7,0;low=3,0	diff=4,0;high=7,0;low=3,0	diff=5,0;high=8,0;low=3,0	diff=5,0;high=9,0;low=4,0	diff=9,0;high=14,0;low=5,0	diff=3,0;high=4,0;low=1,0
NC_017022.1	terminator_00765	2846824	2846850	+	TransTermHP	EFAU004_RS13960	NC_017022.1_transcript2417	TRUE	diff=115,0;high=169,0;low=54,0	diff=120,0;high=230,0;low=110,0	diff=151,0;high=201,0;low=50,0	diff=59,0;high=104,0;low=45,0	diff=61,0;high=118,0;low=57,0	diff=58,0;high=106,0;low=48,0
NC_017022.1	terminator_00766	2849548	2849604	+	TransTermHP	EFAU004_RS13975	NC_017022.1_transcript2419	TRUE	diff=18,0;high=35,0;low=17,0	diff=19,0;high=31,0;low=12,0	diff=17,0;high=33,0;low=16,0	diff=81,0;high=104,0;low=23,0	diff=34,0;high=61,0;low=27,0	diff=60,0;high=79,0;low=19,0
NC_017022.1	terminator_00767	2874697	2874708	-	TransTermHP	EFAU004_RS14085	NC_017022.1_transcript2426	TRUE	diff=3,0;high=4,0;low=1,0	diff=3,0;high=5,0;low=2,0	Not_detect	diff=18,0;high=25,0;low=7,0	diff=20,0;high=34,0;low=14,0	diff=17,0;high=22,0;low=5,0
NC_017022.1	terminator_00768	2880127	2880140	+	TransTermHP	EFAU004_RS15900	NC_017022.1_transcript2432	TRUE	Not_detect	diff=3,0;high=4,0;low=1,0	diff=4,0;high=5,0;low=1,0	diff=63,0;high=65,0;low=2,0	diff=66,0;high=69,0;low=3,0	diff=53,0;high=54,0;low=1,0
NC_017022.1	terminator_00769	2881391	2881418	-	TransTermHP	EFAU004_RS14115	NC_017022.1_transcript2433	TRUE	diff=47,0;high=90,0;low=43,0	diff=60,0;high=112,0;low=52,0	diff=86,0;high=162,0;low=76,0	diff=55,0;high=103,0;low=48,0	diff=58,0;high=112,0;low=54,0	diff=60,0;high=112,0;low=52,0
NC_017022.1	terminator_00770	2882507	2882537	-	TransTermHP	EFAU004_RS14125	NC_017022.1_transcript2434	TRUE	diff=109,5;high=192,5;low=83,0	diff=117,47549019600001;high=222,475490196;low=105,0	diff=113,283333333;high=225,283333333;low=112,0	diff=207,02499999999998;high=412,025;low=205,0	diff=187,3125;high=372,3125;low=185,0	diff=180,3125;high=343,3125;low=163,0
NC_017022.1	terminator_00771	2885705	2885741	-	gene_converged;TransTermHP	EFAU004_RS14140	NC_017022.1_transcript2437	TRUE	diff=3,0;high=4,0;low=1,0	diff=3,0;high=4,0;low=1,0	diff=3,0;high=5,0;low=2,0	diff=27,0;high=38,0;low=11,0	diff=17,0;high=30,0;low=13,0	diff=29,0;high=45,0;low=16,0
NC_017022.1	terminator_00772	2899553	2899600	+	gene_converged;TransTermHP	EFAU004_RS14195	NC_017022.1_transcript2443	FALSE	Not_detect	Not_detect	Not_detect	Not_detect	Not_detect	Not_detect
NC_017022.1	terminator_00773	2900083	2900135	-	gene_converged;TransTermHP	EFAU004_RS14200	NC_017022.1_transcript2444	TRUE	diff=8,0;high=14,0;low=6,0	diff=9,0;high=15,0;low=6,0	diff=10,0;high=14,0;low=4,0	diff=4,0;high=7,0;low=3,0	diff=4,0;high=7,0;low=3,0	diff=6,0;high=9,0;low=3,0
NC_017022.1	terminator_00774	2903823	2903855	-	TransTermHP	EFAU004_RS14205	NC_017022.1_transcript2444	TRUE	diff=81,0;high=159,0;low=78,0	diff=77,0;high=145,0;low=68,0	diff=90,0;high=174,0;low=84,0	diff=43,0;high=84,0;low=41,0	diff=47,0;high=90,0;low=43,0	diff=45,0;high=89,0;low=44,0
NC_017022.1	terminator_00775	2912291	2912344	-	gene_converged;TransTermHP	EFAU004_RS14230	NC_017022.1_transcript2451	TRUE	diff=9,0;high=16,0;low=7,0	diff=13,0;high=25,0;low=12,0	diff=10,0;high=16,0;low=6,0	diff=25,0;high=42,0;low=17,0	diff=15,0;high=26,0;low=11,0	diff=14,0;high=27,0;low=13,0
NC_017022.1	terminator_00776	2915161	2915195	+	TransTermHP	EFAU004_RS14235	NC_017022.1_transcript2453	FALSE	Not_detect	Not_detect	Not_detect	Not_detect	Not_detect	Not_detect
NC_017022.1	terminator_00777	2917690	2917717	-	TransTermHP	EFAU004_RS14255	NC_017022.1_transcript2460	TRUE	diff=6,0;high=8,0;low=2,0	diff=11,0;high=19,0;low=8,0	diff=6,0;high=8,0;low=2,0	diff=7,0;high=12,0;low=5,0	diff=9,0;high=16,0;low=7,0	diff=11,0;high=17,0;low=6,0
NC_017022.1	terminator_00778	2920961	2920996	+	TransTermHP	EFAU004_RS14260	NC_017022.1_transcript2461	TRUE	Not_detect	diff=5,0;high=8,0;low=3,0	Not_detect	diff=3,0;high=5,0;low=2,0	diff=3,0;high=5,0;low=2,0	diff=7,0;high=10,0;low=3,0
NC_017022.1	terminator_00779	2923738	2923754	+	gene_converged	EFAU004_RS14270	NC_017022.1_transcript2464	TRUE	Not_detect	Not_detect	Not_detect	diff=40,0;high=40,0;low=0,0	diff=31,0;high=31,0;low=0,0	diff=57,0;high=57,0;low=0,0
NC_017022.1	terminator_00780	2927829	2927859	-	TransTermHP	EFAU004_RS14290	NC_017022.1_transcript2469	TRUE	diff=21,0;high=37,0;low=16,0	diff=16,0;high=30,0;low=14,0	diff=9,0;high=16,0;low=7,0	diff=30,0;high=56,0;low=26,0	diff=23,0;high=42,0;low=19,0	diff=13,0;high=24,0;low=11,0
NC_017022.1	terminator_00781	2930984	2931004	-	TransTermHP	EFAU004_RS14300	NC_017022.1_transcript2471	TRUE	diff=1732,5;high=1961,5;low=229,0	diff=2277,5;high=2586,5;low=309,0	diff=2419,0;high=2763,0;low=344,0	diff=387,0;high=770,5;low=383,5	diff=358,0;high=712,5;low=354,5	diff=524,5;high=952,0;low=427,5
NC_017022.1	terminator_00782	2931149	2931163	-	TransTermHP	EFAU004_RS14305	NC_017022.1_transcript2471	TRUE	diff=221,0;high=377,0;low=156,0	diff=286,5;high=556,0;low=269,5	diff=490,0;high=881,0;low=391,0	diff=657,0;high=809,0;low=152,0	diff=485,0;high=600,0;low=115,0	diff=968,0;high=1244,0;low=276,0
NC_017022.1	terminator_00783	2931246	2931258	-	TransTermHP	EFAU004_RS14310	NC_017022.1_transcript2471	TRUE	diff=283,5;high=343,5;low=60,0	diff=376,5;high=448,5;low=72,0	diff=355,5;high=683,0;low=327,5	diff=366,5;high=409,0;low=42,5	diff=312,5;high=374,0;low=61,5	diff=481,5;high=541,0;low=59,5
NC_017022.1	terminator_00784	2931684	2931699	-	TransTermHP	EFAU004_RS14335	NC_017022.1_transcript2471	TRUE	diff=9219,0;high=10294,0;low=1075,0	diff=11343,0;high=12679,0;low=1336,0	diff=12424,5;high=14107,0;low=1682,5	diff=15788,0;high=19888,0;low=4100,0	diff=9123,0;high=11573,5;low=2450,5	diff=21045,0;high=27351,5;low=6306,5
NC_017022.1	terminator_00785	2931741	2931757	-	TransTermHP	EFAU004_RS14340	NC_017022.1_transcript2471	TRUE	diff=3210,0;high=3704,5;low=494,5	diff=4123,5;high=4714,5;low=591,0	diff=4800,5;high=5626,5;low=826,0	diff=736,0;high=954,5;low=218,5	diff=819,5;high=1064,5;low=245,0	diff=889,0;high=1137,5;low=248,5
NC_017022.1	terminator_00786	2935273	2935300	-	gene_converged	EFAU004_RS14355	NC_017022.1_transcript2471	TRUE	diff=34,7090909091;high=54,9727272727;low=20,2636363636	diff=37,14545454539999;high=72,9818181818;low=35,8363636364	diff=33,973262032099996;high=58,6484848485;low=24,6752228164	diff=86,7236185381;high=158,174242424;low=71,4506238859	diff=64,2475044559;high=127,992424242;low=63,7449197861	diff=52,3780748663;high=99,303030303;low=46,9249554367
NC_017022.1	terminator_00787	2939824	2939860	+	TransTermHP	EFAU004_RS14365	NC_017022.1_transcript2473	TRUE	diff=22,0;high=41,0;low=19,0	diff=11,0;high=20,0;low=9,0	diff=46,0;high=72,0;low=26,0	Not_detect	diff=14,0;high=23,0;low=9,0	diff=9,0;high=17,0;low=8,0
NC_017022.1	terminator_00788	2941327	2941364	+	gene_converged	EFAU004_RS14370	NC_017022.1_transcript2477	TRUE	diff=12,9655172414;high=25,0;low=12,0344827586	Not_detect	diff=21,0;high=41,0;low=20,0	Not_detect	diff=12,0;high=22,0;low=10,0	diff=7,0;high=13,0;low=6,0
NC_017022.1	terminator_00789	2941667	2941694	-	gene_converged	EFAU004_RS14375	NC_017022.1_transcript2479	TRUE	diff=31,0;high=60,0;low=29,0	diff=30,0;high=57,0;low=27,0	diff=30,0;high=56,0;low=26,0	diff=13,0;high=25,0;low=12,0	diff=18,7571428571;high=29,0;low=10,2428571429	diff=7,85714285714;high=15,0;low=7,14285714286
NC_017022.1	terminator_00790	2943670	2943699	-	TransTermHP	EFAU004_RS14380	NC_017022.1_transcript2480	TRUE	diff=18,0;high=30,0;low=12,0	diff=13,0;high=23,0;low=10,0	diff=25,0;high=38,0;low=13,0	diff=7,0;high=13,0;low=6,0	diff=11,0;high=21,0;low=10,0	diff=10,0;high=17,0;low=7,0
NC_017022.1	terminator_00791	2948342	2948391	-	TransTermHP	EFAU004_RS14410	NC_017022.1_transcript2482	TRUE	diff=5,0;high=9,0;low=4,0	diff=4,0;high=7,0;low=3,0	diff=6,0;high=11,0;low=5,0	diff=13,0;high=18,0;low=5,0	diff=7,0;high=13,0;low=6,0	diff=6,0;high=9,0;low=3,0
NC_017022.1	terminator_00792	2952413	2952463	-	gene_converged;TransTermHP	EFAU004_RS14425	NC_017022.1_transcript2485	TRUE	diff=137,0;high=151,0;low=14,0	diff=87,0;high=167,0;low=80,0	diff=110,0;high=212,0;low=102,0	diff=577,0;high=950,0;low=373,0	diff=504,0;high=778,0;low=274,0	diff=394,0;high=668,0;low=274,0
NC_017022.1	terminator_00793	2952424	2952455	+	TransTermHP	EFAU004_RS14420	NC_017022.1_transcript2484	FALSE	Not_detect	Not_detect	Not_detect	Not_detect	Not_detect	Not_detect
NC_017022.1	terminator_00794	2954619	2954636	-	TransTermHP	EFAU004_RS14440	NC_017022.1_transcript2487	TRUE	diff=86,0;high=169,0;low=83,0	diff=110,0;high=207,0;low=97,0	diff=115,0;high=221,0;low=106,0	diff=108,0;high=193,0;low=85,0	diff=94,0;high=184,0;low=90,0	diff=102,0;high=198,0;low=96,0
NC_017022.1	terminator_00000	10710	10746	+	TransTermHP	EFAU004_RS00050	NC_017022.1_transcript11	FALSE	Not_detect	Not_detect	Not_detect	Not_detect	Not_detect	Not_detect
NC_017022.1	terminator_00001	11293	11327	+	TransTermHP	EFAU004_RS00060	NA	FALSE	Not_detect	Not_detect	Not_detect	Not_detect	Not_detect	Not_detect
NC_017022.1	terminator_00002	15134	15166	+	TransTermHP	EFAU004_RS00075	NA	FALSE	Not_detect	Not_detect	Not_detect	Not_detect	Not_detect	Not_detect
NC_017022.1	terminator_00003	17271	17283	+	TransTermHP	EFAU004_RS14840	NA	FALSE	Not_detect	Not_detect	Not_detect	Not_detect	Not_detect	Not_detect
NC_017022.1	terminator_00004	18681	18714	-	gene_converged	EFAU004_RS14845	NA	FALSE	Not_detect	Not_detect	Not_detect	Not_detect	Not_detect	Not_detect
NC_017022.1	terminator_00005	18827	18878	+	gene_converged;TransTermHP	EFAU004_RS00085	NA	FALSE	Not_detect	Not_detect	Not_detect	Not_detect	Not_detect	Not_detect
NC_017022.1	terminator_00006	20265	20281	-	TransTermHP	UNK	NA	FALSE	Not_detect	Not_detect	Not_detect	Not_detect	Not_detect	Not_detect
NC_017022.1	terminator_00007	2937198	2937209	+	TransTermHP	UNK	NA	FALSE	Not_detect	Not_detect	Not_detect	Not_detect	Not_detect	Not_detect
NC_017022.1	terminator_00008	23261	23319	-	gene_converged;TransTermHP	EFAU004_RS00110	NA	FALSE	Not_detect	Not_detect	Not_detect	Not_detect	Not_detect	Not_detect
NC_017022.1	terminator_00009	23269	23317	+	TransTermHP	EFAU004_RS00105	NA	FALSE	Not_detect	Not_detect	Not_detect	Not_detect	Not_detect	Not_detect
NC_017022.1	terminator_00010	25756	25812	-	gene_converged;TransTermHP	EFAU004_RS00120	NA	FALSE	Not_detect	Not_detect	Not_detect	Not_detect	Not_detect	Not_detect
NC_017022.1	terminator_00011	28667	28695	-	TransTermHP	EFAU004_RS00130	NA	FALSE	Not_detect	Not_detect	Not_detect	Not_detect	Not_detect	Not_detect
NC_017022.1	terminator_00012	29946	30004	+	gene_converged;TransTermHP	EFAU004_RS00135	NA	FALSE	Not_detect	Not_detect	Not_detect	Not_detect	Not_detect	Not_detect
NC_017022.1	terminator_00013	30404	30471	-	gene_converged	EFAU004_RS00145	NA	FALSE	Not_detect	Not_detect	Not_detect	Not_detect	Not_detect	Not_detect
NC_017022.1	terminator_00014	34223	34249	+	TransTermHP	EFAU004_RS00155	NA	FALSE	Not_detect	Not_detect	Not_detect	Not_detect	Not_detect	Not_detect
NC_017022.1	terminator_00015	36220	36250	+	TransTermHP	EFAU004_RS14860	NA	FALSE	Not_detect	Not_detect	Not_detect	Not_detect	Not_detect	Not_detect
NC_017022.1	terminator_00016	36799	36819	-	gene_converged	EFAU004_RS00175	NA	FALSE	Not_detect	Not_detect	Not_detect	Not_detect	Not_detect	Not_detect
NC_017022.1	terminator_00017	36993	37025	+	gene_converged	EFAU004_RS00170	NA	FALSE	Not_detect	Not_detect	Not_detect	Not_detect	Not_detect	Not_detect
NC_017022.1	terminator_00018	44144	44180	+	TransTermHP	EFAU004_RS00200	NA	FALSE	Not_detect	Not_detect	Not_detect	Not_detect	Not_detect	Not_detect
NC_017022.1	terminator_00019	45975	45985	+	TransTermHP	EFAU004_RS00205	NA	FALSE	Not_detect	Not_detect	Not_detect	Not_detect	Not_detect	Not_detect
NC_017022.1	terminator_00020	54198	54227	+	TransTermHP	EFAU004_RS00245	NA	FALSE	Not_detect	Not_detect	Not_detect	Not_detect	Not_detect	Not_detect
NC_017022.1	terminator_00021	55885	55923	+	gene_converged	EFAU004_RS00255	NA	FALSE	Not_detect	Not_detect	Not_detect	Not_detect	Not_detect	Not_detect
NC_017022.1	terminator_00022	56053	56064	+	TransTermHP	EFAU004_RS00260	NA	FALSE	Not_detect	Not_detect	Not_detect	Not_detect	Not_detect	Not_detect
NC_017022.1	terminator_00023	57457	57471	+	TransTermHP	EFAU004_RS00270	NA	FALSE	Not_detect	Not_detect	Not_detect	Not_detect	Not_detect	Not_detect
NC_017022.1	terminator_00024	65049	65084	+	TransTermHP	EFAU004_RS00300	NA	FALSE	Not_detect	Not_detect	Not_detect	Not_detect	Not_detect	Not_detect
NC_017022.1	terminator_00025	66265	66297	+	TransTermHP	EFAU004_RS00305	NA	FALSE	Not_detect	Not_detect	Not_detect	Not_detect	Not_detect	Not_detect
NC_017022.1	terminator_00026	68644	68694	+	gene_converged;TransTermHP	EFAU004_RS00315	NA	FALSE	Not_detect	Not_detect	Not_detect	Not_detect	Not_detect	Not_detect
NC_017022.1	terminator_00027	70531	70554	-	TransTermHP	EFAU004_RS00330	NA	FALSE	Not_detect	Not_detect	Not_detect	Not_detect	Not_detect	Not_detect
NC_017022.1	terminator_00028	70627	70644	+	TransTermHP	EFAU004_RS00325	NA	FALSE	Not_detect	Not_detect	Not_detect	Not_detect	Not_detect	Not_detect
NC_017022.1	terminator_00029	70898	70939	+	TransTermHP	EFAU004_RS14870	NA	FALSE	Not_detect	Not_detect	Not_detect	Not_detect	Not_detect	Not_detect
NC_017022.1	terminator_00030	72538	72554	+	TransTermHP	EFAU004_RS00340	NA	FALSE	Not_detect	Not_detect	Not_detect	Not_detect	Not_detect	Not_detect
NC_017022.1	terminator_00031	74495	74510	+	TransTermHP	EFAU004_RS00350	NA	FALSE	Not_detect	Not_detect	Not_detect	Not_detect	Not_detect	Not_detect
NC_017022.1	terminator_00032	76087	76097	-	TransTermHP	EFAU004_RS00360	NC_017022.1_transcript89	FALSE	Not_detect	Not_detect	Not_detect	Not_detect	Not_detect	Not_detect
NC_017022.1	terminator_00033	89813	89841	+	TransTermHP	EFAU004_RS00420	NA	FALSE	Not_detect	Not_detect	Not_detect	Not_detect	Not_detect	Not_detect
NC_017022.1	terminator_00034	92870	92892	+	TransTermHP	EFAU004_RS00440	NC_017022.1_transcript105	FALSE	Not_detect	Not_detect	Not_detect	Not_detect	Not_detect	Not_detect
NC_017022.1	terminator_00035	93409	93440	+	TransTermHP	EFAU004_RS00445	NC_017022.1_transcript105	FALSE	Not_detect	Not_detect	Not_detect	Not_detect	Not_detect	Not_detect
NC_017022.1	terminator_00036	95625	95641	+	TransTermHP	EFAU004_RS00450	NC_017022.1_transcript105	FALSE	Not_detect	Not_detect	Not_detect	Not_detect	Not_detect	Not_detect
NC_017022.1	terminator_00037	100140	100150	+	TransTermHP	EFAU004_RS00480	NC_017022.1_transcript106	FALSE	Not_detect	Not_detect	Not_detect	Not_detect	Not_detect	Not_detect
NC_017022.1	terminator_00038	106635	106651	+	TransTermHP	EFAU004_RS00560	NC_017022.1_transcript106	FALSE	Not_detect	Not_detect	Not_detect	Not_detect	Not_detect	Not_detect
NC_017022.1	terminator_00039	109073	109091	+	TransTermHP	EFAU004_RS00575	NC_017022.1_transcript106	FALSE	Not_detect	Not_detect	Not_detect	Not_detect	Not_detect	Not_detect
NC_017022.1	terminator_00040	109225	109238	+	TransTermHP	EFAU004_RS00580	NC_017022.1_transcript106	FALSE	Not_detect	Not_detect	Not_detect	Not_detect	Not_detect	Not_detect
NC_017022.1	terminator_00041	110026	110036	+	TransTermHP	EFAU004_RS00590	NC_017022.1_transcript106	FALSE	Not_detect	Not_detect	Not_detect	Not_detect	Not_detect	Not_detect
NC_017022.1	terminator_00042	115253	115273	-	gene_converged	EFAU004_RS00625	NA	FALSE	Not_detect	Not_detect	Not_detect	Not_detect	Not_detect	Not_detect
NC_017022.1	terminator_00043	115401	115461	+	gene_converged;TransTermHP	EFAU004_RS00620	NA	FALSE	Not_detect	Not_detect	Not_detect	Not_detect	Not_detect	Not_detect
NC_017022.1	terminator_00044	118240	118283	-	gene_converged	EFAU004_RS14880	NA	FALSE	Not_detect	Not_detect	Not_detect	Not_detect	Not_detect	Not_detect
NC_017022.1	terminator_00045	123079	123093	+	TransTermHP	EFAU004_RS00645	NC_017022.1_transcript116	FALSE	Not_detect	Not_detect	Not_detect	Not_detect	Not_detect	Not_detect
NC_017022.1	terminator_00046	128599	128612	+	TransTermHP	EFAU004_RS00675	NC_017022.1_transcript117	FALSE	Not_detect	Not_detect	Not_detect	Not_detect	Not_detect	Not_detect
NC_017022.1	terminator_00047	139338	139396	-	gene_converged;TransTermHP	EFAU004_RS00710	NA	FALSE	Not_detect	Not_detect	Not_detect	Not_detect	Not_detect	Not_detect
NC_017022.1	terminator_00048	143959	143983	+	gene_converged	EFAU004_RS00730	NA	FALSE	Not_detect	Not_detect	Not_detect	Not_detect	Not_detect	Not_detect
NC_017022.1	terminator_00049	144045	144069	-	gene_converged	EFAU004_RS00735	NA	FALSE	Not_detect	Not_detect	Not_detect	Not_detect	Not_detect	Not_detect
NC_017022.1	terminator_00050	144045	144069	-	gene_converged	EFAU004_RS00735	NA	FALSE	Not_detect	Not_detect	Not_detect	Not_detect	Not_detect	Not_detect
NC_017022.1	terminator_00051	149700	149742	+	gene_converged;TransTermHP	EFAU004_RS00755	NA	FALSE	Not_detect	Not_detect	Not_detect	Not_detect	Not_detect	Not_detect
NC_017022.1	terminator_00052	150600	150622	-	gene_converged	transcript_00133	NC_017022.1_transcript133	FALSE	Not_detect	Not_detect	Not_detect	Not_detect	Not_detect	Not_detect
NC_017022.1	terminator_00053	150909	150925	+	TransTermHP	EFAU004_RS00760	NA	FALSE	Not_detect	Not_detect	Not_detect	Not_detect	Not_detect	Not_detect
NC_017022.1	terminator_00054	154266	154278	+	TransTermHP	EFAU004_RS00780	NA	FALSE	Not_detect	Not_detect	Not_detect	Not_detect	Not_detect	Not_detect
NC_017022.1	terminator_00055	157272	157286	+	TransTermHP	EFAU004_RS00800	NA	FALSE	Not_detect	Not_detect	Not_detect	Not_detect	Not_detect	Not_detect
NC_017022.1	terminator_00056	160146	160158	+	TransTermHP	EFAU004_RS00815	NC_017022.1_transcript148	FALSE	Not_detect	Not_detect	Not_detect	Not_detect	Not_detect	Not_detect
NC_017022.1	terminator_00057	163242	163253	+	TransTermHP	EFAU004_RS00835	NC_017022.1_transcript152	FALSE	Not_detect	Not_detect	Not_detect	Not_detect	Not_detect	Not_detect
NC_017022.1	terminator_00058	164390	164416	-	TransTermHP	EFAU004_RS14890	NA	FALSE	Not_detect	Not_detect	Not_detect	Not_detect	Not_detect	Not_detect
NC_017022.1	terminator_00059	164955	164987	+	TransTermHP	EFAU004_RS00845	NA	FALSE	Not_detect	Not_detect	Not_detect	Not_detect	Not_detect	Not_detect
NC_017022.1	terminator_00060	171636	171696	-	gene_converged;TransTermHP	EFAU004_RS00875	NA	FALSE	Not_detect	Not_detect	Not_detect	Not_detect	Not_detect	Not_detect
NC_017022.1	terminator_00061	178141	178151	+	TransTermHP	EFAU004_RS00905	NC_017022.1_transcript160	FALSE	Not_detect	Not_detect	Not_detect	Not_detect	Not_detect	Not_detect
NC_017022.1	terminator_00062	180347	180393	-	gene_converged;TransTermHP	EFAU004_RS00920	NA	FALSE	Not_detect	Not_detect	Not_detect	Not_detect	Not_detect	Not_detect
NC_017022.1	terminator_00063	182698	182727	+	TransTermHP	EFAU004_RS00925	NA	FALSE	Not_detect	Not_detect	Not_detect	Not_detect	Not_detect	Not_detect
NC_017022.1	terminator_00064	187150	187182	-	TransTermHP	EFAU004_RS00950	NA	FALSE	Not_detect	Not_detect	Not_detect	Not_detect	Not_detect	Not_detect
NC_017022.1	terminator_00065	189651	189667	-	TransTermHP	EFAU004_RS14905	NA	FALSE	Not_detect	Not_detect	Not_detect	Not_detect	Not_detect	Not_detect
NC_017022.1	terminator_00066	189926	189952	+	TransTermHP	EFAU004_RS00965	NA	FALSE	Not_detect	Not_detect	Not_detect	Not_detect	Not_detect	Not_detect
NC_017022.1	terminator_00067	193556	193587	+	gene_converged	EFAU004_RS00980	NA	FALSE	Not_detect	Not_detect	Not_detect	Not_detect	Not_detect	Not_detect
NC_017022.1	terminator_00068	196426	196455	+	TransTermHP	EFAU004_RS00990	NA	FALSE	Not_detect	Not_detect	Not_detect	Not_detect	Not_detect	Not_detect
NC_017022.1	terminator_00069	197843	197883	-	gene_converged;TransTermHP	EFAU004_RS01000	NA	FALSE	Not_detect	Not_detect	Not_detect	Not_detect	Not_detect	Not_detect
NC_017022.1	terminator_00070	208453	208541	+	gene_converged;TransTermHP	EFAU004_RS01050	NA	FALSE	Not_detect	Not_detect	Not_detect	Not_detect	Not_detect	Not_detect
NC_017022.1	terminator_00071	208456	208510	-	gene_converged;TransTermHP	EFAU004_RS01055	NA	FALSE	Not_detect	Not_detect	Not_detect	Not_detect	Not_detect	Not_detect
NC_017022.1	terminator_00072	217084	217134	-	TransTermHP	EFAU004_RS01090	NA	FALSE	Not_detect	Not_detect	Not_detect	Not_detect	Not_detect	Not_detect
NC_017022.1	terminator_00073	217497	217518	+	TransTermHP	EFAU004_RS14920	NA	FALSE	Not_detect	Not_detect	Not_detect	Not_detect	Not_detect	Not_detect
NC_017022.1	terminator_00074	221667	221680	+	TransTermHP	EFAU004_RS01100	NC_017022.1_transcript212	FALSE	Not_detect	Not_detect	Not_detect	Not_detect	Not_detect	Not_detect
NC_017022.1	terminator_00075	222048	222076	+	TransTermHP	EFAU004_RS14925	NC_017022.1_transcript213	FALSE	Not_detect	Not_detect	Not_detect	Not_detect	Not_detect	Not_detect
NC_017022.1	terminator_00076	224047	224104	-	gene_converged;TransTermHP	EFAU004_RS01110	NA	FALSE	Not_detect	Not_detect	Not_detect	Not_detect	Not_detect	Not_detect
NC_017022.1	terminator_00077	225405	225427	+	TransTermHP	EFAU004_RS01120	NA	FALSE	Not_detect	Not_detect	Not_detect	Not_detect	Not_detect	Not_detect
NC_017022.1	terminator_00078	226460	226484	-	gene_converged	EFAU004_RS01130	NA	FALSE	Not_detect	Not_detect	Not_detect	Not_detect	Not_detect	Not_detect
NC_017022.1	terminator_00079	226542	226582	+	TransTermHP	EFAU004_RS01125	NA	FALSE	Not_detect	Not_detect	Not_detect	Not_detect	Not_detect	Not_detect
NC_017022.1	terminator_00080	234523	234568	+	gene_converged;TransTermHP	EFAU004_RS01155	NA	FALSE	Not_detect	Not_detect	Not_detect	Not_detect	Not_detect	Not_detect
NC_017022.1	terminator_00081	236775	236790	+	TransTermHP	EFAU004_RS01165	NC_017022.1_transcript228	FALSE	Not_detect	Not_detect	Not_detect	Not_detect	Not_detect	Not_detect
NC_017022.1	terminator_00082	237211	237238	-	TransTermHP	EFAU004_RS14935	NA	FALSE	Not_detect	Not_detect	Not_detect	Not_detect	Not_detect	Not_detect
NC_017022.1	terminator_00083	240134	240163	+	TransTermHP	EFAU004_RS01175	NA	FALSE	Not_detect	Not_detect	Not_detect	Not_detect	Not_detect	Not_detect
NC_017022.1	terminator_00084	245138	245171	+	TransTermHP	EFAU004_RS01200	NA	FALSE	Not_detect	Not_detect	Not_detect	Not_detect	Not_detect	Not_detect
NC_017022.1	terminator_00085	246178	246240	+	gene_converged;TransTermHP	EFAU004_RS01205	NC_017022.1_transcript233	FALSE	Not_detect	Not_detect	Not_detect	Not_detect	Not_detect	Not_detect
NC_017022.1	terminator_00086	246183	246230	-	TransTermHP	EFAU004_RS01210	NA	FALSE	Not_detect	Not_detect	Not_detect	Not_detect	Not_detect	Not_detect
NC_017022.1	terminator_00087	251199	251230	+	TransTermHP	EFAU004_RS01230	NA	FALSE	Not_detect	Not_detect	Not_detect	Not_detect	Not_detect	Not_detect
NC_017022.1	terminator_00088	256880	256943	-	gene_converged;TransTermHP	EFAU004_RS01265	NA	FALSE	Not_detect	Not_detect	Not_detect	Not_detect	Not_detect	Not_detect
NC_017022.1	terminator_00089	256982	257022	+	TransTermHP	EFAU004_RS01260	NA	FALSE	Not_detect	Not_detect	Not_detect	Not_detect	Not_detect	Not_detect
NC_017022.1	terminator_00090	262786	262799	-	TransTermHP	EFAU004_RS01295	NA	FALSE	Not_detect	Not_detect	Not_detect	Not_detect	Not_detect	Not_detect
NC_017022.1	terminator_00091	264509	264538	+	TransTermHP	EFAU004_RS01300	NC_017022.1_transcript245	FALSE	Not_detect	Not_detect	Not_detect	Not_detect	Not_detect	Not_detect
NC_017022.1	terminator_00092	269715	269756	-	gene_converged	EFAU004_RS01330	NA	FALSE	Not_detect	Not_detect	Not_detect	Not_detect	Not_detect	Not_detect
NC_017022.1	terminator_00093	269855	269883	+	gene_converged	EFAU004_RS01325	NA	FALSE	Not_detect	Not_detect	Not_detect	Not_detect	Not_detect	Not_detect
NC_017022.1	terminator_00094	280922	280964	+	gene_converged	EFAU004_RS01390	NA	FALSE	Not_detect	Not_detect	Not_detect	Not_detect	Not_detect	Not_detect
NC_017022.1	terminator_00095	281484	281502	+	TransTermHP	EFAU004_RS01395	NA	FALSE	Not_detect	Not_detect	Not_detect	Not_detect	Not_detect	Not_detect
NC_017022.1	terminator_00096	282461	282477	+	TransTermHP	EFAU004_RS01400	NA	FALSE	Not_detect	Not_detect	Not_detect	Not_detect	Not_detect	Not_detect
NC_017022.1	terminator_00097	284647	284679	+	TransTermHP	EFAU004_RS01410	NA	FALSE	Not_detect	Not_detect	Not_detect	Not_detect	Not_detect	Not_detect
NC_017022.1	terminator_00098	285613	285630	+	TransTermHP	EFAU004_RS01415	NC_017022.1_transcript266	FALSE	Not_detect	Not_detect	Not_detect	Not_detect	Not_detect	Not_detect
NC_017022.1	terminator_00099	286653	286705	+	gene_converged;TransTermHP	EFAU004_RS01420	NA	FALSE	Not_detect	Not_detect	Not_detect	Not_detect	Not_detect	Not_detect
NC_017022.1	terminator_00100	292139	292167	-	gene_converged	transcript_00294,EFAU004_RS01450	NC_017022.1_transcript294	FALSE	Not_detect	Not_detect	Not_detect	Not_detect	Not_detect	Not_detect
NC_017022.1	terminator_00101	295140	295154	-	TransTermHP	EFAU004_RS01465	NA	FALSE	Not_detect	Not_detect	Not_detect	Not_detect	Not_detect	Not_detect
NC_017022.1	terminator_00102	298747	298762	-	TransTermHP	EFAU004_RS01490	NA	FALSE	Not_detect	Not_detect	Not_detect	Not_detect	Not_detect	Not_detect
NC_017022.1	terminator_00103	301245	301260	+	TransTermHP	EFAU004_RS01505	NA	FALSE	Not_detect	Not_detect	Not_detect	Not_detect	Not_detect	Not_detect
NC_017022.1	terminator_00104	304849	304897	-	gene_converged;TransTermHP	EFAU004_RS01535	NA	FALSE	Not_detect	Not_detect	Not_detect	Not_detect	Not_detect	Not_detect
NC_017022.1	terminator_00105	304855	304893	+	TransTermHP	EFAU004_RS01530	NA	FALSE	Not_detect	Not_detect	Not_detect	Not_detect	Not_detect	Not_detect
NC_017022.1	terminator_00106	311163	311233	-	gene_converged;TransTermHP	EFAU004_RS01560	NA	FALSE	Not_detect	Not_detect	Not_detect	Not_detect	Not_detect	Not_detect
NC_017022.1	terminator_00107	311176	311222	+	gene_converged;TransTermHP	EFAU004_RS01555	NA	FALSE	Not_detect	Not_detect	Not_detect	Not_detect	Not_detect	Not_detect
NC_017022.1	terminator_00108	313655	313667	+	TransTermHP	EFAU004_RS01565	NA	FALSE	Not_detect	Not_detect	Not_detect	Not_detect	Not_detect	Not_detect
NC_017022.1	terminator_00109	317703	317726	+	TransTermHP	EFAU004_RS01580	NA	FALSE	Not_detect	Not_detect	Not_detect	Not_detect	Not_detect	Not_detect
NC_017022.1	terminator_00110	319867	319892	+	TransTermHP	EFAU004_RS01590	NA	FALSE	Not_detect	Not_detect	Not_detect	Not_detect	Not_detect	Not_detect
NC_017022.1	terminator_00111	321010	321035	+	gene_converged	EFAU004_RS01595	NA	FALSE	Not_detect	Not_detect	Not_detect	Not_detect	Not_detect	Not_detect
NC_017022.1	terminator_00112	326049	326072	+	TransTermHP	EFAU004_RS01620	NA	FALSE	Not_detect	Not_detect	Not_detect	Not_detect	Not_detect	Not_detect
NC_017022.1	terminator_00113	326637	326668	+	TransTermHP	EFAU004_RS01625	NA	FALSE	Not_detect	Not_detect	Not_detect	Not_detect	Not_detect	Not_detect
NC_017022.1	terminator_00114	328491	328501	-	TransTermHP	EFAU004_RS01640	NA	FALSE	Not_detect	Not_detect	Not_detect	Not_detect	Not_detect	Not_detect
NC_017022.1	terminator_00115	330503	330529	-	gene_converged	EFAU004_RS01650	NA	FALSE	Not_detect	Not_detect	Not_detect	Not_detect	Not_detect	Not_detect
NC_017022.1	terminator_00116	332014	332063	-	gene_converged;TransTermHP	EFAU004_RS01670	NA	FALSE	Not_detect	Not_detect	Not_detect	Not_detect	Not_detect	Not_detect
NC_017022.1	terminator_00117	335951	335995	+	TransTermHP	EFAU004_RS01675	NA	FALSE	Not_detect	Not_detect	Not_detect	Not_detect	Not_detect	Not_detect
NC_017022.1	terminator_00118	341510	341535	-	TransTermHP	EFAU004_RS01695	NA	FALSE	Not_detect	Not_detect	Not_detect	Not_detect	Not_detect	Not_detect
NC_017022.1	terminator_00119	341839	341896	+	gene_converged	EFAU004_RS01690	NA	FALSE	Not_detect	Not_detect	Not_detect	Not_detect	Not_detect	Not_detect
NC_017022.1	terminator_00120	343828	343873	+	gene_converged;TransTermHP	EFAU004_RS01705	NA	FALSE	Not_detect	Not_detect	Not_detect	Not_detect	Not_detect	Not_detect
NC_017022.1	terminator_00121	343830	343871	-	gene_converged;TransTermHP	EFAU004_RS01710	NA	FALSE	Not_detect	Not_detect	Not_detect	Not_detect	Not_detect	Not_detect
NC_017022.1	terminator_00122	347418	347442	+	TransTermHP	EFAU004_RS01720	NA	FALSE	Not_detect	Not_detect	Not_detect	Not_detect	Not_detect	Not_detect
NC_017022.1	terminator_00123	362037	362051	+	TransTermHP	EFAU004_RS01800	NA	FALSE	Not_detect	Not_detect	Not_detect	Not_detect	Not_detect	Not_detect
NC_017022.1	terminator_00124	362934	362957	+	TransTermHP	EFAU004_RS01810	NA	FALSE	Not_detect	Not_detect	Not_detect	Not_detect	Not_detect	Not_detect
NC_017022.1	terminator_00125	368032	368062	+	TransTermHP	EFAU004_RS01825	NA	FALSE	Not_detect	Not_detect	Not_detect	Not_detect	Not_detect	Not_detect
NC_017022.1	terminator_00126	373269	373299	+	TransTermHP	EFAU004_RS01840	NA	FALSE	Not_detect	Not_detect	Not_detect	Not_detect	Not_detect	Not_detect
NC_017022.1	terminator_00127	373803	373813	+	TransTermHP	EFAU004_RS14970	NA	FALSE	Not_detect	Not_detect	Not_detect	Not_detect	Not_detect	Not_detect
NC_017022.1	terminator_00128	378033	378054	+	gene_converged	EFAU004_RS01860	NA	FALSE	Not_detect	Not_detect	Not_detect	Not_detect	Not_detect	Not_detect
NC_017022.1	terminator_00129	386548	386588	+	gene_converged	EFAU004_RS01890	NA	FALSE	Not_detect	Not_detect	Not_detect	Not_detect	Not_detect	Not_detect
NC_017022.1	terminator_00130	386791	386831	-	gene_converged;TransTermHP	EFAU004_RS01895	NA	FALSE	Not_detect	Not_detect	Not_detect	Not_detect	Not_detect	Not_detect
NC_017022.1	terminator_00131	392065	392106	+	TransTermHP	EFAU004_RS01915	NA	FALSE	Not_detect	Not_detect	Not_detect	Not_detect	Not_detect	Not_detect
NC_017022.1	terminator_00132	394071	394087	+	TransTermHP	EFAU004_RS01925	NA	FALSE	Not_detect	Not_detect	Not_detect	Not_detect	Not_detect	Not_detect
NC_017022.1	terminator_00133	394744	394757	-	TransTermHP	EFAU004_RS01935	NA	FALSE	Not_detect	Not_detect	Not_detect	Not_detect	Not_detect	Not_detect
NC_017022.1	terminator_00134	395183	395199	+	TransTermHP	EFAU004_RS01930	NA	FALSE	Not_detect	Not_detect	Not_detect	Not_detect	Not_detect	Not_detect
NC_017022.1	terminator_00135	397124	397134	-	TransTermHP	EFAU004_RS14980	NA	FALSE	Not_detect	Not_detect	Not_detect	Not_detect	Not_detect	Not_detect
NC_017022.1	terminator_00136	397580	397615	+	TransTermHP	EFAU004_RS01950	NA	FALSE	Not_detect	Not_detect	Not_detect	Not_detect	Not_detect	Not_detect
NC_017022.1	terminator_00137	399340	399381	-	TransTermHP	EFAU004_RS01965	NA	FALSE	Not_detect	Not_detect	Not_detect	Not_detect	Not_detect	Not_detect
NC_017022.1	terminator_00138	399380	399407	+	gene_converged;TransTermHP	EFAU004_RS01960	NA	FALSE	Not_detect	Not_detect	Not_detect	Not_detect	Not_detect	Not_detect
NC_017022.1	terminator_00139	402768	402813	-	gene_converged;TransTermHP	EFAU004_RS01980	NA	FALSE	Not_detect	Not_detect	Not_detect	Not_detect	Not_detect	Not_detect
NC_017022.1	terminator_00140	408195	408233	+	TransTermHP	EFAU004_RS01990	NA	FALSE	Not_detect	Not_detect	Not_detect	Not_detect	Not_detect	Not_detect
NC_017022.1	terminator_00141	409848	409884	+	TransTermHP	EFAU004_RS01995	NA	FALSE	Not_detect	Not_detect	Not_detect	Not_detect	Not_detect	Not_detect
NC_017022.1	terminator_00142	411319	411382	-	gene_converged	EFAU004_RS02005	NA	FALSE	Not_detect	Not_detect	Not_detect	Not_detect	Not_detect	Not_detect
NC_017022.1	terminator_00143	411419	411467	+	gene_converged;TransTermHP	EFAU004_RS02000	NA	FALSE	Not_detect	Not_detect	Not_detect	Not_detect	Not_detect	Not_detect
NC_017022.1	terminator_00144	419215	419255	+	gene_converged;TransTermHP	EFAU004_RS02025	NA	FALSE	Not_detect	Not_detect	Not_detect	Not_detect	Not_detect	Not_detect
NC_017022.1	terminator_00145	419874	419938	-	gene_converged	EFAU004_RS02035	NA	FALSE	Not_detect	Not_detect	Not_detect	Not_detect	Not_detect	Not_detect
NC_017022.1	terminator_00146	420143	420193	+	gene_converged;TransTermHP	EFAU004_RS02030	NA	FALSE	Not_detect	Not_detect	Not_detect	Not_detect	Not_detect	Not_detect
NC_017022.1	terminator_00147	424320	424344	+	gene_converged	EFAU004_RS02045	NA	FALSE	Not_detect	Not_detect	Not_detect	Not_detect	Not_detect	Not_detect
NC_017022.1	terminator_00148	424055	424100	-	TransTermHP	EFAU004_RS02050	NA	FALSE	Not_detect	Not_detect	Not_detect	Not_detect	Not_detect	Not_detect
NC_017022.1	terminator_00149	425719	425776	-	TransTermHP	EFAU004_RS02060	NA	FALSE	Not_detect	Not_detect	Not_detect	Not_detect	Not_detect	Not_detect
NC_017022.1	terminator_00150	426079	426092	+	TransTermHP	EFAU004_RS02055	NA	FALSE	Not_detect	Not_detect	Not_detect	Not_detect	Not_detect	Not_detect
NC_017022.1	terminator_00151	429173	429203	-	TransTermHP	EFAU004_RS02080	NA	FALSE	Not_detect	Not_detect	Not_detect	Not_detect	Not_detect	Not_detect
NC_017022.1	terminator_00152	429621	429635	+	TransTermHP	EFAU004_RS14995	NA	FALSE	Not_detect	Not_detect	Not_detect	Not_detect	Not_detect	Not_detect
NC_017022.1	terminator_00153	436944	436983	+	gene_converged;TransTermHP	EFAU004_RS02110	NA	FALSE	Not_detect	Not_detect	Not_detect	Not_detect	Not_detect	Not_detect
NC_017022.1	terminator_00154	436792	436823	-	gene_converged;TransTermHP	EFAU004_RS02115	NA	FALSE	Not_detect	Not_detect	Not_detect	Not_detect	Not_detect	Not_detect
NC_017022.1	terminator_00155	440735	440761	+	TransTermHP	EFAU004_RS02135	NA	FALSE	Not_detect	Not_detect	Not_detect	Not_detect	Not_detect	Not_detect
NC_017022.1	terminator_00156	445475	445528	+	gene_converged;TransTermHP	EFAU004_RS02160	NA	FALSE	Not_detect	Not_detect	Not_detect	Not_detect	Not_detect	Not_detect
NC_017022.1	terminator_00157	446464	446483	-	gene_converged	EFAU004_RS02170	NA	FALSE	Not_detect	Not_detect	Not_detect	Not_detect	Not_detect	Not_detect
NC_017022.1	terminator_00158	457636	457669	+	TransTermHP	EFAU004_RS02205	NA	FALSE	Not_detect	Not_detect	Not_detect	Not_detect	Not_detect	Not_detect
NC_017022.1	terminator_00159	459317	459328	-	TransTermHP	EFAU004_RS15005	NA	FALSE	Not_detect	Not_detect	Not_detect	Not_detect	Not_detect	Not_detect
NC_017022.1	terminator_00160	459504	459526	-	gene_converged	EFAU004_RS02215	NA	FALSE	Not_detect	Not_detect	Not_detect	Not_detect	Not_detect	Not_detect
NC_017022.1	terminator_00161	462466	462519	+	TransTermHP	EFAU004_RS02220	NA	FALSE	Not_detect	Not_detect	Not_detect	Not_detect	Not_detect	Not_detect
NC_017022.1	terminator_00162	463244	463262	-	TransTermHP	EFAU004_RS02230	NA	FALSE	Not_detect	Not_detect	Not_detect	Not_detect	Not_detect	Not_detect
NC_017022.1	terminator_00163	466777	466829	-	TransTermHP	EFAU004_RS02250	NA	FALSE	Not_detect	Not_detect	Not_detect	Not_detect	Not_detect	Not_detect
NC_017022.1	terminator_00164	470069	470107	+	TransTermHP	EFAU004_RS02255	NA	FALSE	Not_detect	Not_detect	Not_detect	Not_detect	Not_detect	Not_detect
NC_017022.1	terminator_00165	471115	471145	+	TransTermHP	EFAU004_RS02265	NA	FALSE	Not_detect	Not_detect	Not_detect	Not_detect	Not_detect	Not_detect
NC_017022.1	terminator_00166	480184	480207	-	TransTermHP	EFAU004_RS15025	NC_017022.1_transcript466	FALSE	Not_detect	Not_detect	Not_detect	Not_detect	Not_detect	Not_detect
NC_017022.1	terminator_00167	480501	480514	+	TransTermHP	EFAU004_RS15020	NA	FALSE	Not_detect	Not_detect	Not_detect	Not_detect	Not_detect	Not_detect
NC_017022.1	terminator_00168	481184	481223	+	TransTermHP	EFAU004_RS02305	NA	FALSE	Not_detect	Not_detect	Not_detect	Not_detect	Not_detect	Not_detect
NC_017022.1	terminator_00169	493926	493954	-	TransTermHP	EFAU004_RS02370	NA	FALSE	Not_detect	Not_detect	Not_detect	Not_detect	Not_detect	Not_detect
NC_017022.1	terminator_00170	494228	494258	+	TransTermHP	EFAU004_RS02365	NA	FALSE	Not_detect	Not_detect	Not_detect	Not_detect	Not_detect	Not_detect
NC_017022.1	terminator_00171	496091	496137	-	TransTermHP	EFAU004_RS02380	NA	FALSE	Not_detect	Not_detect	Not_detect	Not_detect	Not_detect	Not_detect
NC_017022.1	terminator_00172	498422	498441	-	TransTermHP	EFAU004_RS02390	NC_017022.1_transcript480	FALSE	Not_detect	Not_detect	Not_detect	Not_detect	Not_detect	Not_detect
NC_017022.1	terminator_00173	500988	501010	+	TransTermHP	EFAU004_RS02395	NC_017022.1_transcript482	FALSE	Not_detect	Not_detect	Not_detect	Not_detect	Not_detect	Not_detect
NC_017022.1	terminator_00174	501968	501981	+	TransTermHP	EFAU004_RS02400	NC_017022.1_transcript484	FALSE	Not_detect	Not_detect	Not_detect	Not_detect	Not_detect	Not_detect
NC_017022.1	terminator_00175	502916	502964	-	gene_converged;TransTermHP	EFAU004_RS02415	NA	FALSE	Not_detect	Not_detect	Not_detect	Not_detect	Not_detect	Not_detect
NC_017022.1	terminator_00176	509199	509224	+	TransTermHP	EFAU004_RS02440	NA	FALSE	Not_detect	Not_detect	Not_detect	Not_detect	Not_detect	Not_detect
NC_017022.1	terminator_00177	511554	511573	-	TransTermHP	EFAU004_RS02455	NA	FALSE	Not_detect	Not_detect	Not_detect	Not_detect	Not_detect	Not_detect
NC_017022.1	terminator_00178	513191	513211	-	TransTermHP	EFAU004_RS02460	NA	FALSE	Not_detect	Not_detect	Not_detect	Not_detect	Not_detect	Not_detect
NC_017022.1	terminator_00179	517508	517528	+	TransTermHP	EFAU004_RS02475	NA	FALSE	Not_detect	Not_detect	Not_detect	Not_detect	Not_detect	Not_detect
NC_017022.1	terminator_00180	519789	519802	+	TransTermHP	EFAU004_RS02490	NC_017022.1_transcript500	FALSE	Not_detect	Not_detect	Not_detect	Not_detect	Not_detect	Not_detect
NC_017022.1	terminator_00181	520504	520530	+	TransTermHP	EFAU004_RS02495	NA	FALSE	Not_detect	Not_detect	Not_detect	Not_detect	Not_detect	Not_detect
NC_017022.1	terminator_00182	522579	522595	-	TransTermHP	EFAU004_RS02515	NA	FALSE	Not_detect	Not_detect	Not_detect	Not_detect	Not_detect	Not_detect
NC_017022.1	terminator_00183	522644	522670	+	gene_converged;TransTermHP	EFAU004_RS02510	NA	FALSE	Not_detect	Not_detect	Not_detect	Not_detect	Not_detect	Not_detect
NC_017022.1	terminator_00184	524021	524075	+	gene_converged;TransTermHP	EFAU004_RS02525	NA	FALSE	Not_detect	Not_detect	Not_detect	Not_detect	Not_detect	Not_detect
NC_017022.1	terminator_00185	525660	525711	+	gene_converged;TransTermHP	EFAU004_RS02535	NA	FALSE	Not_detect	Not_detect	Not_detect	Not_detect	Not_detect	Not_detect
NC_017022.1	terminator_00186	526210	526228	-	TransTermHP	EFAU004_RS02545	NA	FALSE	Not_detect	Not_detect	Not_detect	Not_detect	Not_detect	Not_detect
NC_017022.1	terminator_00187	529696	529731	+	gene_converged	EFAU004_RS02555	NA	FALSE	Not_detect	Not_detect	Not_detect	Not_detect	Not_detect	Not_detect
NC_017022.1	terminator_00188	531629	531664	+	TransTermHP	EFAU004_RS02570	NA	FALSE	Not_detect	Not_detect	Not_detect	Not_detect	Not_detect	Not_detect
NC_017022.1	terminator_00189	532371	532389	+	TransTermHP	EFAU004_RS02575	NA	FALSE	Not_detect	Not_detect	Not_detect	Not_detect	Not_detect	Not_detect
NC_017022.1	terminator_00190	539199	539231	+	TransTermHP	EFAU004_RS02590	NA	FALSE	Not_detect	Not_detect	Not_detect	Not_detect	Not_detect	Not_detect
NC_017022.1	terminator_00191	540207	540219	+	TransTermHP	EFAU004_RS02595	NA	FALSE	Not_detect	Not_detect	Not_detect	Not_detect	Not_detect	Not_detect
NC_017022.1	terminator_00192	542104	542114	+	TransTermHP	EFAU004_RS02605	NC_017022.1_transcript518	FALSE	Not_detect	Not_detect	Not_detect	Not_detect	Not_detect	Not_detect
NC_017022.1	terminator_00193	544457	544492	+	gene_converged;TransTermHP	EFAU004_RS02615	NA	FALSE	Not_detect	Not_detect	Not_detect	Not_detect	Not_detect	Not_detect
NC_017022.1	terminator_00194	548900	548946	+	TransTermHP	EFAU004_RS02645	NA	FALSE	Not_detect	Not_detect	Not_detect	Not_detect	Not_detect	Not_detect
NC_017022.1	terminator_00195	552452	552508	+	gene_converged;TransTermHP	EFAU004_RS02650	NA	FALSE	Not_detect	Not_detect	Not_detect	Not_detect	Not_detect	Not_detect
NC_017022.1	terminator_00196	552974	552993	+	TransTermHP	EFAU004_RS15055	NA	FALSE	Not_detect	Not_detect	Not_detect	Not_detect	Not_detect	Not_detect
NC_017022.1	terminator_00197	558823	558837	+	TransTermHP	EFAU004_RS02675	NA	FALSE	Not_detect	Not_detect	Not_detect	Not_detect	Not_detect	Not_detect
NC_017022.1	terminator_00198	560286	560318	-	TransTermHP	EFAU004_RS02685	NA	FALSE	Not_detect	Not_detect	Not_detect	Not_detect	Not_detect	Not_detect
NC_017022.1	terminator_00199	565337	565394	+	gene_converged;TransTermHP	EFAU004_RS02700	NA	FALSE	Not_detect	Not_detect	Not_detect	Not_detect	Not_detect	Not_detect
NC_017022.1	terminator_00200	570049	570090	-	gene_converged;TransTermHP	EFAU004_RS02725	NA	FALSE	Not_detect	Not_detect	Not_detect	Not_detect	Not_detect	Not_detect
NC_017022.1	terminator_00201	570049	570093	+	gene_converged;TransTermHP	EFAU004_RS02720	NA	FALSE	Not_detect	Not_detect	Not_detect	Not_detect	Not_detect	Not_detect
NC_017022.1	terminator_00202	571784	571825	-	TransTermHP	EFAU004_RS02735	NA	FALSE	Not_detect	Not_detect	Not_detect	Not_detect	Not_detect	Not_detect
NC_017022.1	terminator_00203	572962	573003	-	TransTermHP	EFAU004_RS15060	NA	FALSE	Not_detect	Not_detect	Not_detect	Not_detect	Not_detect	Not_detect
NC_017022.1	terminator_00204	573255	573269	-	TransTermHP	EFAU004_RS02740	NA	FALSE	Not_detect	Not_detect	Not_detect	Not_detect	Not_detect	Not_detect
NC_017022.1	terminator_00205	585734	585764	-	TransTermHP	EFAU004_RS02805	NA	FALSE	Not_detect	Not_detect	Not_detect	Not_detect	Not_detect	Not_detect
NC_017022.1	terminator_00206	588250	588303	+	TransTermHP	EFAU004_RS02815	NA	FALSE	Not_detect	Not_detect	Not_detect	Not_detect	Not_detect	Not_detect
NC_017022.1	terminator_00207	590368	590408	+	gene_converged;TransTermHP	EFAU004_RS02820	NA	FALSE	Not_detect	Not_detect	Not_detect	Not_detect	Not_detect	Not_detect
NC_017022.1	terminator_00208	590375	590396	-	TransTermHP	EFAU004_RS02825	NA	FALSE	Not_detect	Not_detect	Not_detect	Not_detect	Not_detect	Not_detect
NC_017022.1	terminator_00209	592107	592145	+	gene_converged	EFAU004_RS02840	NA	FALSE	Not_detect	Not_detect	Not_detect	Not_detect	Not_detect	Not_detect
NC_017022.1	terminator_00210	597707	597741	+	TransTermHP	EFAU004_RS02860	NA	FALSE	Not_detect	Not_detect	Not_detect	Not_detect	Not_detect	Not_detect
NC_017022.1	terminator_00211	600916	600927	+	TransTermHP	EFAU004_RS02870	NA	FALSE	Not_detect	Not_detect	Not_detect	Not_detect	Not_detect	Not_detect
NC_017022.1	terminator_00212	603970	603980	-	TransTermHP	EFAU004_RS15080	NA	FALSE	Not_detect	Not_detect	Not_detect	Not_detect	Not_detect	Not_detect
NC_017022.1	terminator_00213	604544	604585	+	TransTermHP	EFAU004_RS02875	NA	FALSE	Not_detect	Not_detect	Not_detect	Not_detect	Not_detect	Not_detect
NC_017022.1	terminator_00214	604797	604819	-	TransTermHP	EFAU004_RS02880	NC_017022.1_transcript565	FALSE	Not_detect	Not_detect	Not_detect	Not_detect	Not_detect	Not_detect
NC_017022.1	terminator_00215	606538	606571	-	TransTermHP	EFAU004_RS15085	NA	FALSE	Not_detect	Not_detect	Not_detect	Not_detect	Not_detect	Not_detect
NC_017022.1	terminator_00216	612953	612994	+	TransTermHP	EFAU004_RS02905	NA	FALSE	Not_detect	Not_detect	Not_detect	Not_detect	Not_detect	Not_detect
NC_017022.1	terminator_00217	619724	619772	+	TransTermHP	EFAU004_RS02935	NA	FALSE	Not_detect	Not_detect	Not_detect	Not_detect	Not_detect	Not_detect
NC_017022.1	terminator_00218	619725	619770	-	TransTermHP	EFAU004_RS02940	NA	FALSE	Not_detect	Not_detect	Not_detect	Not_detect	Not_detect	Not_detect
NC_017022.1	terminator_00219	621338	621399	-	gene_converged	transcript_00584	NC_017022.1_transcript584	FALSE	Not_detect	Not_detect	Not_detect	Not_detect	Not_detect	Not_detect
NC_017022.1	terminator_00220	621916	621966	+	TransTermHP	EFAU004_RS15100	NA	FALSE	Not_detect	Not_detect	Not_detect	Not_detect	Not_detect	Not_detect
NC_017022.1	terminator_00221	623977	623999	+	TransTermHP	EFAU004_RS02955	NA	FALSE	Not_detect	Not_detect	Not_detect	Not_detect	Not_detect	Not_detect
NC_017022.1	terminator_00222	626337	626391	+	TransTermHP	EFAU004_RS02970	NA	FALSE	Not_detect	Not_detect	Not_detect	Not_detect	Not_detect	Not_detect
NC_017022.1	terminator_00223	628321	628333	+	TransTermHP	EFAU004_RS02975	NA	FALSE	Not_detect	Not_detect	Not_detect	Not_detect	Not_detect	Not_detect
NC_017022.1	terminator_00224	629775	629804	+	TransTermHP	EFAU004_RS02980	NA	FALSE	Not_detect	Not_detect	Not_detect	Not_detect	Not_detect	Not_detect
NC_017022.1	terminator_00225	631229	631243	-	TransTermHP	EFAU004_RS15110	NA	FALSE	Not_detect	Not_detect	Not_detect	Not_detect	Not_detect	Not_detect
NC_017022.1	terminator_00226	631657	631702	+	TransTermHP	EFAU004_RS02995	NA	FALSE	Not_detect	Not_detect	Not_detect	Not_detect	Not_detect	Not_detect
NC_017022.1	terminator_00227	633815	633827	-	TransTermHP	EFAU004_RS03020	NA	FALSE	Not_detect	Not_detect	Not_detect	Not_detect	Not_detect	Not_detect
NC_017022.1	terminator_00228	634083	634098	+	TransTermHP	EFAU004_RS03010	NA	FALSE	Not_detect	Not_detect	Not_detect	Not_detect	Not_detect	Not_detect
NC_017022.1	terminator_00229	638728	638758	+	TransTermHP	EFAU004_RS03035	NA	FALSE	Not_detect	Not_detect	Not_detect	Not_detect	Not_detect	Not_detect
NC_017022.1	terminator_00230	641312	641331	+	gene_converged	EFAU004_RS03040	NA	FALSE	Not_detect	Not_detect	Not_detect	Not_detect	Not_detect	Not_detect
NC_017022.1	terminator_00231	641771	641830	-	gene_converged	EFAU004_RS03050	NA	FALSE	Not_detect	Not_detect	Not_detect	Not_detect	Not_detect	Not_detect
NC_017022.1	terminator_00232	642525	642549	+	TransTermHP	EFAU004_RS03045	NA	FALSE	Not_detect	Not_detect	Not_detect	Not_detect	Not_detect	Not_detect
NC_017022.1	terminator_00233	646606	646618	-	TransTermHP	EFAU004_RS15120	NA	FALSE	Not_detect	Not_detect	Not_detect	Not_detect	Not_detect	Not_detect
NC_017022.1	terminator_00234	651234	651247	+	TransTermHP	EFAU004_RS03080	NA	FALSE	Not_detect	Not_detect	Not_detect	Not_detect	Not_detect	Not_detect
NC_017022.1	terminator_00235	653016	653046	-	TransTermHP	EFAU004_RS03090	NA	FALSE	Not_detect	Not_detect	Not_detect	Not_detect	Not_detect	Not_detect
NC_017022.1	terminator_00236	653434	653444	+	TransTermHP	EFAU004_RS15130	NA	FALSE	Not_detect	Not_detect	Not_detect	Not_detect	Not_detect	Not_detect
NC_017022.1	terminator_00237	656713	656750	+	gene_converged;TransTermHP	EFAU004_RS03100	NA	FALSE	Not_detect	Not_detect	Not_detect	Not_detect	Not_detect	Not_detect
NC_017022.1	terminator_00238	661402	661426	+	TransTermHP	EFAU004_RS03120	NA	FALSE	Not_detect	Not_detect	Not_detect	Not_detect	Not_detect	Not_detect
NC_017022.1	terminator_00239	665546	665607	-	gene_converged;TransTermHP	EFAU004_RS03140	NA	FALSE	Not_detect	Not_detect	Not_detect	Not_detect	Not_detect	Not_detect
NC_017022.1	terminator_00240	665554	665598	+	gene_converged;TransTermHP	EFAU004_RS03135	NA	FALSE	Not_detect	Not_detect	Not_detect	Not_detect	Not_detect	Not_detect
NC_017022.1	terminator_00241	667738	667779	+	gene_converged;TransTermHP	EFAU004_RS03145	NA	FALSE	Not_detect	Not_detect	Not_detect	Not_detect	Not_detect	Not_detect
NC_017022.1	terminator_00242	667744	667774	-	TransTermHP	EFAU004_RS03150	NA	FALSE	Not_detect	Not_detect	Not_detect	Not_detect	Not_detect	Not_detect
NC_017022.1	terminator_00243	672167	672179	+	TransTermHP	EFAU004_RS03170	NA	FALSE	Not_detect	Not_detect	Not_detect	Not_detect	Not_detect	Not_detect
NC_017022.1	terminator_00244	674348	674411	-	gene_converged;TransTermHP	EFAU004_RS03185	NA	FALSE	Not_detect	Not_detect	Not_detect	Not_detect	Not_detect	Not_detect
NC_017022.1	terminator_00245	674448	674492	+	gene_converged;TransTermHP	EFAU004_RS03180	NA	FALSE	Not_detect	Not_detect	Not_detect	Not_detect	Not_detect	Not_detect
NC_017022.1	terminator_00246	676565	676579	+	TransTermHP	EFAU004_RS03195	NA	FALSE	Not_detect	Not_detect	Not_detect	Not_detect	Not_detect	Not_detect
NC_017022.1	terminator_00247	677436	677484	-	gene_converged;TransTermHP	EFAU004_RS03210	NA	FALSE	Not_detect	Not_detect	Not_detect	Not_detect	Not_detect	Not_detect
NC_017022.1	terminator_00248	682006	682036	+	TransTermHP	EFAU004_RS03235	NA	FALSE	Not_detect	Not_detect	Not_detect	Not_detect	Not_detect	Not_detect
NC_017022.1	terminator_00249	682092	682119	-	TransTermHP	EFAU004_RS03240	NC_017022.1_transcript651	FALSE	Not_detect	Not_detect	Not_detect	Not_detect	Not_detect	Not_detect
NC_017022.1	terminator_00250	686715	686767	+	gene_converged	EFAU004_RS03255	NA	FALSE	Not_detect	Not_detect	Not_detect	Not_detect	Not_detect	Not_detect
NC_017022.1	terminator_00251	689913	689962	+	TransTermHP	EFAU004_RS03265	NA	FALSE	Not_detect	Not_detect	Not_detect	Not_detect	Not_detect	Not_detect
NC_017022.1	terminator_00252	693020	693075	+	gene_converged;TransTermHP	EFAU004_RS03275	NA	FALSE	Not_detect	Not_detect	Not_detect	Not_detect	Not_detect	Not_detect
NC_017022.1	terminator_00253	695636	695715	-	gene_converged	EFAU004_RS03290	NA	FALSE	Not_detect	Not_detect	Not_detect	Not_detect	Not_detect	Not_detect
NC_017022.1	terminator_00254	695847	695886	+	TransTermHP	EFAU004_RS03285	NA	FALSE	Not_detect	Not_detect	Not_detect	Not_detect	Not_detect	Not_detect
NC_017022.1	terminator_00255	705296	705311	+	TransTermHP	EFAU004_RS03340	NA	FALSE	Not_detect	Not_detect	Not_detect	Not_detect	Not_detect	Not_detect
NC_017022.1	terminator_00256	708340	708370	+	TransTermHP	EFAU004_RS03345	NA	FALSE	Not_detect	Not_detect	Not_detect	Not_detect	Not_detect	Not_detect
NC_017022.1	terminator_00257	710219	710229	+	TransTermHP	EFAU004_RS03360	NA	FALSE	Not_detect	Not_detect	Not_detect	Not_detect	Not_detect	Not_detect
NC_017022.1	terminator_00258	711053	711072	+	TransTermHP	EFAU004_RS03365	NA	FALSE	Not_detect	Not_detect	Not_detect	Not_detect	Not_detect	Not_detect
NC_017022.1	terminator_00259	715369	715388	+	TransTermHP	EFAU004_RS03380	NA	FALSE	Not_detect	Not_detect	Not_detect	Not_detect	Not_detect	Not_detect
NC_017022.1	terminator_00260	716506	716568	+	gene_converged	EFAU004_RS03385	NA	FALSE	Not_detect	Not_detect	Not_detect	Not_detect	Not_detect	Not_detect
NC_017022.1	terminator_00261	716477	716526	-	gene_converged;TransTermHP	EFAU004_RS03390	NA	FALSE	Not_detect	Not_detect	Not_detect	Not_detect	Not_detect	Not_detect
NC_017022.1	terminator_00262	719161	719173	+	TransTermHP	EFAU004_RS03400	NA	FALSE	Not_detect	Not_detect	Not_detect	Not_detect	Not_detect	Not_detect
NC_017022.1	terminator_00263	720535	720573	+	TransTermHP	EFAU004_RS03405	NA	FALSE	Not_detect	Not_detect	Not_detect	Not_detect	Not_detect	Not_detect
NC_017022.1	terminator_00264	722040	722055	-	TransTermHP	EFAU004_RS03415	NA	FALSE	Not_detect	Not_detect	Not_detect	Not_detect	Not_detect	Not_detect
NC_017022.1	terminator_00265	722237	722254	+	TransTermHP	EFAU004_RS03410	NA	FALSE	Not_detect	Not_detect	Not_detect	Not_detect	Not_detect	Not_detect
NC_017022.1	terminator_00266	726429	726458	+	TransTermHP	EFAU004_RS03430	NA	FALSE	Not_detect	Not_detect	Not_detect	Not_detect	Not_detect	Not_detect
NC_017022.1	terminator_00267	728016	728045	-	TransTermHP	EFAU004_RS15175	NA	FALSE	Not_detect	Not_detect	Not_detect	Not_detect	Not_detect	Not_detect
NC_017022.1	terminator_00268	732023	732042	+	TransTermHP	EFAU004_RS03450	NC_017022.1_transcript695	FALSE	Not_detect	Not_detect	Not_detect	Not_detect	Not_detect	Not_detect
NC_017022.1	terminator_00269	735613	735671	+	TransTermHP	EFAU004_RS03470	NA	FALSE	Not_detect	Not_detect	Not_detect	Not_detect	Not_detect	Not_detect
NC_017022.1	terminator_00270	736655	736669	+	TransTermHP	EFAU004_RS03475	NC_017022.1_transcript701	FALSE	Not_detect	Not_detect	Not_detect	Not_detect	Not_detect	Not_detect
NC_017022.1	terminator_00271	737161	737189	+	TransTermHP	EFAU004_RS03480	NA	FALSE	Not_detect	Not_detect	Not_detect	Not_detect	Not_detect	Not_detect
NC_017022.1	terminator_00272	739852	739903	-	gene_converged	EFAU004_RS03500	NA	FALSE	Not_detect	Not_detect	Not_detect	Not_detect	Not_detect	Not_detect
NC_017022.1	terminator_00273	739935	739992	+	TransTermHP	EFAU004_RS03495	NA	FALSE	Not_detect	Not_detect	Not_detect	Not_detect	Not_detect	Not_detect
NC_017022.1	terminator_00274	748155	748169	+	TransTermHP	EFAU004_RS03540	NC_017022.1_transcript710	FALSE	Not_detect	Not_detect	Not_detect	Not_detect	Not_detect	Not_detect
NC_017022.1	terminator_00275	750391	750402	+	TransTermHP	EFAU004_RS03555	NC_017022.1_transcript715	FALSE	Not_detect	Not_detect	Not_detect	Not_detect	Not_detect	Not_detect
NC_017022.1	terminator_00276	759770	759798	+	TransTermHP	EFAU004_RS03590	NC_017022.1_transcript721	FALSE	Not_detect	Not_detect	Not_detect	Not_detect	Not_detect	Not_detect
NC_017022.1	terminator_00277	770779	770791	+	TransTermHP	EFAU004_RS03650	NA	FALSE	Not_detect	Not_detect	Not_detect	Not_detect	Not_detect	Not_detect
NC_017022.1	terminator_00278	773761	773772	+	TransTermHP	EFAU004_RS03665	NC_017022.1_transcript730	FALSE	Not_detect	Not_detect	Not_detect	Not_detect	Not_detect	Not_detect
NC_017022.1	terminator_00279	788682	788699	+	TransTermHP	EFAU004_RS03750	NC_017022.1_transcript738	FALSE	Not_detect	Not_detect	Not_detect	Not_detect	Not_detect	Not_detect
NC_017022.1	terminator_00280	797796	797811	+	TransTermHP	EFAU004_RS03800	NC_017022.1_transcript744	FALSE	Not_detect	Not_detect	Not_detect	Not_detect	Not_detect	Not_detect
NC_017022.1	terminator_00281	805946	805957	+	TransTermHP	EFAU004_RS15195	NC_017022.1_transcript744	FALSE	Not_detect	Not_detect	Not_detect	Not_detect	Not_detect	Not_detect
NC_017022.1	terminator_00282	812833	812852	-	TransTermHP	EFAU004_RS03865	NA	FALSE	Not_detect	Not_detect	Not_detect	Not_detect	Not_detect	Not_detect
NC_017022.1	terminator_00283	820079	820143	+	gene_converged	EFAU004_RS03895	NA	FALSE	Not_detect	Not_detect	Not_detect	Not_detect	Not_detect	Not_detect
NC_017022.1	terminator_00284	823938	823958	+	gene_converged	EFAU004_RS03920	NA	FALSE	Not_detect	Not_detect	Not_detect	Not_detect	Not_detect	Not_detect
NC_017022.1	terminator_00285	823857	823887	-	TransTermHP	EFAU004_RS03935	NA	FALSE	Not_detect	Not_detect	Not_detect	Not_detect	Not_detect	Not_detect
NC_017022.1	terminator_00286	825719	825730	-	TransTermHP	EFAU004_RS03940	NA	FALSE	Not_detect	Not_detect	Not_detect	Not_detect	Not_detect	Not_detect
NC_017022.1	terminator_00287	826540	826550	-	TransTermHP	EFAU004_RS03945	NA	FALSE	Not_detect	Not_detect	Not_detect	Not_detect	Not_detect	Not_detect
NC_017022.1	terminator_00288	827756	827775	-	TransTermHP	EFAU004_RS03955	NA	FALSE	Not_detect	Not_detect	Not_detect	Not_detect	Not_detect	Not_detect
NC_017022.1	terminator_00289	830386	830404	-	TransTermHP	EFAU004_RS03985	NA	FALSE	Not_detect	Not_detect	Not_detect	Not_detect	Not_detect	Not_detect
NC_017022.1	terminator_00290	830527	830541	+	TransTermHP	EFAU004_RS03980	NA	FALSE	Not_detect	Not_detect	Not_detect	Not_detect	Not_detect	Not_detect
NC_017022.1	terminator_00291	834698	834735	+	TransTermHP	EFAU004_RS04015	NA	FALSE	Not_detect	Not_detect	Not_detect	Not_detect	Not_detect	Not_detect
NC_017022.1	terminator_00292	837367	837382	+	TransTermHP	EFAU004_RS04055	NA	FALSE	Not_detect	Not_detect	Not_detect	Not_detect	Not_detect	Not_detect
NC_017022.1	terminator_00293	838087	838109	+	gene_converged	EFAU004_RS04060	NA	FALSE	Not_detect	Not_detect	Not_detect	Not_detect	Not_detect	Not_detect
NC_017022.1	terminator_00294	838088	838116	-	gene_converged	EFAU004_RS04065	NA	FALSE	Not_detect	Not_detect	Not_detect	Not_detect	Not_detect	Not_detect
NC_017022.1	terminator_00295	839390	839408	+	TransTermHP	EFAU004_RS15200	NA	FALSE	Not_detect	Not_detect	Not_detect	Not_detect	Not_detect	Not_detect
NC_017022.1	terminator_00296	842334	842346	+	TransTermHP	EFAU004_RS04090	NA	FALSE	Not_detect	Not_detect	Not_detect	Not_detect	Not_detect	Not_detect
NC_017022.1	terminator_00297	852320	852338	+	TransTermHP	EFAU004_RS04150	NA	FALSE	Not_detect	Not_detect	Not_detect	Not_detect	Not_detect	Not_detect
NC_017022.1	terminator_00298	853282	853319	+	gene_converged	EFAU004_RS04155	NA	FALSE	Not_detect	Not_detect	Not_detect	Not_detect	Not_detect	Not_detect
NC_017022.1	terminator_00299	855424	855449	+	TransTermHP	EFAU004_RS04160	NA	FALSE	Not_detect	Not_detect	Not_detect	Not_detect	Not_detect	Not_detect
NC_017022.1	terminator_00300	858250	858269	+	TransTermHP	EFAU004_RS15205	NA	FALSE	Not_detect	Not_detect	Not_detect	Not_detect	Not_detect	Not_detect
NC_017022.1	terminator_00301	859896	859925	+	TransTermHP	EFAU004_RS04185	NA	FALSE	Not_detect	Not_detect	Not_detect	Not_detect	Not_detect	Not_detect
NC_017022.1	terminator_00302	864043	864088	-	TransTermHP	EFAU004_RS04225	NA	FALSE	Not_detect	Not_detect	Not_detect	Not_detect	Not_detect	Not_detect
NC_017022.1	terminator_00303	870594	870604	+	TransTermHP	EFAU004_RS04250	NA	FALSE	Not_detect	Not_detect	Not_detect	Not_detect	Not_detect	Not_detect
NC_017022.1	terminator_00304	874853	874897	+	gene_converged	EFAU004_RS04275	NA	FALSE	Not_detect	Not_detect	Not_detect	Not_detect	Not_detect	Not_detect
NC_017022.1	terminator_00305	876599	876631	+	gene_converged	EFAU004_RS04280	NA	FALSE	Not_detect	Not_detect	Not_detect	Not_detect	Not_detect	Not_detect
NC_017022.1	terminator_00306	877378	877415	+	TransTermHP	EFAU004_RS04285	NA	FALSE	Not_detect	Not_detect	Not_detect	Not_detect	Not_detect	Not_detect
NC_017022.1	terminator_00307	878940	878955	-	TransTermHP	EFAU004_RS04300	NA	FALSE	Not_detect	Not_detect	Not_detect	Not_detect	Not_detect	Not_detect
NC_017022.1	terminator_00308	883023	883082	-	gene_converged	EFAU004_RS04315	NC_017022.1_transcript824	FALSE	Not_detect	Not_detect	Not_detect	Not_detect	Not_detect	Not_detect
NC_017022.1	terminator_00309	885767	885825	-	gene_converged	EFAU004_RS04330	NC_017022.1_transcript828	FALSE	Not_detect	Not_detect	Not_detect	Not_detect	Not_detect	Not_detect
NC_017022.1	terminator_00310	886623	886642	-	TransTermHP	EFAU004_RS04335	NA	FALSE	Not_detect	Not_detect	Not_detect	Not_detect	Not_detect	Not_detect
NC_017022.1	terminator_00311	889230	889241	+	TransTermHP	EFAU004_RS04340	NA	FALSE	Not_detect	Not_detect	Not_detect	Not_detect	Not_detect	Not_detect
NC_017022.1	terminator_00312	890167	890178	-	TransTermHP	EFAU004_RS04350	NA	FALSE	Not_detect	Not_detect	Not_detect	Not_detect	Not_detect	Not_detect
NC_017022.1	terminator_00313	890366	890412	+	gene_converged;TransTermHP	EFAU004_RS04345	NA	FALSE	Not_detect	Not_detect	Not_detect	Not_detect	Not_detect	Not_detect
NC_017022.1	terminator_00314	893348	893388	+	TransTermHP	EFAU004_RS04355	NA	FALSE	Not_detect	Not_detect	Not_detect	Not_detect	Not_detect	Not_detect
NC_017022.1	terminator_00315	893342	893397	-	gene_converged;TransTermHP	EFAU004_RS04360	NA	FALSE	Not_detect	Not_detect	Not_detect	Not_detect	Not_detect	Not_detect
NC_017022.1	terminator_00316	900655	900680	+	TransTermHP	EFAU004_RS04390	NA	FALSE	Not_detect	Not_detect	Not_detect	Not_detect	Not_detect	Not_detect
NC_017022.1	terminator_00317	903778	903788	+	TransTermHP	EFAU004_RS04405	NC_017022.1_transcript849	FALSE	Not_detect	Not_detect	Not_detect	Not_detect	Not_detect	Not_detect
NC_017022.1	terminator_00318	905136	905146	+	TransTermHP	EFAU004_RS04410	NA	FALSE	Not_detect	Not_detect	Not_detect	Not_detect	Not_detect	Not_detect
NC_017022.1	terminator_00319	912484	912494	-	TransTermHP	EFAU004_RS04455	NA	FALSE	Not_detect	Not_detect	Not_detect	Not_detect	Not_detect	Not_detect
NC_017022.1	terminator_00320	912567	912607	+	TransTermHP	EFAU004_RS04450	NA	FALSE	Not_detect	Not_detect	Not_detect	Not_detect	Not_detect	Not_detect
NC_017022.1	terminator_00321	913220	913242	-	TransTermHP	EFAU004_RS04460	NA	FALSE	Not_detect	Not_detect	Not_detect	Not_detect	Not_detect	Not_detect
NC_017022.1	terminator_00322	914633	914661	-	TransTermHP	EFAU004_RS04465	NA	FALSE	Not_detect	Not_detect	Not_detect	Not_detect	Not_detect	Not_detect
NC_017022.1	terminator_00323	923894	923920	+	TransTermHP	EFAU004_RS04510	NA	FALSE	Not_detect	Not_detect	Not_detect	Not_detect	Not_detect	Not_detect
NC_017022.1	terminator_00324	924945	924983	+	gene_converged;TransTermHP	EFAU004_RS04515	NA	FALSE	Not_detect	Not_detect	Not_detect	Not_detect	Not_detect	Not_detect
NC_017022.1	terminator_00325	924951	924979	-	gene_converged;TransTermHP	EFAU004_RS04520	NA	FALSE	Not_detect	Not_detect	Not_detect	Not_detect	Not_detect	Not_detect
NC_017022.1	terminator_00326	933093	933118	-	gene_converged	EFAU004_RS04555	NA	FALSE	Not_detect	Not_detect	Not_detect	Not_detect	Not_detect	Not_detect
NC_017022.1	terminator_00327	937663	937704	+	gene_converged;TransTermHP	EFAU004_RS04565	NA	FALSE	Not_detect	Not_detect	Not_detect	Not_detect	Not_detect	Not_detect
NC_017022.1	terminator_00328	942105	942121	-	TransTermHP	EFAU004_RS04595	NA	FALSE	Not_detect	Not_detect	Not_detect	Not_detect	Not_detect	Not_detect
NC_017022.1	terminator_00329	942377	942442	+	gene_converged;TransTermHP	EFAU004_RS04590	NA	FALSE	Not_detect	Not_detect	Not_detect	Not_detect	Not_detect	Not_detect
NC_017022.1	terminator_00330	950802	950839	+	TransTermHP	EFAU004_RS04610	NA	FALSE	Not_detect	Not_detect	Not_detect	Not_detect	Not_detect	Not_detect
NC_017022.1	terminator_00331	951842	951870	+	gene_converged	EFAU004_RS04615	NA	FALSE	Not_detect	Not_detect	Not_detect	Not_detect	Not_detect	Not_detect
NC_017022.1	terminator_00332	951761	951805	-	gene_converged;TransTermHP	EFAU004_RS04620	NA	FALSE	Not_detect	Not_detect	Not_detect	Not_detect	Not_detect	Not_detect
NC_017022.1	terminator_00333	958436	958469	+	gene_converged	EFAU004_RS04645	NA	FALSE	Not_detect	Not_detect	Not_detect	Not_detect	Not_detect	Not_detect
NC_017022.1	terminator_00334	962822	962833	+	TransTermHP	EFAU004_RS04660	NA	FALSE	Not_detect	Not_detect	Not_detect	Not_detect	Not_detect	Not_detect
NC_017022.1	terminator_00335	964270	964291	+	gene_converged	EFAU004_RS04665	NA	FALSE	Not_detect	Not_detect	Not_detect	Not_detect	Not_detect	Not_detect
NC_017022.1	terminator_00336	964368	964397	-	gene_converged	EFAU004_RS04670	NA	FALSE	Not_detect	Not_detect	Not_detect	Not_detect	Not_detect	Not_detect
NC_017022.1	terminator_00337	965416	965442	-	TransTermHP	EFAU004_RS04680	NA	FALSE	Not_detect	Not_detect	Not_detect	Not_detect	Not_detect	Not_detect
NC_017022.1	terminator_00338	970040	970052	-	TransTermHP	EFAU004_RS04700	NA	FALSE	Not_detect	Not_detect	Not_detect	Not_detect	Not_detect	Not_detect
NC_017022.1	terminator_00339	971068	971112	-	TransTermHP	EFAU004_RS04705	NA	FALSE	Not_detect	Not_detect	Not_detect	Not_detect	Not_detect	Not_detect
NC_017022.1	terminator_00340	974118	974141	-	TransTermHP	EFAU004_RS04720	NA	FALSE	Not_detect	Not_detect	Not_detect	Not_detect	Not_detect	Not_detect
NC_017022.1	terminator_00341	974889	974909	-	gene_converged	EFAU004_RS04725	NC_017022.1_transcript910	FALSE	Not_detect	Not_detect	Not_detect	Not_detect	Not_detect	Not_detect
NC_017022.1	terminator_00342	975378	975390	+	TransTermHP	EFAU004_RS15220	NA	FALSE	Not_detect	Not_detect	Not_detect	Not_detect	Not_detect	Not_detect
NC_017022.1	terminator_00343	979624	979649	-	gene_converged	EFAU004_RS04745	NC_017022.1_transcript915	FALSE	Not_detect	Not_detect	Not_detect	Not_detect	Not_detect	Not_detect
NC_017022.1	terminator_00344	992284	992316	-	gene_converged;TransTermHP	EFAU004_RS04805	NC_017022.1_transcript917	FALSE	Not_detect	Not_detect	Not_detect	Not_detect	Not_detect	Not_detect
NC_017022.1	terminator_00345	995041	995065	-	TransTermHP	EFAU004_RS04825	NA	FALSE	Not_detect	Not_detect	Not_detect	Not_detect	Not_detect	Not_detect
NC_017022.1	terminator_00346	997186	997200	-	TransTermHP	EFAU004_RS04835	NA	FALSE	Not_detect	Not_detect	Not_detect	Not_detect	Not_detect	Not_detect
NC_017022.1	terminator_00347	998189	998222	-	gene_converged;TransTermHP	EFAU004_RS04845	NA	FALSE	Not_detect	Not_detect	Not_detect	Not_detect	Not_detect	Not_detect
NC_017022.1	terminator_00348	1006834	1006885	-	gene_converged;TransTermHP	EFAU004_RS04885	NA	FALSE	Not_detect	Not_detect	Not_detect	Not_detect	Not_detect	Not_detect
NC_017022.1	terminator_00349	1006966	1006984	+	gene_converged	EFAU004_RS04880	NA	FALSE	Not_detect	Not_detect	Not_detect	Not_detect	Not_detect	Not_detect
NC_017022.1	terminator_00350	1006966	1006984	+	gene_converged	EFAU004_RS04880	NA	FALSE	Not_detect	Not_detect	Not_detect	Not_detect	Not_detect	Not_detect
NC_017022.1	terminator_00351	1008403	1008429	-	TransTermHP	EFAU004_RS04890	NA	FALSE	Not_detect	Not_detect	Not_detect	Not_detect	Not_detect	Not_detect
NC_017022.1	terminator_00352	1011092	1011120	-	TransTermHP	EFAU004_RS15230	NA	FALSE	Not_detect	Not_detect	Not_detect	Not_detect	Not_detect	Not_detect
NC_017022.1	terminator_00353	1011426	1011439	+	TransTermHP	EFAU004_RS15225	NA	FALSE	Not_detect	Not_detect	Not_detect	Not_detect	Not_detect	Not_detect
NC_017022.1	terminator_00354	1013613	1013633	-	TransTermHP	EFAU004_RS04910	NC_017022.1_transcript935	FALSE	Not_detect	Not_detect	Not_detect	Not_detect	Not_detect	Not_detect
NC_017022.1	terminator_00355	1015888	1015899	-	TransTermHP	EFAU004_RS04920	NC_017022.1_transcript935	FALSE	Not_detect	Not_detect	Not_detect	Not_detect	Not_detect	Not_detect
NC_017022.1	terminator_00356	1020472	1020508	-	gene_converged;TransTermHP	EFAU004_RS04935	NA	FALSE	Not_detect	Not_detect	Not_detect	Not_detect	Not_detect	Not_detect
NC_017022.1	terminator_00357	1020479	1020504	+	TransTermHP	EFAU004_RS15240	NA	FALSE	Not_detect	Not_detect	Not_detect	Not_detect	Not_detect	Not_detect
NC_017022.1	terminator_00358	1023323	1023339	-	TransTermHP	EFAU004_RS04950	NA	FALSE	Not_detect	Not_detect	Not_detect	Not_detect	Not_detect	Not_detect
NC_017022.1	terminator_00359	1023380	1023404	+	TransTermHP	EFAU004_RS04945	NA	FALSE	Not_detect	Not_detect	Not_detect	Not_detect	Not_detect	Not_detect
NC_017022.1	terminator_00360	1023875	1023900	-	TransTermHP	EFAU004_RS04955	NA	FALSE	Not_detect	Not_detect	Not_detect	Not_detect	Not_detect	Not_detect
NC_017022.1	terminator_00361	1026022	1026047	-	TransTermHP	EFAU004_RS04965	NA	FALSE	Not_detect	Not_detect	Not_detect	Not_detect	Not_detect	Not_detect
NC_017022.1	terminator_00362	1027782	1027816	-	TransTermHP	EFAU004_RS04975	NC_017022.1_transcript945	FALSE	Not_detect	Not_detect	Not_detect	Not_detect	Not_detect	Not_detect
NC_017022.1	terminator_00363	1029871	1029904	-	gene_converged	EFAU004_RS04985	NC_017022.1_transcript948	FALSE	Not_detect	Not_detect	Not_detect	Not_detect	Not_detect	Not_detect
NC_017022.1	terminator_00364	1029971	1030003	+	TransTermHP	EFAU004_RS04980	NA	FALSE	Not_detect	Not_detect	Not_detect	Not_detect	Not_detect	Not_detect
NC_017022.1	terminator_00365	1033182	1033207	+	TransTermHP	EFAU004_RS04995	NA	FALSE	Not_detect	Not_detect	Not_detect	Not_detect	Not_detect	Not_detect
NC_017022.1	terminator_00366	1033740	1033784	+	TransTermHP	EFAU004_RS05000	NA	FALSE	Not_detect	Not_detect	Not_detect	Not_detect	Not_detect	Not_detect
NC_017022.1	terminator_00367	1033633	1033661	-	gene_converged	EFAU004_RS05005	NA	FALSE	Not_detect	Not_detect	Not_detect	Not_detect	Not_detect	Not_detect
NC_017022.1	terminator_00368	1036508	1036526	-	gene_converged	EFAU004_RS05015	NC_017022.1_transcript952	FALSE	Not_detect	Not_detect	Not_detect	Not_detect	Not_detect	Not_detect
NC_017022.1	terminator_00369	1039059	1039093	-	gene_converged	EFAU004_RS05030	NA	FALSE	Not_detect	Not_detect	Not_detect	Not_detect	Not_detect	Not_detect
NC_017022.1	terminator_00370	1042584	1042630	-	gene_converged;TransTermHP	EFAU004_RS05045	NA	FALSE	Not_detect	Not_detect	Not_detect	Not_detect	Not_detect	Not_detect
NC_017022.1	terminator_00371	1044775	1044812	-	TransTermHP	EFAU004_RS05055	NC_017022.1_transcript965	FALSE	Not_detect	Not_detect	Not_detect	Not_detect	Not_detect	Not_detect
NC_017022.1	terminator_00372	1048438	1048469	-	TransTermHP	EFAU004_RS05075	NA	FALSE	Not_detect	Not_detect	Not_detect	Not_detect	Not_detect	Not_detect
NC_017022.1	terminator_00373	1050635	1050685	-	gene_converged;TransTermHP	EFAU004_RS05085	NA	FALSE	Not_detect	Not_detect	Not_detect	Not_detect	Not_detect	Not_detect
NC_017022.1	terminator_00374	1050734	1050773	+	TransTermHP	EFAU004_RS05080	NA	FALSE	Not_detect	Not_detect	Not_detect	Not_detect	Not_detect	Not_detect
NC_017022.1	terminator_00375	1051463	1051483	-	TransTermHP	EFAU004_RS05090	NC_017022.1_transcript972	FALSE	Not_detect	Not_detect	Not_detect	Not_detect	Not_detect	Not_detect
NC_017022.1	terminator_00376	1058530	1058561	-	gene_converged	EFAU004_RS05130	NA	FALSE	Not_detect	Not_detect	Not_detect	Not_detect	Not_detect	Not_detect
NC_017022.1	terminator_00377	1058595	1058633	+	gene_converged;TransTermHP	EFAU004_RS05125	NA	FALSE	Not_detect	Not_detect	Not_detect	Not_detect	Not_detect	Not_detect
NC_017022.1	terminator_00378	1071685	1071729	-	gene_converged	EFAU004_RS05165	NA	FALSE	Not_detect	Not_detect	Not_detect	Not_detect	Not_detect	Not_detect
NC_017022.1	terminator_00379	1074878	1074905	-	TransTermHP	EFAU004_RS05180	NC_017022.1_transcript982	FALSE	Not_detect	Not_detect	Not_detect	Not_detect	Not_detect	Not_detect
NC_017022.1	terminator_00380	1076145	1076165	+	TransTermHP	EFAU004_RS05185	NC_017022.1_transcript984	FALSE	Not_detect	Not_detect	Not_detect	Not_detect	Not_detect	Not_detect
NC_017022.1	terminator_00381	1076798	1076830	-	TransTermHP	EFAU004_RS05200	NA	FALSE	Not_detect	Not_detect	Not_detect	Not_detect	Not_detect	Not_detect
NC_017022.1	terminator_00382	1077716	1077753	-	TransTermHP	EFAU004_RS05210	NA	FALSE	Not_detect	Not_detect	Not_detect	Not_detect	Not_detect	Not_detect
NC_017022.1	terminator_00383	1078686	1078736	-	gene_converged;TransTermHP	EFAU004_RS05225	NA	FALSE	Not_detect	Not_detect	Not_detect	Not_detect	Not_detect	Not_detect
NC_017022.1	terminator_00384	1080861	1080893	-	TransTermHP	EFAU004_RS05245	NA	FALSE	Not_detect	Not_detect	Not_detect	Not_detect	Not_detect	Not_detect
NC_017022.1	terminator_00385	1082348	1082407	+	gene_converged;TransTermHP	EFAU004_RS05250	NA	FALSE	Not_detect	Not_detect	Not_detect	Not_detect	Not_detect	Not_detect
NC_017022.1	terminator_00386	1082916	1082931	-	TransTermHP	EFAU004_RS05260	NA	FALSE	Not_detect	Not_detect	Not_detect	Not_detect	Not_detect	Not_detect
NC_017022.1	terminator_00387	1088668	1088682	+	TransTermHP	EFAU004_RS05280	NA	FALSE	Not_detect	Not_detect	Not_detect	Not_detect	Not_detect	Not_detect
NC_017022.1	terminator_00388	1091829	1091845	+	TransTermHP	EFAU004_RS05290	NC_017022.1_transcript1010	FALSE	Not_detect	Not_detect	Not_detect	Not_detect	Not_detect	Not_detect
NC_017022.1	terminator_00389	1093743	1093788	-	gene_converged;TransTermHP	EFAU004_RS05310	NA	FALSE	Not_detect	Not_detect	Not_detect	Not_detect	Not_detect	Not_detect
NC_017022.1	terminator_00390	1117500	1117518	-	gene_converged	EFAU004_RS05420	NC_017022.1_transcript1023	FALSE	Not_detect	Not_detect	Not_detect	Not_detect	Not_detect	Not_detect
NC_017022.1	terminator_00391	1119276	1119300	-	TransTermHP	EFAU004_RS05425	NA	FALSE	Not_detect	Not_detect	Not_detect	Not_detect	Not_detect	Not_detect
NC_017022.1	terminator_00392	1119762	1119777	+	TransTermHP	EFAU004_RS15260	NA	FALSE	Not_detect	Not_detect	Not_detect	Not_detect	Not_detect	Not_detect
NC_017022.1	terminator_00393	1120837	1120877	-	TransTermHP	EFAU004_RS05430	NA	FALSE	Not_detect	Not_detect	Not_detect	Not_detect	Not_detect	Not_detect
NC_017022.1	terminator_00394	1122202	1122228	-	TransTermHP	EFAU004_RS05435	NA	FALSE	Not_detect	Not_detect	Not_detect	Not_detect	Not_detect	Not_detect
NC_017022.1	terminator_00395	1130429	1130486	-	gene_converged;TransTermHP	EFAU004_RS05465	NA	FALSE	Not_detect	Not_detect	Not_detect	Not_detect	Not_detect	Not_detect
NC_017022.1	terminator_00396	1130431	1130485	+	gene_converged;TransTermHP	EFAU004_RS05460	NA	FALSE	Not_detect	Not_detect	Not_detect	Not_detect	Not_detect	Not_detect
NC_017022.1	terminator_00397	1131469	1131479	-	TransTermHP	EFAU004_RS05470	NA	FALSE	Not_detect	Not_detect	Not_detect	Not_detect	Not_detect	Not_detect
NC_017022.1	terminator_00398	1134948	1134959	-	TransTermHP	EFAU004_RS05485	NA	FALSE	Not_detect	Not_detect	Not_detect	Not_detect	Not_detect	Not_detect
NC_017022.1	terminator_00399	1142052	1142093	-	gene_converged	EFAU004_RS05520	NA	FALSE	Not_detect	Not_detect	Not_detect	Not_detect	Not_detect	Not_detect
NC_017022.1	terminator_00400	1142134	1142178	+	gene_converged	EFAU004_RS05515	NA	FALSE	Not_detect	Not_detect	Not_detect	Not_detect	Not_detect	Not_detect
NC_017022.1	terminator_00401	1143558	1143593	-	TransTermHP	EFAU004_RS05525	NA	FALSE	Not_detect	Not_detect	Not_detect	Not_detect	Not_detect	Not_detect
NC_017022.1	terminator_00402	1153139	1153151	-	TransTermHP	EFAU004_RS05570	NA	FALSE	Not_detect	Not_detect	Not_detect	Not_detect	Not_detect	Not_detect
NC_017022.1	terminator_00403	1154938	1154978	-	gene_converged	EFAU004_RS05575	NA	FALSE	Not_detect	Not_detect	Not_detect	Not_detect	Not_detect	Not_detect
NC_017022.1	terminator_00404	1158878	1158892	-	TransTermHP	EFAU004_RS15275	NA	FALSE	Not_detect	Not_detect	Not_detect	Not_detect	Not_detect	Not_detect
NC_017022.1	terminator_00405	1160910	1160959	-	gene_converged;TransTermHP	EFAU004_RS05610	NA	FALSE	Not_detect	Not_detect	Not_detect	Not_detect	Not_detect	Not_detect
NC_017022.1	terminator_00406	1165547	1165600	-	gene_converged;TransTermHP	EFAU004_RS05635	NA	FALSE	Not_detect	Not_detect	Not_detect	Not_detect	Not_detect	Not_detect
NC_017022.1	terminator_00407	1165550	1165600	+	gene_converged;TransTermHP	EFAU004_RS05630	NA	FALSE	Not_detect	Not_detect	Not_detect	Not_detect	Not_detect	Not_detect
NC_017022.1	terminator_00408	1169160	1169171	-	TransTermHP	EFAU004_RS05650	NC_017022.1_transcript1047	FALSE	Not_detect	Not_detect	Not_detect	Not_detect	Not_detect	Not_detect
NC_017022.1	terminator_00409	1175502	1175544	+	gene_converged	EFAU004_RS15290	NA	FALSE	Not_detect	Not_detect	Not_detect	Not_detect	Not_detect	Not_detect
NC_017022.1	terminator_00410	1175417	1175437	-	gene_converged	EFAU004_RS05690	NA	FALSE	Not_detect	Not_detect	Not_detect	Not_detect	Not_detect	Not_detect
NC_017022.1	terminator_00411	1175982	1176010	-	TransTermHP	EFAU004_RS05695	NA	FALSE	Not_detect	Not_detect	Not_detect	Not_detect	Not_detect	Not_detect
NC_017022.1	terminator_00412	1177804	1177832	+	TransTermHP	EFAU004_RS05700	NA	FALSE	Not_detect	Not_detect	Not_detect	Not_detect	Not_detect	Not_detect
NC_017022.1	terminator_00413	1185188	1185211	-	gene_converged	EFAU004_RS05740	NA	FALSE	Not_detect	Not_detect	Not_detect	Not_detect	Not_detect	Not_detect
NC_017022.1	terminator_00414	1185555	1185570	+	TransTermHP	EFAU004_RS15295	NA	FALSE	Not_detect	Not_detect	Not_detect	Not_detect	Not_detect	Not_detect
NC_017022.1	terminator_00415	1186651	1186674	-	gene_converged	EFAU004_RS05755	NA	FALSE	Not_detect	Not_detect	Not_detect	Not_detect	Not_detect	Not_detect
NC_017022.1	terminator_00416	1186835	1186860	+	gene_converged	EFAU004_RS05750	NA	FALSE	Not_detect	Not_detect	Not_detect	Not_detect	Not_detect	Not_detect
NC_017022.1	terminator_00417	1187640	1187658	-	TransTermHP	EFAU004_RS05760	NC_017022.1_transcript1069	FALSE	Not_detect	Not_detect	Not_detect	Not_detect	Not_detect	Not_detect
NC_017022.1	terminator_00418	1188800	1188833	-	TransTermHP	EFAU004_RS05765	NC_017022.1_transcript1071	FALSE	Not_detect	Not_detect	Not_detect	Not_detect	Not_detect	Not_detect
NC_017022.1	terminator_00419	1191439	1191475	-	TransTermHP	EFAU004_RS05785	NA	FALSE	Not_detect	Not_detect	Not_detect	Not_detect	Not_detect	Not_detect
NC_017022.1	terminator_00420	1191851	1191867	+	TransTermHP	EFAU004_RS05780	NA	FALSE	Not_detect	Not_detect	Not_detect	Not_detect	Not_detect	Not_detect
NC_017022.1	terminator_00421	1194801	1194838	-	TransTermHP	EFAU004_RS05800	NA	FALSE	Not_detect	Not_detect	Not_detect	Not_detect	Not_detect	Not_detect
NC_017022.1	terminator_00422	1197391	1197424	-	TransTermHP	EFAU004_RS05805	NA	FALSE	Not_detect	Not_detect	Not_detect	Not_detect	Not_detect	Not_detect
NC_017022.1	terminator_00423	1201976	1201988	-	TransTermHP	EFAU004_RS05815	NC_017022.1_transcript1079	FALSE	Not_detect	Not_detect	Not_detect	Not_detect	Not_detect	Not_detect
NC_017022.1	terminator_00424	1212728	1212768	-	TransTermHP	EFAU004_RS05865	NA	FALSE	Not_detect	Not_detect	Not_detect	Not_detect	Not_detect	Not_detect
NC_017022.1	terminator_00425	1215867	1215915	+	gene_converged;TransTermHP	EFAU004_RS05880	NA	FALSE	Not_detect	Not_detect	Not_detect	Not_detect	Not_detect	Not_detect
NC_017022.1	terminator_00426	1224324	1224348	-	TransTermHP	EFAU004_RS05935	NA	FALSE	Not_detect	Not_detect	Not_detect	Not_detect	Not_detect	Not_detect
NC_017022.1	terminator_00427	1226998	1227030	-	TransTermHP	EFAU004_RS05945	NA	FALSE	Not_detect	Not_detect	Not_detect	Not_detect	Not_detect	Not_detect
NC_017022.1	terminator_00428	1233977	1233994	-	TransTermHP	EFAU004_RS05985	NC_017022.1_transcript1109	FALSE	Not_detect	Not_detect	Not_detect	Not_detect	Not_detect	Not_detect
NC_017022.1	terminator_00429	1237698	1237712	-	TransTermHP	EFAU004_RS06000	NC_017022.1_transcript1113	FALSE	Not_detect	Not_detect	Not_detect	Not_detect	Not_detect	Not_detect
NC_017022.1	terminator_00430	1238392	1238413	-	TransTermHP	EFAU004_RS06005	NA	FALSE	Not_detect	Not_detect	Not_detect	Not_detect	Not_detect	Not_detect
NC_017022.1	terminator_00431	1241188	1241198	+	TransTermHP	EFAU004_RS06015	NA	FALSE	Not_detect	Not_detect	Not_detect	Not_detect	Not_detect	Not_detect
NC_017022.1	terminator_00432	1246302	1246325	-	TransTermHP	EFAU004_RS06040	NC_017022.1_transcript1119	FALSE	Not_detect	Not_detect	Not_detect	Not_detect	Not_detect	Not_detect
NC_017022.1	terminator_00433	1250501	1250513	-	TransTermHP	EFAU004_RS06070	NC_017022.1_transcript1122	FALSE	Not_detect	Not_detect	Not_detect	Not_detect	Not_detect	Not_detect
NC_017022.1	terminator_00434	1251530	1251558	-	TransTermHP	EFAU004_RS06075	NA	FALSE	Not_detect	Not_detect	Not_detect	Not_detect	Not_detect	Not_detect
NC_017022.1	terminator_00435	1253850	1253873	-	TransTermHP	EFAU004_RS06080	NA	FALSE	Not_detect	Not_detect	Not_detect	Not_detect	Not_detect	Not_detect
NC_017022.1	terminator_00436	1256783	1256802	-	gene_converged	EFAU004_RS06090	NC_017022.1_transcript1126	FALSE	Not_detect	Not_detect	Not_detect	Not_detect	Not_detect	Not_detect
NC_017022.1	terminator_00437	1264725	1264779	-	gene_converged	EFAU004_RS06115	NA	FALSE	Not_detect	Not_detect	Not_detect	Not_detect	Not_detect	Not_detect
NC_017022.1	terminator_00438	1264791	1264838	+	gene_converged;TransTermHP	EFAU004_RS06110	NA	FALSE	Not_detect	Not_detect	Not_detect	Not_detect	Not_detect	Not_detect
NC_017022.1	terminator_00439	1266804	1266818	-	TransTermHP	EFAU004_RS06125	NA	FALSE	Not_detect	Not_detect	Not_detect	Not_detect	Not_detect	Not_detect
NC_017022.1	terminator_00440	1266895	1266935	+	gene_converged;TransTermHP	EFAU004_RS06120	NA	FALSE	Not_detect	Not_detect	Not_detect	Not_detect	Not_detect	Not_detect
NC_017022.1	terminator_00441	1270207	1270263	-	TransTermHP	EFAU004_RS15310	NA	FALSE	Not_detect	Not_detect	Not_detect	Not_detect	Not_detect	Not_detect
NC_017022.1	terminator_00442	1270456	1270515	+	gene_converged	EFAU004_RS06140	NA	FALSE	Not_detect	Not_detect	Not_detect	Not_detect	Not_detect	Not_detect
NC_017022.1	terminator_00443	1274321	1274360	-	gene_converged;TransTermHP	EFAU004_RS06160	NA	FALSE	Not_detect	Not_detect	Not_detect	Not_detect	Not_detect	Not_detect
NC_017022.1	terminator_00444	1275216	1275246	-	TransTermHP	EFAU004_RS06165	NA	FALSE	Not_detect	Not_detect	Not_detect	Not_detect	Not_detect	Not_detect
NC_017022.1	terminator_00445	1279949	1279979	-	TransTermHP	EFAU004_RS06175	NA	FALSE	Not_detect	Not_detect	Not_detect	Not_detect	Not_detect	Not_detect
NC_017022.1	terminator_00446	1281930	1281947	+	TransTermHP	EFAU004_RS06180	NA	FALSE	Not_detect	Not_detect	Not_detect	Not_detect	Not_detect	Not_detect
NC_017022.1	terminator_00447	1282502	1282543	+	gene_converged;TransTermHP	EFAU004_RS06185	NA	FALSE	Not_detect	Not_detect	Not_detect	Not_detect	Not_detect	Not_detect
NC_017022.1	terminator_00448	1282504	1282540	-	gene_converged;TransTermHP	EFAU004_RS06190	NA	FALSE	Not_detect	Not_detect	Not_detect	Not_detect	Not_detect	Not_detect
NC_017022.1	terminator_00449	1284297	1284307	-	TransTermHP	EFAU004_RS06205	NA	FALSE	Not_detect	Not_detect	Not_detect	Not_detect	Not_detect	Not_detect
NC_017022.1	terminator_00450	1287162	1287191	+	TransTermHP	EFAU004_RS06210	NC_017022.1_transcript1155	FALSE	Not_detect	Not_detect	Not_detect	Not_detect	Not_detect	Not_detect
NC_017022.1	terminator_00451	1287619	1287631	-	TransTermHP	EFAU004_RS06220	NA	FALSE	Not_detect	Not_detect	Not_detect	Not_detect	Not_detect	Not_detect
NC_017022.1	terminator_00452	1288170	1288187	+	TransTermHP	EFAU004_RS06215	NA	FALSE	Not_detect	Not_detect	Not_detect	Not_detect	Not_detect	Not_detect
NC_017022.1	terminator_00453	1289847	1289857	-	TransTermHP	EFAU004_RS06235	NA	FALSE	Not_detect	Not_detect	Not_detect	Not_detect	Not_detect	Not_detect
NC_017022.1	terminator_00454	1290837	1290853	-	TransTermHP	EFAU004_RS06240	NA	FALSE	Not_detect	Not_detect	Not_detect	Not_detect	Not_detect	Not_detect
NC_017022.1	terminator_00455	1294758	1294781	+	TransTermHP	EFAU004_RS06255	NA	FALSE	Not_detect	Not_detect	Not_detect	Not_detect	Not_detect	Not_detect
NC_017022.1	terminator_00456	1300430	1300485	+	gene_converged;TransTermHP	EFAU004_RS06285	NA	FALSE	Not_detect	Not_detect	Not_detect	Not_detect	Not_detect	Not_detect
NC_017022.1	terminator_00457	1301113	1301138	-	TransTermHP	araD	NA	FALSE	Not_detect	Not_detect	Not_detect	Not_detect	Not_detect	Not_detect
NC_017022.1	terminator_00458	1307836	1307872	-	gene_converged	EFAU004_RS06335	NA	FALSE	Not_detect	Not_detect	Not_detect	Not_detect	Not_detect	Not_detect
NC_017022.1	terminator_00459	1307983	1308021	+	gene_converged;TransTermHP	EFAU004_RS06330	NA	FALSE	Not_detect	Not_detect	Not_detect	Not_detect	Not_detect	Not_detect
NC_017022.1	terminator_00460	1310559	1310575	-	TransTermHP	EFAU004_RS15320	NA	FALSE	Not_detect	Not_detect	Not_detect	Not_detect	Not_detect	Not_detect
NC_017022.1	terminator_00461	1310873	1310903	+	gene_converged;TransTermHP	EFAU004_RS06340	NA	FALSE	Not_detect	Not_detect	Not_detect	Not_detect	Not_detect	Not_detect
NC_017022.1	terminator_00462	1311504	1311532	-	TransTermHP	EFAU004_RS06345	NA	FALSE	Not_detect	Not_detect	Not_detect	Not_detect	Not_detect	Not_detect
NC_017022.1	terminator_00463	1311976	1311994	-	TransTermHP	EFAU004_RS06350	NA	FALSE	Not_detect	Not_detect	Not_detect	Not_detect	Not_detect	Not_detect
NC_017022.1	terminator_00464	1313308	1313348	-	TransTermHP	EFAU004_RS06355	NA	FALSE	Not_detect	Not_detect	Not_detect	Not_detect	Not_detect	Not_detect
NC_017022.1	terminator_00465	1317610	1317664	-	TransTermHP	EFAU004_RS06375	NA	FALSE	Not_detect	Not_detect	Not_detect	Not_detect	Not_detect	Not_detect
NC_017022.1	terminator_00466	1323927	1323945	+	TransTermHP	EFAU004_RS14815	NA	FALSE	Not_detect	Not_detect	Not_detect	Not_detect	Not_detect	Not_detect
NC_017022.1	terminator_00467	1326045	1326068	-	TransTermHP	EFAU004_RS06470	NA	FALSE	Not_detect	Not_detect	Not_detect	Not_detect	Not_detect	Not_detect
NC_017022.1	terminator_00468	1333784	1333795	-	TransTermHP	EFAU004_RS06505	NC_017022.1_transcript1183	FALSE	Not_detect	Not_detect	Not_detect	Not_detect	Not_detect	Not_detect
NC_017022.1	terminator_00469	1338681	1338728	-	gene_converged;TransTermHP	EFAU004_RS06520	NA	FALSE	Not_detect	Not_detect	Not_detect	Not_detect	Not_detect	Not_detect
NC_017022.1	terminator_00470	1340070	1340098	-	TransTermHP	EFAU004_RS06525	NA	FALSE	Not_detect	Not_detect	Not_detect	Not_detect	Not_detect	Not_detect
NC_017022.1	terminator_00471	1344121	1344159	-	gene_converged;TransTermHP	EFAU004_RS06540	NA	FALSE	Not_detect	Not_detect	Not_detect	Not_detect	Not_detect	Not_detect
NC_017022.1	terminator_00472	1344125	1344153	+	gene_converged;TransTermHP	EFAU004_RS06535	NA	FALSE	Not_detect	Not_detect	Not_detect	Not_detect	Not_detect	Not_detect
NC_017022.1	terminator_00473	1346545	1346560	-	TransTermHP	EFAU004_RS06545	NA	FALSE	Not_detect	Not_detect	Not_detect	Not_detect	Not_detect	Not_detect
NC_017022.1	terminator_00474	1347743	1347755	-	TransTermHP	EFAU004_RS06550	NA	FALSE	Not_detect	Not_detect	Not_detect	Not_detect	Not_detect	Not_detect
NC_017022.1	terminator_00475	1350542	1350553	+	TransTermHP	EFAU004_RS15325	NA	FALSE	Not_detect	Not_detect	Not_detect	Not_detect	Not_detect	Not_detect
NC_017022.1	terminator_00476	1354743	1354793	+	gene_converged;TransTermHP	EFAU004_RS06565	NC_017022.1_transcript1199	FALSE	Not_detect	Not_detect	Not_detect	Not_detect	Not_detect	Not_detect
NC_017022.1	terminator_00477	1354745	1354791	-	gene_converged;TransTermHP	EFAU004_RS06570	NA	FALSE	Not_detect	Not_detect	Not_detect	Not_detect	Not_detect	Not_detect
NC_017022.1	terminator_00478	1355592	1355622	-	TransTermHP	EFAU004_RS06575	NA	FALSE	Not_detect	Not_detect	Not_detect	Not_detect	Not_detect	Not_detect
NC_017022.1	terminator_00479	1381327	1381367	-	gene_converged;TransTermHP	EFAU004_RS06720	NA	FALSE	Not_detect	Not_detect	Not_detect	Not_detect	Not_detect	Not_detect
NC_017022.1	terminator_00480	1381412	1381463	+	gene_converged;TransTermHP	EFAU004_RS06715	NA	FALSE	Not_detect	Not_detect	Not_detect	Not_detect	Not_detect	Not_detect
NC_017022.1	terminator_00481	1381823	1381851	-	TransTermHP	EFAU004_RS06725	NA	FALSE	Not_detect	Not_detect	Not_detect	Not_detect	Not_detect	Not_detect
NC_017022.1	terminator_00482	1383857	1383888	-	TransTermHP	EFAU004_RS06730	NA	FALSE	Not_detect	Not_detect	Not_detect	Not_detect	Not_detect	Not_detect
NC_017022.1	terminator_00483	1385326	1385357	-	gene_converged;TransTermHP	EFAU004_RS06735	NA	FALSE	Not_detect	Not_detect	Not_detect	Not_detect	Not_detect	Not_detect
NC_017022.1	terminator_00484	1387784	1387798	-	TransTermHP	EFAU004_RS06750	NA	FALSE	Not_detect	Not_detect	Not_detect	Not_detect	Not_detect	Not_detect
NC_017022.1	terminator_00485	1391308	1391339	-	gene_converged	EFAU004_RS06765	NA	FALSE	Not_detect	Not_detect	Not_detect	Not_detect	Not_detect	Not_detect
NC_017022.1	terminator_00486	1391398	1391441	+	gene_converged;TransTermHP	EFAU004_RS06760	NA	FALSE	Not_detect	Not_detect	Not_detect	Not_detect	Not_detect	Not_detect
NC_017022.1	terminator_00487	1392782	1392806	+	gene_converged	EFAU004_RS06770	NC_017022.1_transcript1229	FALSE	Not_detect	Not_detect	Not_detect	Not_detect	Not_detect	Not_detect
NC_017022.1	terminator_00488	1395123	1395148	-	TransTermHP	EFAU004_RS06785	NC_017022.1_transcript1232	FALSE	Not_detect	Not_detect	Not_detect	Not_detect	Not_detect	Not_detect
NC_017022.1	terminator_00489	1395851	1395909	-	TransTermHP	EFAU004_RS06790	NC_017022.1_transcript1233	FALSE	Not_detect	Not_detect	Not_detect	Not_detect	Not_detect	Not_detect
NC_017022.1	terminator_00490	1398354	1398383	+	TransTermHP	EFAU004_RS06800	NA	FALSE	Not_detect	Not_detect	Not_detect	Not_detect	Not_detect	Not_detect
NC_017022.1	terminator_00491	1400571	1400600	-	TransTermHP	EFAU004_RS06820	NA	FALSE	Not_detect	Not_detect	Not_detect	Not_detect	Not_detect	Not_detect
NC_017022.1	terminator_00492	1403748	1403785	-	TransTermHP	EFAU004_RS06840	NC_017022.1_transcript1240	FALSE	Not_detect	Not_detect	Not_detect	Not_detect	Not_detect	Not_detect
NC_017022.1	terminator_00493	1406529	1406557	+	gene_converged;TransTermHP	EFAU004_RS06845	NA	FALSE	Not_detect	Not_detect	Not_detect	Not_detect	Not_detect	Not_detect
NC_017022.1	terminator_00494	1406520	1406565	-	gene_converged;TransTermHP	EFAU004_RS06850	NA	FALSE	Not_detect	Not_detect	Not_detect	Not_detect	Not_detect	Not_detect
NC_017022.1	terminator_00495	1409235	1409249	-	TransTermHP	EFAU004_RS06860	NA	FALSE	Not_detect	Not_detect	Not_detect	Not_detect	Not_detect	Not_detect
NC_017022.1	terminator_00496	1409674	1409686	+	TransTermHP	EFAU004_RS06855	NA	FALSE	Not_detect	Not_detect	Not_detect	Not_detect	Not_detect	Not_detect
NC_017022.1	terminator_00497	1410765	1410789	+	TransTermHP	EFAU004_RS06865	NA	FALSE	Not_detect	Not_detect	Not_detect	Not_detect	Not_detect	Not_detect
NC_017022.1	terminator_00498	1412167	1412205	-	gene_converged;TransTermHP	EFAU004_RS06875	NA	FALSE	Not_detect	Not_detect	Not_detect	Not_detect	Not_detect	Not_detect
NC_017022.1	terminator_00499	1412171	1412199	+	gene_converged;TransTermHP	EFAU004_RS06870	NA	FALSE	Not_detect	Not_detect	Not_detect	Not_detect	Not_detect	Not_detect
NC_017022.1	terminator_00500	1420913	1420928	-	TransTermHP	EFAU004_RS06920	NC_017022.1_transcript1250	FALSE	Not_detect	Not_detect	Not_detect	Not_detect	Not_detect	Not_detect
NC_017022.1	terminator_00501	1424181	1424205	-	gene_converged	EFAU004_RS15350	NC_017022.1_transcript1250	FALSE	Not_detect	Not_detect	Not_detect	Not_detect	Not_detect	Not_detect
NC_017022.1	terminator_00502	1430992	1431012	+	gene_converged	EFAU004_RS06960	NA	FALSE	Not_detect	Not_detect	Not_detect	Not_detect	Not_detect	Not_detect
NC_017022.1	terminator_00503	1430814	1430837	-	gene_converged	EFAU004_RS06965	NA	FALSE	Not_detect	Not_detect	Not_detect	Not_detect	Not_detect	Not_detect
NC_017022.1	terminator_00504	1436071	1436083	-	TransTermHP	EFAU004_RS06980	NC_017022.1_transcript1257	FALSE	Not_detect	Not_detect	Not_detect	Not_detect	Not_detect	Not_detect
NC_017022.1	terminator_00505	1440450	1440464	-	TransTermHP	EFAU004_RS06995	NC_017022.1_transcript1259	FALSE	Not_detect	Not_detect	Not_detect	Not_detect	Not_detect	Not_detect
NC_017022.1	terminator_00506	1441352	1441380	-	gene_converged;TransTermHP	EFAU004_RS07000	NC_017022.1_transcript1259	FALSE	Not_detect	Not_detect	Not_detect	Not_detect	Not_detect	Not_detect
NC_017022.1	terminator_00507	1442351	1442372	-	gene_converged	EFAU004_RS07005	NC_017022.1_transcript1262	FALSE	Not_detect	Not_detect	Not_detect	Not_detect	Not_detect	Not_detect
NC_017022.1	terminator_00508	1445549	1445567	-	TransTermHP	EFAU004_RS07025	NC_017022.1_transcript1262	FALSE	Not_detect	Not_detect	Not_detect	Not_detect	Not_detect	Not_detect
NC_017022.1	terminator_00509	1447518	1447532	-	TransTermHP	EFAU004_RS07035	NA	FALSE	Not_detect	Not_detect	Not_detect	Not_detect	Not_detect	Not_detect
NC_017022.1	terminator_00510	1449896	1449943	-	gene_converged;TransTermHP	EFAU004_RS07050	NA	FALSE	Not_detect	Not_detect	Not_detect	Not_detect	Not_detect	Not_detect
NC_017022.1	terminator_00511	1449993	1450016	+	gene_converged	EFAU004_RS07045	NA	FALSE	Not_detect	Not_detect	Not_detect	Not_detect	Not_detect	Not_detect
NC_017022.1	terminator_00512	1452197	1452235	+	gene_converged;TransTermHP	EFAU004_RS07055	NA	FALSE	Not_detect	Not_detect	Not_detect	Not_detect	Not_detect	Not_detect
NC_017022.1	terminator_00513	1452203	1452231	-	gene_converged;TransTermHP	EFAU004_RS07060	NA	FALSE	Not_detect	Not_detect	Not_detect	Not_detect	Not_detect	Not_detect
NC_017022.1	terminator_00514	1454137	1454162	+	TransTermHP	EFAU004_RS15355	NA	FALSE	Not_detect	Not_detect	Not_detect	Not_detect	Not_detect	Not_detect
NC_017022.1	terminator_00515	1454696	1454741	+	TransTermHP	EFAU004_RS07065	NA	FALSE	Not_detect	Not_detect	Not_detect	Not_detect	Not_detect	Not_detect
NC_017022.1	terminator_00516	1458859	1458888	-	TransTermHP	EFAU004_RS07105	NA	FALSE	Not_detect	Not_detect	Not_detect	Not_detect	Not_detect	Not_detect
NC_017022.1	terminator_00517	1460515	1460534	-	TransTermHP	EFAU004_RS15360	NA	FALSE	Not_detect	Not_detect	Not_detect	Not_detect	Not_detect	Not_detect
NC_017022.1	terminator_00518	1463335	1463360	-	TransTermHP	EFAU004_RS07130	NA	FALSE	Not_detect	Not_detect	Not_detect	Not_detect	Not_detect	Not_detect
NC_017022.1	terminator_00519	1465465	1465502	-	gene_converged	EFAU004_RS07135	NA	FALSE	Not_detect	Not_detect	Not_detect	Not_detect	Not_detect	Not_detect
NC_017022.1	terminator_00520	1466446	1466464	-	TransTermHP	EFAU004_RS07140	NA	FALSE	Not_detect	Not_detect	Not_detect	Not_detect	Not_detect	Not_detect
NC_017022.1	terminator_00521	1476438	1476450	-	TransTermHP	EFAU004_RS07200	NA	FALSE	Not_detect	Not_detect	Not_detect	Not_detect	Not_detect	Not_detect
NC_017022.1	terminator_00522	1479376	1479394	-	TransTermHP	EFAU004_RS15365	NA	FALSE	Not_detect	Not_detect	Not_detect	Not_detect	Not_detect	Not_detect
NC_017022.1	terminator_00523	1480668	1480696	+	gene_converged	EFAU004_RS07225	NA	FALSE	Not_detect	Not_detect	Not_detect	Not_detect	Not_detect	Not_detect
NC_017022.1	terminator_00524	1480675	1480697	-	gene_converged	EFAU004_RS07230	NA	FALSE	Not_detect	Not_detect	Not_detect	Not_detect	Not_detect	Not_detect
NC_017022.1	terminator_00525	1481402	1481417	-	TransTermHP	EFAU004_RS07235	NA	FALSE	Not_detect	Not_detect	Not_detect	Not_detect	Not_detect	Not_detect
NC_017022.1	terminator_00526	1484049	1484086	-	TransTermHP	EFAU004_RS07275	NA	FALSE	Not_detect	Not_detect	Not_detect	Not_detect	Not_detect	Not_detect
NC_017022.1	terminator_00527	1488243	1488257	-	TransTermHP	EFAU004_RS07310	NA	FALSE	Not_detect	Not_detect	Not_detect	Not_detect	Not_detect	Not_detect
NC_017022.1	terminator_00528	1488380	1488398	+	TransTermHP	EFAU004_RS07305	NA	FALSE	Not_detect	Not_detect	Not_detect	Not_detect	Not_detect	Not_detect
NC_017022.1	terminator_00529	1491009	1491028	+	TransTermHP	EFAU004_RS07335	NA	FALSE	Not_detect	Not_detect	Not_detect	Not_detect	Not_detect	Not_detect
NC_017022.1	terminator_00530	1492234	1492244	+	TransTermHP	EFAU004_RS07345	NC_017022.1_transcript1310	FALSE	Not_detect	Not_detect	Not_detect	Not_detect	Not_detect	Not_detect
NC_017022.1	terminator_00531	1493054	1493065	+	TransTermHP	EFAU004_RS07350	NA	FALSE	Not_detect	Not_detect	Not_detect	Not_detect	Not_detect	Not_detect
NC_017022.1	terminator_00532	1494435	1494471	+	gene_converged;TransTermHP	EFAU004_RS07355	NA	FALSE	Not_detect	Not_detect	Not_detect	Not_detect	Not_detect	Not_detect
NC_017022.1	terminator_00533	1497807	1497860	+	TransTermHP	EFAU004_RS07385	NA	FALSE	Not_detect	Not_detect	Not_detect	Not_detect	Not_detect	Not_detect
NC_017022.1	terminator_00534	1498813	1498835	-	gene_converged	EFAU004_RS07395	NA	FALSE	Not_detect	Not_detect	Not_detect	Not_detect	Not_detect	Not_detect
NC_017022.1	terminator_00535	1498855	1498896	+	gene_converged;TransTermHP	EFAU004_RS07390	NA	FALSE	Not_detect	Not_detect	Not_detect	Not_detect	Not_detect	Not_detect
NC_017022.1	terminator_00536	1501017	1501041	-	TransTermHP	EFAU004_RS07415	NA	FALSE	Not_detect	Not_detect	Not_detect	Not_detect	Not_detect	Not_detect
NC_017022.1	terminator_00537	1501961	1501972	-	TransTermHP	EFAU004_RS07420	NA	FALSE	Not_detect	Not_detect	Not_detect	Not_detect	Not_detect	Not_detect
NC_017022.1	terminator_00538	1506819	1506871	-	gene_converged	EFAU004_RS07450	NA	FALSE	Not_detect	Not_detect	Not_detect	Not_detect	Not_detect	Not_detect
NC_017022.1	terminator_00539	1507083	1507134	+	TransTermHP	EFAU004_RS07445	NA	FALSE	Not_detect	Not_detect	Not_detect	Not_detect	Not_detect	Not_detect
NC_017022.1	terminator_00540	1508494	1508509	+	TransTermHP	EFAU004_RS07465	NC_017022.1_transcript1334	FALSE	Not_detect	Not_detect	Not_detect	Not_detect	Not_detect	Not_detect
NC_017022.1	terminator_00541	1509211	1509226	+	TransTermHP	EFAU004_RS07470	NA	FALSE	Not_detect	Not_detect	Not_detect	Not_detect	Not_detect	Not_detect
NC_017022.1	terminator_00542	1511496	1511540	-	gene_converged	EFAU004_RS07485	NA	FALSE	Not_detect	Not_detect	Not_detect	Not_detect	Not_detect	Not_detect
NC_017022.1	terminator_00543	1511555	1511588	+	gene_converged	EFAU004_RS07480	NA	FALSE	Not_detect	Not_detect	Not_detect	Not_detect	Not_detect	Not_detect
NC_017022.1	terminator_00544	1512565	1512593	-	TransTermHP	EFAU004_RS07495	NA	FALSE	Not_detect	Not_detect	Not_detect	Not_detect	Not_detect	Not_detect
NC_017022.1	terminator_00545	1515250	1515260	-	TransTermHP	EFAU004_RS07515	NA	FALSE	Not_detect	Not_detect	Not_detect	Not_detect	Not_detect	Not_detect
NC_017022.1	terminator_00546	1515777	1515791	-	TransTermHP	EFAU004_RS07520	NA	FALSE	Not_detect	Not_detect	Not_detect	Not_detect	Not_detect	Not_detect
NC_017022.1	terminator_00547	1522094	1522140	+	gene_converged;TransTermHP	EFAU004_RS07555	NA	FALSE	Not_detect	Not_detect	Not_detect	Not_detect	Not_detect	Not_detect
NC_017022.1	terminator_00548	1522975	1522998	-	gene_converged	EFAU004_RS07565	NA	FALSE	Not_detect	Not_detect	Not_detect	Not_detect	Not_detect	Not_detect
NC_017022.1	terminator_00549	1523262	1523272	+	TransTermHP	EFAU004_RS07560	NA	FALSE	Not_detect	Not_detect	Not_detect	Not_detect	Not_detect	Not_detect
NC_017022.1	terminator_00550	1526146	1526185	-	gene_converged;TransTermHP	transcript_01347,EFAU004_RS07575	NC_017022.1_transcript1347	FALSE	Not_detect	Not_detect	Not_detect	Not_detect	Not_detect	Not_detect
NC_017022.1	terminator_00551	1527231	1527261	-	TransTermHP	EFAU004_RS07585	NA	FALSE	Not_detect	Not_detect	Not_detect	Not_detect	Not_detect	Not_detect
NC_017022.1	terminator_00552	1527358	1527368	+	TransTermHP	EFAU004_RS07580	NA	FALSE	Not_detect	Not_detect	Not_detect	Not_detect	Not_detect	Not_detect
NC_017022.1	terminator_00553	1529047	1529070	-	TransTermHP	EFAU004_RS07595	NA	FALSE	Not_detect	Not_detect	Not_detect	Not_detect	Not_detect	Not_detect
NC_017022.1	terminator_00554	1530014	1530033	-	gene_converged	EFAU004_RS07600	NA	FALSE	Not_detect	Not_detect	Not_detect	Not_detect	Not_detect	Not_detect
NC_017022.1	terminator_00555	1532354	1532374	+	gene_converged	EFAU004_RS07605	NA	FALSE	Not_detect	Not_detect	Not_detect	Not_detect	Not_detect	Not_detect
NC_017022.1	terminator_00556	1532595	1532620	-	gene_converged	EFAU004_RS07610	NA	FALSE	Not_detect	Not_detect	Not_detect	Not_detect	Not_detect	Not_detect
NC_017022.1	terminator_00557	1535594	1535620	+	TransTermHP	EFAU004_RS07620	NA	FALSE	Not_detect	Not_detect	Not_detect	Not_detect	Not_detect	Not_detect
NC_017022.1	terminator_00558	1539330	1539368	-	gene_converged	EFAU004_RS07645	NA	FALSE	Not_detect	Not_detect	Not_detect	Not_detect	Not_detect	Not_detect
NC_017022.1	terminator_00559	1540907	1540926	+	TransTermHP	EFAU004_RS07650	NA	FALSE	Not_detect	Not_detect	Not_detect	Not_detect	Not_detect	Not_detect
NC_017022.1	terminator_00560	1541730	1541753	+	TransTermHP	EFAU004_RS07655	NA	FALSE	Not_detect	Not_detect	Not_detect	Not_detect	Not_detect	Not_detect
NC_017022.1	terminator_00561	1543194	1543226	+	TransTermHP	EFAU004_RS07665	NA	FALSE	Not_detect	Not_detect	Not_detect	Not_detect	Not_detect	Not_detect
NC_017022.1	terminator_00562	1544318	1544330	-	TransTermHP	EFAU004_RS07675	NA	FALSE	Not_detect	Not_detect	Not_detect	Not_detect	Not_detect	Not_detect
NC_017022.1	terminator_00563	1546928	1546952	+	gene_converged;TransTermHP	EFAU004_RS07680	NA	FALSE	Not_detect	Not_detect	Not_detect	Not_detect	Not_detect	Not_detect
NC_017022.1	terminator_00564	1546903	1546923	-	TransTermHP	EFAU004_RS07685	NA	FALSE	Not_detect	Not_detect	Not_detect	Not_detect	Not_detect	Not_detect
NC_017022.1	terminator_00565	1551442	1551487	+	gene_converged;TransTermHP	EFAU004_RS07700	NA	FALSE	Not_detect	Not_detect	Not_detect	Not_detect	Not_detect	Not_detect
NC_017022.1	terminator_00566	1551444	1551486	-	gene_converged;TransTermHP	EFAU004_RS07705	NA	FALSE	Not_detect	Not_detect	Not_detect	Not_detect	Not_detect	Not_detect
NC_017022.1	terminator_00567	1563617	1563652	-	TransTermHP	EFAU004_RS07760	NA	FALSE	Not_detect	Not_detect	Not_detect	Not_detect	Not_detect	Not_detect
NC_017022.1	terminator_00568	1571182	1571200	-	TransTermHP	EFAU004_RS07795	NA	FALSE	Not_detect	Not_detect	Not_detect	Not_detect	Not_detect	Not_detect
NC_017022.1	terminator_00569	1574576	1574599	-	gene_converged	EFAU004_RS07810	NC_017022.1_transcript1382	FALSE	Not_detect	Not_detect	Not_detect	Not_detect	Not_detect	Not_detect
NC_017022.1	terminator_00570	1576715	1576751	-	TransTermHP	EFAU004_RS07820	NA	FALSE	Not_detect	Not_detect	Not_detect	Not_detect	Not_detect	Not_detect
NC_017022.1	terminator_00571	1579766	1579786	-	TransTermHP	EFAU004_RS07835	NC_017022.1_transcript1390	FALSE	Not_detect	Not_detect	Not_detect	Not_detect	Not_detect	Not_detect
NC_017022.1	terminator_00572	1582440	1582482	-	TransTermHP	EFAU004_RS07855	NA	FALSE	Not_detect	Not_detect	Not_detect	Not_detect	Not_detect	Not_detect
NC_017022.1	terminator_00573	1584396	1584407	-	TransTermHP	EFAU004_RS07870	NA	FALSE	Not_detect	Not_detect	Not_detect	Not_detect	Not_detect	Not_detect
NC_017022.1	terminator_00574	1586319	1586363	-	TransTermHP	EFAU004_RS07880	NA	FALSE	Not_detect	Not_detect	Not_detect	Not_detect	Not_detect	Not_detect
NC_017022.1	terminator_00575	1591131	1591147	-	TransTermHP	EFAU004_RS07900	NC_017022.1_transcript1397	FALSE	Not_detect	Not_detect	Not_detect	Not_detect	Not_detect	Not_detect
NC_017022.1	terminator_00576	1591525	1591544	+	TransTermHP	EFAU004_RS07895	NA	FALSE	Not_detect	Not_detect	Not_detect	Not_detect	Not_detect	Not_detect
NC_017022.1	terminator_00577	1594948	1594972	-	gene_converged	EFAU004_RS07920	NC_017022.1_transcript1398	FALSE	Not_detect	Not_detect	Not_detect	Not_detect	Not_detect	Not_detect
NC_017022.1	terminator_00578	1598915	1598936	+	gene_converged;TransTermHP	EFAU004_RS15385	NA	FALSE	Not_detect	Not_detect	Not_detect	Not_detect	Not_detect	Not_detect
NC_017022.1	terminator_00579	1598979	1599004	-	gene_converged	EFAU004_RS07935	NA	FALSE	Not_detect	Not_detect	Not_detect	Not_detect	Not_detect	Not_detect
NC_017022.1	terminator_00580	1605210	1605267	-	TransTermHP	EFAU004_RS07955	NA	FALSE	Not_detect	Not_detect	Not_detect	Not_detect	Not_detect	Not_detect
NC_017022.1	terminator_00581	1606838	1606870	-	TransTermHP	EFAU004_RS07965	NA	FALSE	Not_detect	Not_detect	Not_detect	Not_detect	Not_detect	Not_detect
NC_017022.1	terminator_00582	1607305	1607330	-	TransTermHP	EFAU004_RS07970	NA	FALSE	Not_detect	Not_detect	Not_detect	Not_detect	Not_detect	Not_detect
NC_017022.1	terminator_00583	1608904	1608929	-	TransTermHP	EFAU004_RS07980	NA	FALSE	Not_detect	Not_detect	Not_detect	Not_detect	Not_detect	Not_detect
NC_017022.1	terminator_00584	1617149	1617159	-	TransTermHP	EFAU004_RS08025	NA	FALSE	Not_detect	Not_detect	Not_detect	Not_detect	Not_detect	Not_detect
NC_017022.1	terminator_00585	1617621	1617662	-	TransTermHP	EFAU004_RS08030	NA	FALSE	Not_detect	Not_detect	Not_detect	Not_detect	Not_detect	Not_detect
NC_017022.1	terminator_00586	1619654	1619677	-	TransTermHP	EFAU004_RS08040	NA	FALSE	Not_detect	Not_detect	Not_detect	Not_detect	Not_detect	Not_detect
NC_017022.1	terminator_00587	1629357	1629389	-	TransTermHP	EFAU004_RS08070	NA	FALSE	Not_detect	Not_detect	Not_detect	Not_detect	Not_detect	Not_detect
NC_017022.1	terminator_00588	1635125	1635136	-	TransTermHP	EFAU004_RS08115	NA	FALSE	Not_detect	Not_detect	Not_detect	Not_detect	Not_detect	Not_detect
NC_017022.1	terminator_00589	1637269	1637317	-	gene_converged	EFAU004_RS08125	NC_017022.1_transcript1419	FALSE	Not_detect	Not_detect	Not_detect	Not_detect	Not_detect	Not_detect
NC_017022.1	terminator_00590	1638198	1638209	-	TransTermHP	EFAU004_RS08135	NA	FALSE	Not_detect	Not_detect	Not_detect	Not_detect	Not_detect	Not_detect
NC_017022.1	terminator_00591	1645231	1645248	-	TransTermHP	EFAU004_RS15390	NA	FALSE	Not_detect	Not_detect	Not_detect	Not_detect	Not_detect	Not_detect
NC_017022.1	terminator_00592	1645721	1645746	-	TransTermHP	EFAU004_RS08180	NA	FALSE	Not_detect	Not_detect	Not_detect	Not_detect	Not_detect	Not_detect
NC_017022.1	terminator_00593	1648024	1648034	-	TransTermHP	EFAU004_RS08195	NA	FALSE	Not_detect	Not_detect	Not_detect	Not_detect	Not_detect	Not_detect
NC_017022.1	terminator_00594	1654509	1654539	+	TransTermHP	EFAU004_RS08240	NA	FALSE	Not_detect	Not_detect	Not_detect	Not_detect	Not_detect	Not_detect
NC_017022.1	terminator_00595	1656551	1656588	-	gene_converged;TransTermHP	EFAU004_RS08250	NA	FALSE	Not_detect	Not_detect	Not_detect	Not_detect	Not_detect	Not_detect
NC_017022.1	terminator_00596	1656554	1656588	+	TransTermHP	EFAU004_RS08245	NA	FALSE	Not_detect	Not_detect	Not_detect	Not_detect	Not_detect	Not_detect
NC_017022.1	terminator_00597	1657522	1657560	-	TransTermHP	EFAU004_RS08255	NA	FALSE	Not_detect	Not_detect	Not_detect	Not_detect	Not_detect	Not_detect
NC_017022.1	terminator_00598	1661526	1661536	-	TransTermHP	EFAU004_RS08280	NC_017022.1_transcript1425	FALSE	Not_detect	Not_detect	Not_detect	Not_detect	Not_detect	Not_detect
NC_017022.1	terminator_00599	1664166	1664209	-	TransTermHP	EFAU004_RS08295	NA	FALSE	Not_detect	Not_detect	Not_detect	Not_detect	Not_detect	Not_detect
NC_017022.1	terminator_00600	1676168	1676211	-	gene_converged;TransTermHP	EFAU004_RS08335	NA	FALSE	Not_detect	Not_detect	Not_detect	Not_detect	Not_detect	Not_detect
NC_017022.1	terminator_00601	1676170	1676214	+	gene_converged;TransTermHP	EFAU004_RS08330	NA	FALSE	Not_detect	Not_detect	Not_detect	Not_detect	Not_detect	Not_detect
NC_017022.1	terminator_00602	1679891	1679915	-	gene_converged	EFAU004_RS08350	NA	FALSE	Not_detect	Not_detect	Not_detect	Not_detect	Not_detect	Not_detect
NC_017022.1	terminator_00603	1683921	1683940	-	gene_converged	EFAU004_RS08375	NA	FALSE	Not_detect	Not_detect	Not_detect	Not_detect	Not_detect	Not_detect
NC_017022.1	terminator_00604	1699394	1699432	-	gene_converged;TransTermHP	EFAU004_RS08430	NA	FALSE	Not_detect	Not_detect	Not_detect	Not_detect	Not_detect	Not_detect
NC_017022.1	terminator_00605	1699396	1699431	+	TransTermHP	EFAU004_RS08425	NA	FALSE	Not_detect	Not_detect	Not_detect	Not_detect	Not_detect	Not_detect
NC_017022.1	terminator_00606	1700280	1700317	-	TransTermHP	EFAU004_RS08435	NA	FALSE	Not_detect	Not_detect	Not_detect	Not_detect	Not_detect	Not_detect
NC_017022.1	terminator_00607	1701763	1701802	-	TransTermHP	EFAU004_RS08445	NA	FALSE	Not_detect	Not_detect	Not_detect	Not_detect	Not_detect	Not_detect
NC_017022.1	terminator_00608	1703755	1703767	-	TransTermHP	EFAU004_RS08460	NA	FALSE	Not_detect	Not_detect	Not_detect	Not_detect	Not_detect	Not_detect
NC_017022.1	terminator_00609	1705903	1705928	-	TransTermHP	EFAU004_RS08475	NA	FALSE	Not_detect	Not_detect	Not_detect	Not_detect	Not_detect	Not_detect
NC_017022.1	terminator_00610	1719400	1719442	-	gene_converged;TransTermHP	EFAU004_RS08525	NA	FALSE	Not_detect	Not_detect	Not_detect	Not_detect	Not_detect	Not_detect
NC_017022.1	terminator_00611	1719403	1719445	+	gene_converged;TransTermHP	EFAU004_RS08520	NA	FALSE	Not_detect	Not_detect	Not_detect	Not_detect	Not_detect	Not_detect
NC_017022.1	terminator_00612	1722676	1722686	-	TransTermHP	EFAU004_RS08535	NC_017022.1_transcript1459	FALSE	Not_detect	Not_detect	Not_detect	Not_detect	Not_detect	Not_detect
NC_017022.1	terminator_00613	1728009	1728048	-	gene_converged;TransTermHP	EFAU004_RS08565	NA	FALSE	Not_detect	Not_detect	Not_detect	Not_detect	Not_detect	Not_detect
NC_017022.1	terminator_00614	1731075	1731130	-	gene_converged;TransTermHP	EFAU004_RS08585	NA	FALSE	Not_detect	Not_detect	Not_detect	Not_detect	Not_detect	Not_detect
NC_017022.1	terminator_00615	1731082	1731131	+	gene_converged;TransTermHP	EFAU004_RS08580	NC_017022.1_transcript1468	FALSE	Not_detect	Not_detect	Not_detect	Not_detect	Not_detect	Not_detect
NC_017022.1	terminator_00616	1733092	1733118	-	TransTermHP	EFAU004_RS08595	NA	FALSE	Not_detect	Not_detect	Not_detect	Not_detect	Not_detect	Not_detect
NC_017022.1	terminator_00617	1738522	1738573	+	gene_converged;TransTermHP	EFAU004_RS15410	NA	FALSE	Not_detect	Not_detect	Not_detect	Not_detect	Not_detect	Not_detect
NC_017022.1	terminator_00618	1738417	1738458	-	gene_converged	EFAU004_RS08610	NA	FALSE	Not_detect	Not_detect	Not_detect	Not_detect	Not_detect	Not_detect
NC_017022.1	terminator_00619	1743606	1743630	-	TransTermHP	polC	NC_017022.1_transcript1474	FALSE	Not_detect	Not_detect	Not_detect	Not_detect	Not_detect	Not_detect
NC_017022.1	terminator_00620	1753242	1753270	-	TransTermHP	EFAU004_RS08665	NA	FALSE	Not_detect	Not_detect	Not_detect	Not_detect	Not_detect	Not_detect
NC_017022.1	terminator_00621	1759414	1759449	-	gene_converged	EFAU004_RS08705	NA	FALSE	Not_detect	Not_detect	Not_detect	Not_detect	Not_detect	Not_detect
NC_017022.1	terminator_00622	1759531	1759576	+	gene_converged;TransTermHP	EFAU004_RS08700	NA	FALSE	Not_detect	Not_detect	Not_detect	Not_detect	Not_detect	Not_detect
NC_017022.1	terminator_00623	1766731	1766773	-	gene_converged;TransTermHP	EFAU004_RS08730	NA	FALSE	Not_detect	Not_detect	Not_detect	Not_detect	Not_detect	Not_detect
NC_017022.1	terminator_00624	1772454	1772465	-	TransTermHP	EFAU004_RS08760	NC_017022.1_transcript1492	FALSE	Not_detect	Not_detect	Not_detect	Not_detect	Not_detect	Not_detect
NC_017022.1	terminator_00625	1773855	1773909	-	gene_converged;TransTermHP	EFAU004_RS08770	NA	FALSE	Not_detect	Not_detect	Not_detect	Not_detect	Not_detect	Not_detect
NC_017022.1	terminator_00626	1779203	1779227	-	TransTermHP	EFAU004_RS08805	NA	FALSE	Not_detect	Not_detect	Not_detect	Not_detect	Not_detect	Not_detect
NC_017022.1	terminator_00627	1783163	1783214	-	gene_converged;TransTermHP	EFAU004_RS08825	NA	FALSE	Not_detect	Not_detect	Not_detect	Not_detect	Not_detect	Not_detect
NC_017022.1	terminator_00628	1783166	1783213	+	gene_converged;TransTermHP	EFAU004_RS08820	NC_017022.1_transcript1501	FALSE	Not_detect	Not_detect	Not_detect	Not_detect	Not_detect	Not_detect
NC_017022.1	terminator_00629	1786277	1786299	+	gene_converged	EFAU004_RS08840	NA	FALSE	Not_detect	Not_detect	Not_detect	Not_detect	Not_detect	Not_detect
NC_017022.1	terminator_00630	1788518	1788539	-	TransTermHP	EFAU004_RS08850	NC_017022.1_transcript1508	FALSE	Not_detect	Not_detect	Not_detect	Not_detect	Not_detect	Not_detect
NC_017022.1	terminator_00631	1790116	1790145	-	gene_converged	EFAU004_RS08855	NA	FALSE	Not_detect	Not_detect	Not_detect	Not_detect	Not_detect	Not_detect
NC_017022.1	terminator_00632	1792616	1792669	-	TransTermHP	EFAU004_RS08870	NA	FALSE	Not_detect	Not_detect	Not_detect	Not_detect	Not_detect	Not_detect
NC_017022.1	terminator_00633	1795544	1795580	+	TransTermHP	EFAU004_RS08885	NA	FALSE	Not_detect	Not_detect	Not_detect	Not_detect	Not_detect	Not_detect
NC_017022.1	terminator_00634	1797677	1797688	+	TransTermHP	EFAU004_RS08900	NC_017022.1_transcript1521	FALSE	Not_detect	Not_detect	Not_detect	Not_detect	Not_detect	Not_detect
NC_017022.1	terminator_00635	1798417	1798450	+	TransTermHP	EFAU004_RS08905	NA	FALSE	Not_detect	Not_detect	Not_detect	Not_detect	Not_detect	Not_detect
NC_017022.1	terminator_00636	1800336	1800364	+	TransTermHP	EFAU004_RS08910	NA	FALSE	Not_detect	Not_detect	Not_detect	Not_detect	Not_detect	Not_detect
NC_017022.1	terminator_00637	1801443	1801484	-	TransTermHP	EFAU004_RS08925	NA	FALSE	Not_detect	Not_detect	Not_detect	Not_detect	Not_detect	Not_detect
NC_017022.1	terminator_00638	1805880	1805910	+	TransTermHP	EFAU004_RS08940	NA	FALSE	Not_detect	Not_detect	Not_detect	Not_detect	Not_detect	Not_detect
NC_017022.1	terminator_00639	1805734	1805763	-	gene_converged	pgi	NA	FALSE	Not_detect	Not_detect	Not_detect	Not_detect	Not_detect	Not_detect
NC_017022.1	terminator_00640	1807462	1807472	-	TransTermHP	EFAU004_RS08950	NA	FALSE	Not_detect	Not_detect	Not_detect	Not_detect	Not_detect	Not_detect
NC_017022.1	terminator_00641	1810776	1810786	-	TransTermHP	EFAU004_RS08965	NC_017022.1_transcript1537	FALSE	Not_detect	Not_detect	Not_detect	Not_detect	Not_detect	Not_detect
NC_017022.1	terminator_00642	1816547	1816600	+	gene_converged;TransTermHP	EFAU004_RS08985	NA	FALSE	Not_detect	Not_detect	Not_detect	Not_detect	Not_detect	Not_detect
NC_017022.1	terminator_00643	1816548	1816602	-	gene_converged;TransTermHP	EFAU004_RS08990	NA	FALSE	Not_detect	Not_detect	Not_detect	Not_detect	Not_detect	Not_detect
NC_017022.1	terminator_00644	1821817	1821832	-	TransTermHP	EFAU004_RS15435	NA	FALSE	Not_detect	Not_detect	Not_detect	Not_detect	Not_detect	Not_detect
NC_017022.1	terminator_00645	1822207	1822221	+	TransTermHP	EFAU004_RS15430	NA	FALSE	Not_detect	Not_detect	Not_detect	Not_detect	Not_detect	Not_detect
NC_017022.1	terminator_00646	1824482	1824513	-	gene_converged	EFAU004_RS09030	NA	FALSE	Not_detect	Not_detect	Not_detect	Not_detect	Not_detect	Not_detect
NC_017022.1	terminator_00647	1824701	1824757	+	gene_converged;TransTermHP	EFAU004_RS09025	NA	FALSE	Not_detect	Not_detect	Not_detect	Not_detect	Not_detect	Not_detect
NC_017022.1	terminator_00648	1828367	1828398	-	TransTermHP	EFAU004_RS09050	NA	FALSE	Not_detect	Not_detect	Not_detect	Not_detect	Not_detect	Not_detect
NC_017022.1	terminator_00649	1830104	1830139	-	TransTermHP	EFAU004_RS09060	NA	FALSE	Not_detect	Not_detect	Not_detect	Not_detect	Not_detect	Not_detect
NC_017022.1	terminator_00650	1830745	1830763	-	TransTermHP	EFAU004_RS09065	NA	FALSE	Not_detect	Not_detect	Not_detect	Not_detect	Not_detect	Not_detect
NC_017022.1	terminator_00651	1832926	1832972	-	TransTermHP	EFAU004_RS09080	NA	FALSE	Not_detect	Not_detect	Not_detect	Not_detect	Not_detect	Not_detect
NC_017022.1	terminator_00652	1834039	1834066	-	TransTermHP	EFAU004_RS15440	NA	FALSE	Not_detect	Not_detect	Not_detect	Not_detect	Not_detect	Not_detect
NC_017022.1	terminator_00653	1834754	1834772	+	TransTermHP	EFAU004_RS09090	NA	FALSE	Not_detect	Not_detect	Not_detect	Not_detect	Not_detect	Not_detect
NC_017022.1	terminator_00654	1835940	1835977	-	TransTermHP	EFAU004_RS09100	NA	FALSE	Not_detect	Not_detect	Not_detect	Not_detect	Not_detect	Not_detect
NC_017022.1	terminator_00655	1842072	1842127	-	gene_converged;TransTermHP	EFAU004_RS09130	NA	FALSE	Not_detect	Not_detect	Not_detect	Not_detect	Not_detect	Not_detect
NC_017022.1	terminator_00656	1842073	1842125	+	gene_converged;TransTermHP	EFAU004_RS15450	NA	FALSE	Not_detect	Not_detect	Not_detect	Not_detect	Not_detect	Not_detect
NC_017022.1	terminator_00657	1842645	1842681	+	gene_converged;TransTermHP	EFAU004_RS15455	NA	FALSE	Not_detect	Not_detect	Not_detect	Not_detect	Not_detect	Not_detect
NC_017022.1	terminator_00658	1842654	1842676	-	TransTermHP	EFAU004_RS09135	NA	FALSE	Not_detect	Not_detect	Not_detect	Not_detect	Not_detect	Not_detect
NC_017022.1	terminator_00659	1845027	1845043	-	TransTermHP	EFAU004_RS09150	NA	FALSE	Not_detect	Not_detect	Not_detect	Not_detect	Not_detect	Not_detect
NC_017022.1	terminator_00660	1845173	1845192	+	TransTermHP	EFAU004_RS09145	NA	FALSE	Not_detect	Not_detect	Not_detect	Not_detect	Not_detect	Not_detect
NC_017022.1	terminator_00661	1845833	1845856	-	TransTermHP	EFAU004_RS09160	NA	FALSE	Not_detect	Not_detect	Not_detect	Not_detect	Not_detect	Not_detect
NC_017022.1	terminator_00662	1847483	1847517	-	TransTermHP	EFAU004_RS09165	NA	FALSE	Not_detect	Not_detect	Not_detect	Not_detect	Not_detect	Not_detect
NC_017022.1	terminator_00663	1848181	1848210	-	TransTermHP	EFAU004_RS09175	NA	FALSE	Not_detect	Not_detect	Not_detect	Not_detect	Not_detect	Not_detect
NC_017022.1	terminator_00664	1852921	1852947	-	TransTermHP	EFAU004_RS09205	NA	FALSE	Not_detect	Not_detect	Not_detect	Not_detect	Not_detect	Not_detect
NC_017022.1	terminator_00665	1855281	1855313	-	gene_converged	EFAU004_RS09210	NA	FALSE	Not_detect	Not_detect	Not_detect	Not_detect	Not_detect	Not_detect
NC_017022.1	terminator_00666	1858469	1858504	-	TransTermHP	EFAU004_RS09225	NA	FALSE	Not_detect	Not_detect	Not_detect	Not_detect	Not_detect	Not_detect
NC_017022.1	terminator_00667	1860029	1860051	-	TransTermHP	EFAU004_RS09230	NA	FALSE	Not_detect	Not_detect	Not_detect	Not_detect	Not_detect	Not_detect
NC_017022.1	terminator_00668	1864118	1864130	-	TransTermHP	EFAU004_RS15460	NA	FALSE	Not_detect	Not_detect	Not_detect	Not_detect	Not_detect	Not_detect
NC_017022.1	terminator_00669	1864747	1864786	-	TransTermHP	EFAU004_RS09255	NA	FALSE	Not_detect	Not_detect	Not_detect	Not_detect	Not_detect	Not_detect
NC_017022.1	terminator_00670	1864749	1864784	+	TransTermHP	EFAU004_RS09250	NA	FALSE	Not_detect	Not_detect	Not_detect	Not_detect	Not_detect	Not_detect
NC_017022.1	terminator_00671	1868530	1868542	-	TransTermHP	EFAU004_RS09270	NA	FALSE	Not_detect	Not_detect	Not_detect	Not_detect	Not_detect	Not_detect
NC_017022.1	terminator_00672	1868659	1868671	+	TransTermHP	EFAU004_RS09265	NA	FALSE	Not_detect	Not_detect	Not_detect	Not_detect	Not_detect	Not_detect
NC_017022.1	terminator_00673	1876323	1876342	-	TransTermHP	EFAU004_RS09295	NA	FALSE	Not_detect	Not_detect	Not_detect	Not_detect	Not_detect	Not_detect
NC_017022.1	terminator_00674	1878279	1878305	-	TransTermHP	EFAU004_RS09305	NA	FALSE	Not_detect	Not_detect	Not_detect	Not_detect	Not_detect	Not_detect
NC_017022.1	terminator_00675	1881084	1881112	-	TransTermHP	EFAU004_RS09315	NA	FALSE	Not_detect	Not_detect	Not_detect	Not_detect	Not_detect	Not_detect
NC_017022.1	terminator_00676	1886152	1886207	-	TransTermHP	EFAU004_RS09330	NA	FALSE	Not_detect	Not_detect	Not_detect	Not_detect	Not_detect	Not_detect
NC_017022.1	terminator_00677	1887668	1887693	-	TransTermHP	EFAU004_RS09340	NA	FALSE	Not_detect	Not_detect	Not_detect	Not_detect	Not_detect	Not_detect
NC_017022.1	terminator_00678	1893558	1893597	-	gene_converged;TransTermHP	EFAU004_RS09365	NA	FALSE	Not_detect	Not_detect	Not_detect	Not_detect	Not_detect	Not_detect
NC_017022.1	terminator_00679	1895056	1895067	-	TransTermHP	EFAU004_RS09375	NC_017022.1_transcript1597	FALSE	Not_detect	Not_detect	Not_detect	Not_detect	Not_detect	Not_detect
NC_017022.1	terminator_00680	1898841	1898896	-	gene_converged;TransTermHP	EFAU004_RS09405	NA	FALSE	Not_detect	Not_detect	Not_detect	Not_detect	Not_detect	Not_detect
NC_017022.1	terminator_00681	1904934	1904945	-	TransTermHP	EFAU004_RS09440	NA	FALSE	Not_detect	Not_detect	Not_detect	Not_detect	Not_detect	Not_detect
NC_017022.1	terminator_00682	1904961	1904973	+	TransTermHP	EFAU004_RS09435	NA	FALSE	Not_detect	Not_detect	Not_detect	Not_detect	Not_detect	Not_detect
NC_017022.1	terminator_00683	1909043	1909067	+	TransTermHP	EFAU004_RS09445	NA	FALSE	Not_detect	Not_detect	Not_detect	Not_detect	Not_detect	Not_detect
NC_017022.1	terminator_00684	1910647	1910687	+	gene_converged	EFAU004_RS09450	NA	FALSE	Not_detect	Not_detect	Not_detect	Not_detect	Not_detect	Not_detect
NC_017022.1	terminator_00685	1910521	1910611	-	gene_converged;TransTermHP	EFAU004_RS09455	NA	FALSE	Not_detect	Not_detect	Not_detect	Not_detect	Not_detect	Not_detect
NC_017022.1	terminator_00686	1912997	1913045	-	gene_converged;TransTermHP	EFAU004_RS09470	NA	FALSE	Not_detect	Not_detect	Not_detect	Not_detect	Not_detect	Not_detect
NC_017022.1	terminator_00687	1913060	1913079	+	gene_converged	EFAU004_RS09465	NA	FALSE	Not_detect	Not_detect	Not_detect	Not_detect	Not_detect	Not_detect
NC_017022.1	terminator_00688	1913532	1913550	-	TransTermHP	EFAU004_RS09475	NA	FALSE	Not_detect	Not_detect	Not_detect	Not_detect	Not_detect	Not_detect
NC_017022.1	terminator_00689	1915546	1915581	+	TransTermHP	EFAU004_RS15480	NA	FALSE	Not_detect	Not_detect	Not_detect	Not_detect	Not_detect	Not_detect
NC_017022.1	terminator_00690	1920421	1920473	-	TransTermHP	EFAU004_RS09500	NA	FALSE	Not_detect	Not_detect	Not_detect	Not_detect	Not_detect	Not_detect
NC_017022.1	terminator_00691	1922911	1922945	+	TransTermHP	EFAU004_RS09505	NA	FALSE	Not_detect	Not_detect	Not_detect	Not_detect	Not_detect	Not_detect
NC_017022.1	terminator_00692	1926722	1926738	-	TransTermHP	EFAU004_RS09550	NA	FALSE	Not_detect	Not_detect	Not_detect	Not_detect	Not_detect	Not_detect
NC_017022.1	terminator_00693	1928008	1928037	+	gene_converged;TransTermHP	EFAU004_RS15495	NA	FALSE	Not_detect	Not_detect	Not_detect	Not_detect	Not_detect	Not_detect
NC_017022.1	terminator_00694	1928015	1928031	-	TransTermHP	EFAU004_RS09555	NA	FALSE	Not_detect	Not_detect	Not_detect	Not_detect	Not_detect	Not_detect
NC_017022.1	terminator_00695	1929166	1929193	-	TransTermHP	EFAU004_RS09565	NA	FALSE	Not_detect	Not_detect	Not_detect	Not_detect	Not_detect	Not_detect
NC_017022.1	terminator_00696	1931354	1931374	+	TransTermHP	EFAU004_RS09570	NA	FALSE	Not_detect	Not_detect	Not_detect	Not_detect	Not_detect	Not_detect
NC_017022.1	terminator_00697	1932729	1932750	+	gene_converged	EFAU004_RS09580	NA	FALSE	Not_detect	Not_detect	Not_detect	Not_detect	Not_detect	Not_detect
NC_017022.1	terminator_00698	1934651	1934692	-	gene_converged;TransTermHP	EFAU004_RS09595	NA	FALSE	Not_detect	Not_detect	Not_detect	Not_detect	Not_detect	Not_detect
NC_017022.1	terminator_00699	1939761	1939784	-	TransTermHP	EFAU004_RS09615	NA	FALSE	Not_detect	Not_detect	Not_detect	Not_detect	Not_detect	Not_detect
NC_017022.1	terminator_00700	1941898	1941930	-	TransTermHP	EFAU004_RS09625	NA	FALSE	Not_detect	Not_detect	Not_detect	Not_detect	Not_detect	Not_detect
NC_017022.1	terminator_00701	1942323	1942357	+	gene_converged	EFAU004_RS15510	NA	FALSE	Not_detect	Not_detect	Not_detect	Not_detect	Not_detect	Not_detect
NC_017022.1	terminator_00702	1944110	1944129	-	TransTermHP	EFAU004_RS09630	NA	FALSE	Not_detect	Not_detect	Not_detect	Not_detect	Not_detect	Not_detect
NC_017022.1	terminator_00703	1946650	1946707	-	TransTermHP	EFAU004_RS09640	NA	FALSE	Not_detect	Not_detect	Not_detect	Not_detect	Not_detect	Not_detect
NC_017022.1	terminator_00704	1955672	1955684	-	TransTermHP	EFAU004_RS09680	NC_017022.1_transcript1658	FALSE	Not_detect	Not_detect	Not_detect	Not_detect	Not_detect	Not_detect
NC_017022.1	terminator_00705	1961054	1961097	-	gene_converged;TransTermHP	EFAU004_RS09705	NA	FALSE	Not_detect	Not_detect	Not_detect	Not_detect	Not_detect	Not_detect
NC_017022.1	terminator_00706	1963455	1963507	-	TransTermHP	EFAU004_RS09715	NC_017022.1_transcript1666	FALSE	Not_detect	Not_detect	Not_detect	Not_detect	Not_detect	Not_detect
NC_017022.1	terminator_00707	1965709	1965762	+	TransTermHP	EFAU004_RS09725	NA	FALSE	Not_detect	Not_detect	Not_detect	Not_detect	Not_detect	Not_detect
NC_017022.1	terminator_00708	1966852	1966909	-	gene_converged;TransTermHP	EFAU004_RS09735	NA	FALSE	Not_detect	Not_detect	Not_detect	Not_detect	Not_detect	Not_detect
NC_017022.1	terminator_00709	1969641	1969652	-	TransTermHP	EFAU004_RS09755	NA	FALSE	Not_detect	Not_detect	Not_detect	Not_detect	Not_detect	Not_detect
NC_017022.1	terminator_00710	1973713	1973736	-	TransTermHP	EFAU004_RS09775	NA	FALSE	Not_detect	Not_detect	Not_detect	Not_detect	Not_detect	Not_detect
NC_017022.1	terminator_00711	1978457	1978473	-	TransTermHP	EFAU004_RS09800	NA	FALSE	Not_detect	Not_detect	Not_detect	Not_detect	Not_detect	Not_detect
NC_017022.1	terminator_00712	1978757	1978769	+	TransTermHP	EFAU004_RS09795	NA	FALSE	Not_detect	Not_detect	Not_detect	Not_detect	Not_detect	Not_detect
NC_017022.1	terminator_00713	1983698	1983732	-	TransTermHP	EFAU004_RS09815	NA	FALSE	Not_detect	Not_detect	Not_detect	Not_detect	Not_detect	Not_detect
NC_017022.1	terminator_00714	1990710	1990727	-	TransTermHP	EFAU004_RS09850	NC_017022.1_transcript1683	FALSE	Not_detect	Not_detect	Not_detect	Not_detect	Not_detect	Not_detect
NC_017022.1	terminator_00715	2000869	2000895	-	gene_converged	EFAU004_RS09895	NC_017022.1_transcript1692	FALSE	Not_detect	Not_detect	Not_detect	Not_detect	Not_detect	Not_detect
NC_017022.1	terminator_00716	2006687	2006711	+	gene_converged	EFAU004_RS09920	NA	FALSE	Not_detect	Not_detect	Not_detect	Not_detect	Not_detect	Not_detect
NC_017022.1	terminator_00717	2006635	2006691	-	gene_converged	EFAU004_RS09930	NA	FALSE	Not_detect	Not_detect	Not_detect	Not_detect	Not_detect	Not_detect
NC_017022.1	terminator_00718	2008801	2008845	+	TransTermHP	EFAU004_RS09935	NA	FALSE	Not_detect	Not_detect	Not_detect	Not_detect	Not_detect	Not_detect
NC_017022.1	terminator_00719	2008698	2008751	-	TransTermHP	EFAU004_RS09940	NA	FALSE	Not_detect	Not_detect	Not_detect	Not_detect	Not_detect	Not_detect
NC_017022.1	terminator_00720	2010461	2010495	-	TransTermHP	EFAU004_RS09945	NA	FALSE	Not_detect	Not_detect	Not_detect	Not_detect	Not_detect	Not_detect
NC_017022.1	terminator_00721	2011183	2011233	-	TransTermHP	EFAU004_RS09955	NA	FALSE	Not_detect	Not_detect	Not_detect	Not_detect	Not_detect	Not_detect
NC_017022.1	terminator_00722	2022644	2022674	-	gene_converged	EFAU004_RS10000	NA	FALSE	Not_detect	Not_detect	Not_detect	Not_detect	Not_detect	Not_detect
NC_017022.1	terminator_00723	2022677	2022726	+	gene_converged;TransTermHP	EFAU004_RS09995	NA	FALSE	Not_detect	Not_detect	Not_detect	Not_detect	Not_detect	Not_detect
NC_017022.1	terminator_00724	2023223	2023245	-	TransTermHP	EFAU004_RS10005	NC_017022.1_transcript1716	FALSE	Not_detect	Not_detect	Not_detect	Not_detect	Not_detect	Not_detect
NC_017022.1	terminator_00725	2023504	2023516	-	TransTermHP	EFAU004_RS10010	NC_017022.1_transcript1716	FALSE	Not_detect	Not_detect	Not_detect	Not_detect	Not_detect	Not_detect
NC_017022.1	terminator_00726	2025007	2025051	+	TransTermHP	EFAU004_RS10015	NA	FALSE	Not_detect	Not_detect	Not_detect	Not_detect	Not_detect	Not_detect
NC_017022.1	terminator_00727	2032857	2032877	+	TransTermHP	EFAU004_RS10045	NA	FALSE	Not_detect	Not_detect	Not_detect	Not_detect	Not_detect	Not_detect
NC_017022.1	terminator_00728	2041375	2041415	-	TransTermHP	EFAU004_RS10080	NA	FALSE	Not_detect	Not_detect	Not_detect	Not_detect	Not_detect	Not_detect
NC_017022.1	terminator_00729	2043357	2043379	-	TransTermHP	EFAU004_RS10085	NA	FALSE	Not_detect	Not_detect	Not_detect	Not_detect	Not_detect	Not_detect
NC_017022.1	terminator_00730	2057329	2057344	-	TransTermHP	EFAU004_RS10150	NC_017022.1_transcript1740	FALSE	Not_detect	Not_detect	Not_detect	Not_detect	Not_detect	Not_detect
NC_017022.1	terminator_00731	2063594	2063604	-	TransTermHP	EFAU004_RS10185	NC_017022.1_transcript1741	FALSE	Not_detect	Not_detect	Not_detect	Not_detect	Not_detect	Not_detect
NC_017022.1	terminator_00732	2068017	2068030	-	TransTermHP	EFAU004_RS10205	NC_017022.1_transcript1745	FALSE	Not_detect	Not_detect	Not_detect	Not_detect	Not_detect	Not_detect
NC_017022.1	terminator_00733	2072684	2072720	-	TransTermHP	EFAU004_RS10220	NA	FALSE	Not_detect	Not_detect	Not_detect	Not_detect	Not_detect	Not_detect
NC_017022.1	terminator_00734	2075243	2075261	-	TransTermHP	EFAU004_RS10235	NC_017022.1_transcript1751	FALSE	Not_detect	Not_detect	Not_detect	Not_detect	Not_detect	Not_detect
NC_017022.1	terminator_00735	2076423	2076435	-	TransTermHP	EFAU004_RS10245	NA	FALSE	Not_detect	Not_detect	Not_detect	Not_detect	Not_detect	Not_detect
NC_017022.1	terminator_00736	2079814	2079825	-	TransTermHP	EFAU004_RS10280	NC_017022.1_transcript1762	FALSE	Not_detect	Not_detect	Not_detect	Not_detect	Not_detect	Not_detect
NC_017022.1	terminator_00737	2088057	2088082	-	TransTermHP	EFAU004_RS10330	NC_017022.1_transcript1763	FALSE	Not_detect	Not_detect	Not_detect	Not_detect	Not_detect	Not_detect
NC_017022.1	terminator_00738	2088362	2088372	-	TransTermHP	EFAU004_RS10335	NC_017022.1_transcript1763	FALSE	Not_detect	Not_detect	Not_detect	Not_detect	Not_detect	Not_detect
NC_017022.1	terminator_00739	2092161	2092215	-	gene_converged	EFAU004_RS10350	NC_017022.1_transcript1763	FALSE	Not_detect	Not_detect	Not_detect	Not_detect	Not_detect	Not_detect
NC_017022.1	terminator_00740	2097923	2097981	-	gene_converged	EFAU004_RS10385	NA	FALSE	Not_detect	Not_detect	Not_detect	Not_detect	Not_detect	Not_detect
NC_017022.1	terminator_00741	2102857	2102867	-	TransTermHP	EFAU004_RS10405	NC_017022.1_transcript1772	FALSE	Not_detect	Not_detect	Not_detect	Not_detect	Not_detect	Not_detect
NC_017022.1	terminator_00742	2104062	2104092	-	TransTermHP	EFAU004_RS10410	NA	FALSE	Not_detect	Not_detect	Not_detect	Not_detect	Not_detect	Not_detect
NC_017022.1	terminator_00743	2105627	2105654	-	TransTermHP	EFAU004_RS10420	NA	FALSE	Not_detect	Not_detect	Not_detect	Not_detect	Not_detect	Not_detect
NC_017022.1	terminator_00744	2106701	2106719	-	TransTermHP	EFAU004_RS10425	NA	FALSE	Not_detect	Not_detect	Not_detect	Not_detect	Not_detect	Not_detect
NC_017022.1	terminator_00745	2108185	2108197	-	TransTermHP	EFAU004_RS15550	NC_017022.1_transcript1777	FALSE	Not_detect	Not_detect	Not_detect	Not_detect	Not_detect	Not_detect
NC_017022.1	terminator_00746	2108952	2108966	-	TransTermHP	EFAU004_RS10440	NC_017022.1_transcript1777	FALSE	Not_detect	Not_detect	Not_detect	Not_detect	Not_detect	Not_detect
NC_017022.1	terminator_00747	2112647	2112699	-	gene_converged;TransTermHP	EFAU004_RS10460	NA	FALSE	Not_detect	Not_detect	Not_detect	Not_detect	Not_detect	Not_detect
NC_017022.1	terminator_00748	2113689	2113743	-	gene_converged;TransTermHP	EFAU004_RS10470	NA	FALSE	Not_detect	Not_detect	Not_detect	Not_detect	Not_detect	Not_detect
NC_017022.1	terminator_00749	2117060	2117081	+	TransTermHP	EFAU004_RS10480	NC_017022.1_transcript1782	FALSE	Not_detect	Not_detect	Not_detect	Not_detect	Not_detect	Not_detect
NC_017022.1	terminator_00750	2128381	2128421	-	gene_converged	EFAU004_RS10540	NA	FALSE	Not_detect	Not_detect	Not_detect	Not_detect	Not_detect	Not_detect
NC_017022.1	terminator_00751	2128425	2128477	+	gene_converged;TransTermHP	EFAU004_RS10535	NA	FALSE	Not_detect	Not_detect	Not_detect	Not_detect	Not_detect	Not_detect
NC_017022.1	terminator_00752	2130519	2130547	-	TransTermHP	EFAU004_RS10545	NA	FALSE	Not_detect	Not_detect	Not_detect	Not_detect	Not_detect	Not_detect
NC_017022.1	terminator_00753	2140064	2140116	+	gene_converged;TransTermHP	EFAU004_RS10580	NA	FALSE	Not_detect	Not_detect	Not_detect	Not_detect	Not_detect	Not_detect
NC_017022.1	terminator_00754	2140064	2140116	-	gene_converged;TransTermHP	EFAU004_RS10585	NA	FALSE	Not_detect	Not_detect	Not_detect	Not_detect	Not_detect	Not_detect
NC_017022.1	terminator_00755	2143938	2143969	-	TransTermHP	EFAU004_RS10605	NA	FALSE	Not_detect	Not_detect	Not_detect	Not_detect	Not_detect	Not_detect
NC_017022.1	terminator_00756	2145195	2145217	-	gene_converged	EFAU004_RS10610	NA	FALSE	Not_detect	Not_detect	Not_detect	Not_detect	Not_detect	Not_detect
NC_017022.1	terminator_00757	2149119	2149147	-	gene_converged	EFAU004_RS10620	NC_017022.1_transcript1801	FALSE	Not_detect	Not_detect	Not_detect	Not_detect	Not_detect	Not_detect
NC_017022.1	terminator_00758	2149720	2149735	-	TransTermHP	EFAU004_RS10625	NA	FALSE	Not_detect	Not_detect	Not_detect	Not_detect	Not_detect	Not_detect
NC_017022.1	terminator_00759	2150807	2150847	-	TransTermHP	EFAU004_RS10630	NA	FALSE	Not_detect	Not_detect	Not_detect	Not_detect	Not_detect	Not_detect
NC_017022.1	terminator_00760	2151783	2151813	-	TransTermHP	EFAU004_RS10635	NC_017022.1_transcript1804	FALSE	Not_detect	Not_detect	Not_detect	Not_detect	Not_detect	Not_detect
NC_017022.1	terminator_00761	2153317	2153344	-	TransTermHP	EFAU004_RS10640	NA	FALSE	Not_detect	Not_detect	Not_detect	Not_detect	Not_detect	Not_detect
NC_017022.1	terminator_00762	2153718	2153731	+	TransTermHP	EFAU004_RS15560	NA	FALSE	Not_detect	Not_detect	Not_detect	Not_detect	Not_detect	Not_detect
NC_017022.1	terminator_00763	2155956	2155969	-	TransTermHP	EFAU004_RS15565	NA	FALSE	Not_detect	Not_detect	Not_detect	Not_detect	Not_detect	Not_detect
NC_017022.1	terminator_00764	2156069	2156109	+	TransTermHP	EFAU004_RS10645	NA	FALSE	Not_detect	Not_detect	Not_detect	Not_detect	Not_detect	Not_detect
NC_017022.1	terminator_00765	2157484	2157540	+	gene_converged;TransTermHP	EFAU004_RS10650	NC_017022.1_transcript1808	FALSE	Not_detect	Not_detect	Not_detect	Not_detect	Not_detect	Not_detect
NC_017022.1	terminator_00766	2157485	2157539	-	gene_converged;TransTermHP	EFAU004_RS10655	NA	FALSE	Not_detect	Not_detect	Not_detect	Not_detect	Not_detect	Not_detect
NC_017022.1	terminator_00767	2161175	2161196	-	TransTermHP	EFAU004_RS10680	NA	FALSE	Not_detect	Not_detect	Not_detect	Not_detect	Not_detect	Not_detect
NC_017022.1	terminator_00768	2163770	2163804	-	gene_converged	EFAU004_RS10690	NA	FALSE	Not_detect	Not_detect	Not_detect	Not_detect	Not_detect	Not_detect
NC_017022.1	terminator_00769	2165755	2165766	-	TransTermHP	EFAU004_RS10700	NA	FALSE	Not_detect	Not_detect	Not_detect	Not_detect	Not_detect	Not_detect
NC_017022.1	terminator_00770	2166246	2166273	-	TransTermHP	EFAU004_RS15570	NA	FALSE	Not_detect	Not_detect	Not_detect	Not_detect	Not_detect	Not_detect
NC_017022.1	terminator_00771	2167812	2167845	-	TransTermHP	EFAU004_RS10720	NA	FALSE	Not_detect	Not_detect	Not_detect	Not_detect	Not_detect	Not_detect
NC_017022.1	terminator_00772	2170153	2170166	-	TransTermHP	EFAU004_RS10730	NA	FALSE	Not_detect	Not_detect	Not_detect	Not_detect	Not_detect	Not_detect
NC_017022.1	terminator_00773	2174423	2174457	+	gene_converged	EFAU004_RS10760	NA	FALSE	Not_detect	Not_detect	Not_detect	Not_detect	Not_detect	Not_detect
NC_017022.1	terminator_00774	2178816	2178857	-	gene_converged;TransTermHP	EFAU004_RS10795	NA	FALSE	Not_detect	Not_detect	Not_detect	Not_detect	Not_detect	Not_detect
NC_017022.1	terminator_00775	2183312	2183332	-	TransTermHP	EFAU004_RS10820	NA	FALSE	Not_detect	Not_detect	Not_detect	Not_detect	Not_detect	Not_detect
NC_017022.1	terminator_00776	2186242	2186252	+	TransTermHP	EFAU004_RS10835	NA	FALSE	Not_detect	Not_detect	Not_detect	Not_detect	Not_detect	Not_detect
NC_017022.1	terminator_00777	2187402	2187423	-	TransTermHP	EFAU004_RS10855	NA	FALSE	Not_detect	Not_detect	Not_detect	Not_detect	Not_detect	Not_detect
NC_017022.1	terminator_00778	2190228	2190267	+	gene_converged;TransTermHP	EFAU004_RS10870	NA	FALSE	Not_detect	Not_detect	Not_detect	Not_detect	Not_detect	Not_detect
NC_017022.1	terminator_00779	2190224	2190267	-	gene_converged;TransTermHP	EFAU004_RS10875	NA	FALSE	Not_detect	Not_detect	Not_detect	Not_detect	Not_detect	Not_detect
NC_017022.1	terminator_00780	2192431	2192459	-	gene_converged	EFAU004_RS10885	NC_017022.1_transcript1843	FALSE	Not_detect	Not_detect	Not_detect	Not_detect	Not_detect	Not_detect
NC_017022.1	terminator_00781	2193722	2193760	-	TransTermHP	EFAU004_RS10890	NA	FALSE	Not_detect	Not_detect	Not_detect	Not_detect	Not_detect	Not_detect
NC_017022.1	terminator_00782	2196310	2196336	+	TransTermHP	EFAU004_RS10895	NA	FALSE	Not_detect	Not_detect	Not_detect	Not_detect	Not_detect	Not_detect
NC_017022.1	terminator_00783	2200777	2200822	-	gene_converged;TransTermHP	EFAU004_RS10920	NA	FALSE	Not_detect	Not_detect	Not_detect	Not_detect	Not_detect	Not_detect
NC_017022.1	terminator_00784	2212460	2212472	-	TransTermHP	EFAU004_RS10970	NA	FALSE	Not_detect	Not_detect	Not_detect	Not_detect	Not_detect	Not_detect
NC_017022.1	terminator_00785	2212754	2212770	+	TransTermHP	EFAU004_RS10965	NA	FALSE	Not_detect	Not_detect	Not_detect	Not_detect	Not_detect	Not_detect
NC_017022.1	terminator_00786	2217039	2217064	-	gene_converged	EFAU004_RS10995	NA	FALSE	Not_detect	Not_detect	Not_detect	Not_detect	Not_detect	Not_detect
NC_017022.1	terminator_00787	2217067	2217121	+	gene_converged;TransTermHP	EFAU004_RS10990	NA	FALSE	Not_detect	Not_detect	Not_detect	Not_detect	Not_detect	Not_detect
NC_017022.1	terminator_00788	2217707	2217719	-	TransTermHP	EFAU004_RS11000	NA	FALSE	Not_detect	Not_detect	Not_detect	Not_detect	Not_detect	Not_detect
NC_017022.1	terminator_00789	2222150	2222164	+	TransTermHP	EFAU004_RS11015	NC_017022.1_transcript1877	FALSE	Not_detect	Not_detect	Not_detect	Not_detect	Not_detect	Not_detect
NC_017022.1	terminator_00790	2224518	2224529	+	TransTermHP	EFAU004_RS15585	NA	FALSE	Not_detect	Not_detect	Not_detect	Not_detect	Not_detect	Not_detect
NC_017022.1	terminator_00791	2224430	2224452	-	gene_converged	EFAU004_RS11030	NA	FALSE	Not_detect	Not_detect	Not_detect	Not_detect	Not_detect	Not_detect
NC_017022.1	terminator_00792	2227318	2227346	-	TransTermHP	EFAU004_RS11045	NA	FALSE	Not_detect	Not_detect	Not_detect	Not_detect	Not_detect	Not_detect
NC_017022.1	terminator_00793	2230127	2230156	-	TransTermHP	EFAU004_RS11050	NC_017022.1_transcript1882	FALSE	Not_detect	Not_detect	Not_detect	Not_detect	Not_detect	Not_detect
NC_017022.1	terminator_00794	2236063	2236073	-	TransTermHP	EFAU004_RS11070	NC_017022.1_transcript1890	FALSE	Not_detect	Not_detect	Not_detect	Not_detect	Not_detect	Not_detect
NC_017022.1	terminator_00795	2241534	2241569	-	TransTermHP	EFAU004_RS11100	NA	FALSE	Not_detect	Not_detect	Not_detect	Not_detect	Not_detect	Not_detect
NC_017022.1	terminator_00796	2244659	2244677	+	TransTermHP	EFAU004_RS11120	NA	FALSE	Not_detect	Not_detect	Not_detect	Not_detect	Not_detect	Not_detect
NC_017022.1	terminator_00797	2244659	2244677	-	TransTermHP	EFAU004_RS11125	NA	FALSE	Not_detect	Not_detect	Not_detect	Not_detect	Not_detect	Not_detect
NC_017022.1	terminator_00798	2250632	2250650	+	TransTermHP	EFAU004_RS14830	NA	FALSE	Not_detect	Not_detect	Not_detect	Not_detect	Not_detect	Not_detect
NC_017022.1	terminator_00799	2256751	2256762	+	TransTermHP	EFAU004_RS11180	NA	FALSE	Not_detect	Not_detect	Not_detect	Not_detect	Not_detect	Not_detect
NC_017022.1	terminator_00800	2257337	2257388	-	gene_converged;TransTermHP	EFAU004_RS11190	NA	FALSE	Not_detect	Not_detect	Not_detect	Not_detect	Not_detect	Not_detect
NC_017022.1	terminator_00801	2262704	2262734	+	TransTermHP	EFAU004_RS11220	NC_017022.1_transcript1916	FALSE	Not_detect	Not_detect	Not_detect	Not_detect	Not_detect	Not_detect
NC_017022.1	terminator_00802	2266936	2266974	+	gene_converged;TransTermHP	EFAU004_RS11240	NA	FALSE	Not_detect	Not_detect	Not_detect	Not_detect	Not_detect	Not_detect
NC_017022.1	terminator_00803	2268229	2268239	-	TransTermHP	EFAU004_RS11255	NC_017022.1_transcript1920	FALSE	Not_detect	Not_detect	Not_detect	Not_detect	Not_detect	Not_detect
NC_017022.1	terminator_00804	2271456	2271467	-	TransTermHP	EFAU004_RS11270	NA	FALSE	Not_detect	Not_detect	Not_detect	Not_detect	Not_detect	Not_detect
NC_017022.1	terminator_00805	2276530	2276581	+	gene_converged;TransTermHP	EFAU004_RS11285	NA	FALSE	Not_detect	Not_detect	Not_detect	Not_detect	Not_detect	Not_detect
NC_017022.1	terminator_00806	2280490	2280522	-	gene_converged	EFAU004_RS11305	NA	FALSE	Not_detect	Not_detect	Not_detect	Not_detect	Not_detect	Not_detect
NC_017022.1	terminator_00807	2281515	2281540	-	TransTermHP	EFAU004_RS11310	NA	FALSE	Not_detect	Not_detect	Not_detect	Not_detect	Not_detect	Not_detect
NC_017022.1	terminator_00808	2285191	2285220	-	TransTermHP	EFAU004_RS11325	NA	FALSE	Not_detect	Not_detect	Not_detect	Not_detect	Not_detect	Not_detect
NC_017022.1	terminator_00809	2289877	2289912	-	TransTermHP	EFAU004_RS11355	NA	FALSE	Not_detect	Not_detect	Not_detect	Not_detect	Not_detect	Not_detect
NC_017022.1	terminator_00810	2298121	2298147	-	TransTermHP	EFAU004_RS11380	NC_017022.1_transcript1943	FALSE	Not_detect	Not_detect	Not_detect	Not_detect	Not_detect	Not_detect
NC_017022.1	terminator_00811	2300062	2300117	-	gene_converged;TransTermHP	EFAU004_RS11390	NC_017022.1_transcript1946	FALSE	Not_detect	Not_detect	Not_detect	Not_detect	Not_detect	Not_detect
NC_017022.1	terminator_00812	2300070	2300110	+	TransTermHP	EFAU004_RS11385	NA	FALSE	Not_detect	Not_detect	Not_detect	Not_detect	Not_detect	Not_detect
NC_017022.1	terminator_00813	2300913	2300947	-	TransTermHP	EFAU004_RS11395	NA	FALSE	Not_detect	Not_detect	Not_detect	Not_detect	Not_detect	Not_detect
NC_017022.1	terminator_00814	2303469	2303484	-	TransTermHP	EFAU004_RS11410	NA	FALSE	Not_detect	Not_detect	Not_detect	Not_detect	Not_detect	Not_detect
NC_017022.1	terminator_00815	2306061	2306100	-	gene_converged	EFAU004_RS11420	NA	FALSE	Not_detect	Not_detect	Not_detect	Not_detect	Not_detect	Not_detect
NC_017022.1	terminator_00816	2306100	2306142	+	TransTermHP	EFAU004_RS11415	NA	FALSE	Not_detect	Not_detect	Not_detect	Not_detect	Not_detect	Not_detect
NC_017022.1	terminator_00817	2308720	2308733	+	TransTermHP	EFAU004_RS15625	NC_017022.1_transcript1954	FALSE	Not_detect	Not_detect	Not_detect	Not_detect	Not_detect	Not_detect
NC_017022.1	terminator_00818	2309738	2309785	-	TransTermHP	EFAU004_RS11430	NA	FALSE	Not_detect	Not_detect	Not_detect	Not_detect	Not_detect	Not_detect
NC_017022.1	terminator_00819	2310287	2310303	+	TransTermHP	EFAU004_RS15630	NA	FALSE	Not_detect	Not_detect	Not_detect	Not_detect	Not_detect	Not_detect
NC_017022.1	terminator_00820	2317352	2317382	-	TransTermHP	EFAU004_RS11465	NA	FALSE	Not_detect	Not_detect	Not_detect	Not_detect	Not_detect	Not_detect
NC_017022.1	terminator_00821	2317885	2317895	+	TransTermHP	EFAU004_RS15635	NA	FALSE	Not_detect	Not_detect	Not_detect	Not_detect	Not_detect	Not_detect
NC_017022.1	terminator_00822	2319532	2319547	-	TransTermHP	EFAU004_RS11475	NA	FALSE	Not_detect	Not_detect	Not_detect	Not_detect	Not_detect	Not_detect
NC_017022.1	terminator_00823	2319923	2319956	+	gene_converged	EFAU004_RS11470	NA	FALSE	Not_detect	Not_detect	Not_detect	Not_detect	Not_detect	Not_detect
NC_017022.1	terminator_00824	2319921	2319960	-	gene_converged	EFAU004_RS11480	NA	FALSE	Not_detect	Not_detect	Not_detect	Not_detect	Not_detect	Not_detect
NC_017022.1	terminator_00825	2320321	2320350	+	gene_converged	transcript_01963	NC_017022.1_transcript1963	FALSE	Not_detect	Not_detect	Not_detect	Not_detect	Not_detect	Not_detect
NC_017022.1	terminator_00826	2321186	2321216	-	gene_converged	EFAU004_RS11485	NA	FALSE	Not_detect	Not_detect	Not_detect	Not_detect	Not_detect	Not_detect
NC_017022.1	terminator_00827	2323923	2323946	-	TransTermHP	EFAU004_RS11490	NA	FALSE	Not_detect	Not_detect	Not_detect	Not_detect	Not_detect	Not_detect
NC_017022.1	terminator_00828	2325685	2325715	-	TransTermHP	EFAU004_RS11495	NA	FALSE	Not_detect	Not_detect	Not_detect	Not_detect	Not_detect	Not_detect
NC_017022.1	terminator_00829	2328931	2328963	-	gene_converged	EFAU004_RS11515	NA	FALSE	Not_detect	Not_detect	Not_detect	Not_detect	Not_detect	Not_detect
NC_017022.1	terminator_00830	2329019	2329054	+	gene_converged;TransTermHP	EFAU004_RS11510	NA	FALSE	Not_detect	Not_detect	Not_detect	Not_detect	Not_detect	Not_detect
NC_017022.1	terminator_00831	2329019	2329054	+	gene_converged;TransTermHP	EFAU004_RS11510	NA	FALSE	Not_detect	Not_detect	Not_detect	Not_detect	Not_detect	Not_detect
NC_017022.1	terminator_00832	2331663	2331698	-	TransTermHP	EFAU004_RS11520	NA	FALSE	Not_detect	Not_detect	Not_detect	Not_detect	Not_detect	Not_detect
NC_017022.1	terminator_00833	2333144	2333161	+	TransTermHP	EFAU004_RS11525	NC_017022.1_transcript1976	FALSE	Not_detect	Not_detect	Not_detect	Not_detect	Not_detect	Not_detect
NC_017022.1	terminator_00834	2333852	2333903	+	TransTermHP	EFAU004_RS11530	NA	FALSE	Not_detect	Not_detect	Not_detect	Not_detect	Not_detect	Not_detect
NC_017022.1	terminator_00835	2334443	2334469	+	TransTermHP	EFAU004_RS11540	NA	FALSE	Not_detect	Not_detect	Not_detect	Not_detect	Not_detect	Not_detect
NC_017022.1	terminator_00836	2335164	2335175	-	TransTermHP	EFAU004_RS11550	NA	FALSE	Not_detect	Not_detect	Not_detect	Not_detect	Not_detect	Not_detect
NC_017022.1	terminator_00837	2336293	2336328	-	TransTermHP	glyA	NA	FALSE	Not_detect	Not_detect	Not_detect	Not_detect	Not_detect	Not_detect
NC_017022.1	terminator_00838	2342800	2342861	+	gene_converged;TransTermHP	EFAU004_RS11595	NA	FALSE	Not_detect	Not_detect	Not_detect	Not_detect	Not_detect	Not_detect
NC_017022.1	terminator_00839	2344156	2344185	-	gene_converged	EFAU004_RS11610	NC_017022.1_transcript1987	FALSE	Not_detect	Not_detect	Not_detect	Not_detect	Not_detect	Not_detect
NC_017022.1	terminator_00840	2349603	2349646	-	gene_converged;TransTermHP	EFAU004_RS11635	NA	FALSE	Not_detect	Not_detect	Not_detect	Not_detect	Not_detect	Not_detect
NC_017022.1	terminator_00841	2355121	2355162	-	TransTermHP	EFAU004_RS11660	NA	FALSE	Not_detect	Not_detect	Not_detect	Not_detect	Not_detect	Not_detect
NC_017022.1	terminator_00842	2355124	2355159	+	TransTermHP	EFAU004_RS11655	NA	FALSE	Not_detect	Not_detect	Not_detect	Not_detect	Not_detect	Not_detect
NC_017022.1	terminator_00843	2362822	2362836	-	TransTermHP	EFAU004_RS15645	NA	FALSE	Not_detect	Not_detect	Not_detect	Not_detect	Not_detect	Not_detect
NC_017022.1	terminator_00844	2363575	2363586	+	TransTermHP	EFAU004_RS15650	NA	FALSE	Not_detect	Not_detect	Not_detect	Not_detect	Not_detect	Not_detect
NC_017022.1	terminator_00845	2363326	2363363	-	gene_converged;TransTermHP	EFAU004_RS11690	NA	FALSE	Not_detect	Not_detect	Not_detect	Not_detect	Not_detect	Not_detect
NC_017022.1	terminator_00846	2369010	2369066	-	gene_converged;TransTermHP	EFAU004_RS11715	NA	FALSE	Not_detect	Not_detect	Not_detect	Not_detect	Not_detect	Not_detect
NC_017022.1	terminator_00847	2371927	2371947	-	gene_converged	EFAU004_RS11735	NA	FALSE	Not_detect	Not_detect	Not_detect	Not_detect	Not_detect	Not_detect
NC_017022.1	terminator_00848	2371956	2372005	+	gene_converged;TransTermHP	EFAU004_RS11725	NA	FALSE	Not_detect	Not_detect	Not_detect	Not_detect	Not_detect	Not_detect
NC_017022.1	terminator_00849	2374624	2374645	-	TransTermHP	EFAU004_RS15660	NA	FALSE	Not_detect	Not_detect	Not_detect	Not_detect	Not_detect	Not_detect
NC_017022.1	terminator_00850	2374895	2374913	+	TransTermHP	EFAU004_RS15655	NA	FALSE	Not_detect	Not_detect	Not_detect	Not_detect	Not_detect	Not_detect
NC_017022.1	terminator_00851	2375014	2375033	-	gene_converged	EFAU004_RS11745	NA	FALSE	Not_detect	Not_detect	Not_detect	Not_detect	Not_detect	Not_detect
NC_017022.1	terminator_00852	2375993	2376025	-	TransTermHP	EFAU004_RS11750	NA	FALSE	Not_detect	Not_detect	Not_detect	Not_detect	Not_detect	Not_detect
NC_017022.1	terminator_00853	2381784	2381810	+	TransTermHP	EFAU004_RS11765	NA	FALSE	Not_detect	Not_detect	Not_detect	Not_detect	Not_detect	Not_detect
NC_017022.1	terminator_00854	2381585	2381614	-	gene_converged	EFAU004_RS11770	NA	FALSE	Not_detect	Not_detect	Not_detect	Not_detect	Not_detect	Not_detect
NC_017022.1	terminator_00855	2382958	2382969	-	TransTermHP	EFAU004_RS11775	NA	FALSE	Not_detect	Not_detect	Not_detect	Not_detect	Not_detect	Not_detect
NC_017022.1	terminator_00856	2383910	2383934	-	TransTermHP	EFAU004_RS11780	NA	FALSE	Not_detect	Not_detect	Not_detect	Not_detect	Not_detect	Not_detect
NC_017022.1	terminator_00857	2389210	2389231	-	gene_converged	transcript_02016,EFAU004_RS11805	NC_017022.1_transcript2016	FALSE	Not_detect	Not_detect	Not_detect	Not_detect	Not_detect	Not_detect
NC_017022.1	terminator_00858	2391879	2391933	+	gene_converged;TransTermHP	EFAU004_RS11810	NA	FALSE	Not_detect	Not_detect	Not_detect	Not_detect	Not_detect	Not_detect
NC_017022.1	terminator_00859	2394790	2394815	-	TransTermHP	EFAU004_RS11830	NA	FALSE	Not_detect	Not_detect	Not_detect	Not_detect	Not_detect	Not_detect
NC_017022.1	terminator_00860	2395182	2395200	+	TransTermHP	EFAU004_RS11825	NA	FALSE	Not_detect	Not_detect	Not_detect	Not_detect	Not_detect	Not_detect
NC_017022.1	terminator_00861	2397783	2397801	-	TransTermHP	EFAU004_RS11850	NA	FALSE	Not_detect	Not_detect	Not_detect	Not_detect	Not_detect	Not_detect
NC_017022.1	terminator_00862	2400620	2400641	-	gene_converged	EFAU004_RS11860	NA	FALSE	Not_detect	Not_detect	Not_detect	Not_detect	Not_detect	Not_detect
NC_017022.1	terminator_00863	2401036	2401054	-	TransTermHP	EFAU004_RS11865	NA	FALSE	Not_detect	Not_detect	Not_detect	Not_detect	Not_detect	Not_detect
NC_017022.1	terminator_00864	2402618	2402635	-	TransTermHP	EFAU004_RS15665	NA	FALSE	Not_detect	Not_detect	Not_detect	Not_detect	Not_detect	Not_detect
NC_017022.1	terminator_00865	2405273	2405298	-	TransTermHP	EFAU004_RS11890	NA	FALSE	Not_detect	Not_detect	Not_detect	Not_detect	Not_detect	Not_detect
NC_017022.1	terminator_00866	2418267	2418279	-	TransTermHP	EFAU004_RS11960	NA	FALSE	Not_detect	Not_detect	Not_detect	Not_detect	Not_detect	Not_detect
NC_017022.1	terminator_00867	2422528	2422538	-	TransTermHP	EFAU004_RS11990	NA	FALSE	Not_detect	Not_detect	Not_detect	Not_detect	Not_detect	Not_detect
NC_017022.1	terminator_00868	2423964	2423975	-	TransTermHP	EFAU004_RS12010	NA	FALSE	Not_detect	Not_detect	Not_detect	Not_detect	Not_detect	Not_detect
NC_017022.1	terminator_00869	2425647	2425684	-	TransTermHP	EFAU004_RS12030	NA	FALSE	Not_detect	Not_detect	Not_detect	Not_detect	Not_detect	Not_detect
NC_017022.1	terminator_00870	2428754	2428781	-	TransTermHP	EFAU004_RS12050	NA	FALSE	Not_detect	Not_detect	Not_detect	Not_detect	Not_detect	Not_detect
NC_017022.1	terminator_00871	2430899	2430909	-	TransTermHP	EFAU004_RS12080	NA	FALSE	Not_detect	Not_detect	Not_detect	Not_detect	Not_detect	Not_detect
NC_017022.1	terminator_00872	2431335	2431351	+	TransTermHP	EFAU004_RS12075	NA	FALSE	Not_detect	Not_detect	Not_detect	Not_detect	Not_detect	Not_detect
NC_017022.1	terminator_00873	2431707	2431734	+	TransTermHP	EFAU004_RS15680	NA	FALSE	Not_detect	Not_detect	Not_detect	Not_detect	Not_detect	Not_detect
NC_017022.1	terminator_00874	2434905	2434934	+	gene_converged;TransTermHP	EFAU004_RS12100	NA	FALSE	Not_detect	Not_detect	Not_detect	Not_detect	Not_detect	Not_detect
NC_017022.1	terminator_00875	2437803	2437854	-	TransTermHP	EFAU004_RS12120	NA	FALSE	Not_detect	Not_detect	Not_detect	Not_detect	Not_detect	Not_detect
NC_017022.1	terminator_00876	2448583	2448595	-	TransTermHP	EFAU004_RS12175	NA	FALSE	Not_detect	Not_detect	Not_detect	Not_detect	Not_detect	Not_detect
NC_017022.1	terminator_00877	2448936	2448975	+	gene_converged	EFAU004_RS12170	NA	FALSE	Not_detect	Not_detect	Not_detect	Not_detect	Not_detect	Not_detect
NC_017022.1	terminator_00878	2449759	2449771	-	TransTermHP	EFAU004_RS15685	NA	FALSE	Not_detect	Not_detect	Not_detect	Not_detect	Not_detect	Not_detect
NC_017022.1	terminator_00879	2449923	2449971	-	TransTermHP	EFAU004_RS12190	NA	FALSE	Not_detect	Not_detect	Not_detect	Not_detect	Not_detect	Not_detect
NC_017022.1	terminator_00880	2453026	2453062	-	TransTermHP	EFAU004_RS12200	NA	FALSE	Not_detect	Not_detect	Not_detect	Not_detect	Not_detect	Not_detect
NC_017022.1	terminator_00881	2453951	2453964	-	TransTermHP	EFAU004_RS12210	NA	FALSE	Not_detect	Not_detect	Not_detect	Not_detect	Not_detect	Not_detect
NC_017022.1	terminator_00882	2461834	2461891	-	gene_converged	EFAU004_RS12240	NA	FALSE	Not_detect	Not_detect	Not_detect	Not_detect	Not_detect	Not_detect
NC_017022.1	terminator_00883	2462854	2462882	-	TransTermHP	EFAU004_RS12245	NA	FALSE	Not_detect	Not_detect	Not_detect	Not_detect	Not_detect	Not_detect
NC_017022.1	terminator_00884	2465515	2465560	-	gene_converged;TransTermHP	EFAU004_RS15695	NA	FALSE	Not_detect	Not_detect	Not_detect	Not_detect	Not_detect	Not_detect
NC_017022.1	terminator_00885	2465519	2465559	+	gene_converged;TransTermHP	EFAU004_RS12250	NA	FALSE	Not_detect	Not_detect	Not_detect	Not_detect	Not_detect	Not_detect
NC_017022.1	terminator_00886	2466869	2466884	-	TransTermHP	EFAU004_RS12260	NA	FALSE	Not_detect	Not_detect	Not_detect	Not_detect	Not_detect	Not_detect
NC_017022.1	terminator_00887	2470069	2470100	-	TransTermHP	EFAU004_RS12280	NC_017022.1_transcript2101	FALSE	Not_detect	Not_detect	Not_detect	Not_detect	Not_detect	Not_detect
NC_017022.1	terminator_00888	2472379	2472394	+	TransTermHP	EFAU004_RS12290	NC_017022.1_transcript2103	FALSE	Not_detect	Not_detect	Not_detect	Not_detect	Not_detect	Not_detect
NC_017022.1	terminator_00889	2473301	2473352	-	gene_converged;TransTermHP	EFAU004_RS12300	NA	FALSE	Not_detect	Not_detect	Not_detect	Not_detect	Not_detect	Not_detect
NC_017022.1	terminator_00890	2473305	2473349	+	gene_converged;TransTermHP	EFAU004_RS12295	NA	FALSE	Not_detect	Not_detect	Not_detect	Not_detect	Not_detect	Not_detect
NC_017022.1	terminator_00891	2474288	2474314	-	gene_converged	EFAU004_RS12305	NA	FALSE	Not_detect	Not_detect	Not_detect	Not_detect	Not_detect	Not_detect
NC_017022.1	terminator_00892	2479470	2479516	+	gene_converged;TransTermHP	EFAU004_RS12335	NA	FALSE	Not_detect	Not_detect	Not_detect	Not_detect	Not_detect	Not_detect
NC_017022.1	terminator_00893	2479472	2479513	-	gene_converged;TransTermHP	EFAU004_RS12340	NA	FALSE	Not_detect	Not_detect	Not_detect	Not_detect	Not_detect	Not_detect
NC_017022.1	terminator_00894	2480409	2480456	-	gene_converged	EFAU004_RS12345	NA	FALSE	Not_detect	Not_detect	Not_detect	Not_detect	Not_detect	Not_detect
NC_017022.1	terminator_00895	2484605	2484654	-	gene_converged;TransTermHP	EFAU004_RS12365	NA	FALSE	Not_detect	Not_detect	Not_detect	Not_detect	Not_detect	Not_detect
NC_017022.1	terminator_00896	2484609	2484653	+	gene_converged;TransTermHP	EFAU004_RS12360	NA	FALSE	Not_detect	Not_detect	Not_detect	Not_detect	Not_detect	Not_detect
NC_017022.1	terminator_00897	2484993	2485004	-	TransTermHP	EFAU004_RS12370	NC_017022.1_transcript2119	FALSE	Not_detect	Not_detect	Not_detect	Not_detect	Not_detect	Not_detect
NC_017022.1	terminator_00898	2487438	2487464	-	gene_converged	EFAU004_RS12375	NC_017022.1_transcript2119	FALSE	Not_detect	Not_detect	Not_detect	Not_detect	Not_detect	Not_detect
NC_017022.1	terminator_00899	2488834	2488873	-	gene_converged	EFAU004_RS12385	NA	FALSE	Not_detect	Not_detect	Not_detect	Not_detect	Not_detect	Not_detect
NC_017022.1	terminator_00900	2495233	2495247	+	TransTermHP	EFAU004_RS12415	NC_017022.1_transcript2128	FALSE	Not_detect	Not_detect	Not_detect	Not_detect	Not_detect	Not_detect
NC_017022.1	terminator_00901	2496068	2496101	+	TransTermHP	EFAU004_RS12420	NA	FALSE	Not_detect	Not_detect	Not_detect	Not_detect	Not_detect	Not_detect
NC_017022.1	terminator_00902	2497524	2497570	-	gene_converged;TransTermHP	EFAU004_RS12435	NA	FALSE	Not_detect	Not_detect	Not_detect	Not_detect	Not_detect	Not_detect
NC_017022.1	terminator_00903	2503688	2503744	+	gene_converged;TransTermHP	EFAU004_RS12455	NC_017022.1_transcript2136	FALSE	Not_detect	Not_detect	Not_detect	Not_detect	Not_detect	Not_detect
NC_017022.1	terminator_00904	2503685	2503771	-	gene_converged;TransTermHP	EFAU004_RS12460	NA	FALSE	Not_detect	Not_detect	Not_detect	Not_detect	Not_detect	Not_detect
NC_017022.1	terminator_00905	2511376	2511401	-	TransTermHP	EFAU004_RS12475	NA	FALSE	Not_detect	Not_detect	Not_detect	Not_detect	Not_detect	Not_detect
NC_017022.1	terminator_00906	2513254	2513303	+	gene_converged;TransTermHP	EFAU004_RS12485	NA	FALSE	Not_detect	Not_detect	Not_detect	Not_detect	Not_detect	Not_detect
NC_017022.1	terminator_00907	2513255	2513302	-	gene_converged;TransTermHP	EFAU004_RS12490	NA	FALSE	Not_detect	Not_detect	Not_detect	Not_detect	Not_detect	Not_detect
NC_017022.1	terminator_00908	2520888	2520929	-	gene_converged;TransTermHP	EFAU004_RS12515	NA	FALSE	Not_detect	Not_detect	Not_detect	Not_detect	Not_detect	Not_detect
NC_017022.1	terminator_00909	2522223	2522260	-	gene_converged	EFAU004_RS12520	NA	FALSE	Not_detect	Not_detect	Not_detect	Not_detect	Not_detect	Not_detect
NC_017022.1	terminator_00910	2533351	2533382	+	gene_converged	EFAU004_RS12565	NA	FALSE	Not_detect	Not_detect	Not_detect	Not_detect	Not_detect	Not_detect
NC_017022.1	terminator_00911	2533555	2533590	-	gene_converged	EFAU004_RS12570	NA	FALSE	Not_detect	Not_detect	Not_detect	Not_detect	Not_detect	Not_detect
NC_017022.1	terminator_00912	2536772	2536796	-	TransTermHP	EFAU004_RS12590	NA	FALSE	Not_detect	Not_detect	Not_detect	Not_detect	Not_detect	Not_detect
NC_017022.1	terminator_00913	2541669	2541726	-	gene_converged;TransTermHP	EFAU004_RS12620	NA	FALSE	Not_detect	Not_detect	Not_detect	Not_detect	Not_detect	Not_detect
NC_017022.1	terminator_00914	2543177	2543198	-	gene_converged	EFAU004_RS12630	NC_017022.1_transcript2166	FALSE	Not_detect	Not_detect	Not_detect	Not_detect	Not_detect	Not_detect
NC_017022.1	terminator_00915	2545972	2545988	+	TransTermHP	EFAU004_RS12640	NC_017022.1_transcript2170	FALSE	Not_detect	Not_detect	Not_detect	Not_detect	Not_detect	Not_detect
NC_017022.1	terminator_00916	2552593	2552619	-	TransTermHP	EFAU004_RS12670	NA	FALSE	Not_detect	Not_detect	Not_detect	Not_detect	Not_detect	Not_detect
NC_017022.1	terminator_00917	2553214	2553229	+	TransTermHP	EFAU004_RS15725	NA	FALSE	Not_detect	Not_detect	Not_detect	Not_detect	Not_detect	Not_detect
NC_017022.1	terminator_00918	2557589	2557607	+	TransTermHP	EFAU004_RS15730	NA	FALSE	Not_detect	Not_detect	Not_detect	Not_detect	Not_detect	Not_detect
NC_017022.1	terminator_00919	2559515	2559552	-	TransTermHP	EFAU004_RS12690	NA	FALSE	Not_detect	Not_detect	Not_detect	Not_detect	Not_detect	Not_detect
NC_017022.1	terminator_00920	2566313	2566324	-	TransTermHP	EFAU004_RS12720	NA	FALSE	Not_detect	Not_detect	Not_detect	Not_detect	Not_detect	Not_detect
NC_017022.1	terminator_00921	2567629	2567647	-	gene_converged	EFAU004_RS12725	NA	FALSE	Not_detect	Not_detect	Not_detect	Not_detect	Not_detect	Not_detect
NC_017022.1	terminator_00922	2568778	2568814	-	TransTermHP	EFAU004_RS12730	NA	FALSE	Not_detect	Not_detect	Not_detect	Not_detect	Not_detect	Not_detect
NC_017022.1	terminator_00923	2573476	2573504	+	TransTermHP	EFAU004_RS12745	NA	FALSE	Not_detect	Not_detect	Not_detect	Not_detect	Not_detect	Not_detect
NC_017022.1	terminator_00924	2573211	2573240	-	TransTermHP	EFAU004_RS15740	NA	FALSE	Not_detect	Not_detect	Not_detect	Not_detect	Not_detect	Not_detect
NC_017022.1	terminator_00925	2573476	2573504	-	TransTermHP	EFAU004_RS12750	NA	FALSE	Not_detect	Not_detect	Not_detect	Not_detect	Not_detect	Not_detect
NC_017022.1	terminator_00926	2575763	2575789	-	gene_converged	transcript_02183	NC_017022.1_transcript2183	FALSE	Not_detect	Not_detect	Not_detect	Not_detect	Not_detect	Not_detect
NC_017022.1	terminator_00927	2579994	2580008	+	TransTermHP	EFAU004_RS12765	NA	FALSE	Not_detect	Not_detect	Not_detect	Not_detect	Not_detect	Not_detect
NC_017022.1	terminator_00928	2581514	2581551	+	TransTermHP	EFAU004_RS12770	NA	FALSE	Not_detect	Not_detect	Not_detect	Not_detect	Not_detect	Not_detect
NC_017022.1	terminator_00929	2584891	2584934	+	gene_converged;TransTermHP	EFAU004_RS12785	NA	FALSE	Not_detect	Not_detect	Not_detect	Not_detect	Not_detect	Not_detect
NC_017022.1	terminator_00930	2588812	2588867	-	gene_converged;TransTermHP	EFAU004_RS12805	NA	FALSE	Not_detect	Not_detect	Not_detect	Not_detect	Not_detect	Not_detect
NC_017022.1	terminator_00931	2588816	2588870	+	gene_converged;TransTermHP	EFAU004_RS12800	NC_017022.1_transcript2190	FALSE	Not_detect	Not_detect	Not_detect	Not_detect	Not_detect	Not_detect
NC_017022.1	terminator_00932	2597244	2597282	-	gene_converged;TransTermHP	EFAU004_RS12830	NA	FALSE	Not_detect	Not_detect	Not_detect	Not_detect	Not_detect	Not_detect
NC_017022.1	terminator_00933	2597353	2597397	+	gene_converged	EFAU004_RS12825	NA	FALSE	Not_detect	Not_detect	Not_detect	Not_detect	Not_detect	Not_detect
NC_017022.1	terminator_00934	2598751	2598778	-	gene_converged	EFAU004_RS12835	NA	FALSE	Not_detect	Not_detect	Not_detect	Not_detect	Not_detect	Not_detect
NC_017022.1	terminator_00935	2598751	2598778	-	gene_converged	EFAU004_RS12835	NA	FALSE	Not_detect	Not_detect	Not_detect	Not_detect	Not_detect	Not_detect
NC_017022.1	terminator_00936	2601628	2601658	-	TransTermHP	EFAU004_RS12845	NA	FALSE	Not_detect	Not_detect	Not_detect	Not_detect	Not_detect	Not_detect
NC_017022.1	terminator_00937	2615396	2615444	-	gene_converged;TransTermHP	EFAU004_RS12910	NA	FALSE	Not_detect	Not_detect	Not_detect	Not_detect	Not_detect	Not_detect
NC_017022.1	terminator_00938	2617687	2617718	-	TransTermHP	EFAU004_RS12920	NA	FALSE	Not_detect	Not_detect	Not_detect	Not_detect	Not_detect	Not_detect
NC_017022.1	terminator_00939	2623202	2623229	-	gene_converged	transcript_02216,EFAU004_RS12930	NC_017022.1_transcript2216	FALSE	Not_detect	Not_detect	Not_detect	Not_detect	Not_detect	Not_detect
NC_017022.1	terminator_00940	2622961	2622984	+	gene_converged	transcript_02215	NC_017022.1_transcript2215	FALSE	Not_detect	Not_detect	Not_detect	Not_detect	Not_detect	Not_detect
NC_017022.1	terminator_00941	2627646	2627682	-	TransTermHP	EFAU004_RS12945	NA	FALSE	Not_detect	Not_detect	Not_detect	Not_detect	Not_detect	Not_detect
NC_017022.1	terminator_00942	2627862	2627895	+	gene_converged	EFAU004_RS12940	NA	FALSE	Not_detect	Not_detect	Not_detect	Not_detect	Not_detect	Not_detect
NC_017022.1	terminator_00943	2637317	2637359	-	gene_converged;TransTermHP	EFAU004_RS12975	NA	FALSE	Not_detect	Not_detect	Not_detect	Not_detect	Not_detect	Not_detect
NC_017022.1	terminator_00944	2637432	2637489	+	gene_converged	EFAU004_RS12970	NA	FALSE	Not_detect	Not_detect	Not_detect	Not_detect	Not_detect	Not_detect
NC_017022.1	terminator_00945	2645694	2645731	-	TransTermHP	EFAU004_RS13005	NA	FALSE	Not_detect	Not_detect	Not_detect	Not_detect	Not_detect	Not_detect
NC_017022.1	terminator_00946	2649769	2649787	+	TransTermHP	EFAU004_RS15765	NA	FALSE	Not_detect	Not_detect	Not_detect	Not_detect	Not_detect	Not_detect
NC_017022.1	terminator_00947	2654515	2654525	-	TransTermHP	EFAU004_RS13045	NC_017022.1_transcript2238	FALSE	Not_detect	Not_detect	Not_detect	Not_detect	Not_detect	Not_detect
NC_017022.1	terminator_00948	2662672	2662705	-	gene_converged	EFAU004_RS13085	NC_017022.1_transcript2243	FALSE	Not_detect	Not_detect	Not_detect	Not_detect	Not_detect	Not_detect
NC_017022.1	terminator_00949	2688237	2688268	-	gene_converged	EFAU004_RS13190	NA	FALSE	Not_detect	Not_detect	Not_detect	Not_detect	Not_detect	Not_detect
NC_017022.1	terminator_00950	2693356	2693392	-	TransTermHP	EFAU004_RS13220	NC_017022.1_transcript2269	FALSE	Not_detect	Not_detect	Not_detect	Not_detect	Not_detect	Not_detect
NC_017022.1	terminator_00951	2697398	2697434	-	TransTermHP	EFAU004_RS13235	NA	FALSE	Not_detect	Not_detect	Not_detect	Not_detect	Not_detect	Not_detect
NC_017022.1	terminator_00952	2710040	2710089	+	gene_converged;TransTermHP	EFAU004_RS15780	NA	FALSE	Not_detect	Not_detect	Not_detect	Not_detect	Not_detect	Not_detect
NC_017022.1	terminator_00953	2711290	2711319	-	TransTermHP	EFAU004_RS13290	NC_017022.1_transcript2282	FALSE	Not_detect	Not_detect	Not_detect	Not_detect	Not_detect	Not_detect
NC_017022.1	terminator_00954	2716593	2716620	-	TransTermHP	EFAU004_RS13320	NA	FALSE	Not_detect	Not_detect	Not_detect	Not_detect	Not_detect	Not_detect
NC_017022.1	terminator_00955	2727182	2727208	+	TransTermHP	EFAU004_RS13365	NA	FALSE	Not_detect	Not_detect	Not_detect	Not_detect	Not_detect	Not_detect
NC_017022.1	terminator_00956	2730007	2730024	-	TransTermHP	EFAU004_RS13385	NA	FALSE	Not_detect	Not_detect	Not_detect	Not_detect	Not_detect	Not_detect
NC_017022.1	terminator_00957	2730498	2730528	-	TransTermHP	EFAU004_RS13390	NA	FALSE	Not_detect	Not_detect	Not_detect	Not_detect	Not_detect	Not_detect
NC_017022.1	terminator_00958	2732705	2732744	-	TransTermHP	EFAU004_RS13400	NA	FALSE	Not_detect	Not_detect	Not_detect	Not_detect	Not_detect	Not_detect
NC_017022.1	terminator_00959	2735119	2735134	-	TransTermHP	EFAU004_RS13410	NA	FALSE	Not_detect	Not_detect	Not_detect	Not_detect	Not_detect	Not_detect
NC_017022.1	terminator_00960	2736553	2736576	-	TransTermHP	EFAU004_RS13420	NA	FALSE	Not_detect	Not_detect	Not_detect	Not_detect	Not_detect	Not_detect
NC_017022.1	terminator_00961	2738107	2738141	-	TransTermHP	EFAU004_RS13425	NA	FALSE	Not_detect	Not_detect	Not_detect	Not_detect	Not_detect	Not_detect
NC_017022.1	terminator_00962	2739021	2739031	-	TransTermHP	EFAU004_RS13430	NA	FALSE	Not_detect	Not_detect	Not_detect	Not_detect	Not_detect	Not_detect
NC_017022.1	terminator_00963	2743910	2743943	+	gene_converged	EFAU004_RS13445	NA	FALSE	Not_detect	Not_detect	Not_detect	Not_detect	Not_detect	Not_detect
NC_017022.1	terminator_00964	2743789	2743823	-	TransTermHP	EFAU004_RS13450	NA	FALSE	Not_detect	Not_detect	Not_detect	Not_detect	Not_detect	Not_detect
NC_017022.1	terminator_00965	2745417	2745460	-	TransTermHP	EFAU004_RS13460	NA	FALSE	Not_detect	Not_detect	Not_detect	Not_detect	Not_detect	Not_detect
NC_017022.1	terminator_00966	2745504	2745538	+	gene_converged	EFAU004_RS13455	NA	FALSE	Not_detect	Not_detect	Not_detect	Not_detect	Not_detect	Not_detect
NC_017022.1	terminator_00967	2747198	2747209	-	TransTermHP	EFAU004_RS13470	NA	FALSE	Not_detect	Not_detect	Not_detect	Not_detect	Not_detect	Not_detect
NC_017022.1	terminator_00968	2749992	2750013	-	TransTermHP	EFAU004_RS13480	NA	FALSE	Not_detect	Not_detect	Not_detect	Not_detect	Not_detect	Not_detect
NC_017022.1	terminator_00969	2750185	2750239	+	gene_converged;TransTermHP	EFAU004_RS13475	NA	FALSE	Not_detect	Not_detect	Not_detect	Not_detect	Not_detect	Not_detect
NC_017022.1	terminator_00970	2751683	2751734	-	gene_converged;TransTermHP	EFAU004_RS13495	NA	FALSE	Not_detect	Not_detect	Not_detect	Not_detect	Not_detect	Not_detect
NC_017022.1	terminator_00971	2751687	2751735	+	gene_converged;TransTermHP	EFAU004_RS13490	NA	FALSE	Not_detect	Not_detect	Not_detect	Not_detect	Not_detect	Not_detect
NC_017022.1	terminator_00972	2753108	2753126	-	gene_converged	EFAU004_RS13500	NC_017022.1_transcript2320	FALSE	Not_detect	Not_detect	Not_detect	Not_detect	Not_detect	Not_detect
NC_017022.1	terminator_00973	2754368	2754394	-	TransTermHP	EFAU004_RS13505	NA	FALSE	Not_detect	Not_detect	Not_detect	Not_detect	Not_detect	Not_detect
NC_017022.1	terminator_00974	2754735	2754758	+	TransTermHP	EFAU004_RS15810	NA	FALSE	Not_detect	Not_detect	Not_detect	Not_detect	Not_detect	Not_detect
NC_017022.1	terminator_00975	2756437	2756463	-	TransTermHP	EFAU004_RS13515	NA	FALSE	Not_detect	Not_detect	Not_detect	Not_detect	Not_detect	Not_detect
NC_017022.1	terminator_00976	2758659	2758684	-	gene_converged	EFAU004_RS13520	NA	FALSE	Not_detect	Not_detect	Not_detect	Not_detect	Not_detect	Not_detect
NC_017022.1	terminator_00977	2758659	2758680	-	gene_converged	EFAU004_RS13520	NA	FALSE	Not_detect	Not_detect	Not_detect	Not_detect	Not_detect	Not_detect
NC_017022.1	terminator_00978	2762683	2762709	-	TransTermHP	EFAU004_RS13545	NA	FALSE	Not_detect	Not_detect	Not_detect	Not_detect	Not_detect	Not_detect
NC_017022.1	terminator_00979	2763692	2763714	-	TransTermHP	EFAU004_RS13550	NA	FALSE	Not_detect	Not_detect	Not_detect	Not_detect	Not_detect	Not_detect
NC_017022.1	terminator_00980	2765420	2765449	-	TransTermHP	EFAU004_RS15815	NA	FALSE	Not_detect	Not_detect	Not_detect	Not_detect	Not_detect	Not_detect
NC_017022.1	terminator_00981	2766480	2766532	-	gene_converged;TransTermHP	EFAU004_RS13565	NA	FALSE	Not_detect	Not_detect	Not_detect	Not_detect	Not_detect	Not_detect
NC_017022.1	terminator_00982	2769688	2769708	-	gene_converged	EFAU004_RS13590	NA	FALSE	Not_detect	Not_detect	Not_detect	Not_detect	Not_detect	Not_detect
NC_017022.1	terminator_00983	2776078	2776119	-	TransTermHP	EFAU004_RS13620	NA	FALSE	Not_detect	Not_detect	Not_detect	Not_detect	Not_detect	Not_detect
NC_017022.1	terminator_00984	2776931	2776987	-	gene_converged	EFAU004_RS13630	NA	FALSE	Not_detect	Not_detect	Not_detect	Not_detect	Not_detect	Not_detect
NC_017022.1	terminator_00985	2777504	2777514	-	TransTermHP	EFAU004_RS13635	NC_017022.1_transcript2354	FALSE	Not_detect	Not_detect	Not_detect	Not_detect	Not_detect	Not_detect
NC_017022.1	terminator_00986	2783851	2783875	-	gene_converged;TransTermHP	EFAU004_RS13665	NA	FALSE	Not_detect	Not_detect	Not_detect	Not_detect	Not_detect	Not_detect
NC_017022.1	terminator_00987	2785157	2785181	+	TransTermHP	EFAU004_RS13675	NA	FALSE	Not_detect	Not_detect	Not_detect	Not_detect	Not_detect	Not_detect
NC_017022.1	terminator_00988	2786714	2786737	+	TransTermHP	EFAU004_RS13680	NA	FALSE	Not_detect	Not_detect	Not_detect	Not_detect	Not_detect	Not_detect
NC_017022.1	terminator_00989	2790039	2790069	+	TransTermHP	EFAU004_RS13685	NA	FALSE	Not_detect	Not_detect	Not_detect	Not_detect	Not_detect	Not_detect
NC_017022.1	terminator_00990	2791190	2791211	+	TransTermHP	EFAU004_RS13700	NA	FALSE	Not_detect	Not_detect	Not_detect	Not_detect	Not_detect	Not_detect
NC_017022.1	terminator_00991	2795012	2795067	+	TransTermHP	EFAU004_RS13725	NA	FALSE	Not_detect	Not_detect	Not_detect	Not_detect	Not_detect	Not_detect
NC_017022.1	terminator_00992	2800076	2800105	+	TransTermHP	EFAU004_RS13740	NA	FALSE	Not_detect	Not_detect	Not_detect	Not_detect	Not_detect	Not_detect
NC_017022.1	terminator_00993	2807018	2807034	+	TransTermHP	EFAU004_RS13765	NA	FALSE	Not_detect	Not_detect	Not_detect	Not_detect	Not_detect	Not_detect
NC_017022.1	terminator_00994	2807405	2807423	-	TransTermHP	EFAU004_RS13775	NA	FALSE	Not_detect	Not_detect	Not_detect	Not_detect	Not_detect	Not_detect
NC_017022.1	terminator_00995	2808396	2808407	-	TransTermHP	EFAU004_RS13780	NA	FALSE	Not_detect	Not_detect	Not_detect	Not_detect	Not_detect	Not_detect
NC_017022.1	terminator_00996	2810618	2810631	-	TransTermHP	EFAU004_RS13785	NA	FALSE	Not_detect	Not_detect	Not_detect	Not_detect	Not_detect	Not_detect
NC_017022.1	terminator_00997	2811516	2811526	-	TransTermHP	EFAU004_RS13790	NA	FALSE	Not_detect	Not_detect	Not_detect	Not_detect	Not_detect	Not_detect
NC_017022.1	terminator_00998	2819953	2819990	-	TransTermHP	EFAU004_RS13805	NA	FALSE	Not_detect	Not_detect	Not_detect	Not_detect	Not_detect	Not_detect
NC_017022.1	terminator_00999	2823251	2823288	+	TransTermHP	EFAU004_RS13820	NA	FALSE	Not_detect	Not_detect	Not_detect	Not_detect	Not_detect	Not_detect
NC_017022.1	terminator_01000	2824278	2824288	+	TransTermHP	EFAU004_RS15870	NA	FALSE	Not_detect	Not_detect	Not_detect	Not_detect	Not_detect	Not_detect
NC_017022.1	terminator_01001	2824672	2824716	+	gene_converged;TransTermHP	EFAU004_RS15875	NA	FALSE	Not_detect	Not_detect	Not_detect	Not_detect	Not_detect	Not_detect
NC_017022.1	terminator_01002	2826105	2826135	-	TransTermHP	EFAU004_RS15880	NA	FALSE	Not_detect	Not_detect	Not_detect	Not_detect	Not_detect	Not_detect
NC_017022.1	terminator_01003	2826314	2826334	+	TransTermHP	EFAU004_RS13835	NA	FALSE	Not_detect	Not_detect	Not_detect	Not_detect	Not_detect	Not_detect
NC_017022.1	terminator_01004	2828935	2828950	-	TransTermHP	EFAU004_RS13855	NA	FALSE	Not_detect	Not_detect	Not_detect	Not_detect	Not_detect	Not_detect
NC_017022.1	terminator_01005	2829194	2829207	+	TransTermHP	EFAU004_RS13850	NA	FALSE	Not_detect	Not_detect	Not_detect	Not_detect	Not_detect	Not_detect
NC_017022.1	terminator_01006	2833427	2833464	-	TransTermHP	EFAU004_RS13890	NA	FALSE	Not_detect	Not_detect	Not_detect	Not_detect	Not_detect	Not_detect
NC_017022.1	terminator_01007	2835375	2835394	-	TransTermHP	EFAU004_RS13895	NC_017022.1_transcript2407	FALSE	Not_detect	Not_detect	Not_detect	Not_detect	Not_detect	Not_detect
NC_017022.1	terminator_01008	2836826	2836870	-	TransTermHP	EFAU004_RS13900	NA	FALSE	Not_detect	Not_detect	Not_detect	Not_detect	Not_detect	Not_detect
NC_017022.1	terminator_01009	2837455	2837467	-	TransTermHP	EFAU004_RS13905	NA	FALSE	Not_detect	Not_detect	Not_detect	Not_detect	Not_detect	Not_detect
NC_017022.1	terminator_01010	2837700	2837718	+	TransTermHP	EFAU004_RS15890	NA	FALSE	Not_detect	Not_detect	Not_detect	Not_detect	Not_detect	Not_detect
NC_017022.1	terminator_01011	2838532	2838570	-	gene_converged;TransTermHP	EFAU004_RS13915	NA	FALSE	Not_detect	Not_detect	Not_detect	Not_detect	Not_detect	Not_detect
NC_017022.1	terminator_01012	2845328	2845350	-	TransTermHP	EFAU004_RS13950	NA	FALSE	Not_detect	Not_detect	Not_detect	Not_detect	Not_detect	Not_detect
NC_017022.1	terminator_01013	2845900	2845914	-	TransTermHP	EFAU004_RS13955	NC_017022.1_transcript2415	FALSE	Not_detect	Not_detect	Not_detect	Not_detect	Not_detect	Not_detect
NC_017022.1	terminator_01014	2849181	2849207	+	TransTermHP	EFAU004_RS15895	NA	FALSE	Not_detect	Not_detect	Not_detect	Not_detect	Not_detect	Not_detect
NC_017022.1	terminator_01015	2849559	2849594	-	gene_converged	EFAU004_RS13980	NA	FALSE	Not_detect	Not_detect	Not_detect	Not_detect	Not_detect	Not_detect
NC_017022.1	terminator_01016	2854940	2854969	-	TransTermHP	EFAU004_RS13995	NA	FALSE	Not_detect	Not_detect	Not_detect	Not_detect	Not_detect	Not_detect
NC_017022.1	terminator_01017	2858573	2858587	-	TransTermHP	EFAU004_RS14010	NA	FALSE	Not_detect	Not_detect	Not_detect	Not_detect	Not_detect	Not_detect
NC_017022.1	terminator_01018	2864900	2864913	-	TransTermHP	EFAU004_RS14035	NA	FALSE	Not_detect	Not_detect	Not_detect	Not_detect	Not_detect	Not_detect
NC_017022.1	terminator_01019	2865192	2865211	-	TransTermHP	EFAU004_RS14040	NA	FALSE	Not_detect	Not_detect	Not_detect	Not_detect	Not_detect	Not_detect
NC_017022.1	terminator_01020	2867511	2867542	-	TransTermHP	EFAU004_RS14050	NA	FALSE	Not_detect	Not_detect	Not_detect	Not_detect	Not_detect	Not_detect
NC_017022.1	terminator_01021	2871088	2871108	-	TransTermHP	EFAU004_RS14065	NA	FALSE	Not_detect	Not_detect	Not_detect	Not_detect	Not_detect	Not_detect
NC_017022.1	terminator_01022	2873036	2873074	-	gene_converged	EFAU004_RS14075	NA	FALSE	Not_detect	Not_detect	Not_detect	Not_detect	Not_detect	Not_detect
NC_017022.1	terminator_01023	2873840	2873863	-	TransTermHP	EFAU004_RS14080	NA	FALSE	Not_detect	Not_detect	Not_detect	Not_detect	Not_detect	Not_detect
NC_017022.1	terminator_01024	2878266	2878281	-	TransTermHP	EFAU004_RS14105	NA	FALSE	Not_detect	Not_detect	Not_detect	Not_detect	Not_detect	Not_detect
NC_017022.1	terminator_01025	2878407	2878417	+	TransTermHP	EFAU004_RS14100	NA	FALSE	Not_detect	Not_detect	Not_detect	Not_detect	Not_detect	Not_detect
NC_017022.1	terminator_01026	2881395	2881414	+	TransTermHP	EFAU004_RS14110	NA	FALSE	Not_detect	Not_detect	Not_detect	Not_detect	Not_detect	Not_detect
NC_017022.1	terminator_01027	2883327	2883339	-	TransTermHP	EFAU004_RS14130	NA	FALSE	Not_detect	Not_detect	Not_detect	Not_detect	Not_detect	Not_detect
NC_017022.1	terminator_01028	2885711	2885737	+	TransTermHP	EFAU004_RS14135	NA	FALSE	Not_detect	Not_detect	Not_detect	Not_detect	Not_detect	Not_detect
NC_017022.1	terminator_01029	2886485	2886509	-	TransTermHP	EFAU004_RS14145	NA	FALSE	Not_detect	Not_detect	Not_detect	Not_detect	Not_detect	Not_detect
NC_017022.1	terminator_01030	2894110	2894142	-	gene_converged	EFAU004_RS14180	NA	FALSE	Not_detect	Not_detect	Not_detect	Not_detect	Not_detect	Not_detect
NC_017022.1	terminator_01031	2895210	2895251	-	TransTermHP	EFAU004_RS14185	NA	FALSE	Not_detect	Not_detect	Not_detect	Not_detect	Not_detect	Not_detect
NC_017022.1	terminator_01032	2909484	2909503	+	gene_converged	EFAU004_RS14210	NA	FALSE	Not_detect	Not_detect	Not_detect	Not_detect	Not_detect	Not_detect
NC_017022.1	terminator_01033	2912305	2912333	+	TransTermHP	EFAU004_RS14225	NA	FALSE	Not_detect	Not_detect	Not_detect	Not_detect	Not_detect	Not_detect
NC_017022.1	terminator_01034	2915165	2915191	-	TransTermHP	EFAU004_RS14240	NA	FALSE	Not_detect	Not_detect	Not_detect	Not_detect	Not_detect	Not_detect
NC_017022.1	terminator_01035	2923389	2923413	+	gene_converged;TransTermHP	EFAU004_RS14270	NA	FALSE	Not_detect	Not_detect	Not_detect	Not_detect	Not_detect	Not_detect
NC_017022.1	terminator_01036	2923935	2923993	-	gene_converged;TransTermHP	EFAU004_RS14275	NA	FALSE	Not_detect	Not_detect	Not_detect	Not_detect	Not_detect	Not_detect
NC_017022.1	terminator_01037	2925437	2925451	-	TransTermHP	EFAU004_RS14280	NC_017022.1_transcript2467	FALSE	Not_detect	Not_detect	Not_detect	Not_detect	Not_detect	Not_detect
NC_017022.1	terminator_01038	2935522	2935540	+	TransTermHP	EFAU004_RS14835	NA	FALSE	Not_detect	Not_detect	Not_detect	Not_detect	Not_detect	Not_detect
NC_017022.1	terminator_01039	2941166	2941180	-	TransTermHP	EFAU004_RS15925	NA	FALSE	Not_detect	Not_detect	Not_detect	Not_detect	Not_detect	Not_detect
NC_017022.1	terminator_01040	2941454	2941478	-	gene_converged	EFAU004_RS14375	NA	FALSE	Not_detect	Not_detect	Not_detect	Not_detect	Not_detect	Not_detect
NC_017022.1	terminator_01041	2941564	2941615	+	TransTermHP	EFAU004_RS14370	NA	FALSE	Not_detect	Not_detect	Not_detect	Not_detect	Not_detect	Not_detect
NC_017022.1	terminator_01042	2943302	2943316	-	TransTermHP	EFAU004_RS15930	NA	FALSE	Not_detect	Not_detect	Not_detect	Not_detect	Not_detect	Not_detect
NC_017022.1	terminator_01043	2948284	2948315	-	gene_converged	EFAU004_RS14410	NA	FALSE	Not_detect	Not_detect	Not_detect	Not_detect	Not_detect	Not_detect
NC_017023.1	terminator_00000	3568	3616	+	gene_converged	transcript_02492,EFAU004_RS14785	NC_017023.1_transcript2492	TRUE	diff=1,0;high=1,0;low=0,0	diff=3,0;high=5,0;low=2,0	diff=3,0;high=4,0;low=1,0	diff=14,0;high=16,0;low=2,0	diff=13,0;high=18,0;low=5,0	diff=18,0;high=22,0;low=4,0
NC_017023.1	terminator_00001	3569	3615	-	gene_converged	transcript_02495	NC_017023.1_transcript2495	TRUE	diff=17,0;high=26,0;low=9,0	diff=18,0;high=32,0;low=14,0	diff=23,0;high=45,0;low=22,0	diff=44,0;high=76,0;low=32,0	diff=38,0;high=70,0;low=32,0	diff=38,0;high=64,0;low=26,0
NC_017024.1	terminator_00000	2077	2107	+	TransTermHP	EFAU004_RS14805	NC_017024.1_transcript2498	TRUE	diff=8,0;high=14,0;low=6,0	diff=6,0;high=11,5;low=5,5	diff=8,5;high=15,0;low=6,5	diff=7,0;high=13,5;low=6,5	diff=5,5;high=10,5;low=5,0	diff=6,0;high=9,5;low=3,5
NC_017024.1	terminator_00000	3799	3814	+	TransTermHP	EFAU004_RS14810	NA	FALSE	Not_detect	Not_detect	Not_detect	Not_detect	Not_detect	Not_detect
NC_017032.1	terminator_00000	6126	6161	+	gene_converged;TransTermHP	transcript_02516,EFAU004_RS14485	NC_017032.1_transcript2516	TRUE	diff=4,0;high=7,0;low=3,0	diff=4,0;high=7,0;low=3,0	diff=9,0;high=16,0;low=7,0	diff=5,0;high=8,0;low=3,0	diff=3,0;high=5,0;low=2,0	diff=2,0;high=3,0;low=1,0
NC_017032.1	terminator_00001	10779	10802	-	gene_converged	transcript_02521	NC_017032.1_transcript2521	TRUE	Not_detect	diff=2,0;high=2,0;low=0,0	diff=1,0;high=1,0;low=0,0	diff=144,0;high=145,0;low=1,0	diff=101,0;high=101,0;low=0,0	diff=114,0;high=114,0;low=0,0
NC_017032.1	terminator_00002	14932	14971	-	TransTermHP	EFAU004_RS14525	NC_017032.1_transcript2524	TRUE	diff=11,0;high=20,0;low=9,0	diff=15,0;high=21,0;low=6,0	diff=14,0;high=27,0;low=13,0	diff=13,0;high=19,0;low=6,0	diff=9,0;high=14,0;low=5,0	diff=10,0;high=19,0;low=9,0
NC_017032.1	terminator_00003	15848	15869	+	TransTermHP	EFAU004_RS14530	NC_017032.1_transcript2526	FALSE	Not_detect	Not_detect	Not_detect	Not_detect	Not_detect	Not_detect
NC_017032.1	terminator_00004	41820	41851	+	TransTermHP	EFAU004_RS14655	NC_017032.1_transcript2550	TRUE	diff=694,0;high=801,0;low=107,0	diff=793,0;high=893,0;low=100,0	diff=1338,0;high=1504,0;low=166,0	diff=20164,0;high=26640,0;low=6476,0	diff=18010,0;high=23635,0;low=5625,0	diff=18209,0;high=23504,0;low=5295,0
NC_017032.1	terminator_00005	42377	42407	+	TransTermHP	EFAU004_RS14660	NC_017032.1_transcript2552	TRUE	diff=4,0;high=7,0;low=3,0	diff=5,0;high=9,0;low=4,0	diff=7,0;high=10,0;low=3,0	diff=4,0;high=7,0;low=3,0	diff=4,0;high=6,0;low=2,0	diff=7,0;high=8,0;low=1,0
NC_017032.1	terminator_00006	46651	46676	+	TransTermHP	EFAU004_RS14695	NA	FALSE	Not_detect	Not_detect	Not_detect	Not_detect	Not_detect	Not_detect
NC_017032.1	terminator_00007	47645	47668	+	TransTermHP	EFAU004_RS14705	NC_017032.1_transcript2557	TRUE	diff=40,0;high=70,0;low=30,0	diff=30,0;high=56,0;low=26,0	diff=56,0;high=105,0;low=49,0	diff=22,0;high=43,0;low=21,0	diff=18,0;high=35,0;low=17,0	diff=29,0;high=55,0;low=26,0
NC_017032.1	terminator_00008	49808	49846	+	TransTermHP	EFAU004_RS14715	NC_017032.1_transcript2558	TRUE	diff=4,0;high=6,0;low=2,0	diff=5,0;high=9,0;low=4,0	diff=7,0;high=13,0;low=6,0	diff=7,0;high=12,0;low=5,0	diff=7,0;high=13,0;low=6,0	diff=7,0;high=12,0;low=5,0
NC_017032.1	terminator_00009	52236	52258	+	TransTermHP	EFAU004_RS14735	NC_017032.1_transcript2566	TRUE	diff=8,0;high=14,0;low=6,0	diff=14,0;high=18,0;low=4,0	diff=15,0;high=24,0;low=9,0	diff=363,0;high=465,0;low=102,0	diff=208,0;high=294,0;low=86,0	diff=402,5;high=489,5;low=87,0
NC_017032.1	terminator_00000	3820	3837	+	TransTermHP	EFAU004_RS14470	NC_017032.1_transcript2515	FALSE	Not_detect	Not_detect	Not_detect	Not_detect	Not_detect	Not_detect
NC_017032.1	terminator_00001	6189	6212	+	gene_converged	EFAU004_RS14485	NA	FALSE	Not_detect	Not_detect	Not_detect	Not_detect	Not_detect	Not_detect
NC_017032.1	terminator_00002	10751	10773	+	gene_converged	EFAU004_RS14510	NA	FALSE	Not_detect	Not_detect	Not_detect	Not_detect	Not_detect	Not_detect
NC_017032.1	terminator_00003	12789	12830	-	gene_converged;TransTermHP	EFAU004_RS14520	NA	FALSE	Not_detect	Not_detect	Not_detect	Not_detect	Not_detect	Not_detect
NC_017032.1	terminator_00004	12793	12824	+	gene_converged;TransTermHP	EFAU004_RS14515	NA	FALSE	Not_detect	Not_detect	Not_detect	Not_detect	Not_detect	Not_detect
NC_017032.1	terminator_00005	16075	16085	+	TransTermHP	EFAU004_RS14535	NA	FALSE	Not_detect	Not_detect	Not_detect	Not_detect	Not_detect	Not_detect
NC_017032.1	terminator_00006	16432	16463	+	TransTermHP	EFAU004_RS14540	NA	FALSE	Not_detect	Not_detect	Not_detect	Not_detect	Not_detect	Not_detect
NC_017032.1	terminator_00007	23532	23547	+	TransTermHP	EFAU004_RS14555	NA	FALSE	Not_detect	Not_detect	Not_detect	Not_detect	Not_detect	Not_detect
NC_017032.1	terminator_00008	24145	24164	+	TransTermHP	EFAU004_RS14560	NA	FALSE	Not_detect	Not_detect	Not_detect	Not_detect	Not_detect	Not_detect
NC_017032.1	terminator_00009	25298	25319	+	gene_converged	EFAU004_RS14570	NA	FALSE	Not_detect	Not_detect	Not_detect	Not_detect	Not_detect	Not_detect
NC_017032.1	terminator_00010	30418	30444	+	TransTermHP	EFAU004_RS14595	NA	FALSE	Not_detect	Not_detect	Not_detect	Not_detect	Not_detect	Not_detect
NC_017032.1	terminator_00011	33064	33091	+	TransTermHP	EFAU004_RS14610	NA	FALSE	Not_detect	Not_detect	Not_detect	Not_detect	Not_detect	Not_detect
NC_017032.1	terminator_00012	35777	35799	+	TransTermHP	EFAU004_RS14625	NA	FALSE	Not_detect	Not_detect	Not_detect	Not_detect	Not_detect	Not_detect
NC_017032.1	terminator_00013	37364	37384	+	gene_converged	EFAU004_RS14630	NA	FALSE	Not_detect	Not_detect	Not_detect	Not_detect	Not_detect	Not_detect
NC_017032.1	terminator_00014	39688	39699	+	TransTermHP	EFAU004_RS14635	NA	FALSE	Not_detect	Not_detect	Not_detect	Not_detect	Not_detect	Not_detect
NC_017032.1	terminator_00015	49306	49321	-	TransTermHP	EFAU004_RS14720	NA	FALSE	Not_detect	Not_detect	Not_detect	Not_detect	Not_detect	Not_detect
NC_017032.1	terminator_00016	51314	51351	+	TransTermHP	UNK	NA	FALSE	Not_detect	Not_detect	Not_detect	Not_detect	Not_detect	Not_detect
NC_017032.1	terminator_00017	54288	54316	+	TransTermHP	EFAU004_RS14750	NA	FALSE	Not_detect	Not_detect	Not_detect	Not_detect	Not_detect	Not_detect
NC_017032.1	terminator_00018	54721	54760	+	TransTermHP	EFAU004_RS14755	NC_017032.1_transcript2571	FALSE	Not_detect	Not_detect	Not_detect	Not_detect	Not_detect	Not_detect
NC_017032.1	terminator_00019	56184	56209	+	TransTermHP	EFAU004_RS14765	NA	FALSE	Not_detect	Not_detect	Not_detect	Not_detect	Not_detect	Not_detect

## Sheet: E. faecium AUS0004 best
Table S5. Predicted rho-independent terminators
This table lists the best (as determined by expression and coverage decrease) rho-independent terminators predicted by TransTermHP and/or ANNOgesic for E. faecium AUS0004
Genome	Name	Start	End	Strand	Detect	Associated_gene	Associated_transcript	Coverage_decrease	Avg_coverage:ID-005244-0054_1_-TEX_forward/ID-005244-0054_1_-TEX_reverse	Avg_coverage:ID-005245-0054_2_-TEX_forward/ID-005245-0054_2_-TEX_reverse	Avg_coverage:ID-005246-0054_3_-TEX_forward/ID-005246-0054_3_-TEX_reverse	Avg_coverage:ID-005278-0054_1_+TEX_forward/ID-005278-0054_1_+TEX_reverse	Avg_coverage:ID-005279-0054_2_+TEX_forward/ID-005279-0054_2_+TEX_reverse	Avg_coverage:ID-005280-0054_3_+TEX_forward/ID-005280-0054_3_+TEX_reverse
NC_017022.1	terminator_00000	8701	8745	+	TransTermHP	EFAU004_RS00030	NC_017022.1_transcript5	TRUE	diff=8,0;high=14,0;low=6,0	diff=8,0;high=14,0;low=6,0	diff=8,0;high=15,0;low=7,0	diff=12,0;high=22,0;low=10,0	diff=19,0;high=34,0;low=15,0	diff=11,0;high=18,0;low=7,0
NC_017022.1	terminator_00001	10048	10088	+	TransTermHP	EFAU004_RS00045	NC_017022.1_transcript9	TRUE	diff=45,0;high=87,0;low=42,0	diff=57,0;high=112,0;low=55,0	diff=73,0;high=137,0;low=64,0	diff=49,0;high=95,0;low=46,0	diff=39,0;high=74,0;low=35,0	diff=54,0;high=102,0;low=48,0
NC_017022.1	terminator_00003	16710	16740	+	TransTermHP	EFAU004_RS00080	NC_017022.1_transcript18	TRUE	diff=6,0;high=8,0;low=2,0	diff=10,0;high=16,0;low=6,0	diff=8,0;high=11,0;low=3,0	diff=7,0;high=12,0;low=5,0	diff=5,0;high=9,0;low=4,0	diff=2,0;high=3,0;low=1,0
NC_017022.1	terminator_00004	21641	21664	+	gene_converged	transcript_00025	NC_017022.1_transcript25	TRUE	diff=138,0142857147;high=224,872619048;low=86,8583333333	diff=141,11309523800003;high=280,613095238;low=139,5	diff=252,238095238;high=470,888095238;low=218,65	diff=12089,138492099999;high=22302,4373016;low=10213,2988095	diff=9385,41111107;high=17516,581746;low=8131,17063493	diff=12782,3781747;high=24984,9222223;low=12202,5440476
NC_017022.1	terminator_00006	28663	28705	+	gene_converged;TransTermHP	EFAU004_RS00125	NC_017022.1_transcript33	TRUE	diff=2,0;high=3,0;low=1,0	diff=2,0;high=2,0;low=0,0	diff=1,0;high=1,0;low=0,0	diff=5,333333333300001;high=10,3333333333;low=5,0	diff=4,33333333333;high=7,33333333333;low=3,0	diff=5,20833333333;high=7,33333333333;low=2,125
NC_017022.1	terminator_00007	32641	32671	+	TransTermHP	EFAU004_RS00150	NC_017022.1_transcript39	TRUE	diff=15,0;high=26,0;low=11,0	diff=12,0;high=23,0;low=11,0	diff=12,0;high=18,0;low=6,0	diff=9,0;high=15,0;low=6,0	diff=2,0;high=3,0;low=1,0	diff=4,0;high=7,0;low=3,0
NC_017022.1	terminator_00008	43927	43960	-	gene_converged	transcript_00054	NC_017022.1_transcript54	TRUE	Not_detect	diff=1,0;high=1,0;low=0,0	diff=1,0;high=1,0;low=0,0	diff=14,0;high=17,0;low=3,0	diff=26,0;high=46,0;low=20,0	diff=31,0;high=54,0;low=23,0
NC_017022.1	terminator_00009	49470	49493	-	gene_converged	transcript_00063	NC_017022.1_transcript63	TRUE	diff=14,788095238099999;high=28,2320512821;low=13,443956044	diff=19,4652014652;high=35,6956043956;low=16,2304029304	diff=24,0925824176;high=46,7891025641;low=22,6965201465	diff=999,4642857130001;high=1756,14157509;low=756,677289377	diff=736,121428567;high=1331,79935897;low=595,677930403	diff=930,5261904749999;high=1686,40128205;low=755,875091575
NC_017022.1	terminator_00010	51114	51149	+	gene_converged;TransTermHP	EFAU004_RS00225	NC_017022.1_transcript66	TRUE	diff=2,0;high=2,0;low=0,0	diff=3,0;high=5,0;low=2,0	diff=4,0;high=7,0;low=3,0	diff=17,0;high=33,0;low=16,0	diff=12,0;high=22,0;low=10,0	diff=22,0;high=37,0;low=15,0
NC_017022.1	terminator_00013	68650	68686	-	gene_converged;TransTermHP	transcript_00083,EFAU004_RS00320	NC_017022.1_transcript83	TRUE	diff=7,0;high=13,0;low=6,0	diff=6,0;high=11,0;low=5,0	diff=7,0;high=12,0;low=5,0	diff=7,0;high=12,0;low=5,0	diff=5,0;high=9,0;low=4,0	diff=5,0;high=9,0;low=4,0
NC_017022.1	terminator_00014	73194	73223	+	TransTermHP	EFAU004_RS00345	NC_017022.1_transcript87	TRUE	Not_detect	diff=7,0;high=13,0;low=6,0	diff=10,0;high=18,0;low=8,0	diff=4,0;high=7,0;low=3,0	diff=7,0;high=13,0;low=6,0	diff=5,0;high=6,0;low=1,0
NC_017022.1	terminator_00015	74436	74478	-	TransTermHP	EFAU004_RS00355	NC_017022.1_transcript89	TRUE	diff=80,0;high=147,0;low=67,0	diff=107,0;high=188,0;low=81,0	diff=77,0;high=150,0;low=73,0	diff=81,0;high=145,0;low=64,0	diff=71,0;high=138,0;low=67,0	diff=68,0;high=130,0;low=62,0
NC_017022.1	terminator_00016	77897	77934	+	TransTermHP	EFAU004_RS00365	NC_017022.1_transcript92	TRUE	diff=18,0;high=22,0;low=4,0	diff=11,0;high=21,0;low=10,0	diff=18,0;high=24,0;low=6,0	diff=1018,0;high=1022,0;low=4,0	diff=754,0;high=759,0;low=5,0	diff=836,0;high=840,0;low=4,0
NC_017022.1	terminator_00017	79219	79245	+	TransTermHP	EFAU004_RS00370	NA	TRUE	Not_detect	diff=1,0;high=1,0;low=0,0	diff=1,0;high=1,0;low=0,0	diff=15,0;high=15,0;low=0,0	diff=6,0;high=6,0;low=0,0	diff=6,0;high=7,0;low=1,0
NC_017022.1	terminator_00018	82882	82919	+	TransTermHP	EFAU004_RS00390	NC_017022.1_transcript97	TRUE	diff=3,0;high=4,0;low=1,0	diff=8,0;high=13,0;low=5,0	diff=4,0;high=4,0;low=0,0	diff=3,0;high=5,0;low=2,0	diff=2,0;high=3,0;low=1,0	Not_detect
NC_017022.1	terminator_00019	86742	86787	+	TransTermHP	EFAU004_RS00405	NC_017022.1_transcript99	TRUE	diff=43,0;high=46,0;low=3,0	diff=18,0;high=35,0;low=17,0	diff=20,0;high=22,0;low=2,0	diff=13,0;high=24,0;low=11,0	diff=9,0;high=17,0;low=8,0	diff=8,0;high=15,0;low=7,0
NC_017022.1	terminator_00020	89609	89631	+	gene_converged	EFAU004_RS00420	NC_017022.1_transcript102	TRUE	diff=16,0;high=30,0;low=14,0	diff=12,0;high=23,0;low=11,0	diff=10,0;high=19,0;low=9,0	diff=10,0;high=17,0;low=7,0	diff=7,0;high=13,0;low=6,0	diff=6,0;high=11,0;low=5,0
NC_017022.1	terminator_00021	89807	89848	-	gene_converged;TransTermHP	gpmA	NC_017022.1_transcript103	TRUE	diff=8,0;high=14,0;low=6,0	diff=17,0;high=31,0;low=14,0	diff=8,0;high=15,0;low=7,0	diff=6,0;high=10,0;low=4,0	diff=12,0;high=20,0;low=8,0	diff=5,0;high=9,0;low=4,0
NC_017022.1	terminator_00022	90681	90705	-	TransTermHP	EFAU004_RS00430	NC_017022.1_transcript104	TRUE	diff=5,0;high=9,0;low=4,0	diff=8,0;high=12,0;low=4,0	diff=11,0;high=16,0;low=5,0	diff=8,0;high=10,0;low=2,0	diff=4,0;high=6,0;low=2,0	diff=4,0;high=7,0;low=3,0
NC_017022.1	terminator_00023	96985	97020	+	TransTermHP	EFAU004_RS00455	NC_017022.1_transcript105	TRUE	diff=47,0;high=87,0;low=40,0	diff=69,0;high=132,0;low=63,0	diff=70,0;high=136,0;low=66,0	diff=42,0;high=82,0;low=40,0	diff=65,0;high=112,0;low=47,0	diff=59,0;high=111,0;low=52,0
NC_017022.1	terminator_00024	107943	107991	+	TransTermHP	EFAU004_RS00565	NC_017022.1_transcript106	TRUE	Not_detect	diff=139,0;high=274,0;low=135,0	Not_detect	diff=89,0;high=173,0;low=84,0	Not_detect	diff=64,0;high=123,0;low=59,0
NC_017022.1	terminator_00025	108781	108802	+	TransTermHP	EFAU004_RS00570	NC_017022.1_transcript106	TRUE	Not_detect	diff=397,0;high=785,0;low=388,0	Not_detect	diff=30225,0;high=30546,0;low=321,0	diff=22059,0;high=22283,0;low=224,0	diff=29623,0;high=29905,0;low=282,0
NC_017022.1	terminator_00026	111576	111633	+	TransTermHP	EFAU004_RS00600	NC_017022.1_transcript106	TRUE	diff=11,0;high=20,0;low=9,0	diff=17,0;high=33,0;low=16,0	diff=34,0;high=49,0;low=15,0	diff=44,0;high=85,0;low=41,0	diff=30,0;high=55,0;low=25,0	diff=32,0;high=62,0;low=30,0
NC_017022.1	terminator_00027	114270	114297	+	TransTermHP	EFAU004_RS00615	NC_017022.1_transcript109	TRUE	diff=11,0;high=20,0;low=9,0	diff=10,0;high=17,0;low=7,0	diff=14,0;high=27,0;low=13,0	diff=11,0;high=21,0;low=10,0	diff=11,0;high=19,0;low=8,0	diff=9,0;high=17,0;low=8,0
NC_017022.1	terminator_00028	115400	115461	-	gene_converged;TransTermHP	transcript_00110,EFAU004_RS00625	NC_017022.1_transcript110	TRUE	diff=18,0;high=34,0;low=16,0	diff=21,0;high=41,0;low=20,0	diff=16,0;high=31,0;low=15,0	diff=18,0;high=35,0;low=17,0	diff=16,0;high=31,0;low=15,0	diff=15,0;high=28,0;low=13,0
NC_017022.1	terminator_00029	118283	118316	-	gene_converged	transcript_00112,EFAU004_RS14880	NC_017022.1_transcript112	TRUE	diff=13,0;high=20,0;low=7,0	diff=11,0;high=21,0;low=10,0	diff=15,0;high=28,0;low=13,0	diff=70,428571429;high=122,428571429;low=52,0	diff=55,0;high=83,0;low=28,0	diff=69,0;high=131,0;low=62,0
NC_017022.1	terminator_00030	120974	121014	+	TransTermHP	EFAU004_RS00640	NC_017022.1_transcript113	TRUE	diff=34,0;high=66,0;low=32,0	diff=41,0;high=79,0;low=38,0	diff=48,0;high=95,0;low=47,0	diff=26,0;high=45,0;low=19,0	diff=28,0;high=54,0;low=26,0	diff=18,0;high=34,0;low=16,0
NC_017022.1	terminator_00033	136896	136933	+	gene_converged;TransTermHP	transcript_00120,EFAU004_RS00700	NC_017022.1_transcript120	TRUE	diff=10,0;high=16,0;low=6,0	diff=19,0;high=30,0;low=11,0	diff=18,0;high=35,0;low=17,0	diff=21,0;high=38,0;low=17,0	diff=23,0;high=43,0;low=20,0	diff=14,0;high=23,0;low=9,0
NC_017022.1	terminator_00034	139339	139427	+	gene_converged;TransTermHP	EFAU004_RS00705	NC_017022.1_transcript123	TRUE	diff=4,0;high=6,0;low=2,0	diff=4,0;high=6,0;low=2,0	diff=4,0;high=7,0;low=3,0	diff=6,0;high=11,0;low=5,0	diff=2,0;high=3,0;low=1,0	diff=2,0;high=3,0;low=1,0
NC_017022.1	terminator_00035	144166	144190	-	gene_converged	EFAU004_RS00735	NC_017022.1_transcript128	TRUE	diff=6,5;high=12,0;low=5,5	diff=10,0;high=19,0;low=9,0	diff=20,0;high=36,0;low=16,0	diff=2,0;high=3,0;low=1,0	diff=8,0;high=14,0;low=6,0	diff=12,0;high=23,0;low=11,0
NC_017022.1	terminator_00036	146277	146307	+	TransTermHP	EFAU004_RS00745	NC_017022.1_transcript130	TRUE	diff=28,0;high=53,0;low=25,0	diff=42,0;high=79,0;low=37,0	diff=28,0;high=52,0;low=24,0	diff=69,0;high=102,0;low=33,0	diff=67,5;high=97,5;low=30,0	diff=46,0;high=63,0;low=17,0
NC_017022.1	terminator_00037	151661	151687	-	gene_converged	transcript_00136	NC_017022.1_transcript136	TRUE	diff=10,18333333336;high=19,1777777778;low=8,99444444444	diff=14,05;high=26,6333333333;low=12,5833333333	diff=18,2777777778;high=36,0666666667;low=17,7888888889	diff=1267,517676764;high=2099,67323232;low=832,155555556	diff=0,333333333334;high=0,555555555556;low=0,222222222222	diff=1256,4060606009998;high=2117,04494949;low=860,638888889
NC_017022.1	terminator_00039	155028	155053	+	gene_converged	transcript_00140	NC_017022.1_transcript140	TRUE	diff=14,788095238099999;high=28,5415750916;low=13,7534798535	diff=19,2509157509;high=35,6956043956;low=16,4446886447	diff=24,5175824176;high=46,6641025641;low=22,1465201465	diff=1021,2190476179999;high=1784,61062271;low=763,391575092	diff=753,0154761890001;high=1353,61602564;low=600,600549451	diff=951,1571428569999;high=1713,27032967;low=762,113186813
NC_017022.1	terminator_00040	155070	155126	-	gene_converged;TransTermHP	EFAU004_RS00790	NC_017022.1_transcript141	TRUE	diff=13,0;high=20,0;low=7,0	diff=8,0;high=10,0;low=2,0	diff=15,0;high=20,0;low=5,0	diff=16,0;high=28,0;low=12,0	diff=8,0;high=15,0;low=7,0	diff=11,0;high=17,0;low=6,0
NC_017022.1	terminator_00042	160793	160835	+	gene_converged;TransTermHP	EFAU004_RS00820	NC_017022.1_transcript149	TRUE	diff=5,0;high=6,0;low=1,0	diff=1,0;high=1,0;low=0,0	diff=2,0;high=2,0;low=0,0	diff=4,0;high=6,0;low=2,0	diff=5,0;high=6,0;low=1,0	diff=12,0;high=14,0;low=2,0
NC_017022.1	terminator_00043	161475	161500	-	TransTermHP	EFAU004_RS00830	NC_017022.1_transcript151	TRUE	diff=13,0;high=24,0;low=11,0	diff=12,0;high=22,0;low=10,0	diff=19,25;high=33,25;low=14,0	diff=23,0;high=40,0;low=17,0	diff=19,0;high=34,0;low=15,0	diff=25,0;high=47,0;low=22,0
NC_017022.1	terminator_00044	164745	164784	+	gene_converged	EFAU004_RS00845	NC_017022.1_transcript154	TRUE	diff=9,0;high=16,0;low=7,0	diff=11,0;high=21,0;low=10,0	diff=10,0;high=19,0;low=9,0	Not_detect	diff=7,0;high=12,0;low=5,0	diff=6,0;high=11,0;low=5,0
NC_017022.1	terminator_00045	171634	171696	+	gene_converged;TransTermHP	EFAU004_RS00870	NC_017022.1_transcript156	TRUE	diff=5,0;high=8,0;low=3,0	diff=2,0;high=2,0;low=0,0	diff=6,0;high=10,0;low=4,0	diff=4,0;high=7,0;low=3,0	diff=8,0;high=14,0;low=6,0	diff=5,0;high=7,0;low=2,0
NC_017022.1	terminator_00046	175183	175220	+	TransTermHP	EFAU004_RS00885	NC_017022.1_transcript159	TRUE	diff=2,0;high=2,0;low=0,0	diff=3,0;high=5,0;low=2,0	diff=8,0;high=14,0;low=6,0	diff=8,0;high=14,0;low=6,0	diff=9,0;high=17,0;low=8,0	diff=7,0;high=12,0;low=5,0
NC_017022.1	terminator_00047	178872	178884	+	TransTermHP	EFAU004_RS00910	NC_017022.1_transcript162	TRUE	diff=24,0;high=40,0;low=16,0	diff=21,5;high=32,5;low=11,0	diff=47,0;high=60,0;low=13,0	Not_detect	Not_detect	Not_detect
NC_017022.1	terminator_00048	180347	180395	+	gene_converged;TransTermHP	transcript_00164	NC_017022.1_transcript164	TRUE	Not_detect	diff=2,0;high=2,0;low=0,0	diff=3,0;high=5,0;low=2,0	diff=22,0;high=43,0;low=21,0	diff=22,0;high=31,0;low=9,0	diff=21,0;high=28,0;low=7,0
NC_017022.1	terminator_00049	180473	180495	-	gene_converged	transcript_00165,EFAU004_RS00920	NC_017022.1_transcript165	TRUE	diff=12,0;high=22,0;low=10,0	diff=7,0;high=13,0;low=6,0	diff=9,0;high=16,0;low=7,0	diff=7,0;high=13,0;low=6,0	diff=4,16666666667;high=8,16666666667;low=4,0	diff=4,0;high=6,0;low=2,0
NC_017022.1	terminator_00050	182689	182735	-	gene_converged	EFAU004_RS00930	NC_017022.1_transcript168	TRUE	diff=12,0;high=20,0;low=8,0	diff=7,0;high=12,0;low=5,0	diff=10,0;high=17,0;low=7,0	diff=12,0;high=18,0;low=6,0	diff=22,0;high=23,0;low=1,0	diff=11,0;high=13,0;low=2,0
NC_017022.1	terminator_00051	184235	184258	-	TransTermHP	EFAU004_RS00935	NC_017022.1_transcript169	TRUE	diff=11,0;high=18,0;low=7,0	diff=13,0;high=24,0;low=11,0	diff=9,0;high=17,0;low=8,0	diff=21,0;high=39,0;low=18,0	diff=21,0;high=38,0;low=17,0	diff=11,0;high=19,0;low=8,0
NC_017022.1	terminator_00052	191103	191124	+	TransTermHP	EFAU004_RS00975	NC_017022.1_transcript180	TRUE	diff=69,0;high=137,0;low=68,0	diff=89,0;high=174,0;low=85,0	diff=69,0;high=129,0;low=60,0	diff=69,0;high=132,0;low=63,0	diff=57,0;high=111,0;low=54,0	diff=55,0;high=107,0;low=52,0
NC_017022.1	terminator_00053	193562	193584	-	gene_converged	transcript_00182	NC_017022.1_transcript182	TRUE	diff=1,0;high=1,0;low=0,0	Not_detect	diff=1,0;high=1,0;low=0,0	diff=24,027027027;high=24,027027027;low=0,0	diff=12,000000000033;high=12,1666666667;low=0,166666666667	diff=24,0;high=24,0;low=0,0
NC_017022.1	terminator_00054	197846	197887	+	gene_converged;TransTermHP	EFAU004_RS00995	NC_017022.1_transcript186	TRUE	diff=2,0;high=3,0;low=1,0	diff=3,0;high=4,0;low=1,0	diff=5,0;high=8,0;low=3,0	diff=47,0;high=48,0;low=1,0	diff=47,5;high=50,0;low=2,5	diff=35,0;high=37,0;low=2,0
NC_017022.1	terminator_00055	199450	199483	-	TransTermHP	EFAU004_RS01005	NC_017022.1_transcript188	TRUE	diff=16,0;high=26,0;low=10,0	diff=26,0;high=48,0;low=22,0	diff=24,0;high=47,0;low=23,0	diff=19,0;high=34,0;low=15,0	diff=20,0;high=36,0;low=16,0	diff=18,0;high=34,0;low=16,0
NC_017022.1	terminator_00056	200118	200158	-	TransTermHP	EFAU004_RS01010	NC_017022.1_transcript189	TRUE	diff=60,0;high=112,0;low=52,0	diff=115,0;high=225,0;low=110,0	diff=86,0;high=155,0;low=69,0	diff=108,0;high=196,0;low=88,0	diff=130,0;high=243,0;low=113,0	diff=119,0;high=206,0;low=87,0
NC_017022.1	terminator_00057	203281	203304	+	gene_converged	EFAU004_RS01025	NC_017022.1_transcript191	TRUE	diff=9,0;high=16,0;low=7,0	diff=10,0;high=18,0;low=8,0	diff=20,0;high=38,0;low=18,0	diff=8,0;high=15,0;low=7,0	diff=9,0;high=12,0;low=3,0	diff=7,0;high=10,0;low=3,0
NC_017022.1	terminator_00058	203283	203304	-	gene_converged	transcript_00192	NC_017022.1_transcript192	TRUE	diff=3,0;high=4,0;low=1,0	diff=1,0;high=1,0;low=0,0	diff=0,999999999999;high=1,11111111111;low=0,111111111111	diff=47,0;high=47,5;low=0,5	diff=33,0;high=33,25;low=0,25	diff=29,0;high=32,25;low=3,25
[truncated: 594 more rows]

## Sheet: E. faecalis V583 all
Table S5. Predicted rho-independent terminators
[truncated: 1,945 more rows]

## Sheet: E. faecalis V583 best
Table S6. Predicted rho-independent terminators
[truncated: 607 more rows]
