# Supplementary material for: Single-Nucleotide RNA Maps for the Two Major Nosocomial Pathogens Enterococcus faecalis and Enterococcus faecium
Source: Front Cell Infect Microbiol. 2020 Nov 25;10:600325. doi: 10.3389/fcimb.2020.600325 (PMC7724050; doi:10.3389/fcimb.2020.600325)
Supplement: Supplementary Table 7 — Predicted sRNAs. [file Table_7.xlsx]

## Sheet: E. faecalis V583
Table S7. Predicted sRNAs - E. faecalis V583
This table lists all sRNAs predicted by ANNOgesic from TSS in E. faecalis V583 (chromosome and plasmids)
Associated promoters were identified using MEME
Rank	Genome	Name	Start	End	Strand	Start_with_TSS	Candidates	Lib_type	sRNA type (manual)	sRNA_length	Best_avg_coverage	Normalized_secondary_energy_change(by_length)	new in this study	Overlap_CDS_forward	Overlap_nts_forward	Overlap_CDS_reverse	Overlap_nts_reverse	End_with_terminator	Associated_promoter	Avg_coverage:ID-005241-V583_4_-TEX_forward/ID-005241-V583_4_-TEX_reverse	Avg_coverage:ID-005242-V583_5_-TEX_forward/ID-005242-V583_5_-TEX_reverse	Avg_coverage:ID-005243-V583_6_-TEX_forward/ID-005243-V583_6_-TEX_reverse	Avg_coverage:ID-005275-V583_4_+TEX_forward/ID-005275-V583_4_+TEX_reverse	Avg_coverage:ID-005276-V583_5_+TEX_forward/ID-005276-V583_5_+TEX_reverse	Avg_coverage:ID-005277-V583_6_+TEX_forward/ID-005277-V583_6_+TEX_reverse
65	NC_004668.1	sRNA_000	55464	55553	-	TSS:55553_-	55464-55553	TEX+/-	5'UTR	89	4124.91	-0.21	yes	NA	NA	NP_816989,1	90(100%)	NA	NHNTTGAHWWWWWDHDNWWWWTATGKTATAATWWA	55.9333	69.2	60.8933	3455.87	2972.44	4124.91
80	NC_004668.1	sRNA_001	61327	61400	+	TSS:61327_+	61327-61400	TEX+/-	5'UTR	73	2882.5	-0.1851	yes	NP_816998.1	62(84%)	NA	NA	NA	NHNTTGAHWWWWWDHDNWWWWTATGKTATAATWWA	46.0541	73.6351	83.0811	1932.7	1984.93	2882.5
123	NC_004668.1	sRNA_002	74538	74612	-	TSS:74612_-	74538-74612	TEX+/-	Antisense	74	361.627	-0.116	yes	NA	NA	NA	NA	NA	NHNTTGAHWWWWWDHDNWWWWTATGKTATAATWWA	37.9733	64.68	40.88	361.627	344.147	328.28
89	NC_004668.1	sRNA_003	129566	129651	-	TSS:129651_-	129566-129651	TEX+/-	Antisense	85	2252.32	-0.3628	yes	NP_813928.1	7(8%)	NA	NA	NA	NHNTTGAHWWWWWDHDNWWWWTATGKTATAATWWA	49.4772	71.7297	47.6426	2252.32	2198.39	1693.64
81	NC_004668.1	sRNA_004	133904	133979	+	TSS:133904_+	133904-133979	TEX+/-	Intergenic	75	2750.92	-0.1882	no	NA	NA	NA	NA	NA	NHNTTGAHWWWWWDHDNWWWWTATGKTATAATWWA	136.342	196.421	179.184	2739.49	2727.72	2750.92
3	NC_004668.1	sRNA_005	133943	134025	-	TSS:134025_-	133943-134025	TEX+/-	Intergenic	82	314050	-0.2313	no	NA	NA	NA	NA	NA	NHNTTGAHWWWWWDHDNWWWWTATGKTATAATWWA	1873.13	3837.69	2447.53	250837	309588	314050
138	NC_004668.1	sRNA_006	134063	134365	+	TSS:134063_+	134063-134365	TEX+/-	Intergenic	302	124.465	-0.2251	no	NA	NA	NA	NA	NA	NHNTTGAHWWWWWDHDNWWWWTATGKTATAATWWA	117.046	112.545	111.964	124.465	116.284	123.241
68	NC_004668.1	sRNA_007	146029	146165	-	TSS:146165_-	146029-146165	TEX+/-	Antisense	136	3863.16	-0.2825	no	NP_813950.1	131(96%)	NA	NA	NA	NHNTTGAHWWWWWDHDNWWWWTATGKTATAATWWA	142.4	141.525	117.617	3706.42	3863.16	3336.4
105	NC_004668.1	sRNA_008	146182	146273	-	TSS:146273_-	146182-146273	TEX+/-	Intergenic	91	1232.47	-0.1946	no	NA	NA	NA	NA	NA	NHNTTGAHWWWWWDHDNWWWWTATGKTATAATWWA	56.88	72.7333	63.9467	1027.83	1232.47	1109.83
23	NC_004668.1	sRNA_009	198331	198497	+	TSS:198331_+	198331-198497	TEX+/-	5'UTR	166	24268.6	-0.2904	yes	NA	NA	NA	NA	NA	NHNTTGAHWWWWWDHDNWWWWTATGKTATAATWWA	688.413	604.599	526.749	16709.4	20171.6	24268.6
114	NC_004668.1	sRNA_010	224560	224899	-	TSS:224819_-;TSS:224899_-	224560-224899;224819-224899	TEX+/-	Intergenic	339	648.735	-0.2853	no	NA	NA	NA	NA	NA	NHNTTGAHWWWWWDHDNWWWWTATGKTATAATWWA	102.703	107.275	103.569	495.396	522.495	648.735
110	NC_004668.1	sRNA_011	255799	255911	+	TSS:255799_+	255799-255911	TEX+/-	Intergenic	112	1032.17	-0.2549	yes	NA	NA	NA	NA	NA	NHNTTGAHWWWWWDHDNWWWWTATGKTATAATWWA	45.9111	37.8	34.5778	1032.17	683.611	714.378
28	NC_004668.1	sRNA_012	294407	294480	-	TSS:294480_-	294407-294480	TEX+/-	Antisense	73	21635.5	-0.277	no	id29	74(100%)	NA	NA	NA	NHNTTGAHWWWWWDHDNWWWWTATGKTATAATWWA	80.027	205.27	113.135	21635.5	21377.1	19420.1
59	NC_004668.1	sRNA_013	346023	346098	+	TSS:346023_+	346023-346098	TEX+/-	5'UTR	75	5182.47	-0.125	yes	NA	NA	NA	NA	NA	NHNTTGAHWWWWWDHDNWWWWTATGKTATAATWWA	50.2632	50.7237	93.5658	2293.35	2377.13	5182.47
49	NC_004668.1	sRNA_014	367328	367566	+	TSS:367328_+	367328-367566	TEX+/-	5'UTR	238	9542.33	-0.2238	no	NA	NA	NA	NA	NA	NHNTTGAHWWWWWDHDNWWWWTATGKTATAATWWA	97.2946	150.464	169	4308.06	6748.04	9542.33
58	NC_004668.1	sRNA_015	373279	373358	+	TSS:373279_+	373279-373358	TEX+/-	5'UTR	79	5637.84	-0.1337	yes	NA	NA	NA	NA	NA	NHNTTGAHWWWWWDHDNWWWWTATGKTATAATWWA	191.125	230.725	176.65	5149.51	5637.84	5569.02
62	NC_004668.1	sRNA_016	381640	381713	+	TSS:381640_+	381640-381713	TEX+/-	Antisense	73	4889.68	-0.3757	yes	NA	NA	NA	NA	terminator:381676-381699_+	NHNTTGAHWWWWWDHDNWWWWTATGKTATAATWWA	39.3378	71.4189	51.2838	4007.78	4889.68	4684.34
10	NC_004668.1	sRNA_017	450001	450081	-	TSS:450074_-;TSS:450081_-	450001-450081	TEX+/-	Antisense	80	60166.1	-0.2148	yes	NA	NA	NA	NA	NA	NHNTTGAHWWWWWDHDNWWWWTATGKTATAATWWA	454.951	1046.26	546.963	45244.4	60166.1	52011.7
100	NC_004668.1	sRNA_018	484464	484557	-	TSS:484557_-	484464-484557	TEX+/-	5'UTR	93	1603.72	-0.1638	yes	NA	NA	NA	NA	NA	NHNTTGAHWWWWWDHDNWWWWTATGKTATAATWWA	61.0385	70.5897	53.359	1366.88	1502.36	1603.72
90	NC_004668.1	sRNA_019	488924	489009	-	TSS:489009_-	488924-489009	TEX+/-	Antisense	85	2252.32	-0.3628	yes	NP_814305.1	7(8%)	NA	NA	NA	NHNTTGAHWWWWWDHDNWWWWTATGKTATAATWWA	49.4772	71.2867	47.6426	2252.32	2198.39	1693.41
95	NC_004668.1	sRNA_020	493276	493352	-	TSS:493352_-	493276-493352	TEX+/-	5'UTR	76	2068.38	-0.0506	yes	NA	NA	NA	NA	NA	NHNTTGAHWWWWWDHDNWWWWTATGKTATAATWWA	43.1169	42.3896	35.2597	2068.38	1872.21	2012.69
72	NC_004668.1	sRNA_021	505477	505555	+	TSS:505477_+	505477-505555	TEX+/-	Intergenic	78	3387.36	-0.2182	no	NA	NA	NA	NA	terminator:505561-505592_+	NHNTTGAHWWWWWDHDNWWWWTATGKTATAATWWA	162	176.263	130.171	3387.36	2793.89	2707.05
147	NC_004668.1	sRNA_022	505768	505873	+	TSS:505768_+	505768-505873	TEX+/-	Intergenic	105	69.6321	-0.1934	yes	NA	NA	NA	NA	NA	NHNTTGAHWWWWWDHDNWWWWTATGKTATAATWWA	32.2358	28.3585	25.1226	69.6321	62.9528	60.1038
150	NC_004668.1	sRNA_023	519328	519508	+	TSS:519328_+	519328-519508	TEX+/-	Intergenic	180	8.55758	-0.1403	yes	NA	NA	NA	NA	NA	NHNTTGAHWWWWWDHDNWWWWTATGKTATAATWWA	2.39394	5.18182	0.454545	8.55758	6.86667	6.89697
136	NC_004668.1	sRNA_024	519888	519960	+	TSS:519888_+	519888-519960	TEX+/-	Intergenic	72	133.945	-0.1014	yes	NA	NA	NA	NA	NA	NHNTTGAHWWWWWDHDNWWWWTATGKTATAATWWA	13.3836	6.64384	8.0411	123.315	133.945	128.918
118	NC_004668.1	sRNA_025	527168	527242	+	TSS:527168_+	527168-527242	TEX+/-	5'UTR and antisense	74	537.44	-0.328	yes	NP_814335.1	4(5%)	NA	NA	NA	NHNTTGAHWWWWWDHDNWWWWTATGKTATAATWWA	35.0933	57.24	55.2933	299.28	428.827	537.44
55	NC_004668.1	sRNA_026	531797	531948	+	TSS:531797_+	531797-531948	TEX+/-	Intergenic	151	6398.89	-0.2559	no	NA	NA	NA	NA	NA	NHNTTGAHWWWWWDHDNWWWWTATGKTATAATWWA	564.707	514.133	480.643	6398.89	5632.32	4441.66
43	NC_004668.1	sRNA_027	532495	532604	-	TSS:532604_-	532495-532604	TEX+/-	Intergenic	109	10923.5	-0.3509	no	NA	NA	NA	NA	NA	NHNTTGAHWWWWWDHDNWWWWTATGKTATAATWWA	93.6562	113.698	78.3229	10923.5	10846.3	9906.42
109	NC_004668.1	sRNA_028	533444	533580	-	TSS:533580_-	533444-533580	TEX+/-	Intergenic	136	1075.48	-0.1898	no	NA	NA	NA	NA	NA	NHNTTGAHWWWWWDHDNWWWWTATGKTATAATWWA	68.5821	60.9801	82.8134	905.442	877.423	1075.48
85	NC_004668.1	sRNA_029	533615	533767	-	TSS:533767_-	533615-533767	TEX+/-	Intergenic	152	2353	-0.2399	no	NA	NA	NA	NA	NA	NHNTTGAHWWWWWDHDNWWWWTATGKTATAATWWA	497.691	497.794	483.892	2353	1876.62	1761.39
67	NC_004668.1	sRNA_030	560878	560952	+	TSS:560878_+	560878-560952	TEX+/-	Intergenic	74	3967.33	-0.2013	no	NA	NA	NA	NA	terminator:560970-561020_+	NHNTTGAHWWWWWDHDNWWWWTATGKTATAATWWA	54.2267	62.48	45.2933	3701.2	3680.65	3967.33
70	NC_004668.1	sRNA_031	561021	561101	-	TSS:561101_-	561021-561101	TEX+/-	Intergenic	80	3559.26	-0.2778	no	NA	NA	NA	NA	NA	NHNTTGAHWWWWWDHDNWWWWTATGKTATAATWWA	151.148	186.309	156.191	3559.26	3287.94	3142.58
30	NC_004668.1	sRNA_032	569154	569373	+	TSS:569154_+;TSS:569236_+	569154-569373;569236-569373	TEX+/-	Intergenic	219	19732.5	-0.2786	no	NA	NA	NA	NA	NA	NHNTTGAHWWWWWDHDNWWWWTATGKTATAATWWA	265.718	340.906	297.958	18244.7	18767.2	19732.5
17	NC_004668.1	sRNA_033	587020	587237	+	TSS:587020_+	587020-587237	TEX+/-	5'UTR	217	30386.9	-0.1807	yes	NA	NA	NA	NA	NA	NHNTTGAHWWWWWDHDNWWWWTATGKTATAATWWA	1100.84	1290.01	1373.69	19501.4	23388	30386.9
20	NC_004668.1	sRNA_034	611263	611363	+	TSS:611263_+	611263-611363	TEX+/-	5'UTR	100	28218.8	-0.2653	no	NA	NA	NA	NA	NA	NHNTTGAHWWWWWDHDNWWWWTATGKTATAATWWA	143.219	232.292	131.969	28218.8	25557.2	22388.1
129	NC_004668.1	sRNA_035	632507	632601	+	TSS:632507_+	632507-632601	TEX+/-	5'UTR	94	237.056	-0.1505	yes	NA	NA	NA	NA	NA	NHNTTGAHWWWWWDHDNWWWWTATGKTATAATWWA	32.2917	35.2222	39.4028	237.056	228.042	234.583
132	NC_004668.1	sRNA_036	681429	681568	-	TSS:681568_-	681429-681568	TEX+/-	Antisense	139	157.407	-0.2664	no	NP_814473.1	23(16%)	NA	NA	NA	NHNTTGAHWWWWWDHDNWWWWTATGKTATAATWWA	54.1024	90.4659	56.8996	157.407	126.371	117.791
149	NC_004668.1	sRNA_037	703864	704201	+	TSS:703864_+	703864-704201	TEX+/-	Intergenic	337	45.9421	-0.3095	no	NA	NA	NA	NA	NA	NA	34.4238	45.9421	43.8309	31.2683	31.3376	38.7191
115	NC_004668.1	sRNA_038	767561	767822	-	TSS:767822_-	767561-767822	TEX+/-	5'UTR	261	631.481	-0.2901	no	NA	NA	NA	NA	NA	NHNTTGAHWWWWWDHDNWWWWTATGKTATAATWWA	180.6	226.481	241.077	436.617	464.609	631.481
14	NC_004668.1	sRNA_039	784239	784369	-	TSS:784369_-	784239-784369	TEX+/-	5'UTR	130	43577.3	-0.255	no	NA	NA	NA	NA	NA	NHNTTGAHWWWWWDHDNWWWWTATGKTATAATWWA	996.571	1619.07	1285.16	31736.8	39266.9	43577.3
12	NC_004668.1	sRNA_040	788993	789207	+	TSS:788993_+	788993-789207	TEX+/-	Intergenic	214	48325.7	-0.3302	no	NA	NA	NA	NA	terminator:789166-789203_+	NHNTTGAHWWWWWDHDNWWWWTATGKTATAATWWA	390.928	480.635	480.212	32226.1	34985	48325.7
128	NC_004668.1	sRNA_041	826028	826366	+	TSS:826028_+	826028-826366	TEX+/-	Intergenic	338	282.244	-0.3274	no	NA	NA	NA	NA	NA	NHNTTGAHWWWWWDHDNWWWWTATGKTATAATWWA	265.389	282.244	265.946	196.732	184.16	186.542
116	NC_004668.1	sRNA_042	826028	826154	-	TSS:826154_-	826028-826154	TEX+/-	Intergenic	126	619.919	-0.3693	yes	NA	NA	NA	NA	terminator:826053-826091_-	NHNTTGAHWWWWWDHDNWWWWTATGKTATAATWWA	75.5741	79.6235	72.0787	619.919	422.959	367.613
32	NC_004668.1	sRNA_043	828523	828629	+	TSS:828523_+	828523-828629	TEX+/-	Intergenic	106	18119.5	-0.2196	yes	NA	NA	NA	NA	terminator:828631-828679_+	NHNTTGAHWWWWWDHDNWWWWTATGKTATAATWWA	287.505	279.196	336.57	17248.9	13078.5	18119.5
96	NC_004668.1	sRNA_044	829237	829523	-	TSS:829523_-	829237-829523	TEX+/-	Intergenic	286	1961.1	-0.1784	no	NA	NA	NA	NA	NA	NHNTTGAHWWWWWDHDNWWWWTATGKTATAATWWA	60.6411	65.6655	92.1551	1270.25	1135.71	1961.1
126	NC_004668.1	sRNA_045	847973	848068	+	TSS:847973_+	847973-848068	TEX+/-	5'UTR	95	330.145	-0.1552	yes	NA	NA	NA	NA	NA	NHNTTGAHWWWWWDHDNWWWWTATGKTATAATWWA	53.8421	52.1579	45.5658	268.566	316	330.145
75	NC_004668.1	sRNA_046	864050	864122	+	TSS:864050_+	864050-864122	TEX+/-	5'UTR	72	3184.42	-0.0644	yes	NA	NA	NA	NA	NA	NHNTTGAHWWWWWDHDNWWWWTATGKTATAATWWA	211.055	181.137	34.4932	3184.42	3151.01	931.397
134	NC_004668.1	sRNA_048	910239	910312	+	TSS:910239_+	910239-910312	TEX+/-	5'UTR	73	154.23	-0.2743	yes	NA	NA	NA	NA	terminator:910249-910283_+	NHNTTGAHWWWWWDHDNWWWWTATGKTATAATWWA	34.8649	46.9054	31.0135	154.23	145.689	127.635
76	NC_004668.1	sRNA_049	944421	944496	+	TSS:944421_+	944421-944496	TEX+/-	Intergenic	75	3164.97	-0.1618	yes	NA	NA	NA	NA	NA	NHNTTGAHWWWWWDHDNWWWWTATGKTATAATWWA	48.7237	69.7763	44.2632	1796.54	2261.96	3164.97
33	NC_004668.1	sRNA_050	1018018	1018142	+	TSS:1018018_+	1018018-1018142	TEX+/-	5'UTR	124	17784.3	-0.2104	yes	NA	NA	NA	NA	NA	NHNTTGAHWWWWWDHDNWWWWTATGKTATAATWWA	13795.2	13289.3	17784.3	11020.1	8431.68	10372
102	NC_004668.1	sRNA_051	1024721	1024861	-	TSS:1024861_-	1024721-1024861	TEX+/-	Intergenic	140	1518.15	-0.2206	no	NA	NA	NA	NA	NA	NHNTTGAHWWWWWDHDNWWWWTATGKTATAATWWA	51.8014	80.1773	93.5319	1034.17	1182.87	1518.15
29	NC_004668.1	sRNA_052	1053411	1053484	-	TSS:1053484_-	1053411-1053484	TEX+/-	Intergenic	73	20641.4	-0.2243	yes	NA	NA	NA	NA	NA	NHNTTGAHWWWWWDHDNWWWWTATGKTATAATWWA	189.77	363.892	305.284	13353.6	18291.6	20641.4
104	NC_004668.1	sRNA_053	1057189	1057314	+	TSS:1057189_+	1057189-1057314	TEX+/-	5'UTR	125	1363.18	-0.1198	yes	NA	NA	NA	NA	NA	NHNTTGAHWWWWWDHDNWWWWTATGKTATAATWWA	48.881	32.5	35.3175	1363.18	886.754	908.706
44	NC_004668.1	sRNA_054	1066889	1067284	-	TSS:1067109_-;TSS:1067284_-	1066889-1067284;1067109-1067284	TEX+/-	Intergenic	395	10421.3	-0.2929	no	NA	NA	NA	NA	terminator:1066822-1066871_-	NHNTTGAHWWWWWDHDNWWWWTATGKTATAATWWA	3218.1	3515.23	4655.58	7858.11	6606.36	10421.3
130	NC_004668.1	sRNA_055	1108010	1108122	+	TSS:1108010_+;TSS:1108039_+	1108010-1108122;1108039-1108122	TEX+/-	Antisense	112	232.223	-0.1035	yes	NA	NA	NP_814866,1	97(86%)	NA	NHNTTGAHWWWWWDHDNWWWWTATGKTATAATWWA	56.7201	62.7573	74.9536	153.728	146.583	232.223
111	NC_004668.1	sRNA_056	1120712	1120786	+	TSS:1120712_+	1120712-1120786	TEX+/-	5'UTR and antisense	74	920.667	-0.18	yes	NA	NA	NP_814879,1	31(41%)	NA	NHNTTGAHWWWWWDHDNWWWWTATGKTATAATWWA	45.1867	64.5733	91.8	515.453	598.107	920.667
84	NC_004668.1	sRNA_057	1142562	1142636	+	TSS:1142562_+	1142562-1142636	TEX+/-	5'UTR	74	2447.37	-0.0933	yes	NA	NA	NA	NA	NA	NHNTTGAHWWWWWDHDNWWWWTATGKTATAATWWA	177.2	131.4	114.853	2447.37	2095.57	2414.93
27	NC_004668.1	sRNA_058	1170391	1170546	-	TSS:1170546_-	1170391-1170546	TEX+/-	Intergenic	155	21806.5	-0.3192	no	NA	NA	NA	NA	NA	NHNTTGAHWWWWWDHDNWWWWTATGKTATAATWWA	408.26	539.09	383.447	21806.5	19663	20187.6
78	NC_004668.1	sRNA_059	1216034	1216182	-	TSS:1216129_-;TSS:1216182_-	1216034-1216182;1216129-1216182	TEX+/-	Intergenic	148	3081.52	-0.2718	no	NA	NA	NA	NA	NA	NHNTTGAHWWWWWDHDNWWWWTATGKTATAATWWA	272.088	265.419	241.596	3081.52	2216.65	1790.64
60	NC_004668.1	sRNA_060	1220621	1220831	+	TSS:1220621_+	1220621-1220831	TEX+/-	Intergenic	210	5173.1	-0.2957	no	NA	NA	NA	NA	NA	NHNTTGAHWWWWWDHDNWWWWTATGKTATAATWWA	437.691	498.754	471.614	4694.11	5173.1	4754.72
57	NC_004668.1	sRNA_061	1260089	1260166	+	TSS:1260089_+	1260089-1260166	TEX+/-	3'UTR	77	5643.76	-0.1423	yes	id53	30(38%)	NA	NA	NA	NHNTTGAHWWWWWDHDNWWWWTATGKTATAATWWA	135.564	136.103	115.833	5481.92	5406.85	5643.76
77	NC_004668.1	sRNA_062	1268258	1268405	+	TSS:1268258_+	1268258-1268405	TEX+/-	5'UTR	147	3111.49	-0.2236	no	NA	NA	NA	NA	NA	NHNTTGAHWWWWWDHDNWWWWTATGKTATAATWWA	108.345	99.2838	89.5608	3111.49	2483.64	2734.76
92	NC_004668.1	sRNA_063	1294158	1294234	-	TSS:1294234_-	1294158-1294234	TEX+/-	5'UTR	76	2246.39	-0.1221	yes	NA	NA	NA	NA	NA	NHNTTGAHWWWWWDHDNWWWWTATGKTATAATWWA	71.0779	65.8442	61.9481	1741.25	1962.3	2246.39
125	NC_004668.1	sRNA_064	1323281	1323516	+	TSS:1323281_+	1323281-1323516	TEX+/-	5'UTR	235	348.573	-0.2318	no	NA	NA	NA	NA	terminator:1323476-1323502_+	NHNTTGAHWWWWWDHDNWWWWTATGKTATAATWWA	230.432	293.053	348.573	271.454	258.256	310.434
135	NC_004668.1	sRNA_065	1343522	1343619	-	TSS:1343619_-	1343522-1343619	TEX+/-	5'UTR	97	142.98	-0.101	yes	NA	NA	NA	NA	NA	NHNTTGAHWWWWWDHDNWWWWTATGKTATAATWWA	63.0714	75.9898	78.4286	129.327	127.939	142.98
15	NC_004668.1	sRNA_066	1345555	1345674	+	TSS:1345555_+	1345555-1345674	TEX+/-	Antisense	119	35487.1	-0.2367	no	NA	NA	NA	NA	NA	NHNTTGAHWWWWWDHDNWWWWTATGKTATAATWWA	219.781	262.573	135.24	35487.1	20541.1	15701.5
64	NC_004668.1	sRNA_067	1392104	1392272	+	TSS:1392104_+	1392104-1392272	TEX+/-	5'UTR	168	4175.88	-0.2663	no	NA	NA	NA	NA	NA	NHNTTGAHWWWWWDHDNWWWWTATGKTATAATWWA	124.156	162.095	144.19	3214.37	3740.48	4175.88
31	NC_004668.1	sRNA_068	1417952	1418067	-	TSS:1418067_-	1417952-1418067	TEX+/-	Antisense	115	18464	-0.3802	no	id57;NP_815173.1	116(100%);7(6%)	NA	NA	NA	NHNTTGAHWWWWWDHDNWWWWTATGKTATAATWWA	348.481	435.877	377.802	16407.3	18464	15809.1
25	NC_004668.1	sRNA_069	1447292	1447386	+	TSS:1447292_+;TSS:1447297_+	1447292-1447386;1447297-1447386	TEX+/-	5'UTR	94	23138	-0.2716	yes	NA	NA	NA	NA	NA	NHNTTGAHWWWWWDHDNWWWWTATGKTATAATWWA	863.442	1047.42	790.221	23138	21109.1	20917.7
19	NC_004668.1	sRNA_070	1469506	1469637	+	TSS:1469506_+	1469506-1469637	TEX+/-	5'UTR	131	28359.1	-0.2758	yes	NA	NA	NA	NA	NA	NHNTTGAHWWWWWDHDNWWWWTATGKTATAATWWA	350.371	518.992	401.523	21089.5	24149.8	28359.1
26	NC_004668.1	sRNA_071	1495293	1495394	+	TSS:1495293_+	1495293-1495394	TEX+/-	5'UTR	101	23128.4	-0.1853	no	NA	NA	NA	NA	NA	NHNTTGAHWWWWWDHDNWWWWTATGKTATAATWWA	1908.22	2065.92	2338.94	18418.6	19010.2	23128.4
47	NC_004668.1	sRNA_072	1553127	1553262	+	TSS:1553127_+	1553127-1553262	TEX+/-	Antisense	135	9831.3	-0.2956	no	NA	NA	NA	NA	NA	NHNTTGAHWWWWWDHDNWWWWTATGKTATAATWWA	325.082	404.284	342.806	9822.54	9831.3	9016.31
119	NC_004668.1	sRNA_073	1563335	1563477	-	TSS:1563477_-	1563335-1563477	TEX+/-	Intergenic	142	454.125	-0.2608	yes	NA	NA	NA	NA	NA	NHNTTGAHWWWWWDHDNWWWWTATGKTATAATWWA	84.4516	98.6048	84.6694	454.125	365.558	366.766
52	NC_004668.1	sRNA_074	1589501	1589596	-	TSS:1589596_-	1589501-1589596	TEX+/-	5'UTR	95	7328.81	-0.2979	yes	NA	NA	NA	NA	terminator:1589511-1589557_-	NHNTTGAHWWWWWDHDNWWWWTATGKTATAATWWA	57.7792	97.2338	57.4026	7328.81	6505.43	5700.64
122	NC_004668.1	sRNA_075	1590781	1591213	-	TSS:1590874_-;TSS:1591035_-;TSS:1591213_-	1590781-1591213;1590874-1591213;1591035-1591213	TEX+/-	Intergenic	432	382.101	-0.306	yes	NA	NA	NA	NA	terminator:1590796-1590835_-	NHNTTGAHWWWWWDHDNWWWWTATGKTATAATWWA	71.6715	85.1377	79.1812	382.101	363.094	365.391
131	NC_004668.1	sRNA_076	1592285	1592379	-	TSS:1592379_-	1592285-1592379	TEX+/-	5'UTR	94	180.227	-0.3642	yes	NA	NA	NA	NA	terminator:1592293-1592335_-	NHNTTGAHWWWWWDHDNWWWWTATGKTATAATWWA	47.1467	72.2933	73.2933	180.227	154.8	167.813
101	NC_004668.1	sRNA_077	1595387	1595546	-	TSS:1595546_-	1595387-1595546	TEX+/-	5'UTR	159	1539.49	-0.1969	yes	NA	NA	NA	NA	NA	NHNTTGAHWWWWWDHDNWWWWTATGKTATAATWWA	45.9296	35.6972	33.2535	1539.49	1128.41	1242.34
61	NC_004668.1	sRNA_078	1660581	1660623	-	TSS:1660623_-	1660581-1660623	TEX+/-	5'UTR	42	5159.14	-0.0744	yes	NA	NA	NA	NA	NA	NHNTTGAHWWWWWDHDNWWWWTATGKTATAATWWA	223.07	253.256	250.767	3927.72	3816.05	5159.14
83	NC_004668.1	sRNA_079	1767646	1767744	-	TSS:1767744_-	1767646-1767744	TEX+/-	5'UTR	98	2474.25	-0.1444	yes	NA	NA	NA	NA	NA	NHNTTGAHWWWWWDHDNWWWWTATGKTATAATWWA	38	46.6883	49.7792	1823.94	1963.61	2474.25
74	NC_004668.1	sRNA_080	1810983	1811162	-	TSS:1811162_-	1810983-1811162	TEX+/-	5'UTR	179	3259.69	-0.2739	yes	NA	NA	NA	NA	terminator:1810983-1811004_-	NHNTTGAHWWWWWDHDNWWWWTATGKTATAATWWA	61.1167	62.5444	55.9778	3259.69	2964.48	2570.45
1	NC_004668.1	sRNA_081	1876579	1876694	-	TSS:1876681_-;TSS:1876694_-	1876579-1876694	TEX+/-	Antisense	115	1.20943e+06	-0.1862	no	NP_815615.1	67(58%)	NA	NA	terminator:1876534-1876573_-	NHNTTGAHWWWWWDHDNWWWWTATGKTATAATWWA	4858.31	9810.81	4448.9	1.17103e+06	1.20943e+06	1.14208e+06
71	NC_004668.1	sRNA_082	1894994	1895165	+	TSS:1894994_+	1894994-1895165	TEX+/-	Antisense	171	3454.99	-0.2924	no	NA	NA	NP_815634,1	172(100%)	NA	NHNTTGAHWWWWWDHDNWWWWTATGKTATAATWWA	608.186	626.291	594.547	3454.99	2957.48	2927.4
2	NC_004668.1	sRNA_084	1917727	1917936	+	TSS:1917727_+;TSS:1917733_+	1917727-1917936;1917733-1917936	TEX+/-	5'UTR	209	465810	-0.3171	no	NP_815656.1	2(1%)	NA	NA	NA	NHNTTGAHWWWWWDHDNWWWWTATGKTATAATWWA	12930.3	15620.6	11332.6	465810	437925	416766
18	NC_004668.1	sRNA_085	1924555	1924621	-	TSS:1924621_-	1924555-1924621	TEX+/-	5'UTR	66	30307.6	-0.2224	yes	id60	67(100%)	NA	NA	NA	NHNTTGAHWWWWWDHDNWWWWTATGKTATAATWWA	184.761	350.269	194.284	30307.6	29008.4	27513.2
13	NC_004668.1	sRNA_086	1924658	1924736	-	TSS:1924736_-	1924658-1924736	TEX+/-	Intergenic	78	45196.8	-0.1696	no	id60	79(100%)	NA	NA	terminator:1924675-1924698_-	NHNTTGAHWWWWWDHDNWWWWTATGKTATAATWWA	259.861	472.278	266.304	45196.8	44228.3	43606.7
8	NC_004668.1	sRNA_087	1926320	1926408	-	TSS:1926408_-	1926320-1926408	TEX+/-	Intergenic	88	76633.3	-0.309	no	id60	89(100%)	NA	NA	terminator:1926333-1926368_-	NHNTTGAHWWWWWDHDNWWWWTATGKTATAATWWA	244.017	529.263	252.019	76633.3	71204.4	61153.9
66	NC_004668.1	sRNA_089	1977652	1977745	-	TSS:1977745_-	1977652-1977745	TEX+/-	Antisense	93	4116.13	-0.2553	yes	NP_815720.1	94(100%)	NA	NA	NA	NHNTTGAHWWWWWDHDNWWWWTATGKTATAATWWA	111.333	121.653	130.213	2759.59	3530.33	4116.13
133	NC_004668.1	sRNA_090	2003572	2003659	-	TSS:2003659_-	2003572-2003659	TEX+/-	5'UTR	87	155.034	-0.1716	no	NA	NA	NA	NA	NA	NHNTTGAHWWWWWDHDNWWWWTATGKTATAATWWA	26.5682	43.3636	39.9432	87.7841	102.852	155.034
63	NC_004668.1	sRNA_091	2004134	2004432	-	TSS:2004432_-	2004134-2004432	TEX+/-	5'UTR	298	4438.81	-0.2853	yes	NA	NA	NA	NA	NA	NHNTTGAHWWWWWDHDNWWWWTATGKTATAATWWA	147.522	201.92	195.783	2951.84	3690.62	4438.81
4	NC_004668.1	sRNA_092	2006692	2006789	-	TSS:2006789_-	2006692-2006789	TEX+/-	Intergenic	97	287194	-0.2316	no	id64	98(100%)	NA	NA	NA	NHNTTGAHWWWWWDHDNWWWWTATGKTATAATWWA	1104.96	2147.17	1003.25	287194	244400	221223
93	NC_004668.1	sRNA_093	2104275	2104360	+	TSS:2104275_+	2104275-2104360	TEX+/-	Antisense	85	2222	-0.3628	yes	NA	NA	NP_815849,1	7(8%)	NA	NHNTTGAHWWWWWDHDNWWWWTATGKTATAATWWA	48.9329	70.3162	47.7854	2222	2165.6	1669.17
50	NC_004668.1	sRNA_094	2119288	2119382	-	TSS:2119382_-	2119288-2119382	TEX+/-	Intergenic	94	9132.92	-0.3432	no	NA	NA	NA	NA	terminator:2119259-2119279_-	NHNTTGAHWWWWWDHDNWWWWTATGKTATAATWWA	1202.38	1371.04	1237.24	9132.92	6839.04	7012.46
113	NC_004668.1	sRNA_095	2177091	2177193	+	TSS:2177091_+	2177091-2177193	TEX+/-	Intergenic	102	692.728	-0.1748	no	NA	NA	NA	NA	NA	NHNTTGAHWWWWWDHDNWWWWTATGKTATAATWWA	89.534	84.6408	57.165	692.728	607.388	497.466
11	NC_004668.1	sRNA_096	2178627	2178745	+	TSS:2178627_+	2178627-2178745	TEX+/-	Intergenic	118	51063.6	-0.1471	no	NA	NA	NA	NA	NA	NHNTTGAHWWWWWDHDNWWWWTATGKTATAATWWA	744.591	1005.63	851.4	42082.6	51063.6	49814.4
82	NC_004668.1	sRNA_097	2219117	2219217	-	TSS:2219217_-	2219117-2219217	TEX+/-	5'UTR	100	2685.19	-0.1941	yes	NA	NA	NA	NA	NA	NHNTTGAHWWWWWDHDNWWWWTATGKTATAATWWA	105.104	103.857	122.714	1767.26	2148.43	2685.19
139	NC_004668.1	sRNA_098	2281986	2282248	+	TSS:2281986_+;TSS:2282174_+	2281986-2282248;2282174-2282248	TEX+/-	Intergenic	262	119.654	-0.219	yes	NA	NA	NA	NA	NA	NHNTTGAHWWWWWDHDNWWWWTATGKTATAATWWA	2.87833	4.58555	3.41825	93.2053	105.11	119.654
69	NC_004668.1	sRNA_099	2288316	2288416	-	TSS:2288416_-	2288316-2288416	TEX+/-	5'UTR	100	3795.55	-0.2624	yes	NA	NA	NA	NA	NA	NHNTTGAHWWWWWDHDNWWWWTATGKTATAATWWA	147.766	87.6364	137.506	3795.55	1689.9	2947.03
148	NC_004668.1	sRNA_100	2290813	2290886	-	TSS:2290886_-	2290813-2290886	TEX+/-	5'UTR	73	51.5405	-0.0514	yes	NA	NA	NA	NA	NA	NHNTTGAHWWWWWDHDNWWWWTATGKTATAATWWA	46.1892	44.1216	51.3108	51.5405	50.473	50.0541
120	NC_004668.1	sRNA_101	2305683	2305768	-	TSS:2305768_-	2305683-2305768	TEX+/-	5'UTR	85	436.373	-0.257	yes	NA	NA	NP_816029,1	2(2%)	NA	NHNTTGAHWWWWWDHDNWWWWTATGKTATAATWWA	43.36	35.9733	45.36	412.867	436.373	391.2
37	NC_004668.1	sRNA_102	2384441	2384528	-	TSS:2384521_-;TSS:2384528_-	2384441-2384528	TEX+/-	5'UTR	87	14969.2	-0.1818	yes	NA	NA	NA	NA	terminator:2384421-2384456_-	NA	138.511	207.057	148.534	14969.2	13642.5	13428.7
99	NC_004668.1	sRNA_103	2405737	2405996	+	TSS:2405737_+;TSS:2405869_+	2405737-2405996;2405869-2405996	TEX+/-	Antisense	259	1726.17	-0.3058	no	NA	NA	NA	NA	NA	NHNTTGAHWWWWWDHDNWWWWTATGKTATAATWWA	39.5185	61.8107	41.9095	1610.52	1726.17	1386.56
112	NC_004668.1	sRNA_104	2406008	2406209	+	TSS:2406008_+	2406008-2406209	TEX+/-	Antisense	201	903.3	-0.1698	yes	NA	NA	NA	NA	terminator:2406226-2406269_+	NHNTTGAHWWWWWDHDNWWWWTATGKTATAATWWA	62.5099	74.0644	82.7116	737.545	688.881	903.3
124	NC_004668.1	sRNA_105	2418755	2418832	-	TSS:2418832_-	2418755-2418832	TEX+/-	5'UTR	77	359.962	-0.1256	no	NA	NA	NA	NA	NA	NHNTTGAHWWWWWDHDNWWWWTATGKTATAATWWA	76.2179	57.3974	66.1282	359.962	341.538	280.859
144	NC_004668.1	sRNA_106	2459441	2459536	-	TSS:2459536_-	2459441-2459536	TEX+/-	Intergenic	95	94.4583	-0.2094	no	NA	NA	NA	NA	NA	NHNTTGAHWWWWWDHDNWWWWTATGKTATAATWWA	47.6146	47.4688	36.0938	93.1979	94.4583	67.7812
35	NC_004668.1	sRNA_107	2459664	2459754	+	TSS:2459664_+	2459664-2459754	TEX+/-	Antisense	90	17221.9	-0.2055	yes	NA	NA	NA	NA	NA	NHNTTGAHWWWWWDHDNWWWWTATGKTATAATWWA	155.187	328.693	199.52	14850	17221.9	15562.7
87	NC_004668.1	sRNA_108	2543927	2544012	-	TSS:2544012_-	2543927-2544012	TEX+/-	Antisense	85	2252.54	-0.3628	yes	NP_816271.1	7(8%)	NA	NA	NA	NHNTTGAHWWWWWDHDNWWWWTATGKTATAATWWA	49.6924	71.2867	47.6426	2252.54	2198.39	1693.41
48	NC_004668.1	sRNA_109	2555056	2555153	-	TSS:2555153_-	2555056-2555153	TEX+/-	Antisense	97	9826.46	-0.1888	yes	NA	NA	NA	NA	terminator:2555009-2555051_-	NHNTTGAHWWWWWDHDNWWWWTATGKTATAATWWA	82.25	96.8421	64.9079	9826.46	6227.28	7976.43
141	NC_004668.1	sRNA_110	2558201	2558275	-	TSS:2558275_-	2558201-2558275	TEX+/-	5'UTR	74	110.96	-0.188	yes	NA	NA	NA	NA	terminator:2558188-2558234_-	NHNTTGAHWWWWWDHDNWWWWTATGKTATAATWWA	39.5467	56.1467	48.4	95.1467	95.24	110.96
40	NC_004668.1	sRNA_111	2578129	2578249	-	TSS:2578249_-	2578129-2578249	TEX+/-	Intergenic	120	14094.1	-0.3116	yes	NA	NA	NA	NA	terminator:2578093-2578118_-	NHNTTGAHWWWWWDHDNWWWWTATGKTATAATWWA	486.182	465.281	313.43	14094.1	8580.24	6742.84
24	NC_004668.1	sRNA_112	2611859	2611962	+	TSS:2611859_+	2611859-2611962	TEX+/-	Intergenic	103	24266.7	-0.151	yes	NA	NA	NA	NA	NA	NHNTTGAHWWWWWDHDNWWWWTATGKTATAATWWA	318.962	444.43	332.722	21898.7	22186.9	24266.7
45	NC_004668.1	sRNA_113	2632715	2632870	-	TSS:2632870_-	2632715-2632870	TEX+/-	5'UTR	155	10401.1	-0.3628	yes	NA	NA	NA	NA	NA	NHNTTGAHWWWWWDHDNWWWWTATGKTATAATWWA	759.929	896.282	849.971	9069.72	9331.63	10401.1
16	NC_004668.1	sRNA_114	2676152	2676358	-	TSS:2676358_-	2676152-2676358	TEX+/-	5'UTR	206	31935.5	-0.2918	no	NA	NA	NP_816398,1	2(1%)	NA	NHNTTGAHWWWWWDHDNWWWWTATGKTATAATWWA	581.139	782.521	725.716	25714.3	28631	31935.5
38	NC_004668.1	sRNA_115	2677360	2677444	+	TSS:2677360_+	2677360-2677444	TEX+/-	5'UTR	84	14730.9	-0.3647	yes	NA	NA	NA	NA	terminator:2677397-2677444_+	NHNTTGAHWWWWWDHDNWWWWTATGKTATAATWWA	175.079	259.776	230.974	13491.8	13283.6	14730.9
137	NC_004668.1	sRNA_116	2680136	2680225	+	TSS:2680136_+	2680136-2680225	TEX+/-	5'UTR	89	132.178	-0.1578	yes	NP_816401.1	2(2%)	NA	NA	NA	NHNTTGAHWWWWWDHDNWWWWTATGKTATAATWWA	55.6849	67.0959	47.6849	132.178	126.973	130.37
36	NC_004668.1	sRNA_117	2683509	2683658	-	TSS:2683658_-	2683509-2683658	TEX+/-	5'UTR	149	15008.9	-0.2507	no	NA	NA	NA	NA	NA	NHNTTGAHWWWWWDHDNWWWWTATGKTATAATWWA	207.746	295.317	333.268	8702.15	10165	15008.9
21	NC_004668.1	sRNA_118	2741588	2741762	-	TSS:2741757_-;TSS:2741762_-	2741588-2741762	TEX+/-	5'UTR	174	25991.2	-0.216	yes	NA	NA	NA	NA	terminator:2741532-2741559_-	NHNTTGAHWWWWWDHDNWWWWTATGKTATAATWWA	420.543	588.457	616.654	12467.3	20672.4	25991.2
34	NC_004668.1	sRNA_119	2746516	2746605	-	TSS:2746605_-	2746516-2746605	TEX+/-	Antisense	89	17246.6	-0.2044	yes	NA	NA	NA	NA	terminator:2746529-2746551_-	NHNTTGAHWWWWWDHDNWWWWTATGKTATAATWWA	201.222	301.704	240.901	13789.7	15187	17246.6
46	NC_004668.1	sRNA_120	2773438	2773664	-	TSS:2773569_-;TSS:2773664_-	2773438-2773664;2773569-2773664	TEX+/-	5'UTR	226	9956.09	-0.1881	yes	NA	NA	NA	NA	NA	NHNTTGAHWWWWWDHDNWWWWTATGKTATAATWWA	7806.04	7488.35	9956.09	6423.1	4940.28	5993.22
41	NC_004668.1	sRNA_121	2821029	2821111	-	TSS:2821111_-	2821029-2821111	TEX+/-	5'UTR	82	13315.5	-0.147	yes	id76	83(100%)	NA	NA	terminator:2821008-2821023_-	NHNTTGAHWWWWWDHDNWWWWTATGKTATAATWWA	107.301	146.337	141.084	8273.28	11772.6	13315.5
107	NC_004668.1	sRNA_122	2884038	2884115	-	TSS:2884115_-	2884038-2884115	TEX+/-	Antisense	77	1163.31	-0.1808	yes	NP_816624.1	78(100%)	NA	NA	NA	NHNTTGAHWWWWWDHDNWWWWTATGKTATAATWWA	53.9487	62.5128	47.5513	1163.31	1009.73	1051.63
86	NC_004668.1	sRNA_124	2957012	2957237	-	TSS:2957237_-	2957012-2957237	TEX+/-	5'UTR	225	2271.1	-0.2248	yes	NA	NA	NA	NA	NA	NHNTTGAHWWWWWDHDNWWWWTATGKTATAATWWA	263.71	271.106	272.918	2271.1	2139.93	2188.91
142	NC_004668.1	sRNA_126	2966059	2966146	+	TSS:2966059_+	2966059-2966146	TEX+/-	5'UTR	87	103.413	-0.2511	yes	NA	NA	NA	NA	NA	NHNTTGAHWWWWWDHDNWWWWTATGKTATAATWWA	40.2667	56.7467	51.52	103.413	74.1867	76.96
140	NC_004668.1	sRNA_127	3031733	3031847	+	TSS:3031733_+	3031733-3031847	TEX+/-	Intergenic	114	118.945	-0.2583	yes	NA	NA	NA	NA	NA	NHNTTGAHWWWWWDHDNWWWWTATGKTATAATWWA	87.3684	81.7895	73.4026	116.253	118.945	109.316
108	NC_004668.1	sRNA_128	3031913	3032112	+	TSS:3031913_+	3031913-3032112	TEX+/-	Intergenic	199	1137.37	-0.2275	yes	NA	NA	NA	NA	terminator:3032077-3032107_+	NHNTTGAHWWWWWDHDNWWWWTATGKTATAATWWA	170.094	204.712	181.215	1137.37	1062.28	1106.06
79	NC_004668.1	sRNA_131	3072865	3072959	-	TSS:3072959_-	3072865-3072959	TEX+/-	5'UTR	94	2962.05	-0.1095	yes	NA	NA	NA	NA	NA	NHNTTGAHWWWWWDHDNWWWWTATGKTATAATWWA	68.6184	61.4211	73	2324.25	1987.16	2962.05
91	NC_004668.1	sRNA_132	3084258	3084343	-	TSS:3084343_-	3084258-3084343	TEX+/-	Antisense	85	2252.32	-0.3628	yes	NP_816816.1;NP_816817.1	2(2%);7(8%)	NA	NA	NA	NHNTTGAHWWWWWDHDNWWWWTATGKTATAATWWA	49.4772	71.2867	47.6426	2252.32	2198.39	1693.43
98	NC_004668.1	sRNA_133	3096339	3096415	-	TSS:3096415_-	3096339-3096415	TEX+/-	5'UTR	76	1841.61	-0.0714	yes	NA	NA	NA	NA	NA	NHNTTGAHWWWWWDHDNWWWWTATGKTATAATWWA	109.87	81.6753	97.2468	1841.61	1636.79	1789.61
146	NC_004668.1	sRNA_135	3118498	3118673	-	TSS:3118673_-	3118498-3118673	TEX+/-	Antisense	175	81.25	-0.2778	no	NA	NA	NA	NA	NA	NHNTTGAHWWWWWDHDNWWWWTATGKTATAATWWA	64.375	74.304	60.5298	81.25	72.3672	72.7443
127	NC_004668.1	sRNA_138	3123386	3123735	-	TSS:3123735_-	3123386-3123735	TEX+/-	Antisense	349	288.539	-0.204	no	NP_816846.1	144(41%)	NA	NA	NA	NHNTTGAHWWWWWDHDNWWWWTATGKTATAATWWA	226.741	268.854	239.045	280.789	234.634	288.539
103	NC_004668.1	sRNA_139	3140274	3140408	+	TSS:3140274_+	3140274-3140408	TEX+/-	3'UTR	134	1492.63	-0.2941	no	NA	NA	id77	30(22%)	terminator:3140340-3140399_+	NHNTTGAHWWWWWDHDNWWWWTATGKTATAATWWA	58.8202	58.2895	65.0307	1185.37	1492.63	1239.23
145	NC_004668.1	sRNA_140	3201569	3201675	-	TSS:3201675_-	3201569-3201675	TEX+/-	Intergenic	106	81.2772	-0.2804	no	NA	NA	NA	NA	terminator:3201526-3201573_-	NHNTTGAHWWWWWDHDNWWWWTATGKTATAATWWA	71.0693	81.2772	62.2871	51.2079	46.9109	41.0099
97	NC_004669.1	sRNA_141	9278	9557	+	TSS:9278_+	9278-9557	TEX+/-	Intergenic	279	1952.7	-0.2368	yes	NP_813820.1;NP_817030.1;NP_817009.1	208(74%);280(100%);10(4%)	NA	NA	terminator:9516-9556_+	NHNTTGAHWWWWWDHDNWWWWTATGKTATAATWWA	1606.8	1606.4	1673.29	1952.7	1488.31	1713.54
53	NC_004669.1	sRNA_142	10772	10905	+	TSS:10772_+	10772-10905	TEX+/-	Antisense	133	7160.81	-0.1821	yes	NP_813823.1;NP_817031.1;NP_817012.1	134(100%);134(100%);134(100%)	NP_816942,1	60(45%)	NA	NHNTTGAHWWWWWDHDNWWWWTATGKTATAATWWA	73.5344	112.36	148.419	3556.27	4791.31	7160.81
143	NC_004669.1	sRNA_144	12281	12687	+	TSS:12281_+;TSS:12341_+	12281-12687;12341-12687	TEX+/-	Antisense	406	98.7445	-0.2187	no	NP_813823.1;NP_817031.1;NP_817017.1	407(100%);407(100%);310(76%)	NP_816945,1	73(18%)	NA	NHNTTGAHWWWWWDHDNWWWWTATGKTATAATWWA	63.9656	63.8231	61.3178	90.8084	98.7445	88.7076
9	NC_004669.1	sRNA_145	13432	13773	-	TSS:13773_-	13432-13773	TEX+/-	Antisense	341	66835.1	-0.2082	no	NP_813825.1;NP_816946.1;NP_817031.1;NP_817017.1;NP_817018.1	334(98%);234(68%);342(100%);263(77%);76(22%)	NA	NA	NA	NHNTTGAHWWWWWDHDNWWWWTATGKTATAATWWA	113.458	366.64	1045.24	55761.1	66835.1	57615.4
7	NC_004669.1	sRNA_146	16683	16757	+	TSS:16683_+	16683-16757	TEX+/-	Antisense	74	110006	-0.2	no	NP_813827.1;NP_817035.1;NP_817021.1	75(100%);75(100%);75(100%)	NP_816949,1	11(15%)	terminator:16711-16750_+	NHNTTGAHWWWWWDHDNWWWWTATGKTATAATWWA	1518.66	2590.93	1989.47	95747	107401	110006
121	NC_004669.1	sRNA_147	38693	38777	+	TSS:38693_+	38693-38777	TEX+/-	Antisense	84	417.997	-0.1482	no	NP_817063.1	85(100%)	NP_813845,1;NP_816972,1	80(94%);85(100%)	NA	NHNTTGAHWWWWWDHDNWWWWTATGKTATAATWWA	48.2576	48.1245	45.3636	417.997	247.019	260.488
22	NC_004669.1	sRNA_148	39210	39291	+	TSS:39210_+;TSS:39214_+	39210-39291;39214-39291	TEX+/-	Antisense	81	24776.5	-0.1207	no	NP_813846.1;NP_817063.1	82(100%);23(28%)	NA	NA	NA	NHNTTGAHWWWWWDHDNWWWWTATGKTATAATWWA	258.275	460.775	331.863	22396	24776.5	24776.5
106	NC_004669.1	sRNA_149	44525	44681	+	TSS:44525_+	44525-44681	TEX+/-	Antisense	156	1224.36	-0.2064	yes	NP_813851.1;NP_817068.1	157(100%);157(100%)	NP_816979,1	60(38%)	NA	NHNTTGAHWWWWWDHDNWWWWTATGKTATAATWWA	64.8032	58.6051	66.296	1165.9	977.995	1224.36
56	NC_004669.1	sRNA_150	45619	45764	-	TSS:45764_-	45619-45764	TEX+/-	Antisense	145	6119.19	-0.1685	no	NP_813852.1;NP_817069.1	146(100%);146(100%)	NA	NA	NA	NHNTTGAHWWWWWDHDNWWWWTATGKTATAATWWA	284.788	247.938	257.87	6119.19	4195.6	4145.51
88	NC_004669.1	sRNA_151	47430	47525	-	TSS:47525_-	47430-47525	TEX+/-	Antisense	95	2252.54	-0.1521	yes	NP_813853.1;NP_816982.1	4(4%);7(7%)	NP_817070,1	96(100%)	NA	NHNTTGAHWWWWWDHDNWWWWTATGKTATAATWWA	49.4899	71.4259	47.6426	2252.54	2198.39	1693.41
5	NC_004669.1	sRNA_152	63242	63459	+	TSS:63242_+	63242-63459	TEX+/-	Intergenic	217	229472	-0.1927	no	NP_813870.1	218(100%)	NA	NA	terminator:63423-63447_+	NHNTTGAHWWWWWDHDNWWWWTATGKTATAATWWA	3483.24	4005.52	2739.92	229472	164005	62311.5
51	NC_004669.1	sRNA_153	63410	63483	-	TSS:63483_-	63410-63483	TEX+/-	Intergenic	73	8330.07	-0.2797	no	NP_813870.1	74(100%)	NA	NA	NA	NHNTTGAHWWWWWDHDNWWWWTATGKTATAATWWA	398.257	456.041	384.865	8330.07	7535.24	7589.85
94	NC_004670.1	sRNA_154	4691	4769	+	TSS:4691_+	4691-4769	TEX+/-	Antisense	78	2222	-0.2886	yes	NP_813818.1	79(100%)	NP_816935,1;NP_817025,1;NP_817006,1	79(100%);79(100%);7(9%)	NA	NHNTTGAHWWWWWDHDNWWWWTATGKTATAATWWA	48.9329	70.3162	47.4816	2222	2165.6	1669.17
42	NC_004671.1	sRNA_155	5279	5473	-	TSS:5473_-	5279-5473	TEX+/-	Antisense	194	11345.5	-0.1636	no	NP_813818.1;NP_816937.1;NP_817026.1;NP_817007.1	195(100%);35(18%);54(28%);195(100%)	NA	NA	NA	NHNTTGAHWWWWWDHDNWWWWTATGKTATAATWWA	473.521	516.794	501.109	11345.5	8718.91	7050.83
73	NC_004671.1	sRNA_156	32657	32778	-	TSS:32778_-	32657-32778	TEX+/-	Antisense	121	3339.21	-0.0869	yes	NP_813841.1;NP_817051.1	122(100%);22(18%)	NP_816967,1	122(100%)	NA	NHNTTGAHWWWWWDHDNWWWWTATGKTATAATWWA	80.5533	104.303	154.238	3339.21	3277.68	2315.45
6	NC_004671.1	sRNA_157	35159	35243	+	TSS:35159_+	35159-35243	TEX+/-	Antisense	84	120227	-0.2212	no	NA	NA	NP_813842,1;NP_816972,1;NP_817054,1	85(100%);85(100%);41(48%)	NA	NHNTTGAHWWWWWDHDNWWWWTATGKTATAATWWA	480.613	1103.87	533.567	120227	119314	118039
117	NC_004671.1	sRNA_158	41392	41520	+	TSS:41392_+	41392-41520	TEX+/-	Intergenic	128	569.472	-0.1372	no	NA	NA	NP_813848,1;NP_816976,1	129(100%);129(100%)	terminator:41484-41538_+	NHNTTGAHWWWWWDHDNWWWWTATGKTATAATWWA	32.5648	34.963	35.0833	569.472	484.31	418.972
39	NC_004671.1	sRNA_159	55427	55662	+	TSS:55427_+;TSS:55455_+	55427-55662;55455-55662	TEX+/-	Intergenic	235	14591.4	-0.1458	no	NA	NA	NP_813864,1;NP_816989,1	9(4%);236(100%)	terminator:55625-55654_+	NHNTTGAHWWWWWDHDNWWWWTATGKTATAATWWA	341.136	458.66	596.8	10004.1	11032.6	14591.4
54	NC_004671.1	sRNA_160	55613	55687	-	TSS:55687_-	55613-55687	TEX+/-	Intergenic	74	6538.71	-0.0587	no	NA	NA	NP_816989,1	75(100%)	NA	NHNTTGAHWWWWWDHDNWWWWTATGKTATAATWWA	57.3867	92.9867	64.7867	5289.3	6538.71	5803.97

## Sheet: E. faecium AUS0004
Table S7. Predicted sRNAs - E. faecium AUS0004
This table lists all sRNAs predicted by ANNOgesic from TSS in E. faecium AUS0004 (chromosome and plasmids)
Associated promoters were identified using MEME
Rank	Genome	Name	Start	End	Strand	Start_with_TSS	Candidates	Lib_type	sRNA type (manual)	sRNA_length	Best_avg_coverage	Normalized_secondary_energy_change(by_length)	new in this study	Overlap_CDS_forward	Overlap_nts_forward	Overlap_CDS_reverse	Overlap_nts_reverse	End_with_terminator	Associated_promoter	Avg_coverage:ID-005244-0054_1_-TEX_forward/ID-005244-0054_1_-TEX_reverse	Avg_coverage:ID-005245-0054_2_-TEX_forward/ID-005245-0054_2_-TEX_reverse	Avg_coverage:ID-005246-0054_3_-TEX_forward/ID-005246-0054_3_-TEX_reverse	Avg_coverage:ID-005278-0054_1_+TEX_forward/ID-005278-0054_1_+TEX_reverse	Avg_coverage:ID-005279-0054_2_+TEX_forward/ID-005279-0054_2_+TEX_reverse	Avg_coverage:ID-005280-0054_3_+TEX_forward/ID-005280-0054_3_+TEX_reverse
21	NC_017022.1	sRNA_000	21593	21667	+	TSS:21593_+	21593-21667	TEX+/-	Antisense	74	14977.9	-0.2547	yes	WP_002302858.1	75(100%)	NA	NA	terminator:21641-21664_+	TTKMATWWTHWDHWWWWHTDTGNTAWAAT	138.391	170.978	284.667	13209.1	10405.8	14977.9
123	NC_017022.1	sRNA_001	29766	29846	+	TSS:29766_+	29766-29846	TEX+/-	Intergenic	80	121.136	-0.1778	no	WP_014401500.1	81(100%)	NA	NA	NA	TTKMATWWTHWDHWWWWHTDTGNTAWAAT	26.1975	33.716	65.4691	48.7407	85.5679	121.136
34	NC_017022.1	sRNA_002	65145	65284	+	TSS:65145_+	65145-65284	TEX+/-	5'UTR	139	9426.54	-0.2764	yes	NA	NA	NA	NA	NA	TTKMATWWTHWDHWWWWHTDTGNTAWAAT	501.65	553.654	722.221	8891.89	6752.12	9426.54
79	NC_017022.1	sRNA_003	154972	155053	+	TSS:154972_+	154972-155053	TEX+/-	Antisense	81	1381.83	-0.3524	yes	NA	NA	EFAU004_RS00785;cds162	7(9%);7(9%)	terminator:155028-155053_+	TTKMATWWTHWDHWWWWHTDTGNTAWAAT	22.8182	27.8191	36.9382	1381.83	1047.7	1325.94
127	NC_017022.1	sRNA_004	159917	160007	+	TSS:159917_+	159917-160007	TEX+/-	Intergenic	90	55.2703	-0.167	yes	NA	NA	NA	NA	NA	TTKMATWWTHWDHWWWWHTDTGNTAWAAT	30.4189	29.9865	34.1892	51.3919	51.6892	55.2703
1	NC_017022.1	sRNA_005	178759	178842	-	TSS:178842_-	178759-178842	TEX+/-	Intergenic	83	899283	-0.225	no	NA	NA	NA	NA	NA	TTKMATWWTHWDHWWWWHTDTGNTAWAAT	3557.58	7638.38	10922.4	418563	558757	899283
4	NC_017022.1	sRNA_006	206309	206509	+	TSS:206309_+	206309-206509	TEX+/-	Intergenic	200	97281.9	-0.394	no	NA	NA	NA	NA	terminator:206471-206500_+	TTKMATWWTHWDHWWWWHTDTGNTAWAAT	522.386	610.411	559.67	97281.9	70895.9	78858
6	NC_017022.1	sRNA_007	213246	213353	+	TSS:213246_+	213246-213353	TEX+/-	5'UTR	107	59450.6	-0.2176	yes	NA	NA	NA	NA	terminator:213327-213347_+	TTKMATWWTHWDHWWWWHTDTGNTAWAAT	1003.97	1014.94	1185.5	59450.6	39598.1	51606.5
67	NC_017022.1	sRNA_008	231404	231676	-	TSS:231676_-	231404-231676	TEX+/-	Intergenic	272	3488.24	-0.1568	no	NA	NA	NA	NA	NA	TTKMATWWTHWDHWWWWHTDTGNTAWAAT	103.081	159.077	210.312	2297.48	2424.24	3488.24
62	NC_017022.1	sRNA_009	286917	286992	-	TSS:286992_-	286917-286992	TEX+/-	Antisense	75	3736.24	-0.2934	yes	WP_002295743.1	18(24%)	NA	NA	NA	TTKMATWWTHWDHWWWWHTDTGNTAWAAT	40.8108	57.224	80	3491.35	2977.84	3736.24
65	NC_017022.1	sRNA_010	292037	292127	+	TSS:292037_+	292037-292127	TEX+/-	Intergenic	90	3681.07	-0.2538	yes	NA	NA	NA	NA	NA	TTKMATWWTHWDHWWWWHTDTGNTAWAAT	36.08	31.2933	51.2267	3358.47	2196.77	3681.07
57	NC_017022.1	sRNA_011	293683	293842	-	TSS:293842_-	293683-293842	TEX+/-	5'UTR	159	4851.17	-0.2069	yes	NA	NA	NA	NA	NA	TTKMATWWTHWDHWWWWHTDTGNTAWAAT	87.3187	120.707	122.706	4788.37	4006.41	4851.17
12	NC_017022.1	sRNA_012	294207	294416	+	TSS:294207_+;TSS:294211_+	294207-294416;294211-294416	TEX+/-	Intergenic	209	27312.3	-0.3081	no	NA	NA	NA	NA	NA	TTKMATWWTHWDHWWWWHTDTGNTAWAAT	459.2	562.619	600.83	27312.3	21540.4	23240.2
43	NC_017022.1	sRNA_013	294335	294429	-	TSS:294429_-	294335-294429	TEX+/-	Intergenic	94	7698.62	-0.3389	yes	NA	NA	NA	NA	NA	TTKMATWWTHWDHWWWWHTDTGNTAWAAT	250.547	297.92	469.013	7496.88	5480.51	7698.62
72	NC_017022.1	sRNA_014	297283	297411	-	TSS:297358_-;TSS:297411_-	297283-297411;297358-297411	TEX+/-	Antisense	128	2191.06	-0.2426	yes	EFAU004_RS01480;cds308	71(55%);71(55%)	NA	NA	NA	TTKMATWWTHWDHWWWWHTDTGNTAWAAT	23.9937	33.8037	46.5061	2047.13	1742.55	2191.06
114	NC_017022.1	sRNA_015	383492	383688	+	TSS:383492_+	383492-383688	TEX+/-	5'UTR	196	376.623	-0.2645	yes	NA	NA	NA	NA	terminator:383641-383676_+	TTKMATWWTHWDHWWWWHTDTGNTAWAAT	301.491	376.623	342.417	207.954	272.726	165.851
29	NC_017022.1	sRNA_016	404386	404569	+	TSS:404386_+	404386-404569	TEX+/-	5'UTR	183	10862.1	-0.2076	yes	NA	NA	NA	NA	NA	TTKMATWWTHWDHWWWWHTDTGNTAWAAT	197.745	206.304	246.228	10862.1	8934.11	10832.6
60	NC_017022.1	sRNA_017	434966	435043	+	TSS:434966_+	434966-435043	TEX+/-	5'UTR	77	3875.19	-0.0872	yes	NA	NA	NA	NA	NA	TTKMATWWTHWDHWWWWHTDTGNTAWAAT	43.6282	51.9615	70.0256	2596.27	3099.9	3875.19
50	NC_017022.1	sRNA_018	504332	504427	-	TSS:504427_-	504332-504427	TEX+/-	5'UTR	95	6494.43	-0.1708	yes	NA	NA	WP_002286847,1	2(2%)	NA	TTKMATWWTHWDHWWWWHTDTGNTAWAAT	88.7957	96.1398	128.914	5867.02	4077.68	6494.43
99	NC_017022.1	sRNA_019	524113	524203	-	TSS:524203_-	524113-524203	TEX+/-	Intergenic	90	673.733	-0.122	no	NA	NA	NA	NA	NA	TTKMATWWTHWDHWWWWHTDTGNTAWAAT	26.9333	32.6267	27.28	585.853	411.48	673.733
120	NC_017022.1	sRNA_021	574298	574386	+	TSS:574298_+	574298-574386	TEX+/-	5'UTR, antisense	88	175.154	-0.2135	yes	NA	NA	NA	NA	NA	TTKMATWWTHWDHWWWWHTDTGNTAWAAT	71.7692	51.5385	72.7051	175.154	144.91	115.885
14	NC_017022.1	sRNA_022	577447	577750	+	TSS:577447_+	577447-577750	TEX+/-	5'UTR	303	23098.1	-0.2924	no	NA	NA	NA	NA	terminator:577704-577740_+	TTKMATWWTHWDHWWWWHTDTGNTAWAAT	520.809	604.053	747.498	21262.6	17344.8	23098.1
23	NC_017022.1	sRNA_023	623356	623430	+	TSS:623356_+	623356-623430	TEX+/-	antisense	74	14977.6	-0.2547	yes	NA	NA	NA	NA	NA	TTKMATWWTHWDHWWWWHTDTGNTAWAAT	138.317	170.868	284.43	13209	10405.6	14977.6
74	NC_017022.1	sRNA_024	634102	634211	-	TSS:634211_-	634102-634211	TEX+/-	Intergenic	109	2029.09	-0.1064	yes	NA	NA	NA	NA	NA	TTKMATWWTHWDHWWWWHTDTGNTAWAAT	69.9182	80.3909	85.4818	1756.65	1449.64	2029.09
97	NC_017022.1	sRNA_025	642740	642945	+	TSS:642740_+	642740-642945	TEX+/-	5'UTR	205	742.868	-0.2505	no	NA	NA	NA	NA	NA	TTKMATWWTHWDHWWWWHTDTGNTAWAAT	81.037	83.3122	82.9841	742.868	529.757	684.069
36	NC_017022.1	sRNA_026	646736	647041	+	TSS:646736_+	646736-647041	TEX+/-	5'UTR	305	9111.45	-0.2588	yes	NA	NA	WP_002293782,1	306(100%)	NA	TTKMATWWTHWDHWWWWHTDTGNTAWAAT	270.941	314.443	470.833	7609.68	7466.45	9111.45
69	NC_017022.1	sRNA_027	659049	659201	+	TSS:659049_+	659049-659201	TEX+/-	5'UTR	152	2505.86	-0.4333	no	NA	NA	NA	NA	terminator:659222-659254_+	TTKMATWWTHWDHWWWWHTDTGNTAWAAT	586.569	748.542	753.712	2414.75	2505.86	2105.48
115	NC_017022.1	sRNA_028	670030	670129	-	TSS:670129_-	670030-670129	TEX+/-	5'UTR	99	740.159	-0.392	yes	NA	NA	NA	NA	NA	TTKMATWWTHWDHWWWWHTDTGNTAWAAT	204.977	257.511	208.125	664.807	740.159	582.216
30	NC_017022.1	sRNA_029	675372	675478	+	TSS:675372_+	675372-675478	TEX+/-	Intergenic	106	10759.1	-0.1794	yes	NA	NA	NA	NA	NA	TTKMATWWTHWDHWWWWHTDTGNTAWAAT	58.284	68.2469	98.5556	10759.1	6443.47	8884.77
22	NC_017022.1	sRNA_030	688060	688134	+	TSS:688060_+	688060-688134	TEX+/-	Antisense	74	14977.9	-0.2547	yes	NA	NA	NA	NA	NA	TTKMATWWTHWDHWWWWHTDTGNTAWAAT	138.391	170.978	284.667	13209	10405.8	14977.9
101	NC_017022.1	sRNA_032	823989	824115	-	TSS:824115_-	823989-824115	TEX+/-	Intergenic	126	583.614	-0.1047	yes	NA	NA	NA	NA	NA	TTKMATWWTHWDHWWWWHTDTGNTAWAAT	107.764	142.622	199.268	419.252	583.614	368.268
104	NC_017022.1	sRNA_033	825558	825644	+	TSS:825558_+	825558-825644	TEX+/-	Antisense	86	544.953	-0.3333	yes	NA	NA	NA	NA	NA	TTKMATWWTHWDHWWWWHTDTGNTAWAAT	62.86	64.9933	54.26	541.36	410.287	544.953
85	NC_017022.1	sRNA_034	825660	825747	+	TSS:825660_+	825660-825747	TEX+/-	Antisense	87	1167.47	-0.167	yes	NA	NA	NA	NA	NA	TTKMATWWTHWDHWWWWHTDTGNTAWAAT	31.2733	29.4733	45.7867	1081.3	948.967	1167.47
17	NC_017022.1	sRNA_035	831780	831866	-	TSS:831866_-	831780-831866	TEX+/-	Intergenic	86	18058.5	-0.2264	yes	NA	NA	NA	NA	NA	TTKMATWWTHWDHWWWWHTDTGNTAWAAT	61.6067	59.22	116.091	18058.5	12217.5	16602
38	NC_017022.1	sRNA_036	860318	860518	-	TSS:860402_-;TSS:860518_-	860318-860518;860402-860518	TEX+/-	5'UTR	200	8756.16	-0.2015	yes	NA	NA	NA	NA	terminator:860326-860385_-	TTKMATWWTHWDHWWWWHTDTGNTAWAAT	25.1554	30.5173	45.0505	6749	5445.26	8756.16
32	NC_017022.1	sRNA_037	860519	860629	+	TSS:860519_+	860519-860629	TEX+/-	5'UTR	110	10453.4	-0.2078	yes	NA	NA	NA	NA	NA	TTKMATWWTHWDHWWWWHTDTGNTAWAAT	294.82	343.722	433.489	10265.6	8190.22	10453.4
28	NC_017022.1	sRNA_038	875004	875282	+	TSS:875004_+	875004-875282	TEX+/-	5'UTR	278	11493.9	-0.2756	yes	NA	NA	NA	NA	NA	TTKMATWWTHWDHWWWWHTDTGNTAWAAT	382.76	695.986	912.337	5767.86	8026.18	11493.9
71	NC_017022.1	sRNA_039	877476	877604	-	TSS:877551_-;TSS:877604_-	877476-877604;877551-877604	TEX+/-	Antisense	128	2191.1	-0.2426	yes	EFAU004_RS04290;cds912	71(55%);71(55%)	NA	NA	NA	TTKMATWWTHWDHWWWWHTDTGNTAWAAT	23.9937	33.833	46.5061	2047.21	1742.55	2191.1
112	NC_017022.1	sRNA_040	926272	926352	+	TSS:926272_+	926272-926352	TEX+/-	Antisense	80	383.949	-0.3148	yes	NA	NA	WP_002296623,1	7(9%)	NA	TTKMATWWTHWDHWWWWHTDTGNTAWAAT	79.3208	98.1076	128.842	383.949	281.906	331.199
77	NC_017022.1	sRNA_041	971153	971230	-	TSS:971230_-	971153-971230	TEX+/-	5'UTR	77	1662.93	-0.1038	no	NA	NA	NA	NA	NA	TTKMATWWTHWDHWWWWHTDTGNTAWAAT	51.5921	37.0921	80.0044	1227.88	1089.5	1662.93
26	NC_017022.1	sRNA_042	974247	974320	-	TSS:974320_-	974247-974320	TEX+/-	5'UTR	73	13923.2	-0.0811	yes	NA	NA	NA	NA	terminator:974191-974238_-	TTKMATWWTHWDHWWWWHTDTGNTAWAAT	157.162	134.422	402.297	11549.4	8329.96	13923.2
40	NC_017022.1	sRNA_043	992351	992469	-	TSS:992469_-	992351-992469	TEX+/-	5'UTR	118	8476.38	-0.2235	yes	NA	NA	NA	NA	NA	TTKMATWWTHWDHWWWWHTDTGNTAWAAT	258.084	280.647	336.84	8476.38	6311.14	8340.6
51	NC_017022.1	sRNA_044	1062156	1062431	-	TSS:1062431_-	1062156-1062431	TEX+/-	5'UTR	275	6164.7	-0.254	yes	NA	NA	NA	NA	NA	TTKMATWWTHWDHWWWWHTDTGNTAWAAT	175.754	181.308	217.217	5226.92	3688.62	6164.7
24	NC_017022.1	sRNA_045	1070316	1070396	-	TSS:1070390_-;TSS:1070396_-	1070316-1070396	TEX+/-	Antisense	80	14367.5	-0.2358	yes	EFAU004_RS15255;cds1092	6(7%);6(7%)	NA	NA	terminator:1070319-1070342_-	TTKMATWWTHWDHWWWWHTDTGNTAWAAT	132.987	164.683	273.614	12701	9996.36	14367.5
39	NC_017022.1	sRNA_046	1086985	1087073	-	TSS:1087069_-;TSS:1087073_-	1086985-1087073	TEX+/-	5'UTR	88	8637.75	-0.2056	yes	NA	NA	NA	NA	NA	TTKMATWWTHWDHWWWWHTDTGNTAWAAT	101.949	137.81	133.57	7850.08	5934.52	8637.75
90	NC_017022.1	sRNA_047	1092429	1092635	+	TSS:1092429_+	1092429-1092635	TEX+/-	3'UTR	206	994.162	-0.2058	yes	NA	NA	NA	NA	terminator:1092596-1092614_+	TTKMATWWTHWDHWWWWHTDTGNTAWAAT	70.733	113.77	128.073	759	707.89	994.162
20	NC_017022.1	sRNA_048	1143473	1143543	+	TSS:1143473_+	1143473-1143543	TEX+/-	Intergenic	70	15121.1	-0.269	yes	NA	NA	NA	NA	terminator:1143523-1143543_+	TTKMATWWTHWDHWWWWHTDTGNTAWAAT	136.762	169.907	285.238	13339.2	10514.2	15121.1
128	NC_017022.1	sRNA_049	1154766	1154889	+	TSS:1154766_+	1154766-1154889	TEX+/-	Intergenic	123	48.6863	-0.396	yes	NA	NA	NA	NA	NA	TTKMATWWTHWDHWWWWHTDTGNTAWAAT	27.2255	25.0294	48.6863	30.5686	34.0882	37.549
106	NC_017022.1	sRNA_050	1185276	1185420	-	TSS:1185420_-	1185276-1185420	TEX+/-	Antisense	144	462.993	-0.2083	yes	WP_002322021.1	103(71%)	NA	NA	terminator:1185246-1185256_-	TTKMATWWTHWDHWWWWHTDTGNTAWAAT	22.2598	25.7379	31.9034	419.745	221.483	462.993
118	NC_017022.1	sRNA_051	1245319	1245416	-	TSS:1245416_-	1245319-1245416	TEX+/-	5'UTR	97	237.442	-0.1347	yes	NA	NA	NA	NA	NA	TTKMATWWTHWDHWWWWHTDTGNTAWAAT	68.1299	30.6104	77.7922	237.442	145.182	165.273
31	NC_017022.1	sRNA_052	1278222	1278302	-	TSS:1278302_-	1278222-1278302	TEX+/-	5'UTR	80	10513.4	-0.216	yes	NA	NA	NA	NA	NA	TTKMATWWTHWDHWWWWHTDTGNTAWAAT	93.5195	70.5714	86.6883	10513.4	8028.87	9139.48
80	NC_017022.1	sRNA_053	1298052	1298133	+	TSS:1298052_+	1298052-1298133	TEX+/-	Antisense	81	1381.4	-0.3524	yes	NA	NA	EFAU004_RS06270;cds1317	7(9%);7(9%)	terminator:1298110-1298131_+	TTKMATWWTHWDHWWWWHTDTGNTAWAAT	22.8182	27.8191	36.6168	1381.4	1047.9	1325.62
110	NC_017022.1	sRNA_054	1342753	1342833	-	TSS:1342833_-	1342753-1342833	TEX+/-	Intergenic	80	396.465	-0.3148	yes	NA	NA	NA	NA	NA	TTKMATWWTHWDHWWWWHTDTGNTAWAAT	79.6227	98.9466	130.36	396.465	291.462	342.244
33	NC_017022.1	sRNA_055	1349850	1350089	-	TSS:1350089_-	1349850-1350089	TEX+/-	3'UTR and antisense	239	9579.79	-0.2746	yes	WP_002352380.1	186(78%)	NA	NA	terminator:1349863-1349893_-	TTKMATWWTHWDHWWWWHTDTGNTAWAAT	323.509	319.116	471.384	9198.08	7321.59	9579.79
88	NC_017022.1	sRNA_056	1378457	1378533	+	TSS:1378457_+	1378457-1378533	TEX+/-	5'UTR	76	1020.28	-0.1883	yes	NA	NA	NA	NA	NA	TTKMATWWTHWDHWWWWHTDTGNTAWAAT	139.867	123.4	92.5067	1020.28	754.04	659.96
107	NC_017022.1	sRNA_057	1410798	1410878	-	TSS:1410878_-	1410798-1410878	TEX+/-	Antisense	80	396.497	-0.3148	yes	WP_002296623.1	7(9%)	NA	NA	NA	TTKMATWWTHWDHWWWWHTDTGNTAWAAT	79.6227	98.9466	130.36	396.497	291.462	342.339
111	NC_017022.1	sRNA_058	1453523	1453604	+	TSS:1453523_+	1453523-1453604	TEX+/-	Antisense	81	388.703	-0.311	yes	NA	NA	NA	NA	NA	TTKMATWWTHWDHWWWWHTDTGNTAWAAT	79.1962	98.2014	128.521	388.703	285.042	334.867
37	NC_017022.1	sRNA_059	1458266	1458466	+	TSS:1458266_+;TSS:1458382_+	1458266-1458466;1458382-1458466	TEX+/-	Intergenic	200	8760.04	-0.2015	yes	NA	NA	NA	NA	NA	TTKMATWWTHWDHWWWWHTDTGNTAWAAT	25.1468	30.5579	45.0566	6751.42	5446.45	8760.04
18	NC_017022.1	sRNA_060	1486918	1487004	+	TSS:1486918_+	1486918-1487004	TEX+/-	Intergenic	86	17706.4	-0.2264	yes	NA	NA	NA	NA	NA	TTKMATWWTHWDHWWWWHTDTGNTAWAAT	60.82	58	114.424	17706.4	11985.5	16288
84	NC_017022.1	sRNA_061	1493037	1493124	-	TSS:1493124_-	1493037-1493124	TEX+/-	Antisense	87	1183.26	-0.167	yes	NA	NA	NA	NA	NA	TTKMATWWTHWDHWWWWHTDTGNTAWAAT	31.5933	29.7133	46.2133	1096.03	961.76	1183.26
103	NC_017022.1	sRNA_062	1493140	1493226	-	TSS:1493226_-	1493140-1493226	TEX+/-	Antisense	86	553.293	-0.3333	yes	NA	NA	NA	NA	NA	TTKMATWWTHWDHWWWWHTDTGNTAWAAT	59.3067	64.6733	51.9778	550.662	417.727	553.293
83	NC_017022.1	sRNA_063	1496227	1496414	+	TSS:1496227_+	1496227-1496414	TEX+/-	Intergenic	187	1250.48	-0.1697	yes	NA	NA	NA	NA	terminator:1496422-1496456_+	TTKMATWWTHWDHWWWWHTDTGNTAWAAT	113.42	109.011	103.782	1250.48	1105.13	1099.54
25	NC_017022.1	sRNA_064	1510126	1510206	-	TSS:1510200_-;TSS:1510206_-	1510126-1510206	TEX+/-	Antisense	80	14367.5	-0.2358	yes	WP_002297218.1	6(7%)	NA	NA	NA	TTKMATWWTHWDHWWWWHTDTGNTAWAAT	132.987	164.683	273.614	12701	9996.36	14367.5
122	NC_017022.1	sRNA_065	1512176	1512429	+	TSS:1512176_+;TSS:1512273_+	1512176-1512429;1512273-1512429	TEX+/-	Intergenic	253	121.891	-0.2071	yes	NA	NA	NA	NA	NA	TTKMATWWTHWDHWWWWHTDTGNTAWAAT	22.3264	26.2469	32.3598	103.506	93.2259	121.891
121	NC_017022.1	sRNA_066	1528847	1528937	-	TSS:1528937_-	1528847-1528937	TEX+/-	5'UTR	90	159.052	-0.0978	yes	NA	NA	WP_002296631,1	6(7%)	NA	TTKMATWWTHWDHWWWWHTDTGNTAWAAT	65.8571	88.7013	75.8831	100.584	159.052	86.3636
87	NC_017022.1	sRNA_067	1532396	1532812	+	TSS:1532396_+;TSS:1532590_+	1532396-1532812;1532590-1532812	TEX+/-	Intergenic	416	1135.07	-0.1693	yes	NA	NA	NA	NA	NA	TTKMATWWTHWDHWWWWHTDTGNTAWAAT	67.6829	80.6195	88.6659	994.015	880.844	1135.07
76	NC_017022.1	sRNA_068	1598592	1598744	-	TSS:1598744_-	1598592-1598744	TEX+/-	Antisense	152	1664.12	-0.2549	yes	WP_002320911.1	99(65%)	NA	NA	NA	TTKMATWWTHWDHWWWWHTDTGNTAWAAT	64.5359	68.1961	106.497	1517.28	1214.16	1664.12
9	NC_017022.1	sRNA_069	1613156	1613421	-	TSS:1613421_-	1613156-1613421	TEX+/-	Intergenic	265	45248.8	-0.2823	no	NA	NA	NA	NA	terminator:1613165-1613201_-	TTKMATWWTHWDHWWWWHTDTGNTAWAAT	719.26	772.062	969.713	38165.6	27183.6	45248.8
98	NC_017022.1	sRNA_070	1681646	1681797	+	TSS:1681646_+	1681646-1681797	TEX+/-	Intergenic	151	730.329	-0.1329	yes	NA	NA	NA	NA	NA	TTKMATWWTHWDHWWWWHTDTGNTAWAAT	215.832	303.145	563.651	426.257	645.243	730.329
117	NC_017022.1	sRNA_071	1726325	1726418	+	TSS:1726325_+	1726325-1726418	TEX+/-	5'UTR	93	303.667	-0.1245	yes	NA	NA	NA	NA	NA	TTKMATWWTHWDHWWWWHTDTGNTAWAAT	43.2949	36.5256	50.0769	303.667	266.744	220.154
55	NC_017022.1	sRNA_072	1735225	1735323	+	TSS:1735225_+	1735225-1735323	TEX+/-	Antisense	98	5239.51	-0.1646	yes	NA	NA	NA	NA	terminator:1735325-1735357_+	TTKMATWWTHWDHWWWWHTDTGNTAWAAT	283.485	294.869	513.202	3544.34	3129.86	5239.51
108	NC_017022.1	sRNA_073	1784702	1784782	-	TSS:1784782_-	1784702-1784782	TEX+/-	Antisense	80	396.497	-0.3148	yes	WP_002296623.1	7(9%)	NA	NA	NA	TTKMATWWTHWDHWWWWHTDTGNTAWAAT	79.6227	98.9466	130.36	396.497	291.462	342.339
81	NC_017022.1	sRNA_074	1800325	1800527	-	TSS:1800527_-	1800325-1800527	TEX+/-	Intergenic	202	1329.38	-0.2837	yes	NA	NA	NA	NA	terminator:1800325-1800374_-	TTKMATWWTHWDHWWWWHTDTGNTAWAAT	144.619	147.203	213.794	1329.38	1112.31	1202.21
73	NC_017022.1	sRNA_075	1801184	1801503	+	TSS:1801184_+	1801184-1801503	TEX+/-	Intergenic	319	2137.18	-0.2237	yes	NA	NA	NA	NA	NA	TTKMATWWTHWDHWWWWHTDTGNTAWAAT	119.043	141.946	135.849	2137.18	1560.86	1989.5
63	NC_017022.1	sRNA_076	1802762	1802837	-	TSS:1802837_-	1802762-1802837	TEX+/-	Antisense	75	3736.24	-0.2934	yes	EFAU004_RS08930;cds1842	18(24%);18(24%)	NA	NA	NA	TTKMATWWTHWDHWWWWHTDTGNTAWAAT	40.8108	57.224	80	3491.35	2977.84	3736.24
35	NC_017022.1	sRNA_077	1821061	1821171	-	TSS:1821171_-	1821061-1821171	TEX+/-	Antisense	110	9395.07	-0.2071	yes	WP_002302293.1	11(10%)	NA	NA	NA	TTKMATWWTHWDHWWWWHTDTGNTAWAAT	325.667	321.59	485.235	9094.86	7088.95	9395.07
10	NC_017022.1	sRNA_078	1821289	1821375	+	TSS:1821289_+	1821289-1821375	TEX+/-	Intergenic	86	43909.7	-0.2874	yes	NA	NA	NA	NA	NA	TTKMATWWTHWDHWWWWHTDTGNTAWAAT	131.128	204.512	296.668	33361.2	28279.3	43909.7
109	NC_017022.1	sRNA_079	1909076	1909156	-	TSS:1909156_-	1909076-1909156	TEX+/-	Antisense	80	396.497	-0.3148	yes	WP_014387097.1	7(9%)	NA	NA	NA	TTKMATWWTHWDHWWWWHTDTGNTAWAAT	79.6227	98.9466	130.36	396.497	291.462	342.367
47	NC_017022.1	sRNA_080	1915183	1915342	+	TSS:1915183_+;TSS:1915258_+	1915183-1915342;1915258-1915342	TEX+/-	Intergenic	159	7084.72	-0.1756	yes	NA	NA	NA	NA	terminator:1915286-1915340_+	TTKMATWWTHWDHWWWWHTDTGNTAWAAT	80.5253	98.4451	145.045	6680.23	5418.58	7084.72
45	NC_017022.1	sRNA_081	1915596	1915673	-	TSS:1915667_-;TSS:1915673_-	1915596-1915673	TEX+/-	Antisense	77	7478.04	-0.241	yes	WP_002297185.1	6(8%)	NA	NA	terminator:1915596-1915619_-	TTKMATWWTHWDHWWWWHTDTGNTAWAAT	85.8942	105.565	148.162	7083.1	5475.75	7478.04
102	NC_017022.1	sRNA_082	1921077	1921144	-	TSS:1921144_-	1921077-1921144	TEX+/-	Antisense	67	567.652	-0.3853	yes	NA	NA	NA	NA	NA	TTKMATWWTHWDHWWWWHTDTGNTAWAAT	49.697	66.5606	74.7273	567.652	395.152	520.288
46	NC_017022.1	sRNA_083	1940524	1940601	-	TSS:1940595_-;TSS:1940601_-	1940524-1940601	TEX+/-	Antisense	77	7478.04	-0.241	yes	EFAU004_RS09620;cds1983	6(8%);6(8%)	NA	NA	NA	TTKMATWWTHWDHWWWWHTDTGNTAWAAT	85.8942	105.565	148.162	7083.1	5475.75	7478.04
125	NC_017022.1	sRNA_084	1958164	1958241	+	TSS:1958164_+	1958164-1958241	TEX+/-	Intergenic	77	103.091	-0.0872	yes	NA	NA	NA	NA	NA	TTKMATWWTHWDHWWWWHTDTGNTAWAAT	40.9091	37.7662	39.8312	60.1169	103.091	62.9351
86	NC_017022.1	sRNA_085	1962384	1962472	-	TSS:1962472_-	1962384-1962472	TEX+/-	5'UTR	88	1153.07	-0.2225	yes	NA	NA	NA	NA	terminator:1962376-1962417_-	TTKMATWWTHWDHWWWWHTDTGNTAWAAT	32.6447	52.2763	65.6711	1153.07	1009.54	1144.32
58	NC_017022.1	sRNA_086	1981065	1981158	+	TSS:1981065_+	1981065-1981158	TEX+/-	Antisense	93	4579.41	-0.284	yes	NA	NA	EFAU004_RS09805;cds2024	7(7%);7(7%)	NA	TTKMATWWTHWDHWWWWHTDTGNTAWAAT	60.0972	56.2153	101.882	4338.82	3212.74	4579.41
64	NC_017022.1	sRNA_087	2005484	2005559	-	TSS:2005559_-	2005484-2005559	TEX+/-	Antisense	75	3736.18	-0.2934	yes	WP_002295743.1	18(24%)	NA	NA	NA	TTKMATWWTHWDHWWWWHTDTGNTAWAAT	40.8108	57.173	80	3491.22	2977.84	3736.18
53	NC_017022.1	sRNA_088	2020871	2020957	+	TSS:2020871_+	2020871-2020957	TEX+/-	Intergenic	86	5793.4	-0.0816	yes	NA	NA	NA	NA	NA	TTKMATWWTHWDHWWWWHTDTGNTAWAAT	353.437	321.724	407.023	5412.54	3438.38	5793.4
66	NC_017022.1	sRNA_089	2064665	2064855	+	TSS:2064665_+	2064665-2064855	TEX+/-	Antisense	190	3547.58	-0.3246	yes	NA	NA	WP_002296589,1	2(1%)	NA	TTKMATWWTHWDHWWWWHTDTGNTAWAAT	305.406	397.925	432.545	3526.25	3309.5	3547.58
48	NC_017022.1	sRNA_090	2077360	2077562	-	TSS:2077562_-	2077360-2077562	TEX+/-	Intergenic	202	6917.3	-0.1483	yes	NA	NA	NA	NA	NA	TTKMATWWTHWDHWWWWHTDTGNTAWAAT	272.837	235.458	387.872	6917.3	5289.82	6198.6
126	NC_017022.1	sRNA_091	2170762	2170844	+	TSS:2170762_+	2170762-2170844	TEX+/-	Intergenic	82	71.9861	-0.1916	yes	NA	NA	NA	NA	NA	TTKMATWWTHWDHWWWWHTDTGNTAWAAT	35.2083	44.2639	40.7361	57.6667	71.9861	45.1667
56	NC_017022.1	sRNA_092	2196270	2196422	-	TSS:2196422_-	2196270-2196422	TEX+/-	Antisense	152	5005.97	-0.1784	yes	WP_002330536.1	8(5%)	WP_002287744,1	10(7%)	NA	NA	85.2014	98.288	152.334	3025.24	3546.3	5005.97
2	NC_017022.1	sRNA_093	2211105	2211202	-	TSS:2211202_-	2211105-2211202	TEX+/-	Antisense	97	665865	-0.2143	yes	WP_002287759.1	8(8%)	NA	NA	NA	TTKMATWWTHWDHWWWWHTDTGNTAWAAT	1112.54	2148.95	3675.57	321317	506067	665865
75	NC_017022.1	sRNA_094	2221736	2221833	+	TSS:2221736_+;TSS:2221740_+	2221736-2221833;2221740-2221833	TEX+/-	5'UTR	97	1752.8	-0.1898	yes	NA	NA	NA	NA	NA	TTKMATWWTHWDHWWWWHTDTGNTAWAAT	101.031	76.7245	99.2143	1752.8	1650.55	1613.04
41	NC_017022.1	sRNA_095	2230203	2230364	-	TSS:2230360_-;TSS:2230364_-	2230203-2230364	TEX+/-	5'UTR	161	8169.03	-0.2346	yes	NA	NA	NA	NA	NA	TTKMATWWTHWDHWWWWHTDTGNTAWAAT	156.951	163.531	198.191	7545.03	5685.84	8169.03
116	NC_017022.1	sRNA_096	2243130	2243416	+	TSS:2243130_+	2243130-2243416	TEX+/-	Intergenic	286	312.003	-0.1979	yes	NA	NA	NA	NA	NA	TTKMATWWTHWDHWWWWHTDTGNTAWAAT	29.1463	30.2822	27.3937	312.003	225.164	239.883
52	NC_017022.1	sRNA_097	2280445	2280543	+	TSS:2280445_+	2280445-2280543	TEX+/-	3'UTR	98	5804.5	-0.4323	yes	WP_080019249.1	4(4%)	EFAU004_RS15615;cds2324	99(100%);99(100%)	terminator:2280478-2280536_+	TTKMATWWTHWDHWWWWHTDTGNTAWAAT	62.14	69.34	93.4667	5285.31	3427.85	5804.5
54	NC_017022.1	sRNA_098	2281628	2281752	+	TSS:2281628_+	2281628-2281752	TEX+/-	Intergenic	124	5686.14	-0.3984	yes	NA	NA	NA	NA	terminator:2281686-2281765_+	TTKMATWWTHWDHWWWWHTDTGNTAWAAT	461.899	619.578	686.413	4855.72	3357.19	5686.14
124	NC_017022.1	sRNA_099	2281679	2281754	-	TSS:2281754_-	2281679-2281754	TEX+/-	Intergenic	75	121.053	-0.2461	yes	NA	NA	NA	NA	NA	TTKMATWWTHWDHWWWWHTDTGNTAWAAT	45.6711	56.2895	41.8947	121.053	108.724	60.2105
91	NC_017022.1	sRNA_100	2327977	2328251	-	TSS:2328251_-	2327977-2328251	TEX+/-	5'UTR	274	949.855	-0.2902	no	NA	NA	NA	NA	NA	TTKMATWWTHWDHWWWWHTDTGNTAWAAT	246.369	226.831	368.212	815.78	949.855	879.98
8	NC_017022.1	sRNA_101	2372006	2372099	-	TSS:2372099_-	2372006-2372099	TEX+/-	Intergenic	93	48581.6	-0.216	yes	NA	NA	NA	NA	terminator:2371957-2372004_-	NA	258.939	294.5	272.439	46593.1	41233.8	48581.6
61	NC_017022.1	sRNA_102	2399090	2399171	+	TSS:2399090_+	2399090-2399171	TEX+/-	Antisense	81	3777.55	-0.289	yes	NA	NA	WP_002296840,1	7(9%)	NA	TTKMATWWTHWDHWWWWHTDTGNTAWAAT	199.633	238.118	335.579	3672.49	2759.41	3777.55
100	NC_017022.1	sRNA_103	2399700	2399798	-	TSS:2399798_-	2399700-2399798	TEX+/-	Intergenic	98	595.747	-0.3313	yes	NA	NA	NA	NA	terminator:2399716-2399736_-	TTKMATWWTHWDHWWWWHTDTGNTAWAAT	26.989	35.8681	31.1099	595.747	567.593	526.604
78	NC_017022.1	sRNA_104	2421677	2421823	-	TSS:2421823_-	2421677-2421823	TEX+/-	Intergenic	146	1635.14	-0.2007	yes	NA	NA	NA	NA	NA	NA	21.0233	28.0775	25.7364	1313.97	909.07	1635.14
3	NC_017022.1	sRNA_105	2447356	2447499	-	TSS:2447499_-	2447356-2447499	TEX+/-	Intergenic	143	144955	-0.2951	yes	NA	NA	NA	NA	NA	TTKMATWWTHWDHWWWWHTDTGNTAWAAT	1342.56	3244.02	4054.51	73271.1	105048	144955
7	NC_017022.1	sRNA_106	2488913	2489029	-	TSS:2489029_-	2488913-2489029	TEX+/-	5'UTR	116	54451.5	-0.3248	yes	NA	NA	NA	NA	terminator:2488924-2488960_-	TTKMATWWTHWDHWWWWHTDTGNTAWAAT	458.296	559.948	722.661	53351.7	48569.1	54451.5
113	NC_017022.1	sRNA_107	2497393	2497473	+	TSS:2497393_+	2497393-2497473	TEX+/-	Antisense	80	383.949	-0.3148	yes	NA	NA	EFAU004_RS15700;cds2559	7(9%);7(9%)	NA	TTKMATWWTHWDHWWWWHTDTGNTAWAAT	79.3631	98.1076	128.842	383.949	281.906	331.199
59	NC_017022.1	sRNA_108	2531418	2531523	+	TSS:2531418_+	2531418-2531523	TEX+/-	5'UTR	105	4262.42	-0.1264	yes	NA	NA	NA	NA	terminator:2531512-2531531_+	TTKMATWWTHWDHWWWWHTDTGNTAWAAT	354.068	412.966	506.443	3831.7	3116.72	4262.42
11	NC_017022.1	sRNA_109	2543403	2543512	-	TSS:2543512_-	2543403-2543512	TEX+/-	3'UTR	109	33944.4	-0.2664	yes	NA	NA	WP_002286197,1	31(28%)	terminator:2543385-2543402_-	TTKMATWWTHWDHWWWWHTDTGNTAWAAT	185.194	200.163	285.296	33944.4	24020	28854.8
27	NC_017022.1	sRNA_110	2632435	2632691	-	TSS:2632691_-	2632435-2632691	TEX+/-	5'UTR	256	12951.4	-0.286	yes	NA	NA	NA	NA	terminator:2632453-2632482_-	TTKMATWWTHWDHWWWWHTDTGNTAWAAT	231.82	255.845	251.384	12951.4	10492.7	11888.6
68	NC_017022.1	sRNA_111	2651461	2651671	-	TSS:2651586_-;TSS:2651671_-	2651461-2651671;2651586-2651671	TEX+/-	Antisense	210	3479.15	-0.1668	yes	EFAU004_RS15770;cds2681	43(20%);43(20%)	NA	NA	NA	TTKMATWWTHWDHWWWWHTDTGNTAWAAT	128.694	101.098	184.231	3017.95	2074.57	3479.15
19	NC_017022.1	sRNA_112	2740765	2740864	+	TSS:2740765_+	2740765-2740864	TEX+/-	5'UTR	99	16372.8	-0.287	yes	NA	NA	NA	NA	terminator:2740801-2740855_+	TTKMATWWTHWDHWWWWHTDTGNTAWAAT	62.7229	69.7711	117.048	13407.7	9312.96	16372.8
70	NC_017022.1	sRNA_113	2745597	2745691	-	TSS:2745691_-	2745597-2745691	TEX+/-	Intergenic	94	2218.65	-0.3432	yes	NA	NA	NA	NA	terminator:2745621-2745657_-	TTKMATWWTHWDHWWWWHTDTGNTAWAAT	41.7158	45.4105	57.1053	1925.88	1512.55	2218.65
42	NC_017022.1	sRNA_114	2772467	2772538	-	TSS:2772538_-	2772467-2772538	TEX+/-	Antisense	71	8119.16	-0.3486	yes	NA	NA	NA	NA	NA	TTKMATWWTHWDHWWWWHTDTGNTAWAAT	62.0679	77.2251	140.266	7528.71	5122.31	8119.16
82	NC_017022.1	sRNA_115	2824717	2824796	-	TSS:2824796_-	2824717-2824796	TEX+/-	Intergenic	79	1291.66	-0.2288	yes	NA	NA	NA	NA	NA	TTKMATWWTHWDHWWWWHTDTGNTAWAAT	60.52	58.8	78.3333	1249.45	979.28	1291.66
119	NC_017022.1	sRNA_116	2907881	2907993	+	TSS:2907881_+	2907881-2907993	TEX+/-	Intergenic	112	223.54	-0.1195	yes	NA	NA	NA	NA	NA	TTKMATWWTHWDHWWWWHTDTGNTAWAAT	44.469	47.2743	58.2389	223.54	215.602	222.69
105	NC_017022.1	sRNA_117	2951751	2951832	-	TSS:2951832_-	2951751-2951832	TEX+/-	5'UTR	81	515.198	-0.2915	yes	NA	NA	NA	NA	NA	TTKMATWWTHWDHWWWWHTDTGNTAWAAT	362.765	350.284	321.185	403.481	515.198	256.716
93	NC_017022.1	sRNA_118	2952413	2952511	-	TSS:2952511_-	2952413-2952511	TEX+/-	Intergenic	98	895.627	-0.401	yes	NA	NA	NA	NA	terminator:2952413-2952463_-	TTKMATWWTHWDHWWWWHTDTGNTAWAAT	145.027	156.773	204.413	895.627	733.427	635.32
5	NC_017023.1	sRNA_119	3592	3834	-	TSS:3830_-;TSS:3834_-	3592-3834	TEX+/-	Intergenic	242	123403	-0.1868	yes	WP_002303989.1;WP_002299885.1;WP_044031643.1	243(100%);220(91%);86(35%)	NA	NA	terminator:3569-3615_-	TTKMATWWTHWDHWWWWHTDTGNTAWAAT	2539.59	1946.27	3962.21	119160	87225.1	123403
92	NC_017023.1	sRNA_120	3748	3821	+	TSS:3748_+	3748-3821	TEX+/-	5'UTR	73	901.973	-0.1419	yes	WP_002303989.1;WP_002299885.1	74(100%);64(86%)	NA	NA	NA	TTKMATWWTHWDHWWWWHTDTGNTAWAAT	56.973	39.4932	81.9459	901.973	474.847	843.543
16	NC_017024.1	sRNA_121	3896	4102	+	TSS:3896_+	3896-4102	TEX+/-	Intergenic	206	19534	-0.187	yes	WP_002303989.1;WP_002299886.1	207(100%);207(100%)	NA	NA	NA	TTKMATWWTHWDHWWWWHTDTGNTAWAAT	795.271	833.3	1174.63	16525	12898.9	19534
49	NC_017024.1	sRNA_122	3922	3996	-	TSS:3996_-	3922-3996	TEX+/-	Intergenic	74	6845.31	-0.1707	yes	WP_002303989.1;WP_002299886.1	75(100%);75(100%)	NA	NA	NA	TTKMATWWTHWDHWWWWHTDTGNTAWAAT	203.88	290.72	306.96	6845.31	4393.25	6125.21
89	NC_017032.1	sRNA_123	1287	1492	+	TSS:1287_+;TSS:1425_+	1287-1492;1425-1492	TEX+/-	Intergenic	205	1013.16	-0.1374	yes	WP_002288360.1;WP_002318183.1;WP_033701079.1	49(24%);206(100%);136(66%)	NA	NA	NA	TTKMATWWTHWDHWWWWHTDTGNTAWAAT	198.254	174.471	206.526	1013.16	871.701	979.468
94	NC_017032.1	sRNA_124	1481	1599	-	TSS:1599_-	1481-1599	TEX+/-	Intergenic	118	894.592	-0.0966	yes	WP_002288361.1;WP_002318183.1;WP_033701079.1	67(56%);119(100%);119(100%)	NA	NA	NA	TTKMATWWTHWDHWWWWHTDTGNTAWAAT	249.748	374.689	478.109	800.668	643.714	894.592
44	NC_017032.1	sRNA_126	33055	33141	-	TSS:33141_-	33055-33141	TEX+/-	Intergenic	86	7570.99	-0.1172	yes	WP_002321472.1	87(100%)	NA	NA	NA	TTKMATWWTHWDHWWWWHTDTGNTAWAAT	59.963	86.9383	91.7901	7570.99	6306.35	6973.7
15	NC_017032.1	sRNA_127	41793	41866	+	TSS:41793_+	41793-41866	TEX+/-	Intergenic	73	21766.3	-0.3122	yes	WP_002288634.1	74(100%)	NA	NA	terminator:41820-41851_+	TTKMATWWTHWDHWWWWHTDTGNTAWAAT	629.149	704.041	1199.74	21766.3	19352.1	19230
13	NC_017032.1	sRNA_128	41816	42040	-	TSS:42035_-;TSS:42040_-	41816-42040	TEX+/-	Intergenic	224	25569.4	-0.1716	yes	WP_002288634.1	225(100%)	NA	NA	NA	TTKMATWWTHWDHWWWWHTDTGNTAWAAT	459.911	554.08	667.182	21919.7	15321.2	25569.4
95	NC_017032.1	sRNA_129	47469	47679	+	TSS:47469_+	47469-47679	TEX+/-	Intergenic	210	786.48	-0.1635	yes	WP_000470931.1	211(100%)	NA	NA	terminator:47645-47668_+	TTKMATWWTHWDHWWWWHTDTGNTAWAAT	73.5931	61.3284	123.069	508.578	399.554	786.48
96	NC_017032.1	sRNA_130	56390	56464	-	TSS:56464_-	56390-56464	TEX+/-	Intergenic	74	773.333	-0.14	yes	WP_000675717.1	75(100%)	NA	NA	NA	TTKMATWWTHWDHWWWWHTDTGNTAWAAT	77.24	96.64	95.4933	773.333	697.787	551.293
