# Supplementary material for: Single-Nucleotide RNA Maps for the Two Major Nosocomial Pathogens Enterococcus faecalis and Enterococcus faecium
Source: Front Cell Infect Microbiol. 2020 Nov 25;10:600325. doi: 10.3389/fcimb.2020.600325 (PMC7724050; doi:10.3389/fcimb.2020.600325)
Supplement: Supplementary Table 8 — sRNA conservation. [file Table_8.xlsx]

## Sheet: E. faecalis V583
Table S8. sRNA conservation
This table shows conservation of sRNA predicted in the E. faecalis V583 chromosome with selected species
Genomes are listed as NCBI nucleotide accession numbers
sRNAs detected in multicopy on genome 1 are listed only once by a representative sRNA - see column multicopy correspondence, which lists the ranks of the corresponding sRNAs
When multiple hits were detected in genome 2, only the hit with the highest identity score was retained
Any other sRNAs not in this list had no hits meeting the cutoff and are not conserved
sRNA name	sRNA rank	genome 1	genome 1 coordinates	genome 2	genome 2 coordinates	% identity	multicopy correspondence
sRNA_001	80	AE016830	61327-61399	CP002491	485748-485820	98.63
sRNA_001	80	AE016830	61327-61399	CP002621	60868-60940	100
sRNA_001	80	AE016830	61327-61399	CP003726	64938-65010	98.63
sRNA_001	80	AE016830	61327-61399	CP004081	60880-60952	98.63
sRNA_001	80	AE016830	61327-61399	FP929058	121276-121348	100
sRNA_001	80	AE016830	61327-61399	HF558530	66347-66419	100
sRNA_002	123	AE016830	74611-74538	CP002491	498424-498351	98.65
sRNA_002	123	AE016830	74611-74538	CP002621	74192-74119	98.65
sRNA_002	123	AE016830	74611-74538	CP004081	73603-73530	98.65
sRNA_002	123	AE016830	74611-74538	FP929058	136297-136224	98.65
sRNA_002	123	AE016830	74611-74538	HF558530	81041-80968	98.65
sRNA_006	138	AE016830	134063-134363	FP929058	216779-217060	69.86
sRNA_009	23	AE016830	198331-198495	AP012046	2287150-2286992	77.99
sRNA_009	23	AE016830	198331-198495	AP012200	137123-137283	81.37
sRNA_009	23	AE016830	198331-198495	AP012282	139002-139163	81.48
sRNA_009	23	AE016830	198331-198495	CP002491	618934-619098	100
sRNA_009	23	AE016830	198331-198495	CP002621	163298-163462	100
sRNA_009	23	AE016830	198331-198495	CP003351	97188-97343	83.33
sRNA_009	23	AE016830	198331-198495	CP003504	858621-858463	81.76
sRNA_009	23	AE016830	198331-198495	CP003583	61858-62013	83.33
sRNA_009	23	AE016830	198331-198495	CP003726	168360-168524	100
sRNA_009	23	AE016830	198331-198495	CP004063	61787-61942	83.33
sRNA_009	23	AE016830	198331-198495	CP004081	172827-172991	100
sRNA_009	23	AE016830	198331-198495	CP004856	252487-252649	84.05
sRNA_009	23	AE016830	198331-198495	CP006030	63289-63444	83.97
sRNA_009	23	AE016830	198331-198495	CP006620	61786-61941	83.33
sRNA_009	23	AE016830	198331-198495	FP929058	278847-279011	100
sRNA_009	23	AE016830	198331-198495	HF558530	167371-167535	100
sRNA_010	114	AE016830	224899-224562	CP002491	645504-645167	100
sRNA_010	114	AE016830	224899-224562	CP002621	189866-189529	100
sRNA_010	114	AE016830	224899-224562	CP003726	194928-194591	100
sRNA_010	114	AE016830	224899-224562	CP004081	199397-199060	100
sRNA_010	114	AE016830	224899-224562	CP004856	359924-359639	63.29
sRNA_010	114	AE016830	224899-224562	FP929058	305416-305079	100
sRNA_010	114	AE016830	224899-224562	HF558530	193941-193604	100
sRNA_011	110	AE016830	255799-255909	CP002491	675777-675887	100
sRNA_011	110	AE016830	255799-255909	CP002621	221450-221560	100
sRNA_011	110	AE016830	255799-255909	CP003726	225817-225927	100
sRNA_011	110	AE016830	255799-255909	CP004081	230292-230402	100
sRNA_011	110	AE016830	255799-255909	FP929058	2638593-2638483	100
sRNA_011	110	AE016830	255799-255909	HF558530	224836-224946	100
sRNA_012	28	AE016830	294473-294407	CP003726	262676-262609	95.52
sRNA_012	28	AE016830	294473-294407	CP004081	269644-269577	95.52
sRNA_013	59	AE016830	346024-346097	CP002491	728319-728392	100
sRNA_013	59	AE016830	346024-346097	CP002621	274196-274269	100
sRNA_013	59	AE016830	346024-346097	CP003726	313619-313692	100
sRNA_013	59	AE016830	346024-346097	CP004081	320598-320671	100
sRNA_013	59	AE016830	346024-346097	FP929058	2584190-2584117	100
sRNA_013	59	AE016830	346024-346097	HF558530	279050-279123	100
sRNA_014	49	AE016830	367334-367566	AP012046	2199440-2199203	66.52
sRNA_014	49	AE016830	367334-367566	CP002491	749702-749934	99.14
sRNA_014	49	AE016830	367334-367566	CP002621	295570-295802	99.57
sRNA_014	49	AE016830	367334-367566	CP003351	720768-720998	76.62
sRNA_014	49	AE016830	367334-367566	CP003504	254792-254555	61.37
sRNA_014	49	AE016830	367334-367566	CP003583	717645-717875	76.62
sRNA_014	49	AE016830	367334-367566	CP003726	335004-335236	100
sRNA_014	49	AE016830	367334-367566	CP004063	679756-679986	76.62
sRNA_014	49	AE016830	367334-367566	CP004081	341982-342214	99.14
sRNA_014	49	AE016830	367334-367566	CP004856	366309-366546	63.09
sRNA_014	49	AE016830	367334-367566	CP006030	692818-693048	76.62
sRNA_014	49	AE016830	367334-367566	CP006620	675813-676043	76.62
sRNA_014	49	AE016830	367334-367566	FP929058	2563549-2563317	99.14
sRNA_014	49	AE016830	367334-367566	HF558530	299607-299839	99.14
sRNA_015	58	AE016830	373281-373358	CP002491	756570-756647	100
sRNA_015	58	AE016830	373281-373358	CP002621	301371-301448	100
sRNA_015	58	AE016830	373281-373358	CP003351	651295-651369	78.67
sRNA_015	58	AE016830	373281-373358	CP003504	250219-250144	75
sRNA_015	58	AE016830	373281-373358	CP003583	649815-649889	78.67
sRNA_015	58	AE016830	373281-373358	CP003726	340950-341027	100
sRNA_015	58	AE016830	373281-373358	CP004063	625863-625937	78.67
sRNA_015	58	AE016830	373281-373358	CP004081	347929-348006	100
sRNA_015	58	AE016830	373281-373358	CP006030	634299-634373	80
sRNA_015	58	AE016830	373281-373358	CP006620	606339-606413	78.67
sRNA_015	58	AE016830	373281-373358	FP929058	2557369-2557292	100
sRNA_015	58	AE016830	373281-373358	HF558530	305522-305599	100
sRNA_016	62	AE016830	381640-381712	CP002491	764937-765009	100
sRNA_016	62	AE016830	381640-381712	CP002621	309745-309817	100
sRNA_016	62	AE016830	381640-381712	CP003726	349330-349402	100
sRNA_016	62	AE016830	381640-381712	CP004081	356290-356362	95.89
sRNA_016	62	AE016830	381640-381712	FP929058	2548989-2548917	100
sRNA_016	62	AE016830	381640-381712	HF558530	313902-313974	100
sRNA_020	95	AE016830	493352-493276	CP002491	902981-902905	100
sRNA_021	72	AE016830	505477-505552	CP002491	914264-914339	98.68
sRNA_021	72	AE016830	505477-505552	CP004081	495663-495738	98.68
sRNA_022	147	AE016830	505768-505872	CP002491	914555-914659	99.05
sRNA_022	147	AE016830	505768-505872	CP003726	1949090-1948984	95.24
sRNA_022	147	AE016830	505768-505872	CP004081	495954-496058	99.05
sRNA_030	67	AE016830	560880-560951	CP004063	934421-934347	73.61
sRNA_030	67	AE016830	560880-560951	CP004856	757279-757206	84.72
sRNA_031	70	AE016830	561101-561021	CP003504	2621134-2621062	82.19
sRNA_031	70	AE016830	561101-561021	CP003583	1877314-1877394	92.59
sRNA_031	70	AE016830	561101-561021	CP006030	2192509-2192440	92.86
sRNA_033	17	AE016830	587030-587230	AP012200	495625-495801	74.58
sRNA_033	17	AE016830	587030-587230	AP012282	1608990-1608814	74.01
sRNA_033	17	AE016830	587030-587230	CP002491	982875-983075	100
sRNA_033	17	AE016830	587030-587230	CP002621	378223-378423	100
sRNA_033	17	AE016830	587030-587230	CP003351	404398-404589	70.31
sRNA_033	17	AE016830	587030-587230	CP003504	654889-654698	69.27
sRNA_033	17	AE016830	587030-587230	CP003583	395702-395893	70.31
sRNA_033	17	AE016830	587030-587230	CP003726	453532-453732	99.5
sRNA_033	17	AE016830	587030-587230	CP004063	358698-358889	70.31
sRNA_033	17	AE016830	587030-587230	CP004081	563206-563406	100
sRNA_033	17	AE016830	587030-587230	CP006030	379375-379566	70.31
sRNA_033	17	AE016830	587030-587230	CP006620	345463-345654	70.31
sRNA_033	17	AE016830	587030-587230	FP929058	2453880-2453680	99
sRNA_033	17	AE016830	587030-587230	HF558530	483441-483641	99.5
sRNA_034	20	AE016830	611264-611362	CP002491	1007102-1007200	100
sRNA_034	20	AE016830	611264-611362	CP002621	402573-402671	100
sRNA_034	20	AE016830	611264-611362	CP003726	477763-477861	100
sRNA_034	20	AE016830	611264-611362	CP004081	587432-587530	100
sRNA_034	20	AE016830	611264-611362	FP929058	2429532-2429434	100
sRNA_034	20	AE016830	611264-611362	HF558530	507671-507769	100
sRNA_035	129	AE016830	632508-632600	CP002491	1030043-1030135	97.85
sRNA_035	129	AE016830	632508-632600	CP002621	431390-431481	98.91
sRNA_035	129	AE016830	632508-632600	CP003726	506897-506989	95.7
sRNA_035	129	AE016830	632508-632600	CP004081	609228-609320	97.85
sRNA_035	129	AE016830	632508-632600	FP929058	2408291-2408199	97.85
sRNA_035	129	AE016830	632508-632600	HF558530	529548-529639	98.91
sRNA_036	132	AE016830	681568-681435	CP002491	1091583-1091450	98.51
sRNA_036	132	AE016830	681568-681435	CP002621	480452-480319	100
sRNA_036	132	AE016830	681568-681435	CP003726	555950-555817	99.25
sRNA_036	132	AE016830	681568-681435	CP004081	667810-667677	99.25
sRNA_036	132	AE016830	681568-681435	FP929058	2359176-2359309	99.25
sRNA_036	132	AE016830	681568-681435	HF558530	578605-578472	99.25
sRNA_037	149	AE016830	703864-704190	CP002491	1113830-1114108	99.64
sRNA_037	149	AE016830	703864-704190	CP002621	502759-503129	99.69
sRNA_037	149	AE016830	703864-704190	CP003726	1261868-1261610	98.84
sRNA_037	149	AE016830	703864-704190	CP004081	690056-690334	99.64
sRNA_037	149	AE016830	703864-704190	HF558530	1275675-1275958	98.24
sRNA_038	115	AE016830	767818-767565	AP012046	2138912-2138664	67.87
sRNA_038	115	AE016830	767818-767565	AP012200	1710211-1710466	63.78
sRNA_038	115	AE016830	767818-767565	AP012282	444958-444702	63.78
sRNA_038	115	AE016830	767818-767565	CP002491	1177486-1177233	99.61
sRNA_038	115	AE016830	767818-767565	CP002621	567214-566961	99.61
sRNA_038	115	AE016830	767818-767565	CP003351	2328235-2327981	68.9
sRNA_038	115	AE016830	767818-767565	CP003504	1423690-1423940	67.73
sRNA_038	115	AE016830	767818-767565	CP003583	2227264-2227010	68.9
sRNA_038	115	AE016830	767818-767565	CP003726	644160-643907	99.61
sRNA_038	115	AE016830	767818-767565	CP004063	2159488-2159234	68.9
sRNA_038	115	AE016830	767818-767565	CP004081	753482-753229	99.61
sRNA_038	115	AE016830	767818-767565	CP004856	422925-423180	66.54
sRNA_038	115	AE016830	767818-767565	CP006030	2163741-2163487	69.29
sRNA_038	115	AE016830	767818-767565	CP006620	2362680-2362426	68.9
sRNA_038	115	AE016830	767818-767565	FP929058	2236402-2236654	98.42
sRNA_038	115	AE016830	767818-767565	HF558530	663708-663455	99.61
sRNA_039	14	AE016830	784369-784240	CP002491	1181101-1180972	100
sRNA_039	14	AE016830	784369-784240	CP002621	583767-583638	100
sRNA_039	14	AE016830	784369-784240	CP003726	660710-660581	99.23
sRNA_039	14	AE016830	784369-784240	CP004081	757097-756968	100
sRNA_039	14	AE016830	784369-784240	FP929058	2217760-2217889	100
sRNA_039	14	AE016830	784369-784240	HF558530	667323-667194	100
sRNA_040	12	AE016830	788993-789205	CP002491	1185584-1185796	100
sRNA_040	12	AE016830	788993-789205	CP002621	588251-588460	99.52
sRNA_040	12	AE016830	788993-789205	CP003726	667664-667876	100
sRNA_040	12	AE016830	788993-789205	CP004081	761580-761792	100
sRNA_040	12	AE016830	788993-789205	FP929058	2213277-2213068	97.62
sRNA_040	12	AE016830	788993-789205	HF558530	671805-672014	98.1
sRNA_041	128	AE016830	826029-826365	CP002491	1225005-1225341	99.7
sRNA_041	128	AE016830	826029-826365	CP002621	625272-625608	99.7
sRNA_041	128	AE016830	826029-826365	CP003726	704726-705062	99.7
sRNA_041	128	AE016830	826029-826365	CP004081	799718-800054	99.7
sRNA_041	128	AE016830	826029-826365	FP929058	2175868-2175530	99.7
sRNA_041	128	AE016830	826029-826365	HF558530	708876-709212	99.7
sRNA_042	116	AE016830	826154-826029	CP002491	1225130-1225005	100
sRNA_042	116	AE016830	826154-826029	CP002621	625397-625272	100
sRNA_042	116	AE016830	826154-826029	CP003726	704851-704726	100
sRNA_042	116	AE016830	826154-826029	CP004081	799843-799718	100
sRNA_042	116	AE016830	826154-826029	FP929058	2175741-2175868	100
sRNA_042	116	AE016830	826154-826029	HF558530	709001-708876	100
sRNA_043	32	AE016830	828523-828629	CP002491	1227499-1227605	98.13
sRNA_043	32	AE016830	828523-828629	CP002621	627766-627872	100
sRNA_043	32	AE016830	828523-828629	CP003726	707220-707326	99.07
sRNA_043	32	AE016830	828523-828629	CP004081	802212-802318	100
sRNA_043	32	AE016830	828523-828629	FP929058	2173372-2173266	99.07
sRNA_043	32	AE016830	828523-828629	HF558530	711370-711476	98.13
sRNA_044	96	AE016830	829523-829237	CP002491	1228500-1228214	99.65
sRNA_044	96	AE016830	829523-829237	CP002621	628767-628481	99.65
sRNA_044	96	AE016830	829523-829237	CP003726	708221-707935	100
sRNA_044	96	AE016830	829523-829237	CP004081	803212-802926	99.65
sRNA_044	96	AE016830	829523-829237	FP929058	2172372-2172658	99.65
sRNA_044	96	AE016830	829523-829237	HF558530	712372-712086	100
sRNA_045	126	AE016830	847974-848066	CP002491	1246951-1247043	100
sRNA_045	126	AE016830	847974-848066	CP002621	647219-647311	100
sRNA_045	126	AE016830	847974-848066	CP003726	726674-726766	100
sRNA_045	126	AE016830	847974-848066	CP004081	822731-822823	100
sRNA_045	126	AE016830	847974-848066	FP929058	2153246-2153154	100
sRNA_045	126	AE016830	847974-848066	HF558530	730823-730915	100
sRNA_046	75	AE016830	864050-864120	CP002491	1262876-1262946	100
sRNA_046	75	AE016830	864050-864120	CP002621	663144-663214	100
sRNA_046	75	AE016830	864050-864120	CP003726	743667-743737	100
sRNA_046	75	AE016830	864050-864120	CP004081	838659-838728	100
sRNA_046	75	AE016830	864050-864120	FP929058	2134078-2134008	100
sRNA_046	75	AE016830	864050-864120	HF558530	746900-746970	100
sRNA_048	134	AE016830	910240-910312	CP002491	1308878-1308950	98.63
sRNA_048	134	AE016830	910240-910312	CP002621	709150-709221	98.61
sRNA_048	134	AE016830	910240-910312	CP003726	789663-789735	98.63
sRNA_048	134	AE016830	910240-910312	CP004081	884793-884865	98.63
sRNA_048	134	AE016830	910240-910312	FP929058	2086223-2086151	98.63
sRNA_048	134	AE016830	910240-910312	HF558530	792900-792972	98.63
sRNA_049	76	AE016830	944422-944496	CP002491	1380802-1380876	97.33
sRNA_049	76	AE016830	944422-944496	CP002621	745072-745146	100
sRNA_049	76	AE016830	944422-944496	CP003726	824782-824856	98.67
sRNA_049	76	AE016830	944422-944496	CP004081	960163-960237	98.67
sRNA_049	76	AE016830	944422-944496	FP929058	2048700-2048626	100
sRNA_049	76	AE016830	944422-944496	HF558530	829875-829949	100
sRNA_050	33	AE016830	1018018-1018140	CP002491	2988555-2988433	100
sRNA_050	33	AE016830	1018018-1018140	CP002621	2691879-2691757	100
sRNA_050	33	AE016830	1018018-1018140	CP003351	2651368-2651256	94.69
sRNA_050	33	AE016830	1018018-1018140	CP003504	2737222-2737110	93.81
sRNA_050	33	AE016830	1018018-1018140	CP003583	2516414-2516302	94.69
sRNA_050	33	AE016830	1018018-1018140	CP003726	2933089-2932967	100
sRNA_050	33	AE016830	1018018-1018140	CP004063	2452150-2452038	94.69
sRNA_050	33	AE016830	1018018-1018140	CP004081	2913811-2913689	100
sRNA_050	33	AE016830	1018018-1018140	CP006030	2388829-2388717	95.58
sRNA_050	33	AE016830	1018018-1018140	CP006620	2976492-2976380	94.69
sRNA_050	33	AE016830	1018018-1018140	FP929058	5347-5225	100
sRNA_050	33	AE016830	1018018-1018140	HF558530	2763074-2762952	100
sRNA_051	102	AE016830	1024854-1024721	AP012046	2123586-2123456	65.65
sRNA_051	102	AE016830	1024854-1024721	AP012200	915199-915334	81.34
sRNA_051	102	AE016830	1024854-1024721	AP012282	1190781-1190646	81.34
sRNA_051	102	AE016830	1024854-1024721	CP002491	1461757-1461624	100
sRNA_051	102	AE016830	1024854-1024721	CP002621	874475-874342	100
sRNA_051	102	AE016830	1024854-1024721	CP003351	642758-642897	84.33
sRNA_051	102	AE016830	1024854-1024721	CP003504	2232707-2232838	86.36
sRNA_051	102	AE016830	1024854-1024721	CP003583	641278-641417	84.33
sRNA_051	102	AE016830	1024854-1024721	CP003726	904378-904245	100
sRNA_051	102	AE016830	1024854-1024721	CP004063	617326-617465	84.33
sRNA_051	102	AE016830	1024854-1024721	CP004081	1040148-1040015	100
sRNA_051	102	AE016830	1024854-1024721	CP004856	1870057-1869915	85.07
sRNA_051	102	AE016830	1024854-1024721	CP006030	625755-625894	84.33
sRNA_051	102	AE016830	1024854-1024721	CP006620	597802-597941	84.33
sRNA_051	102	AE016830	1024854-1024721	FP929058	490001-490134	100
sRNA_051	102	AE016830	1024854-1024721	HF558530	911527-911394	100
sRNA_052	29	AE016830	1053483-1053411	CP002491	1491512-1491440	100
sRNA_052	29	AE016830	1053483-1053411	CP002621	902488-902416	100
sRNA_052	29	AE016830	1053483-1053411	CP003726	932789-932717	100
sRNA_052	29	AE016830	1053483-1053411	CP004081	1068161-1068089	100
sRNA_052	29	AE016830	1053483-1053411	FP929058	461613-461685	100
sRNA_052	29	AE016830	1053483-1053411	HF558530	939540-939468	100
sRNA_053	104	AE016830	1057190-1057313	CP002491	1495219-1495342	100
sRNA_053	104	AE016830	1057190-1057313	CP002621	906195-906318	100
sRNA_053	104	AE016830	1057190-1057313	CP003726	936496-936619	100
sRNA_053	104	AE016830	1057190-1057313	CP004081	1071868-1071991	100
sRNA_053	104	AE016830	1057190-1057313	FP929058	457906-457783	100
sRNA_053	104	AE016830	1057190-1057313	HF558530	943247-943370	100
sRNA_054	44	AE016830	1067266-1066892	AP012046	826582-826952	81.94
sRNA_054	44	AE016830	1067266-1066892	AP012200	1168294-1167925	82.7
sRNA_054	44	AE016830	1067266-1066892	AP012282	935927-936296	82.7
sRNA_054	44	AE016830	1067266-1066892	CP002491	1505301-1504927	100
sRNA_054	44	AE016830	1067266-1066892	CP002621	916277-915903	99.73
sRNA_054	44	AE016830	1067266-1066892	CP003351	1820178-1820548	87.87
sRNA_054	44	AE016830	1067266-1066892	CP003504	1885242-1884869	87.97
sRNA_054	44	AE016830	1067266-1066892	CP003583	1726230-1726600	87.87
sRNA_054	44	AE016830	1067266-1066892	CP003726	948778-948405	99.73
sRNA_054	44	AE016830	1067266-1066892	CP004063	957058-956689	87.84
sRNA_054	44	AE016830	1067266-1066892	CP004081	1081949-1081575	99.73
sRNA_054	44	AE016830	1067266-1066892	CP004856	2448176-2448545	88.92
sRNA_054	44	AE016830	1067266-1066892	CP006030	1029159-1028790	88.11
sRNA_054	44	AE016830	1067266-1066892	CP006620	1839413-1839783	87.87
sRNA_054	44	AE016830	1067266-1066892	FP929058	495021-494662	99.44
sRNA_054	44	AE016830	1067266-1066892	HF558530	954642-954268	99.73
sRNA_055	130	AE016830	1108012-1108120	CP002491	1545317-1545425	100
sRNA_055	130	AE016830	1108012-1108120	CP002621	956716-956824	100
sRNA_055	130	AE016830	1108012-1108120	CP003726	989213-989321	100
sRNA_055	130	AE016830	1108012-1108120	CP004081	1122385-1122493	100
sRNA_055	130	AE016830	1108012-1108120	FP929058	535943-536051	100
sRNA_055	130	AE016830	1108012-1108120	HF558530	994517-994625	100
sRNA_056	111	AE016830	1120713-1120786	CP002491	1558018-1558091	100
sRNA_056	111	AE016830	1120713-1120786	CP002621	969417-969490	100
sRNA_056	111	AE016830	1120713-1120786	CP003726	1001914-1001987	100
sRNA_056	111	AE016830	1120713-1120786	CP004081	1135086-1135159	100
sRNA_056	111	AE016830	1120713-1120786	FP929058	550126-550199	98.65
sRNA_056	111	AE016830	1120713-1120786	HF558530	1007218-1007291	100
sRNA_057	84	AE016830	1142563-1142636	FP929058	573060-573133	100
sRNA_058	27	AE016830	1170545-1170393	CP002491	1604725-1604573	100
sRNA_058	27	AE016830	1170545-1170393	CP002621	1016130-1015978	100
sRNA_058	27	AE016830	1170545-1170393	CP003726	1048027-1047875	100
sRNA_058	27	AE016830	1170545-1170393	CP004081	1181791-1181639	100
sRNA_058	27	AE016830	1170545-1170393	FP929058	602340-602188	100
sRNA_058	27	AE016830	1170545-1170393	HF558530	1055258-1055106	100
sRNA_059	78	AE016830	1216181-1216035	CP002491	1651431-1651285	100
sRNA_059	78	AE016830	1216181-1216035	CP002621	1061769-1061623	100
sRNA_059	78	AE016830	1216181-1216035	CP003726	1093663-1093519	100
sRNA_059	78	AE016830	1216181-1216035	CP004081	1227428-1227282	100
sRNA_059	78	AE016830	1216181-1216035	FP929058	649725-649579	100
sRNA_059	78	AE016830	1216181-1216035	HF558530	1100897-1100751	99.32
sRNA_060	60	AE016830	1220623-1220829	AP012046	1183755-1183956	71.29
sRNA_060	60	AE016830	1220623-1220829	CP002491	1655872-1656078	100
sRNA_060	60	AE016830	1220623-1220829	CP002621	1066211-1066417	100
sRNA_060	60	AE016830	1220623-1220829	CP003726	1098105-1098311	100
sRNA_060	60	AE016830	1220623-1220829	CP004081	1231870-1232076	100
sRNA_060	60	AE016830	1220623-1220829	CP004856	1747376-1747180	71.07
sRNA_060	60	AE016830	1220623-1220829	FP929058	654334-654540	100
sRNA_060	60	AE016830	1220623-1220829	HF558530	1105339-1105545	100
sRNA_061	57	AE016830	1260089-1260165	CP002491	1697044-1697120	98.7
sRNA_061	57	AE016830	1260089-1260165	CP002621	1105616-1105692	98.7
sRNA_061	57	AE016830	1260089-1260165	CP003726	1139192-1139268	98.7
sRNA_061	57	AE016830	1260089-1260165	CP004081	1271242-1271318	98.7
sRNA_061	57	AE016830	1260089-1260165	FP929058	694853-694929	98.7
sRNA_061	57	AE016830	1260089-1260165	HF558530	1144849-1144925	98.7
sRNA_062	77	AE016830	1268268-1268403	AP012200	915195-915328	88.81
sRNA_062	77	AE016830	1268268-1268403	AP012282	1190785-1190652	88.81
sRNA_062	77	AE016830	1268268-1268403	CP002491	1705353-1705488	100
sRNA_062	77	AE016830	1268268-1268403	CP002621	1113794-1113929	100
sRNA_062	77	AE016830	1268268-1268403	CP003351	642752-642891	93.38
sRNA_062	77	AE016830	1268268-1268403	CP003504	258901-258764	92.65
sRNA_062	77	AE016830	1268268-1268403	CP003583	641272-641411	93.38
sRNA_062	77	AE016830	1268268-1268403	CP003726	1147501-1147636	100
sRNA_062	77	AE016830	1268268-1268403	CP004063	617320-617459	93.38
sRNA_062	77	AE016830	1268268-1268403	CP004081	1279662-1279797	100
sRNA_062	77	AE016830	1268268-1268403	CP004856	1870061-1869923	79.41
sRNA_062	77	AE016830	1268268-1268403	CP006030	625751-625888	91.91
sRNA_062	77	AE016830	1268268-1268403	CP006620	597796-597935	93.38
sRNA_062	77	AE016830	1268268-1268403	FP929058	703030-703165	100
sRNA_062	77	AE016830	1268268-1268403	HF558530	1153026-1153161	100
sRNA_063	92	AE016830	1294233-1294158	CP002491	1731325-1731250	100
sRNA_063	92	AE016830	1294233-1294158	CP002621	1139759-1139684	100
sRNA_063	92	AE016830	1294233-1294158	CP003726	1173472-1173397	100
sRNA_063	92	AE016830	1294233-1294158	CP004081	1305628-1305553	98.68
sRNA_063	92	AE016830	1294233-1294158	FP929058	729597-729522	98.68
sRNA_063	92	AE016830	1294233-1294158	HF558530	1178992-1178917	98.68
sRNA_064	125	AE016830	1323287-1323508	AP012046	2123587-2123389	57.79
sRNA_064	125	AE016830	1323287-1323508	CP002491	1769256-1769477	100
sRNA_064	125	AE016830	1323287-1323508	CP002621	1187368-1187589	100
sRNA_064	125	AE016830	1323287-1323508	CP003351	642743-642963	68.33
sRNA_064	125	AE016830	1323287-1323508	CP003504	258912-258672	70.72
sRNA_064	125	AE016830	1323287-1323508	CP003583	641263-641483	68.33
sRNA_064	125	AE016830	1323287-1323508	CP003726	1213612-1213833	100
sRNA_064	125	AE016830	1323287-1323508	CP004063	617311-617531	68.33
sRNA_064	125	AE016830	1323287-1323508	CP004081	1334606-1334827	100
sRNA_064	125	AE016830	1323287-1323508	CP004856	2000040-1999832	74.64
sRNA_064	125	AE016830	1323287-1323508	CP006030	625740-625960	67.42
sRNA_064	125	AE016830	1323287-1323508	CP006620	597787-598007	68.33
sRNA_064	125	AE016830	1323287-1323508	FP929058	759753-759974	100
sRNA_064	125	AE016830	1323287-1323508	HF558530	1210356-1210577	100
sRNA_065	135	AE016830	1343619-1343522	CP002491	1789588-1789491	100
sRNA_065	135	AE016830	1343619-1343522	CP002621	1207702-1207605	100
sRNA_065	135	AE016830	1343619-1343522	CP003726	1233925-1233828	100
sRNA_065	135	AE016830	1343619-1343522	CP004081	1354937-1354840	100
sRNA_065	135	AE016830	1343619-1343522	FP929058	780741-780644	100
sRNA_065	135	AE016830	1343619-1343522	HF558530	1230689-1230592	100
sRNA_066	15	AE016830	1345555-1345671	CP002491	1791526-1791642	99.15
sRNA_066	15	AE016830	1345555-1345671	CP002621	1209638-1209753	99.14
sRNA_066	15	AE016830	1345555-1345671	CP003726	1235860-1235975	99.14
sRNA_066	15	AE016830	1345555-1345671	CP004081	1356873-1356988	99.14
sRNA_066	15	AE016830	1345555-1345671	HF558530	1232625-1232741	99.15
sRNA_067	64	AE016830	1392106-1392270	CP002491	1837986-1838150	100
sRNA_067	64	AE016830	1392106-1392270	CP002621	1256130-1256294	99.39
sRNA_067	64	AE016830	1392106-1392270	CP003726	1282323-1282487	100
sRNA_067	64	AE016830	1392106-1392270	CP004081	1403293-1403457	100
sRNA_067	64	AE016830	1392106-1392270	HF558530	1281781-1281945	100
sRNA_068	31	AE016830	1418067-1417956	CP002491	1348277-1348177	71.29
sRNA_068	31	AE016830	1418067-1417956	CP004063	1177766-1177660	77.57
sRNA_068	31	AE016830	1418067-1417956	CP004081	1429507-1429396	99.11
sRNA_068	31	AE016830	1418067-1417956	HF558530	1875299-1875407	83.49
sRNA_069	25	AE016830	1447292-1447386	CP002491	1844923-1845017	100
sRNA_069	25	AE016830	1447292-1447386	CP002621	1263068-1263162	100
sRNA_069	25	AE016830	1447292-1447386	CP003726	1289259-1289353	100
sRNA_069	25	AE016830	1447292-1447386	CP004081	1458013-1458107	100
sRNA_069	25	AE016830	1447292-1447386	FP929058	844602-844696	100
sRNA_069	25	AE016830	1447292-1447386	HF558530	1288719-1288813	100
sRNA_070	19	AE016830	1469506-1469636	AP012200	1165575-1165465	76.58
sRNA_070	19	AE016830	1469506-1469636	AP012282	938634-938745	78.57
sRNA_070	19	AE016830	1469506-1469636	CP002491	1868940-1869070	100
sRNA_070	19	AE016830	1469506-1469636	CP002621	1287083-1287213	100
sRNA_070	19	AE016830	1469506-1469636	CP003726	1313273-1313403	100
sRNA_070	19	AE016830	1469506-1469636	CP004081	1482028-1482158	99.24
sRNA_070	19	AE016830	1469506-1469636	FP929058	869502-869632	100
sRNA_070	19	AE016830	1469506-1469636	HF558530	1312735-1312865	100
sRNA_071	26	AE016830	1495295-1495393	AP012046	2009008-2008910	81.82
sRNA_071	26	AE016830	1495295-1495393	AP012200	1120469-1120566	80.61
sRNA_071	26	AE016830	1495295-1495393	AP012282	984911-984814	80.61
sRNA_071	26	AE016830	1495295-1495393	CP002491	1899767-1899865	100
sRNA_071	26	AE016830	1495295-1495393	CP002621	1317924-1318022	100
sRNA_071	26	AE016830	1495295-1495393	CP003351	1246502-1246398	84.85
sRNA_071	26	AE016830	1495295-1495393	CP003504	2655468-2655367	80.81
sRNA_071	26	AE016830	1495295-1495393	CP003583	1085726-1085830	84.85
sRNA_071	26	AE016830	1495295-1495393	CP003726	1344099-1344197	100
sRNA_071	26	AE016830	1495295-1495393	CP004063	1456529-1456633	84.85
sRNA_071	26	AE016830	1495295-1495393	CP004081	1507816-1507914	100
sRNA_071	26	AE016830	1495295-1495393	CP004856	2363594-2363493	84.85
sRNA_071	26	AE016830	1495295-1495393	CP006030	1426260-1426363	84.85
sRNA_071	26	AE016830	1495295-1495393	CP006620	1130564-1130668	84.85
sRNA_071	26	AE016830	1495295-1495393	FP929058	900315-900413	100
sRNA_071	26	AE016830	1495295-1495393	HF558530	1344628-1344726	100
sRNA_072	47	AE016830	1553128-1553260	CP002491	1957263-1957395	100
sRNA_072	47	AE016830	1553128-1553260	CP002621	1375757-1375889	100
sRNA_072	47	AE016830	1553128-1553260	CP003726	1401530-1401662	100
sRNA_072	47	AE016830	1553128-1553260	CP004081	1565648-1565780	100
sRNA_072	47	AE016830	1553128-1553260	FP929058	958061-958193	99.25
sRNA_072	47	AE016830	1553128-1553260	HF558530	1402459-1402591	100
sRNA_073	119	AE016830	1563476-1563337	CP002491	1967612-1967473	100
sRNA_073	119	AE016830	1563476-1563337	CP002621	1386106-1385967	100
sRNA_073	119	AE016830	1563476-1563337	CP003726	1411879-1411740	100
sRNA_073	119	AE016830	1563476-1563337	CP004081	1575997-1575858	100
sRNA_073	119	AE016830	1563476-1563337	FP929058	969462-969323	100
sRNA_073	119	AE016830	1563476-1563337	HF558530	1412808-1412669	100
sRNA_074	52	AE016830	1589596-1589502	CP002491	1998860-1998766	100
sRNA_074	52	AE016830	1589596-1589502	CP002621	1412231-1412137	100
sRNA_074	52	AE016830	1589596-1589502	CP003726	1438005-1437911	100
sRNA_074	52	AE016830	1589596-1589502	CP004081	1602117-1602023	100
sRNA_074	52	AE016830	1589596-1589502	FP929058	1003389-1003295	100
sRNA_074	52	AE016830	1589596-1589502	HF558530	1444058-1443964	100
sRNA_075	122	AE016830	1591213-1590783	CP002491	2000477-2000047	100
sRNA_075	122	AE016830	1591213-1590783	CP002621	1413848-1413418	100
sRNA_075	122	AE016830	1591213-1590783	CP003726	1439622-1439192	100
sRNA_075	122	AE016830	1591213-1590783	CP004081	1603734-1603304	100
sRNA_075	122	AE016830	1591213-1590783	FP929058	1005006-1004576	100
sRNA_075	122	AE016830	1591213-1590783	HF558530	1445675-1445245	100
sRNA_076	131	AE016830	1592379-1592286	CP002491	2001643-2001550	98.94
sRNA_076	131	AE016830	1592379-1592286	CP002621	1415014-1414921	100
sRNA_076	131	AE016830	1592379-1592286	CP003726	1440788-1440695	98.94
sRNA_076	131	AE016830	1592379-1592286	CP004081	1604900-1604807	100
sRNA_076	131	AE016830	1592379-1592286	FP929058	1006172-1006079	100
sRNA_076	131	AE016830	1592379-1592286	HF558530	1446841-1446748	100
sRNA_077	101	AE016830	1595546-1595388	CP002491	2004810-2004652	100
sRNA_077	101	AE016830	1595546-1595388	CP002621	1418181-1418023	100
sRNA_077	101	AE016830	1595546-1595388	CP003726	1443955-1443797	100
sRNA_077	101	AE016830	1595546-1595388	CP004081	1608067-1607909	99.37
sRNA_077	101	AE016830	1595546-1595388	FP929058	1009339-1009181	100
sRNA_077	101	AE016830	1595546-1595388	HF558530	1450008-1449850	99.37
sRNA_079	83	AE016830	1767743-1767649	CP002621	1592293-1592199	100
sRNA_079	83	AE016830	1767743-1767649	CP003726	1619002-1618908	100
sRNA_079	83	AE016830	1767743-1767649	FP929058	1196708-1196614	100
sRNA_080	74	AE016830	1811161-1810985	CP002491	2213169-2212993	98.87
sRNA_080	74	AE016830	1811161-1810985	CP003351	1907774-1907594	87.01
sRNA_080	74	AE016830	1811161-1810985	CP003583	1815329-1815149	87.01
sRNA_080	74	AE016830	1811161-1810985	CP004081	1801986-1801810	99.44
sRNA_081	1	AE016830	1876694-1876587	AP012200	940427-940530	82.69
sRNA_081	1	AE016830	1876694-1876587	AP012282	1165530-1165427	82.69
sRNA_081	1	AE016830	1876694-1876587	CP002491	2278846-2278738	98.15
sRNA_081	1	AE016830	1876694-1876587	CP002621	1668692-1668584	100
sRNA_081	1	AE016830	1876694-1876587	CP003726	1662822-1662714	100
sRNA_081	1	AE016830	1876694-1876587	CP004081	1866812-1866704	100
sRNA_081	1	AE016830	1876694-1876587	FP929058	1239743-1239635	100
sRNA_081	1	AE016830	1876694-1876587	HF558530	1693134-1693027	100
sRNA_082	71	AE016830	1894994-1895165	CP002491	2297109-2297280	100
sRNA_082	71	AE016830	1894994-1895165	CP002621	1686848-1687019	100
sRNA_082	71	AE016830	1894994-1895165	CP003726	1681122-1681293	99.42
sRNA_082	71	AE016830	1894994-1895165	CP004081	1885166-1885337	100
sRNA_082	71	AE016830	1894994-1895165	FP929058	1258460-1258631	100
sRNA_082	71	AE016830	1894994-1895165	HF558530	1711496-1711667	99.42
sRNA_084	2	AE016830	1917729-1917933	AP012046	2174056-2174259	76.47
sRNA_084	2	AE016830	1917729-1917933	AP012200	1463975-1464160	81.18
sRNA_084	2	AE016830	1917729-1917933	AP012282	640375-640190	81.72
sRNA_084	2	AE016830	1917729-1917933	CP002491	2319845-2320049	100
sRNA_084	2	AE016830	1917729-1917933	CP002621	1711668-1711872	100
sRNA_084	2	AE016830	1917729-1917933	CP003351	2529622-2529827	79.51
sRNA_084	2	AE016830	1917729-1917933	CP003504	1326122-1325917	80.98
sRNA_084	2	AE016830	1917729-1917933	CP003583	2393209-2393414	79.51
sRNA_084	2	AE016830	1917729-1917933	CP003726	1703858-1704062	100
sRNA_084	2	AE016830	1917729-1917933	CP004063	2330632-2330837	79.51
sRNA_084	2	AE016830	1917729-1917933	CP004081	1907902-1908106	100
sRNA_084	2	AE016830	1917729-1917933	CP004856	3097147-3097350	81.37
sRNA_084	2	AE016830	1917729-1917933	CP006030	2363332-2363537	80.49
sRNA_084	2	AE016830	1917729-1917933	CP006620	2582626-2582831	79.51
sRNA_084	2	AE016830	1917729-1917933	FP929058	1281195-1281399	100
sRNA_084	2	AE016830	1917729-1917933	HF558530	1734228-1734432	100
sRNA_085	18	AE016830	1924621-1924555	CP002491	2326735-2326669	100
sRNA_085	18	AE016830	1924621-1924555	CP003726	1710748-1710682	100
sRNA_085	18	AE016830	1924621-1924555	CP004081	946993-947059	97.01
sRNA_085	18	AE016830	1924621-1924555	FP929058	1297286-1297221	95.45
sRNA_086	13	AE016830	1924736-1924659	CP002491	2326850-2326773	100
sRNA_086	13	AE016830	1924736-1924659	CP003726	1710863-1710786	100
sRNA_086	13	AE016830	1924736-1924659	FP929058	1297402-1297324	96.15
sRNA_087	8	AE016830	1926408-1926321	CP002491	2328529-2328442	97.73
sRNA_087	8	AE016830	1926408-1926321	CP003726	1713602-1713515	100
sRNA_087	8	AE016830	1926408-1926321	FP929058	1299367-1299280	100
sRNA_089	66	AE016830	1977745-1977654	CP002491	2380554-2380463	98.91
sRNA_089	66	AE016830	1977745-1977654	CP002621	1731758-1731667	100
sRNA_089	66	AE016830	1977745-1977654	CP003726	1765663-1765572	100
sRNA_089	66	AE016830	1977745-1977654	CP004081	1927853-1927762	98.91
sRNA_089	66	AE016830	1977745-1977654	FP929058	1352598-1352507	98.91
sRNA_089	66	AE016830	1977745-1977654	HF558530	1754317-1754226	100
sRNA_090	133	AE016830	2003658-2003572	CP002491	2406465-2406379	100
sRNA_090	133	AE016830	2003658-2003572	CP002621	1758001-1757915	100
sRNA_090	133	AE016830	2003658-2003572	CP003726	1792300-1792214	98.85
sRNA_090	133	AE016830	2003658-2003572	CP004081	1953961-1953875	100
sRNA_090	133	AE016830	2003658-2003572	FP929058	1378408-1378322	98.85
sRNA_090	133	AE016830	2003658-2003572	HF558530	1780692-1780606	100
sRNA_091	63	AE016830	2004415-2004138	AP012046	1877127-1876870	65.12
sRNA_091	63	AE016830	2004415-2004138	CP002491	2406935-2406658	100
sRNA_091	63	AE016830	2004415-2004138	CP002621	1758635-1758358	99.64
sRNA_091	63	AE016830	2004415-2004138	CP003351	646752-647019	66.79
sRNA_091	63	AE016830	2004415-2004138	CP003504	254791-254524	64.55
sRNA_091	63	AE016830	2004415-2004138	CP003583	645272-645539	66.79
sRNA_091	63	AE016830	2004415-2004138	CP003726	1792892-1792615	99.64
sRNA_091	63	AE016830	2004415-2004138	CP004063	621320-621587	66.79
sRNA_091	63	AE016830	2004415-2004138	CP004081	1954570-1954293	99.64
sRNA_091	63	AE016830	2004415-2004138	CP004856	366310-366574	68.3
sRNA_091	63	AE016830	2004415-2004138	CP006030	629750-630014	66.04
sRNA_091	63	AE016830	2004415-2004138	CP006620	601796-602063	66.79
sRNA_091	63	AE016830	2004415-2004138	FP929058	1379000-1378723	99.64
sRNA_091	63	AE016830	2004415-2004138	HF558530	1781464-1781187	99.64
sRNA_094	50	AE016830	2119382-2119292	AP012046	673385-673474	80
sRNA_094	50	AE016830	2119382-2119292	AP012200	1014663-1014753	91.21
sRNA_094	50	AE016830	2119382-2119292	AP012282	1090959-1090869	91.21
sRNA_094	50	AE016830	2119382-2119292	CP002491	2471868-2471778	100
sRNA_094	50	AE016830	2119382-2119292	CP002621	1827634-1827544	100
sRNA_094	50	AE016830	2119382-2119292	CP003351	2261196-2261108	89.89
sRNA_094	50	AE016830	2119382-2119292	CP003504	1501818-1501907	91.11
sRNA_094	50	AE016830	2119382-2119292	CP003583	2160228-2160140	89.89
sRNA_094	50	AE016830	2119382-2119292	CP003726	1857507-1857417	100
sRNA_094	50	AE016830	2119382-2119292	CP004063	2092078-2091990	89.89
sRNA_094	50	AE016830	2119382-2119292	CP004081	2022900-2022810	100
sRNA_094	50	AE016830	2119382-2119292	CP004856	656631-656720	88.89
sRNA_094	50	AE016830	2119382-2119292	CP006030	2092599-2092511	89.89
sRNA_094	50	AE016830	2119382-2119292	CP006620	2289321-2289233	89.89
sRNA_094	50	AE016830	2119382-2119292	FP929058	1445827-1445737	100
sRNA_094	50	AE016830	2119382-2119292	HF558530	1891418-1891329	97.78
sRNA_098	139	AE016830	2281986-2282246	CP002491	1659569-1659829	98.47
sRNA_098	139	AE016830	2281986-2282246	CP003726	2362723-2362983	98.47
sRNA_098	139	AE016830	2281986-2282246	CP004063	934214-933954	70.11
sRNA_098	139	AE016830	2281986-2282246	CP004081	435930-435674	57.59
sRNA_098	139	AE016830	2281986-2282246	CP004856	1549170-1548912	67.18
sRNA_098	139	AE016830	2281986-2282246	FP929058	2471259-2471515	57.59
sRNA_098	139	AE016830	2281986-2282246	HF558530	431123-430867	57.59
sRNA_099	69	AE016830	2288416-2288316	AP012200	1442098-1442004	80
sRNA_099	69	AE016830	2288416-2288316	AP012282	662314-662408	80
sRNA_099	69	AE016830	2288416-2288316	CP002491	2541147-2541047	100
sRNA_099	69	AE016830	2288416-2288316	CP002621	1897040-1896940	100
sRNA_099	69	AE016830	2288416-2288316	CP003351	1149080-1148992	71.91
sRNA_099	69	AE016830	2288416-2288316	CP003504	2528133-2528047	78.16
sRNA_099	69	AE016830	2288416-2288316	CP003583	1183149-1183237	71.91
sRNA_099	69	AE016830	2288416-2288316	CP003726	2051755-2051655	100
sRNA_099	69	AE016830	2288416-2288316	CP004063	1553608-1553696	71.91
sRNA_099	69	AE016830	2288416-2288316	CP004081	2089943-2089843	100
sRNA_099	69	AE016830	2288416-2288316	CP004856	2022531-2022442	71.11
sRNA_099	69	AE016830	2288416-2288316	CP006030	1524859-1524947	71.91
sRNA_099	69	AE016830	2288416-2288316	CP006620	1234056-1234144	71.91
sRNA_099	69	AE016830	2288416-2288316	FP929058	1502185-1502085	100
sRNA_099	69	AE016830	2288416-2288316	HF558530	1932211-1932111	100
sRNA_100	148	AE016830	2290885-2290813	CP002491	2543615-2543543	100
sRNA_100	148	AE016830	2290885-2290813	CP002621	1899509-1899437	100
sRNA_100	148	AE016830	2290885-2290813	CP003726	2054224-2054152	100
sRNA_100	148	AE016830	2290885-2290813	CP004081	2092412-2092340	100
sRNA_100	148	AE016830	2290885-2290813	FP929058	1504878-1504806	100
sRNA_100	148	AE016830	2290885-2290813	HF558530	1934680-1934608	100
sRNA_101	120	AE016830	2305768-2305684	CP002491	2558495-2558411	100
sRNA_101	120	AE016830	2305768-2305684	CP002621	1914392-1914308	100
sRNA_101	120	AE016830	2305768-2305684	CP003726	2069168-2069084	100
sRNA_101	120	AE016830	2305768-2305684	CP004081	2107357-2107273	100
sRNA_101	120	AE016830	2305768-2305684	FP929058	1520877-1520793	100
sRNA_101	120	AE016830	2305768-2305684	HF558530	1949625-1949541	100
sRNA_102	37	AE016830	2384527-2384441	CP002491	2670694-2670608	98.85
sRNA_102	37	AE016830	2384527-2384441	CP002621	1998827-1998741	98.85
sRNA_102	37	AE016830	2384527-2384441	CP003726	2153832-2153746	98.85
sRNA_102	37	AE016830	2384527-2384441	CP004081	2215881-2215795	98.85
sRNA_102	37	AE016830	2384527-2384441	FP929058	1643166-1643080	98.85
sRNA_102	37	AE016830	2384527-2384441	HF558530	2028036-2027950	98.85
sRNA_103	99	AE016830	2405737-2405994	CP002491	2690245-2690502	100
sRNA_103	99	AE016830	2405737-2405994	CP002621	2018661-2018918	100
sRNA_103	99	AE016830	2405737-2405994	CP003726	2173382-2173639	100
sRNA_103	99	AE016830	2405737-2405994	CP004081	2235716-2235973	100
sRNA_103	99	AE016830	2405737-2405994	FP929058	1660281-1660538	99.22
sRNA_103	99	AE016830	2405737-2405994	HF558530	2044708-2044965	100
sRNA_104	112	AE016830	2406009-2406202	CP002491	2690517-2690710	100
sRNA_104	112	AE016830	2406009-2406202	CP002621	2018933-2019126	100
sRNA_104	112	AE016830	2406009-2406202	CP003351	1532590-1532782	80.83
sRNA_104	112	AE016830	2406009-2406202	CP003504	2220345-2220160	76.88
sRNA_104	112	AE016830	2406009-2406202	CP003583	1498833-1499025	80.83
sRNA_104	112	AE016830	2406009-2406202	CP003726	2173654-2173847	100
sRNA_104	112	AE016830	2406009-2406202	CP004063	1868580-1868772	81.35
sRNA_104	112	AE016830	2406009-2406202	CP004081	2235988-2236181	100
sRNA_104	112	AE016830	2406009-2406202	CP004856	871063-871252	76.32
sRNA_104	112	AE016830	2406009-2406202	CP006030	1847689-1847881	80.83
sRNA_104	112	AE016830	2406009-2406202	CP006620	1561943-1562125	83.61
sRNA_104	112	AE016830	2406009-2406202	FP929058	1660553-1660746	98.97
sRNA_104	112	AE016830	2406009-2406202	HF558530	2044980-2045173	100
sRNA_105	124	AE016830	2418831-2418755	FP929058	1674444-1674368	100
sRNA_107	35	AE016830	2459664-2459751	FP929058	216740-216653	97.73
sRNA_108	87	AE016830	2544012-2543930	CP006030	1277440-1277359	92.68	sRNA_003;sRNA_019;sRNA_132;sRNA_093
sRNA_108	87	AE016830	2544012-2543930	CP006620	423548-423630	98.8	sRNA_003;sRNA_019;sRNA_132;sRNA_093
sRNA_108	87	AE016830	2544012-2543930	HF558530	231725-231806	92.68	sRNA_003;sRNA_019;sRNA_132;sRNA_093
sRNA_109	48	AE016830	2555152-2555058	CP002491	2799036-2798942	100
sRNA_109	48	AE016830	2555152-2555058	CP002621	2127457-2127363	100
sRNA_109	48	AE016830	2555152-2555058	CP003351	2211200-2211112	79.78
sRNA_109	48	AE016830	2555152-2555058	CP003583	2110331-2110243	79.78
sRNA_109	48	AE016830	2555152-2555058	CP003726	2282606-2282512	100
sRNA_109	48	AE016830	2555152-2555058	CP004063	681738-681826	79.78
sRNA_109	48	AE016830	2555152-2555058	CP004081	2346282-2346188	100
sRNA_109	48	AE016830	2555152-2555058	CP006030	695443-695531	79.78
sRNA_109	48	AE016830	2555152-2555058	CP006620	2198043-2197955	79.78
sRNA_109	48	AE016830	2555152-2555058	FP929058	1787690-1787596	100
sRNA_109	48	AE016830	2555152-2555058	HF558530	2155858-2155764	100
sRNA_110	141	AE016830	2558275-2558201	CP002491	2802158-2802084	100
sRNA_110	141	AE016830	2558275-2558201	CP002621	2130579-2130505	100
sRNA_110	141	AE016830	2558275-2558201	CP003726	2285728-2285654	100
sRNA_110	141	AE016830	2558275-2558201	CP004081	2349404-2349330	100
sRNA_110	141	AE016830	2558275-2558201	FP929058	1790812-1790738	98.67
sRNA_110	141	AE016830	2558275-2558201	HF558530	2158980-2158906	100
sRNA_111	40	AE016830	2578249-2578135	AP012046	711182-711294	90.27
sRNA_111	40	AE016830	2578249-2578135	AP012200	887602-887715	86.84
sRNA_111	40	AE016830	2578249-2578135	AP012282	1218504-1218391	86.84
sRNA_111	40	AE016830	2578249-2578135	CP002491	2823613-2823499	99.13
sRNA_111	40	AE016830	2578249-2578135	CP002621	2152034-2151920	99.13
sRNA_111	40	AE016830	2578249-2578135	CP003351	2489029-2488916	90.35
sRNA_111	40	AE016830	2578249-2578135	CP003504	526700-526586	90.43
sRNA_111	40	AE016830	2578249-2578135	CP003583	2352622-2352508	90.43
sRNA_111	40	AE016830	2578249-2578135	CP003726	2307178-2307064	99.13
sRNA_111	40	AE016830	2578249-2578135	CP004063	2291551-2291438	90.35
sRNA_111	40	AE016830	2578249-2578135	CP004081	2370859-2370745	99.13
sRNA_111	40	AE016830	2578249-2578135	CP004856	2145621-2145514	92.59
sRNA_111	40	AE016830	2578249-2578135	CP006030	2324388-2324275	90.35
sRNA_111	40	AE016830	2578249-2578135	CP006620	2542035-2541921	90.43
sRNA_111	40	AE016830	2578249-2578135	FP929058	1810197-1810083	99.13
sRNA_111	40	AE016830	2578249-2578135	HF558530	2180435-2180321	99.13
sRNA_112	24	AE016830	2611860-2611960	CP002491	2858323-2858423	99.01
sRNA_112	24	AE016830	2611860-2611960	CP002621	2185648-2185748	100
sRNA_112	24	AE016830	2611860-2611960	CP003726	2381879-2381979	100
sRNA_112	24	AE016830	2611860-2611960	CP004081	2405568-2405668	100
sRNA_112	24	AE016830	2611860-2611960	FP929058	1845714-1845814	100
sRNA_112	24	AE016830	2611860-2611960	HF558530	2216214-2216314	99.01
sRNA_113	45	AE016830	2632868-2632717	CP002491	2879923-2879772	100
sRNA_113	45	AE016830	2632868-2632717	CP002621	2206899-2206747	98.03
sRNA_113	45	AE016830	2632868-2632717	CP003726	2403476-2403325	100
sRNA_113	45	AE016830	2632868-2632717	CP004081	2427168-2427017	100
sRNA_113	45	AE016830	2632868-2632717	FP929058	1867187-1867036	98.68
sRNA_113	45	AE016830	2632868-2632717	HF558530	2237814-2237663	100
sRNA_114	16	AE016830	2676357-2676154	CP002491	2925138-2924935	99.51
sRNA_114	16	AE016830	2676357-2676154	CP002621	2252119-2251916	99.51
sRNA_114	16	AE016830	2676357-2676154	CP003726	2448695-2448492	100
sRNA_114	16	AE016830	2676357-2676154	CP004081	2472390-2472187	99.51
sRNA_114	16	AE016830	2676357-2676154	FP929058	1913486-1913283	100
sRNA_114	16	AE016830	2676357-2676154	HF558530	2283034-2282831	100
sRNA_115	38	AE016830	2677360-2677442	AP012046	2063641-2063720	80
sRNA_115	38	AE016830	2677360-2677442	CP002491	2926141-2926223	100
sRNA_115	38	AE016830	2677360-2677442	CP002621	2253122-2253204	100
sRNA_115	38	AE016830	2677360-2677442	CP003351	514706-514624	84.34
sRNA_115	38	AE016830	2677360-2677442	CP003504	1380485-1380403	83.13
sRNA_115	38	AE016830	2677360-2677442	CP003583	506125-506043	84.34
sRNA_115	38	AE016830	2677360-2677442	CP003726	2449699-2449781	100
sRNA_115	38	AE016830	2677360-2677442	CP004063	468827-468745	84.34
sRNA_115	38	AE016830	2677360-2677442	CP004081	2473393-2473475	100
sRNA_115	38	AE016830	2677360-2677442	CP004856	52708-52630	82.28
sRNA_115	38	AE016830	2677360-2677442	CP006030	494853-494771	84.34
sRNA_115	38	AE016830	2677360-2677442	CP006620	457139-457057	84.34
sRNA_115	38	AE016830	2677360-2677442	FP929058	1914490-1914572	100
sRNA_115	38	AE016830	2677360-2677442	HF558530	2284037-2284119	100
sRNA_116	137	AE016830	2680137-2680222	CP002491	2928917-2929002	96.51
sRNA_116	137	AE016830	2680137-2680222	CP002621	2255898-2255983	96.51
sRNA_116	137	AE016830	2680137-2680222	CP003726	2452475-2452560	100
sRNA_116	137	AE016830	2680137-2680222	CP004081	2476168-2476253	96.51
sRNA_116	137	AE016830	2680137-2680222	FP929058	1917265-1917350	96.51
sRNA_116	137	AE016830	2680137-2680222	HF558530	2286813-2286898	98.84
sRNA_117	36	AE016830	2683658-2683511	CP002491	2932439-2932292	100
sRNA_117	36	AE016830	2683658-2683511	CP002621	2259420-2259273	100
sRNA_117	36	AE016830	2683658-2683511	CP003726	2455997-2455850	100
sRNA_117	36	AE016830	2683658-2683511	CP004081	2479690-2479543	100
sRNA_117	36	AE016830	2683658-2683511	FP929058	1920786-1920639	100
sRNA_117	36	AE016830	2683658-2683511	HF558530	2290334-2290187	100
sRNA_118	21	AE016830	2741758-2741594	AP012046	1277258-1277422	75.76
sRNA_118	21	AE016830	2741758-2741594	AP012200	619729-619887	83.65
sRNA_118	21	AE016830	2741758-2741594	AP012282	1483435-1483277	83.02
sRNA_118	21	AE016830	2741758-2741594	CP002491	2954073-2953909	100
sRNA_118	21	AE016830	2741758-2741594	CP002621	2281051-2280887	100
sRNA_118	21	AE016830	2741758-2741594	CP003351	1350090-1349929	79.63
sRNA_118	21	AE016830	2741758-2741594	CP003504	2762390-2762234	81.53
sRNA_118	21	AE016830	2741758-2741594	CP003583	965990-966151	79.63
sRNA_118	21	AE016830	2741758-2741594	CP003726	2511836-2511672	100
sRNA_118	21	AE016830	2741758-2741594	CP004063	1294130-1294291	79.63
sRNA_118	21	AE016830	2741758-2741594	CP004081	2501323-2501159	100
sRNA_118	21	AE016830	2741758-2741594	CP004856	1538942-1539110	73.33
sRNA_118	21	AE016830	2741758-2741594	CP006030	1349635-1349796	79.01
sRNA_118	21	AE016830	2741758-2741594	CP006620	1022851-1023012	79.63
sRNA_118	21	AE016830	2741758-2741594	FP929058	1946251-1946087	100
sRNA_118	21	AE016830	2741758-2741594	HF558530	2311966-2311802	100
sRNA_119	34	AE016830	2746604-2746517	AP012046	2110322-2110244	84.81
sRNA_119	34	AE016830	2746604-2746517	CP002491	2961590-2961503	100
sRNA_119	34	AE016830	2746604-2746517	CP002621	2288567-2288480	100
sRNA_119	34	AE016830	2746604-2746517	CP003504	773971-774049	79.75
sRNA_119	34	AE016830	2746604-2746517	CP003726	2519352-2519265	100
sRNA_119	34	AE016830	2746604-2746517	CP004081	2508840-2508753	100
sRNA_119	34	AE016830	2746604-2746517	CP004856	353957-353878	83.75
sRNA_119	34	AE016830	2746604-2746517	FP929058	1953767-1953680	100
sRNA_119	34	AE016830	2746604-2746517	HF558530	2319484-2319397	100
sRNA_120	46	AE016830	2773664-2773444	CP002491	2988650-2988430	100
sRNA_120	46	AE016830	2773664-2773444	CP002621	2315627-2315408	98.64
sRNA_120	46	AE016830	2773664-2773444	CP003504	1515117-1515334	74.77
sRNA_120	46	AE016830	2773664-2773444	CP003726	218221-218439	100
sRNA_120	46	AE016830	2773664-2773444	CP004081	222695-222914	99.09
sRNA_120	46	AE016830	2773664-2773444	CP004856	1894377-1894175	76.85
sRNA_120	46	AE016830	2773664-2773444	FP929058	5427-5222	99.51
sRNA_120	46	AE016830	2773664-2773444	HF558530	2346563-2346343	100
sRNA_120	145	AE016830	3201675-3201570	CP002491	407444-407339	100
sRNA_120	145	AE016830	3201675-3201570	CP002621	2723037-2722932	99.06
sRNA_120	145	AE016830	3201675-3201570	CP003726	2963974-2963869	100
sRNA_120	145	AE016830	3201675-3201570	CP004081	2944686-2944581	100
sRNA_120	145	AE016830	3201675-3201570	FP929058	36532-36427	100
sRNA_120	145	AE016830	3201675-3201570	HF558530	2794129-2794024	100
sRNA_122	107	AE016830	2884115-2884038	CP002491	97512-97435	100
sRNA_122	107	AE016830	2884115-2884038	CP002621	2416633-2416556	100
sRNA_122	107	AE016830	2884115-2884038	CP003726	2650839-2650762	100
sRNA_122	107	AE016830	2884115-2884038	CP004081	2633438-2633361	100
sRNA_122	107	AE016830	2884115-2884038	FP929058	2749377-2749300	100
sRNA_122	107	AE016830	2884115-2884038	HF558530	2492384-2492307	100
sRNA_124	86	AE016830	2957235-2957014	CP002491	168161-167940	100
sRNA_124	86	AE016830	2957235-2957014	CP002621	2484992-2484771	100
sRNA_124	86	AE016830	2957235-2957014	CP003726	2723946-2723725	99.55
sRNA_124	86	AE016830	2957235-2957014	CP004081	2704516-2704295	100
sRNA_124	86	AE016830	2957235-2957014	FP929058	2820908-2820686	99.55
sRNA_124	86	AE016830	2957235-2957014	HF558530	2561308-2561086	99.55
sRNA_126	142	AE016830	2966059-2966145	CP002491	176838-176924	100
sRNA_126	142	AE016830	2966059-2966145	CP002621	2493426-2493512	100
sRNA_126	142	AE016830	2966059-2966145	CP003726	2732608-2732694	100
sRNA_126	142	AE016830	2966059-2966145	CP004081	2713194-2713280	100
sRNA_126	142	AE016830	2966059-2966145	FP929058	2829971-2830057	100
sRNA_126	142	AE016830	2966059-2966145	HF558530	2569968-2570054	100
sRNA_127	140	AE016830	3031733-3031846	AP012046	459779-459894	70.18
sRNA_127	140	AE016830	3031733-3031846	AP012200	1563959-1564081	85.09
sRNA_127	140	AE016830	3031733-3031846	AP012282	582672-582550	84.21
sRNA_127	140	AE016830	3031733-3031846	CP002491	246511-246625	91.23
sRNA_127	140	AE016830	3031733-3031846	CP002621	2561289-2561404	91.23
sRNA_127	140	AE016830	3031733-3031846	CP003504	601748-601636	72.57
sRNA_127	140	AE016830	3031733-3031846	CP003726	2799952-2800067	90.35
sRNA_127	140	AE016830	3031733-3031846	CP004081	2782919-2783033	91.23
sRNA_127	140	AE016830	3031733-3031846	CP004856	570850-570741	75.45
sRNA_127	140	AE016830	3031733-3031846	FP929058	2897842-2897956	92.11
sRNA_127	140	AE016830	3031733-3031846	HF558530	2638491-2638605	92.11
sRNA_128	108	AE016830	3031914-3032110	CP002491	245129-245325	100
sRNA_128	108	AE016830	3031914-3032110	CP002621	2561472-2561668	100
sRNA_128	108	AE016830	3031914-3032110	CP004081	2781478-2781674	100
sRNA_128	108	AE016830	3031914-3032110	FP929058	2896901-2897097	100
sRNA_128	108	AE016830	3031914-3032110	HF558530	2637550-2637746	100
sRNA_131	79	AE016830	3072959-3072867	CP002491	286330-286238	98.92
sRNA_131	79	AE016830	3072959-3072867	CP002621	2602655-2602563	98.92
sRNA_131	79	AE016830	3072959-3072867	CP003726	2839830-2839738	98.92
sRNA_131	79	AE016830	3072959-3072867	CP004081	2822735-2822643	98.92
sRNA_131	79	AE016830	3072959-3072867	FP929058	2950807-2950715	98.92
sRNA_131	79	AE016830	3072959-3072867	HF558530	2678928-2678836	100
sRNA_135	146	AE016830	3118673-3118514	AP012046	459780-459938	70.44
sRNA_135	146	AE016830	3118673-3118514	CP002491	325085-324923	86.25
sRNA_135	146	AE016830	3118673-3118514	CP002621	2641226-2641064	86.25
sRNA_135	146	AE016830	3118673-3118514	CP003504	601748-601589	69.38
sRNA_135	146	AE016830	3118673-3118514	CP003726	2799952-2800101	88
sRNA_135	146	AE016830	3118673-3118514	CP004081	2861956-2861794	86.25
sRNA_135	146	AE016830	3118673-3118514	CP004856	570850-570697	69.48
sRNA_135	146	AE016830	3118673-3118514	FP929058	2359176-2359349	62.5
sRNA_135	146	AE016830	3118673-3118514	HF558530	2721454-2721292	86.25
sRNA_138	127	AE016830	3123735-3123401	AP012046	459780-460092	73.48
sRNA_138	127	AE016830	3123735-3123401	AP012200	1563959-1564291	68.47
sRNA_138	127	AE016830	3123735-3123401	AP012282	582672-582340	67.87
sRNA_138	127	AE016830	3123735-3123401	CP002491	325085-324747	90.45
sRNA_138	127	AE016830	3123735-3123401	CP002621	2641226-2640827	85.97
sRNA_138	127	AE016830	3123735-3123401	CP003504	601748-601444	67.21
sRNA_138	127	AE016830	3123735-3123401	CP003726	2875094-2874695	86.57
sRNA_138	127	AE016830	3123735-3123401	CP004081	2861956-2861618	90.45
sRNA_138	127	AE016830	3123735-3123401	CP004856	570850-570541	73.23
sRNA_138	127	AE016830	3123735-3123401	FP929058	3000556-3000221	78.21
sRNA_138	127	AE016830	3123735-3123401	HF558530	2720817-2720418	74.33
sRNA_139	103	AE016830	3140274-3140406	CP002491	345863-345996	94.74
sRNA_139	103	AE016830	3140274-3140406	CP002621	2662024-2662157	94.74
sRNA_139	103	AE016830	3140274-3140406	CP003504	1458210-1458099	67.86
sRNA_139	103	AE016830	3140274-3140406	CP003726	2897122-2897254	100
sRNA_139	103	AE016830	3140274-3140406	CP004081	2884013-2884145	100
sRNA_139	103	AE016830	3140274-3140406	FP929058	3020104-3020236	99.25
sRNA_139	103	AE016830	3140274-3140406	HF558530	2734561-2734693	100
sRNA_152	5	AE016830	381866-381672	CP002491	765163-764969	100
sRNA_152	5	AE016830	381866-381672	CP002621	309971-309777	100
sRNA_152	5	AE016830	381866-381672	CP003726	349556-349362	98.46
sRNA_152	5	AE016830	381866-381672	CP004081	356515-356322	95.88
sRNA_152	5	AE016830	381866-381672	FP929058	2548763-2548957	100
sRNA_152	5	AE016830	381866-381672	HF558530	314128-313934	100

## Sheet: E. faecalis V583 top10
List of 10 most highly conserved E. faecalis V583 sRNAs
species are listed in the same order as in the heatmap in figure 4
species	accession number	sRNA_111	sRNA_094	sRNA_054	sRNA_071	sRNA_009	sRNA_051	sRNA_084	sRNA_118	sRNA_038	sRNA_062
E. faecium AUS0004	CP003351	90.35	89.89	87.87	84.85	83.33	84.33	79.51	79.63	68.9	93.38
E. faecium AUS00085	CP006620	90.43	89.89	87.87	84.85	83.33	84.33	79.51	79.63	68.9	93.38
E. faecium NRRL B-2354	CP004063	90.35	89.89	87.84	84.85	83.33	84.33	79.51	79.63	68.9	93.38
E. faecium DO	CP003583	90.43	89.89	87.87	84.85	83.33	84.33	79.51	79.63	68.9	93.38
E. faecium T110	CP006030	90.35	89.89	88.11	84.85	83.97	84.33	80.49	79.01	69.29	91.91
E. hirae ATCC 9790	CP003504	90.43	91.11	87.97	80.81	81.76	86.36	80.98	81.53	67.73	92.65
T. halophilus NBRC 12172	AP012046	90.27	80	81.94	81.82	77.99	65.65	76.47	75.76	67.87	x
E. casseliflavus EC20	CP004856	92.59	88.89	88.92	84.85	84.05	85.07	81.37	73.33	66.54	79.41
M. plutonius ATCC 35311	AP012200	86.84	91.21	82.7	80.61	81.37	81.34	81.18	83.65	63.78	88.81
M. plutonius DAT561	AP012282	86.84	91.21	82.7	80.61	81.48	81.34	81.72	83.02	63.78	88.81
E. faecalis 62	CP002491	99.13	100	100	100	100	100	100	100	99.61	100
E. faecalis D32	CP003726	99.13	100	99.73	100	100	100	100	100	99.61	100
E. faecalis DENG1	CP004081	99.13	100	99.73	100	100	100	100	100	99.61	100
E. faecalis str. Symbioflor 1	HF558530	99.13	97.78	99.73	100	100	100	100	100	99.61	100
E. faecalis OG1RF	CP002621	99.13	100	99.73	100	100	100	100	100	99.61	100
Enterococcus sp. 7L76	FP929058	99.13	100	99.44	100	100	100	100	100	98.42	100
E. faecalis V583	AE016830	100	100	100	100	100	100	100	100	100	100

## Sheet: E. faecium AUS0004
Table S8. sRNA conservation
This table shows conservation of sRNA predicted in the E. faecium AUS0004 chromosome with selected species
Genomes are listed as NCBI nucleotide accession numbers
sRNAs detected in multicopy on genome 1 are listed only once by a representative sRNA - see column multicopy correspondence, which lists the ranks of the corresponding sRNAs
When multiple hits were detected in genome 2, only the hit with the highest identity score was retained
Any other sRNAs not in this list had no hits meeting the cutoff and are not conserved
sRNA name	sRNA rank	genome 1	genome 1 coordinates	genome 2	genome 2 coordinates	% identity	multicopy correspondence
sRNA_001	123	CP003351	29767-29846	CP003583	24594-24673	100
sRNA_001	123	CP003351	29767-29846	CP004063	24524-24603	100
sRNA_001	123	CP003351	29767-29846	CP006030	24524-24603	100
sRNA_001	123	CP003351	29767-29846	CP006620	24523-24602	100
sRNA_002	34	CP003351	65145-65283	CP002491	576694-576832	100
sRNA_002	34	CP003351	65145-65283	CP004081	2201351-2201213	100
sRNA_002	34	CP003351	65145-65283	CP006620	572858-572994	98.54
sRNA_003	79	CP003351	154972-155052	CP002491	1021909-1021835	81.33	sRNA_053
sRNA_003	79	CP003351	154972-155052	CP003583	2311490-2311410	100	sRNA_053
sRNA_003	79	CP003351	154972-155052	CP003726	1711602-1711528	81.33	sRNA_053
sRNA_003	79	CP003351	154972-155052	CP004063	2162565-2162485	100	sRNA_053
sRNA_003	79	CP003351	154972-155052	CP004081	1640112-1640038	81.33	sRNA_053
sRNA_003	79	CP003351	154972-155052	CP006620	2198612-2198532	100	sRNA_053
sRNA_003	79	CP003351	154972-155052	HF558530	2192923-2192849	81.33	sRNA_053
sRNA_004	127	CP003351	159918-160005	CP003583	124705-124792	100
sRNA_004	127	CP003351	159918-160005	CP004063	126083-126171	100
sRNA_004	127	CP003351	159918-160005	CP006030	134469-134553	81.18
sRNA_004	127	CP003351	159918-160005	CP006620	119515-119602	100
sRNA_005	1	CP003351	178841-178760	AE016830	2611860-2611940	81.48
sRNA_005	1	CP003351	178841-178760	AP012046	2110322-2110245	84.62
sRNA_005	1	CP003351	178841-178760	CP002491	2858323-2858400	79.49
sRNA_005	1	CP003351	178841-178760	CP002621	2185648-2185728	81.48
sRNA_005	1	CP003351	178841-178760	CP003504	773971-774049	98.73
sRNA_005	1	CP003351	178841-178760	CP003583	143629-143548	100
sRNA_005	1	CP003351	178841-178760	CP003726	2381879-2381959	81.48
sRNA_005	1	CP003351	178841-178760	CP004063	145002-144921	100
sRNA_005	1	CP003351	178841-178760	CP004081	2405568-2405648	81.48
sRNA_005	1	CP003351	178841-178760	CP004856	962588-962514	85.33
sRNA_005	1	CP003351	178841-178760	CP006030	153350-153269	100
sRNA_005	1	CP003351	178841-178760	CP006620	138438-138357	100
sRNA_005	1	CP003351	178841-178760	FP929058	1845714-1845794	81.48
sRNA_005	1	CP003351	178841-178760	HF558530	2216214-2216292	81.01
sRNA_006	4	CP003351	206309-206507	CP003583	171216-171414	100
sRNA_006	4	CP003351	206309-206507	CP004063	170015-170213	100
sRNA_006	4	CP003351	206309-206507	CP006030	188832-189030	99.5
sRNA_006	4	CP003351	206309-206507	CP006620	164749-164947	100
sRNA_007	6	CP003351	213247-213353	CP003504	738819-738713	86.92
sRNA_007	6	CP003351	213247-213353	CP003583	178154-178260	100
sRNA_007	6	CP003351	213247-213353	CP004063	176952-177058	100
sRNA_007	6	CP003351	213247-213353	CP006030	195704-195810	95.33
sRNA_007	6	CP003351	213247-213353	CP006620	171687-171793	100
sRNA_008	67	CP003351	231676-231405	CP003504	725302-725573	81.25
sRNA_008	67	CP003351	231676-231405	CP003583	196581-196310	100
sRNA_008	67	CP003351	231676-231405	CP004063	195380-195109	99.63
sRNA_008	67	CP003351	231676-231405	CP006030	216973-216702	99.26
sRNA_008	67	CP003351	231676-231405	CP006620	190117-189846	100
sRNA_009	62	CP003351	286990-286919	CP003583	1874430-1874359	100	sRNA_076;sRNA_087
sRNA_009	62	CP003351	286990-286919	CP004063	942913-942842	100	sRNA_076;sRNA_087
sRNA_009	62	CP003351	286990-286919	CP006030	2267919-2267990	100	sRNA_076;sRNA_087
sRNA_009	62	CP003351	286990-286919	CP006620	2010125-2010054	100	sRNA_076;sRNA_087
sRNA_009	62	CP003351	286990-286919	HF558530	1189149-1189078	100	sRNA_076;sRNA_087
sRNA_015	114	CP003351	383492-383687	CP003504	1242782-1242978	72.45
sRNA_015	114	CP003351	383492-383687	CP003583	374798-374993	100
sRNA_015	114	CP003351	383492-383687	CP004063	337793-337988	100
sRNA_015	114	CP003351	383492-383687	CP006030	354655-354849	98.46
sRNA_015	114	CP003351	383492-383687	CP006620	324566-324761	100
sRNA_016	29	CP003351	404398-404555	AE016830	587032-587184	70.59
sRNA_016	29	CP003351	404398-404555	AP012200	495622-495771	82.67
sRNA_016	29	CP003351	404398-404555	AP012282	1608993-1608844	83.33
sRNA_016	29	CP003351	404398-404555	CP002491	982877-983029	70.59
sRNA_016	29	CP003351	404398-404555	CP002621	378225-378377	70.59
sRNA_016	29	CP003351	404398-404555	CP003504	654886-654734	84.31
sRNA_016	29	CP003351	404398-404555	CP003583	395702-395859	100
sRNA_016	29	CP003351	404398-404555	CP003726	453534-453686	70.59
sRNA_016	29	CP003351	404398-404555	CP004063	358698-358855	100
sRNA_016	29	CP003351	404398-404555	CP004081	563208-563360	70.59
sRNA_016	29	CP003351	404398-404555	CP006030	379375-379532	98.1
sRNA_016	29	CP003351	404398-404555	CP006620	345463-345620	100
sRNA_016	29	CP003351	404398-404555	FP929058	2453878-2453726	71.24
sRNA_016	29	CP003351	404398-404555	HF558530	483443-483595	70.59
sRNA_017	60	CP003351	434967-435043	CP003583	426391-426467	100
sRNA_017	60	CP003351	434967-435043	CP004063	389145-389221	100
sRNA_017	60	CP003351	434967-435043	CP006030	413501-413577	97.4
sRNA_017	60	CP003351	434967-435043	CP006620	376151-376227	100
sRNA_018	50	CP003351	504426-504333	CP003583	495844-495751	100
sRNA_018	50	CP003351	504426-504333	CP004063	458546-458453	100
sRNA_018	50	CP003351	504426-504333	CP006030	484570-484476	89.36
sRNA_018	50	CP003351	504426-504333	CP006620	446858-446765	100
sRNA_019	99	CP003351	524203-524114	CP003583	515622-515533	100
sRNA_019	99	CP003351	524203-524114	CP004063	478337-478248	100
sRNA_019	99	CP003351	524203-524114	CP006620	466526-466437	100
sRNA_021	120	CP003351	574298-574385	CP003583	565956-566043	100
sRNA_021	120	CP003351	574298-574385	CP004063	530162-530249	100
sRNA_021	120	CP003351	574298-574385	CP006030	558161-558246	95.35
sRNA_021	120	CP003351	574298-574385	CP006620	516860-516947	100
sRNA_022	14	CP003351	577464-577748	AE016830	2424004-2423727	82.01
sRNA_022	14	CP003351	577464-577748	AP012046	103635-103903	58.36
sRNA_022	14	CP003351	577464-577748	AP012200	1583728-1583457	75.37
sRNA_022	14	CP003351	577464-577748	AP012282	571669-571940	75
sRNA_022	14	CP003351	577464-577748	CP002491	2695756-2695479	82.01
sRNA_022	14	CP003351	577464-577748	CP002621	2024172-2023895	81.65
sRNA_022	14	CP003351	577464-577748	CP003504	352387-352093	84.21
sRNA_022	14	CP003351	577464-577748	CP003583	569122-569406	100
sRNA_022	14	CP003351	577464-577748	CP003726	2178893-2178616	82.01
sRNA_022	14	CP003351	577464-577748	CP004063	533328-533612	100
sRNA_022	14	CP003351	577464-577748	CP004081	2241226-2240949	82.01
sRNA_022	14	CP003351	577464-577748	CP004856	3025277-3024996	75.18
sRNA_022	14	CP003351	577464-577748	CP006030	561325-561609	100
sRNA_022	14	CP003351	577464-577748	CP006620	520026-520310	100
sRNA_022	14	CP003351	577464-577748	FP929058	1679616-1679339	82.01
sRNA_022	14	CP003351	577464-577748	HF558530	2050952-2050675	81.65
sRNA_024	74	CP003351	634211-634102	CP003583	632731-632622	100
sRNA_024	74	CP003351	634211-634102	CP004063	608779-608670	100
sRNA_024	74	CP003351	634211-634102	CP006030	613859-613751	97.25
sRNA_024	74	CP003351	634211-634102	CP006620	589255-589146	100
sRNA_025	97	CP003351	642744-642940	AE016830	1268264-1268435	89.53
sRNA_025	97	CP003351	642744-642940	AP012046	2123589-2123431	66.04
sRNA_025	97	CP003351	642744-642940	AP012200	915186-915358	87.86
sRNA_025	97	CP003351	642744-642940	AP012282	1190794-1190622	87.86
sRNA_025	97	CP003351	642744-642940	CP002491	1705349-1705520	89.53
sRNA_025	97	CP003351	642744-642940	CP002621	1113790-1113961	89.53
sRNA_025	97	CP003351	642744-642940	CP003504	258911-258715	93.4
sRNA_025	97	CP003351	642744-642940	CP003583	641264-641460	100
sRNA_025	97	CP003351	642744-642940	CP003726	1147497-1147668	89.53
sRNA_025	97	CP003351	642744-642940	CP004063	617312-617508	100
sRNA_025	97	CP003351	642744-642940	CP004081	1279658-1279831	87.36
sRNA_025	97	CP003351	642744-642940	CP004856	2000039-1999870	70.59
sRNA_025	97	CP003351	642744-642940	CP006030	625741-625937	97.97
sRNA_025	97	CP003351	642744-642940	CP006620	597788-597984	100
sRNA_025	97	CP003351	642744-642940	FP929058	703026-703197	89.53
sRNA_025	97	CP003351	642744-642940	HF558530	1153022-1153193	89.53
sRNA_026	36	CP003351	646751-647021	AE016830	367339-367596	70.16
sRNA_026	36	CP003351	646751-647021	AP012046	2199434-2199174	78.16
sRNA_026	36	CP003351	646751-647021	AP012200	1583725-1583468	55.04
sRNA_026	36	CP003351	646751-647021	AP012282	571672-571929	55.04
sRNA_026	36	CP003351	646751-647021	CP002491	749707-749966	69.23
sRNA_026	36	CP003351	646751-647021	CP002621	295575-295832	69.77
sRNA_026	36	CP003351	646751-647021	CP003504	254788-254522	81.27
sRNA_026	36	CP003351	646751-647021	CP003583	645271-645541	100
sRNA_026	36	CP003351	646751-647021	CP003726	335009-335266	70.16
sRNA_026	36	CP003351	646751-647021	CP004063	621319-621589	100
sRNA_026	36	CP003351	646751-647021	CP004081	341987-342244	69.77
sRNA_026	36	CP003351	646751-647021	CP004856	366310-366576	74.53
sRNA_026	36	CP003351	646751-647021	CP006030	629749-630015	98.5
sRNA_026	36	CP003351	646751-647021	CP006620	601795-602065	100
sRNA_026	36	CP003351	646751-647021	FP929058	2563544-2563286	69.11
sRNA_026	36	CP003351	646751-647021	HF558530	299612-299869	69.38
sRNA_027	69	CP003351	659049-659199	AP012046	2114575-2114443	80.45
sRNA_027	69	CP003351	659049-659199	CP002621	2206899-2206755	68.97
sRNA_027	69	CP003351	659049-659199	CP003583	657569-657719	100
sRNA_027	69	CP003351	659049-659199	CP004063	633617-633767	100
sRNA_027	69	CP003351	659049-659199	CP004856	2979695-2979562	79.85
sRNA_027	69	CP003351	659049-659199	CP006030	641840-641990	97.35
sRNA_027	69	CP003351	659049-659199	CP006620	614093-614243	100
sRNA_028	115	CP003351	670129-670032	CP003583	668649-668552	100
sRNA_028	115	CP003351	670129-670032	CP004063	644697-644600	98.98
sRNA_028	115	CP003351	670129-670032	CP006030	652929-652832	98.98
sRNA_028	115	CP003351	670129-670032	CP006620	625173-625076	100
sRNA_029	30	CP003351	675372-675477	CP003583	673892-673997	100
sRNA_029	30	CP003351	675372-675477	CP004063	649940-650045	99.06
sRNA_029	30	CP003351	675372-675477	CP006030	661531-661638	100
sRNA_029	30	CP003351	675372-675477	CP006620	630416-630521	100
sRNA_032	101	CP003351	824114-823989	CP003583	820993-820868	100
sRNA_032	101	CP003351	824114-823989	CP004063	1925130-1925255	99.21
sRNA_032	101	CP003351	824114-823989	CP006030	1895039-1895164	95.24
sRNA_032	101	CP003351	824114-823989	CP006620	876910-876785	100
sRNA_035	17	CP003351	831866-831782	CP003504	1854759-1854678	91.46	sRNA_060
sRNA_035	17	CP003351	831866-831782	CP003583	828284-828200	100	sRNA_060
sRNA_035	17	CP003351	831866-831782	CP004063	1919089-1919169	90.12	sRNA_060
sRNA_035	17	CP003351	831866-831782	CP006030	1979831-1979915	97.65	sRNA_060
sRNA_035	17	CP003351	831866-831782	CP006620	884660-884576	100	sRNA_060
sRNA_037	32	CP003351	860520-860627	CP003504	1884258-1884365	97.22
sRNA_037	32	CP003351	860520-860627	CP003583	856974-857081	100
sRNA_037	32	CP003351	860520-860627	CP004063	1203075-1203182	98.15
sRNA_037	32	CP003351	860520-860627	CP006030	1946212-1946105	98.15
sRNA_037	32	CP003351	860520-860627	CP006620	822275-822381	100
sRNA_038	28	CP003351	875023-875265	AP012200	915194-915438	69.14
sRNA_038	28	CP003351	875023-875265	AP012282	1190786-1190542	69.14
sRNA_038	28	CP003351	875023-875265	CP003504	2682660-2682422	71.55
sRNA_038	28	CP003351	875023-875265	CP003583	1449696-1449454	100
sRNA_038	28	CP003351	875023-875265	CP004063	1823810-1823568	100
sRNA_038	28	CP003351	875023-875265	CP006030	1787446-1787204	98.35
sRNA_038	28	CP003351	875023-875265	CP006620	1503980-1503738	99.59
sRNA_039	71	CP003351	877604-877478	CP003583	1874485-1874359	100	sRNA_014
sRNA_039	71	CP003351	877604-877478	CP004063	942968-942842	100	sRNA_014
sRNA_039	71	CP003351	877604-877478	CP006030	2267864-2267990	100	sRNA_014
sRNA_039	71	CP003351	877604-877478	CP006620	2010180-2010054	100	sRNA_014
sRNA_039	71	CP003351	877604-877478	HF558530	1189204-1189078	100	sRNA_014
sRNA_041	77	CP003351	971229-971154	CP003583	1355876-1355951	100
sRNA_041	77	CP003351	971229-971154	CP004063	1735309-1735384	100
sRNA_041	77	CP003351	971229-971154	CP006030	1705057-1705132	96.05
sRNA_041	77	CP003351	971229-971154	CP006620	1410826-1410901	100
sRNA_042	26	CP003351	974319-974247	CP003583	1352787-1352858	100
sRNA_042	26	CP003351	974319-974247	CP004063	1732219-1732291	100
sRNA_042	26	CP003351	974319-974247	CP006030	1701968-1702040	98.63
sRNA_042	26	CP003351	974319-974247	CP006620	1407738-1407809	100
sRNA_043	40	CP003351	992468-992351	CP003504	2360336-2360218	85.59
sRNA_043	40	CP003351	992468-992351	CP003583	1334625-1334742	100
sRNA_043	40	CP003351	992468-992351	CP004063	1715124-1715241	100
sRNA_043	40	CP003351	992468-992351	CP006030	1677324-1677442	99.15
sRNA_043	40	CP003351	992468-992351	CP006620	1390645-1390762	100
sRNA_044	51	CP003351	1062428-1062162	AE016830	1087613-1087863	65.34
sRNA_044	51	CP003351	1062428-1062162	AP012046	1322579-1322806	73.68
sRNA_044	51	CP003351	1062428-1062162	AP012200	1065309-1065564	59.77
sRNA_044	51	CP003351	1062428-1062162	AP012282	1040225-1039970	59.77
sRNA_044	51	CP003351	1062428-1062162	CP002491	1524919-1525172	65.35
sRNA_044	51	CP003351	1062428-1062162	CP002621	936318-936571	65.35
sRNA_044	51	CP003351	1062428-1062162	CP003504	2442979-2442728	90.48
sRNA_044	51	CP003351	1062428-1062162	CP003583	1266805-1267071	100
sRNA_044	51	CP003351	1062428-1062162	CP003726	968815-969065	65.74
sRNA_044	51	CP003351	1062428-1062162	CP004063	1647308-1647574	100
sRNA_044	51	CP003351	1062428-1062162	CP004081	1101987-1102240	65.35
sRNA_044	51	CP003351	1062428-1062162	CP004856	1838894-1838654	71.37
sRNA_044	51	CP003351	1062428-1062162	CP006030	1610734-1611004	97
sRNA_044	51	CP003351	1062428-1062162	CP006620	1320696-1320962	100
sRNA_044	51	CP003351	1062428-1062162	FP929058	515263-515518	65.23
sRNA_044	51	CP003351	1062428-1062162	HF558530	974119-974372	65.35
sRNA_046	39	CP003351	1087071-1086986	CP003583	1243637-1243722	100
sRNA_046	39	CP003351	1087071-1086986	CP004063	1614108-1614193	100
sRNA_046	39	CP003351	1087071-1086986	CP006030	1585945-1586030	97.67
sRNA_046	39	CP003351	1087071-1086986	CP006620	1296067-1296152	100
sRNA_047	90	CP003351	1092429-1092633	CP003583	1238279-1238075	100
sRNA_047	90	CP003351	1092429-1092633	CP004063	1608750-1608546	100
sRNA_047	90	CP003351	1092429-1092633	CP006030	1579255-1579056	94.5
sRNA_047	90	CP003351	1092429-1092633	CP006620	1290709-1290505	100
sRNA_048	20	CP003351	1143474-1143538	AP012046	2225918-2225854	98.46	sRNA_000;sRNA_030;sRNA_023;sRNA_045;sRNA_064
sRNA_048	20	CP003351	1143474-1143538	CP002491	2203915-2203979	98.46	sRNA_000;sRNA_030;sRNA_023;sRNA_045;sRNA_064
sRNA_048	20	CP003351	1143474-1143538	CP003504	326601-326539	90.48	sRNA_000;sRNA_030;sRNA_023;sRNA_045;sRNA_064
sRNA_048	20	CP003351	1143474-1143538	CP003583	1931752-1931688	96.92	sRNA_000;sRNA_030;sRNA_023;sRNA_045;sRNA_064
sRNA_048	20	CP003351	1143474-1143538	CP004063	2417646-2417583	93.75	sRNA_000;sRNA_030;sRNA_023;sRNA_045;sRNA_064
sRNA_048	20	CP003351	1143474-1143538	CP004856	3392275-3392211	98.46	sRNA_000;sRNA_030;sRNA_023;sRNA_045;sRNA_064
sRNA_048	20	CP003351	1143474-1143538	CP006620	1178135-1178200	100	sRNA_000;sRNA_030;sRNA_023;sRNA_045;sRNA_064
sRNA_049	128	CP003351	1154766-1154887	AP012046	1895289-1895394	72.64
sRNA_049	128	CP003351	1154766-1154887	CP003583	1177463-1177342	100
sRNA_049	128	CP003351	1154766-1154887	CP004063	1547922-1547801	100
sRNA_049	128	CP003351	1154766-1154887	CP006030	1519172-1519051	96.72
sRNA_049	128	CP003351	1154766-1154887	CP006620	1228375-1228254	100
sRNA_050	106	CP003351	1185420-1185276	CP003583	1146810-1146954	100
sRNA_050	106	CP003351	1185420-1185276	CP004063	1518680-1518824	100
sRNA_050	106	CP003351	1185420-1185276	CP006030	1491660-1491804	88.28
sRNA_050	106	CP003351	1185420-1185276	CP006620	1196211-1196355	100
sRNA_051	118	CP003351	1245416-1245319	CP003583	1086811-1086908	100
sRNA_051	118	CP003351	1245416-1245319	CP004063	1457615-1457712	100
sRNA_051	118	CP003351	1245416-1245319	CP006030	1427346-1427444	94.9
sRNA_051	118	CP003351	1245416-1245319	CP006620	1131650-1131747	100
sRNA_052	31	CP003351	1278302-1278223	CP003504	2693704-2693627	94.87
sRNA_052	31	CP003351	1278302-1278223	CP003583	1052413-1052492	100
sRNA_052	31	CP003351	1278302-1278223	CP004063	1424729-1424808	100
sRNA_052	31	CP003351	1278302-1278223	CP006620	1095721-1095800	100
sRNA_055	33	CP003351	1350088-1349854	AE016830	2741755-2741524	79.31
sRNA_055	33	CP003351	1350088-1349854	AP012046	1277261-1277489	74.67
sRNA_055	33	CP003351	1350088-1349854	AP012200	619729-619960	72.41
sRNA_055	33	CP003351	1350088-1349854	AP012282	1483435-1483204	72.41
sRNA_055	33	CP003351	1350088-1349854	CP002491	2954070-2953839	79.31
sRNA_055	33	CP003351	1350088-1349854	CP002621	2281048-2280817	79.31
sRNA_055	33	CP003351	1350088-1349854	CP003504	2762387-2762156	88.36
sRNA_055	33	CP003351	1350088-1349854	CP003583	965992-966226	100
sRNA_055	33	CP003351	1350088-1349854	CP003726	2511833-2511602	79.31
sRNA_055	33	CP003351	1350088-1349854	CP004063	1294132-1294366	100
sRNA_055	33	CP003351	1350088-1349854	CP004081	2501320-2501089	79.31
sRNA_055	33	CP003351	1350088-1349854	CP004856	1538945-1539180	74.47
sRNA_055	33	CP003351	1350088-1349854	CP006030	1349637-1349871	98.3
sRNA_055	33	CP003351	1350088-1349854	CP006620	1022853-1023087	100
sRNA_055	33	CP003351	1350088-1349854	FP929058	1946248-1946017	79.31
sRNA_055	33	CP003351	1350088-1349854	HF558530	2311963-2311732	79.31
sRNA_056	88	CP003351	1378458-1378532	CP003583	937622-937548	100
sRNA_056	88	CP003351	1378458-1378532	CP004063	1265714-1265640	100
sRNA_056	88	CP003351	1378458-1378532	CP006030	1321213-1321141	90.41
sRNA_056	88	CP003351	1378458-1378532	CP006620	994483-994409	100
sRNA_057	107	CP003351	1410878-1410800	CP003504	1839136-1839212	97.4	sRNA_073;sRNA_079;sRNA_054;sRNA_058;sRNA_040;sRNA107
sRNA_057	107	CP003351	1410878-1410800	CP003583	905204-905280	100	sRNA_073;sRNA_079;sRNA_054;sRNA_058;sRNA_040;sRNA107
sRNA_057	107	CP003351	1410878-1410800	CP004063	2494868-2494945	88.46	sRNA_073;sRNA_079;sRNA_054;sRNA_058;sRNA_040;sRNA107
sRNA_057	107	CP003351	1410878-1410800	CP006620	958617-958694	100	sRNA_073;sRNA_079;sRNA_054;sRNA_058;sRNA_040;sRNA107
sRNA_059	37	CP003351	1458268-1458464	CP003504	1925486-1925290	92.89	sRNA_036
sRNA_059	37	CP003351	1458268-1458464	CP003583	856970-856774	100	sRNA_036
sRNA_059	37	CP003351	1458268-1458464	CP004063	1203071-1202873	97.97	sRNA_036
sRNA_059	37	CP003351	1458268-1458464	CP006030	1946216-1946415	98.48	sRNA_036
sRNA_059	37	CP003351	1458268-1458464	CP006620	822271-822076	100	sRNA_036
sRNA_061	84	CP003351	1493124-1493038	CP006620	878456-878542	100	sRNA_034
sRNA_062	103	CP003351	1493226-1493141	CP006620	878354-878439	100
sRNA_063	83	CP003351	1496229-1496414	CP003583	1463994-1464179	100
sRNA_063	83	CP003351	1496229-1496414	CP004063	1835976-1836161	99.46
sRNA_063	83	CP003351	1496229-1496414	CP004856	2120915-2121089	63.43
sRNA_063	83	CP003351	1496229-1496414	CP006030	1799622-1799807	95.16
sRNA_063	83	CP003351	1496229-1496414	CP006620	1524090-1524275	99.46
sRNA_065	122	CP003351	1512176-1512411	AE016830	1886236-1886469	64.53
sRNA_065	122	CP003351	1512176-1512411	AP012200	937158-936920	62.71
sRNA_065	122	CP003351	1512176-1512411	AP012282	1168798-1169036	62.71
sRNA_065	122	CP003351	1512176-1512411	CP002491	2288206-2288439	64.53
sRNA_065	122	CP003351	1512176-1512411	CP002621	1678090-1678323	64.53
sRNA_065	122	CP003351	1512176-1512411	CP003504	2198716-2198486	85.28
sRNA_065	122	CP003351	1512176-1512411	CP003583	1478419-1478654	100
sRNA_065	122	CP003351	1512176-1512411	CP003726	1672220-1672453	64.53
sRNA_065	122	CP003351	1512176-1512411	CP004063	1850161-1850396	100
sRNA_065	122	CP003351	1512176-1512411	CP004081	1876210-1876443	64.53
sRNA_065	122	CP003351	1512176-1512411	CP004856	2425777-2426006	81.74
sRNA_065	122	CP003351	1512176-1512411	CP006030	1822924-1823159	98.73
sRNA_065	122	CP003351	1512176-1512411	CP006620	1540035-1540265	97.4
sRNA_065	122	CP003351	1512176-1512411	FP929058	1249140-1249373	64.53
sRNA_065	122	CP003351	1512176-1512411	HF558530	1702540-1702773	64.1
sRNA_066	121	CP003351	1528937-1528848	CP003583	1495180-1495091	100
sRNA_066	121	CP003351	1528937-1528848	CP006620	1558291-1558202	100
sRNA_067	87	CP003351	1532398-1532810	CP003583	1498641-1499053	100
sRNA_067	87	CP003351	1532398-1532810	CP004063	1868388-1868800	99.03
sRNA_067	87	CP003351	1532398-1532810	CP006620	1561752-1562153	99.75
sRNA_068	76	CP003351	1598740-1598597	AE016830	1513088-1513235	80.56
sRNA_068	76	CP003351	1598740-1598597	AP012046	1405303-1405447	81.94
sRNA_068	76	CP003351	1598740-1598597	CP002491	1917564-1917711	80.56
sRNA_068	76	CP003351	1598740-1598597	CP002621	1335714-1335861	80.56
sRNA_068	76	CP003351	1598740-1598597	CP003504	542046-541901	79.86
sRNA_068	76	CP003351	1598740-1598597	CP003583	1564981-1564838	100
sRNA_068	76	CP003351	1598740-1598597	CP003726	1361832-1361979	80.56
sRNA_068	76	CP003351	1598740-1598597	CP004063	1110707-1110850	100
sRNA_068	76	CP003351	1598740-1598597	CP004081	1525610-1525757	80.56
sRNA_068	76	CP003351	1598740-1598597	CP004856	1744203-1744053	80.56
sRNA_068	76	CP003351	1598740-1598597	CP006030	1220982-1221125	99.31
sRNA_068	76	CP003351	1598740-1598597	CP006620	1671997-1671854	100
sRNA_068	76	CP003351	1598740-1598597	FP929058	918317-918464	80.56
sRNA_068	76	CP003351	1598740-1598597	HF558530	1362421-1362568	80.56
sRNA_070	98	CP003351	1681648-1681796	CP003504	2087205-2087070	83.09
sRNA_070	98	CP003351	1681648-1681796	CP003583	1590766-1590914	100
sRNA_070	98	CP003351	1681648-1681796	CP004063	1084937-1084789	100
sRNA_070	98	CP003351	1681648-1681796	CP006030	1189293-1189145	91.95
sRNA_070	98	CP003351	1681648-1681796	CP006620	1697780-1697928	100
sRNA_071	117	CP003351	1726326-1726415	CP003583	1635444-1635533	100
sRNA_071	117	CP003351	1726326-1726415	CP004063	1041827-1041738	98.89
sRNA_071	117	CP003351	1726326-1726415	CP006620	1743552-1743641	100
sRNA_072	55	CP003351	1735226-1735323	CP003583	1644344-1644441	100
sRNA_072	55	CP003351	1735226-1735323	CP004063	1032883-1032786	100
sRNA_072	55	CP003351	1735226-1735323	CP006030	1130553-1130456	97.96
sRNA_072	55	CP003351	1735226-1735323	CP006620	1752452-1752549	100
sRNA_074	81	CP003351	1800525-1800325	CP003583	1708131-1707931	100
sRNA_074	81	CP003351	1800525-1800325	CP004063	973094-973294	100
sRNA_074	81	CP003351	1800525-1800325	CP006030	1071955-1072155	96.52
sRNA_074	81	CP003351	1800525-1800325	CP006620	1818220-1818020	100
sRNA_075	73	CP003351	1801186-1801501	CP003504	1933670-1933360	72.99
sRNA_075	73	CP003351	1801186-1801501	CP003583	1708792-1709107	100
sRNA_075	73	CP003351	1801186-1801501	CP004063	972434-972119	100
sRNA_075	73	CP003351	1801186-1801501	CP006030	1071298-1070983	96.84
sRNA_075	73	CP003351	1801186-1801501	CP006620	1818881-1819196	100
sRNA_077	35	CP003351	1821170-1821063	CP003504	1925490-1925596	98.13
sRNA_077	35	CP003351	1821170-1821063	CP003583	1727222-1727115	100
sRNA_077	35	CP003351	1821170-1821063	CP004063	1885819-1885713	99.07
sRNA_077	35	CP003351	1821170-1821063	CP006030	1946212-1946105	98.15
sRNA_077	35	CP003351	1821170-1821063	CP006620	1841927-1841820	100
sRNA_078	10	CP003351	1821289-1821374	CP003504	1925371-1925289	95.18
sRNA_078	10	CP003351	1821289-1821374	CP003583	1728687-1728772	100
sRNA_078	10	CP003351	1821289-1821374	CP004063	1202957-1202872	98.84
sRNA_078	10	CP003351	1821289-1821374	CP006030	1946330-1946416	98.84
sRNA_078	10	CP003351	1821289-1821374	CP006620	1842046-1842131	100
sRNA_080	47	CP003351	1915189-1915340	CP003504	1925439-1925290	85.33
sRNA_080	47	CP003351	1915189-1915340	CP003583	1822745-1822896	100
sRNA_080	47	CP003351	1915189-1915340	CP004063	945802-945651	100
sRNA_080	47	CP003351	1915189-1915340	CP006030	1067516-1067365	99.34
sRNA_080	47	CP003351	1915189-1915340	CP006620	1931667-1931818	100
sRNA_081	45	CP003351	1915672-1915597	AP012046	2225924-2225849	98.68	sRNA_083
sRNA_081	45	CP003351	1915672-1915597	CP002491	2203909-2203984	98.68	sRNA_083
sRNA_081	45	CP003351	1915672-1915597	CP003504	326609-326534	90.79	sRNA_083
sRNA_081	45	CP003351	1915672-1915597	CP003583	1931758-1931683	100	sRNA_083
sRNA_081	45	CP003351	1915672-1915597	CP004063	2417652-2417580	93.15	sRNA_083
sRNA_081	45	CP003351	1915672-1915597	CP004856	3392281-3392206	98.68	sRNA_083
sRNA_081	45	CP003351	1915672-1915597	CP006620	1633982-1633910	100	sRNA_083
sRNA_084	125	CP003351	1958165-1958240	CP003583	1864047-1864122	100
sRNA_084	125	CP003351	1958165-1958240	CP004063	871839-871764	100
sRNA_084	125	CP003351	1958165-1958240	CP006030	910167-910092	94.74
sRNA_084	125	CP003351	1958165-1958240	CP006620	1965622-1965697	98.68
sRNA_085	86	CP003351	1962472-1962385	CP003504	1769318-1769403	83.72
sRNA_085	86	CP003351	1962472-1962385	CP003583	1868351-1868264	97.73
sRNA_085	86	CP003351	1962472-1962385	CP004063	867535-867622	97.73
sRNA_085	86	CP003351	1962472-1962385	CP006030	905855-905942	97.73
sRNA_085	86	CP003351	1962472-1962385	CP006620	1969923-1969836	97.73
sRNA_086	58	CP003351	1981065-1981155	CP002491	1021910-1021821	100
sRNA_086	58	CP003351	1981065-1981155	CP003583	2311489-2311401	80.9
sRNA_086	58	CP003351	1981065-1981155	CP003726	1711603-1711514	100
sRNA_086	58	CP003351	1981065-1981155	CP004063	940779-940868	100
sRNA_086	58	CP003351	1981065-1981155	CP004081	1640113-1640024	100
sRNA_086	58	CP003351	1981065-1981155	CP006620	2612607-2612518	100
sRNA_086	58	CP003351	1981065-1981155	HF558530	2192924-2192835	100
sRNA_088	53	CP003351	2020872-2020957	CP003583	1929753-1929838	100
sRNA_088	53	CP003351	2020872-2020957	CP004063	832989-832904	100
sRNA_088	53	CP003351	2020872-2020957	CP006030	862843-862758	96.51
sRNA_088	53	CP003351	2020872-2020957	CP006620	2026841-2026926	97.67
sRNA_089	66	CP003351	2064665-2064853	CP003504	1704363-1704180	79.35
sRNA_089	66	CP003351	2064665-2064853	CP003583	1977412-1977600	99.47
sRNA_089	66	CP003351	2064665-2064853	CP004063	789192-789004	99.47
sRNA_089	66	CP003351	2064665-2064853	CP006030	815285-815097	96.3
sRNA_089	66	CP003351	2064665-2064853	CP006620	2075044-2075232	100
sRNA_090	48	CP003351	2077560-2077362	CP003504	1690735-1690922	73.4
sRNA_090	48	CP003351	2077560-2077362	CP003583	1990304-1990106	99.5
sRNA_090	48	CP003351	2077560-2077362	CP004063	774792-774990	100
sRNA_090	48	CP003351	2077560-2077362	CP006030	802393-802587	93.85
sRNA_090	48	CP003351	2077560-2077362	CP006620	2087938-2087740	100
sRNA_091	126	CP003351	2170762-2170843	CP003583	2083635-2083716	100
sRNA_092	56	CP003351	2196416-2196271	AE016830	1830954-1830811	75.69
sRNA_092	56	CP003351	2196416-2196271	CP002491	2232976-2232833	75.69
sRNA_092	56	CP003351	2196416-2196271	CP003583	1827450-1827305	100
sRNA_092	56	CP003351	2196416-2196271	CP004081	484360-484217	75.69
sRNA_092	56	CP003351	2196416-2196271	CP006620	938348-938492	100
sRNA_093	2	CP003351	2211201-2211106	CP003583	2110332-2110237	100
sRNA_093	2	CP003351	2211201-2211106	CP004063	681737-681832	100
sRNA_093	2	CP003351	2211201-2211106	CP006030	695442-695537	100
sRNA_093	2	CP003351	2211201-2211106	CP006620	2198044-2197949	100
sRNA_094	75	CP003351	2221737-2221832	CP003504	1548764-1548674	89.01
sRNA_094	75	CP003351	2221737-2221832	CP003583	2120868-2120963	100
sRNA_094	75	CP003351	2221737-2221832	CP004063	2034899-2034994	100
sRNA_094	75	CP003351	2221737-2221832	CP006030	2055071-2055166	98.96
sRNA_094	75	CP003351	2221737-2221832	CP006620	2208578-2208673	100
sRNA_095	41	CP003351	2230362-2230203	AE016830	2812607-2812454	63.64
sRNA_095	41	CP003351	2230362-2230203	AP012046	965831-965979	73.83
sRNA_095	41	CP003351	2230362-2230203	CP002491	38923-38770	63.64
sRNA_095	41	CP003351	2230362-2230203	CP002621	2354573-2354420	63.64
sRNA_095	41	CP003351	2230362-2230203	CP003504	1540279-1540463	80
sRNA_095	41	CP003351	2230362-2230203	CP003583	2129494-2129335	100
sRNA_095	41	CP003351	2230362-2230203	CP003726	2585356-2585203	63.64
sRNA_095	41	CP003351	2230362-2230203	CP004063	2043525-2043366	100
sRNA_095	41	CP003351	2230362-2230203	CP004081	2574849-2574696	63.64
sRNA_095	41	CP003351	2230362-2230203	CP006030	2063587-2063428	100
sRNA_095	41	CP003351	2230362-2230203	CP006620	2257049-2256890	100
sRNA_095	41	CP003351	2230362-2230203	FP929058	2678270-2678117	63.64
sRNA_095	41	CP003351	2230362-2230203	HF558530	2420577-2420424	63.64
sRNA_096	116	CP003351	2243130-2243415	CP003583	2142261-2142546	100
sRNA_096	116	CP003351	2243130-2243415	CP004063	2056293-2056578	100
sRNA_096	116	CP003351	2243130-2243415	CP006030	2075997-2076282	97.2
sRNA_096	116	CP003351	2243130-2243415	CP006620	2269817-2270102	100
sRNA_097	52	CP003351	2280445-2280541	CP003583	2179478-2179574	100
sRNA_097	52	CP003351	2280445-2280541	CP004063	2111328-2111424	100
sRNA_097	52	CP003351	2280445-2280541	CP006030	2111924-2112019	95.83
sRNA_097	52	CP003351	2280445-2280541	CP006620	2310092-2310188	100
sRNA_098	54	CP003351	2281628-2281751	AP012046	1895288-1895397	78.18
sRNA_098	54	CP003351	2281628-2281751	CP003504	1484626-1484505	86.89
sRNA_098	54	CP003351	2281628-2281751	CP003583	2180662-2180785	100
sRNA_098	54	CP003351	2281628-2281751	CP004063	2112512-2112635	100
sRNA_098	54	CP003351	2281628-2281751	CP006030	2113109-2113232	99.19
sRNA_098	54	CP003351	2281628-2281751	CP006620	2311276-2311399	100
sRNA_099	124	CP003351	2281753-2281680	CP003504	1484503-1484576	83.78
sRNA_099	124	CP003351	2281753-2281680	CP003583	2180787-2180714	100
sRNA_099	124	CP003351	2281753-2281680	CP004063	2112637-2112564	100
sRNA_099	124	CP003351	2281753-2281680	CP006030	2113234-2113161	100
sRNA_099	124	CP003351	2281753-2281680	CP006620	2311401-2311328	100
sRNA_100	91	CP003351	2328245-2327982	AE016830	767822-767567	67.19
sRNA_100	91	CP003351	2328245-2327982	AP012046	2138925-2138668	72.09
sRNA_100	91	CP003351	2632672-2632445	AP012200	1715842-1715597	58.77
sRNA_100	91	CP003351	2328245-2327982	AP012282	439325-439570	58.54
sRNA_100	91	CP003351	2328245-2327982	CP002491	1177490-1177235	66.8
sRNA_100	91	CP003351	2328245-2327982	CP002621	567218-566963	66.8
sRNA_100	91	CP003351	2328245-2327982	CP003504	1423680-1423939	85
sRNA_100	91	CP003351	2632672-2632445	CP003583	2496439-2496212	100
sRNA_100	91	CP003351	2328245-2327982	CP003726	644164-643909	66.8
sRNA_100	91	CP003351	2328245-2327982	CP004063	2159498-2159235	100
sRNA_100	91	CP003351	2328245-2327982	CP004081	753486-753231	66.8
sRNA_100	91	CP003351	2328245-2327982	CP004856	422916-423179	70.08
sRNA_100	91	CP003351	2328245-2327982	CP006030	2163751-2163488	98.86
sRNA_100	91	CP003351	2328245-2327982	CP006620	2362690-2362427	100
sRNA_100	91	CP003351	2328245-2327982	FP929058	2236398-2236653	67.19
sRNA_100	91	CP003351	2328245-2327982	HF558530	663712-663457	67.58
sRNA_101	8	CP003351	2372098-2372007	CP003583	2271128-2271037	100
sRNA_101	8	CP003351	2372098-2372007	CP004063	2204173-2204082	100
sRNA_101	8	CP003351	2372098-2372007	CP006030	2216693-2216610	95.24
sRNA_101	8	CP003351	2372098-2372007	CP006620	2407800-2407709	100
sRNA_102	61	CP003351	2399090-2399170	CP003583	2298121-2298201	100
sRNA_102	61	CP003351	2399090-2399170	CP006620	914137-914057	100
sRNA_104	78	CP003351	2421823-2421679	CP003504	1860943-1861089	82.07
sRNA_104	78	CP003351	2421823-2421679	CP003583	834333-834470	86.23
sRNA_104	78	CP003351	2421823-2421679	CP006030	1974071-1973925	97.24
sRNA_104	78	CP003351	2421823-2421679	CP006620	799323-799465	98.6
sRNA_105	3	CP003351	2447498-2447358	CP003583	2311096-2310956	100
sRNA_105	3	CP003351	2447498-2447358	CP004063	2242667-2242527	100
sRNA_105	3	CP003351	2447498-2447358	CP006030	2258583-2258449	99.26
sRNA_106	7	CP003351	2489029-2488917	AE016830	2578249-2578137	90.27
sRNA_106	7	CP003351	2489029-2488917	AP012046	711182-711293	93.75
sRNA_106	7	CP003351	2489029-2488917	AP012200	887602-887714	91.15
sRNA_106	7	CP003351	2489029-2488917	AP012282	1218504-1218392	91.15
sRNA_106	7	CP003351	2489029-2488917	CP002491	2823613-2823501	90.27
sRNA_106	7	CP003351	2489029-2488917	CP002621	2152034-2151922	90.27
sRNA_106	7	CP003351	2489029-2488917	CP003504	526700-526588	100
sRNA_106	7	CP003351	2489029-2488917	CP003583	2352622-2352510	100
sRNA_106	7	CP003351	2489029-2488917	CP003726	2307178-2307066	90.27
sRNA_106	7	CP003351	2489029-2488917	CP004063	2291551-2291439	100
sRNA_106	7	CP003351	2489029-2488917	CP004081	2370859-2370747	90.27
sRNA_106	7	CP003351	2489029-2488917	CP004856	2145621-2145516	96.23
sRNA_106	7	CP003351	2489029-2488917	CP006030	2324388-2324276	100
sRNA_106	7	CP003351	2489029-2488917	CP006620	2542035-2541923	100
sRNA_106	7	CP003351	2489029-2488917	FP929058	1810197-1810085	90.27
sRNA_106	7	CP003351	2489029-2488917	HF558530	2180435-2180323	90.27
sRNA_108	59	CP003351	2531418-2531523	AP012046	317310-317413	75
sRNA_108	59	CP003351	2531418-2531523	CP003583	2395005-2395110	100
sRNA_108	59	CP003351	2531418-2531523	CP004063	2332428-2332533	100
sRNA_108	59	CP003351	2531418-2531523	CP004856	3103292-3103398	95.28
sRNA_108	59	CP003351	2531418-2531523	CP006620	2584421-2584526	100
sRNA_109	11	CP003351	2543512-2543404	CP003583	2407100-2406992	100
sRNA_109	11	CP003351	2543512-2543404	CP004063	2344522-2344414	100
sRNA_109	11	CP003351	2543512-2543404	CP006030	2374485-2374377	96.33
sRNA_109	11	CP003351	2543512-2543404	CP006620	2596515-2596407	100
sRNA_110	27	CP003351	2632676-2632443	AE016830	761249-761498	70.94
sRNA_110	27	CP003351	2632676-2632443	AP012046	120036-120245	73.81
sRNA_110	27	CP003351	2632676-2632443	AP012200	1715842-1715597	68.8
sRNA_110	27	CP003351	2632676-2632443	AP012282	439324-439570	69.23
sRNA_110	27	CP003351	2632676-2632443	CP002491	1170920-1171169	70.94
sRNA_110	27	CP003351	2632676-2632443	CP002621	560646-560895	70.94
sRNA_110	27	CP003351	2632676-2632443	CP003504	1151653-1151890	85.9
sRNA_110	27	CP003351	2632676-2632443	CP003583	2496443-2496210	100
sRNA_110	27	CP003351	2632676-2632443	CP003726	636257-636506	70.94
sRNA_110	27	CP003351	2632676-2632443	CP004063	2433029-2432796	100
sRNA_110	27	CP003351	2632676-2632443	CP004081	746916-747165	70.94
sRNA_110	27	CP003351	2632676-2632443	CP004856	3137249-3137007	67.52
sRNA_110	27	CP003351	2632676-2632443	CP006030	2449193-2448961	96.14
sRNA_110	27	CP003351	2632676-2632443	CP006620	2688261-2688028	100
sRNA_110	27	CP003351	2632676-2632443	FP929058	2247113-2246864	70.94
sRNA_110	27	CP003351	2632676-2632443	HF558530	657140-657389	70.94
sRNA_111	68	CP003351	2651671-2651461	CP003583	2516719-2516509	100
sRNA_111	68	CP003351	2651671-2651461	CP004063	425418-425615	100
sRNA_111	68	CP003351	2651671-2651461	CP006030	2471353-2471142	96.21
sRNA_111	68	CP003351	2651671-2651461	CP006620	2708461-2708251	100
sRNA_112	19	CP003351	2740765-2740862	CP003583	2604067-2604164	100
sRNA_112	19	CP003351	2740765-2740862	CP004063	2541433-2541530	100
sRNA_112	19	CP003351	2740765-2740862	CP006030	2561703-2561800	98.98
sRNA_112	19	CP003351	2740765-2740862	CP006620	2797434-2797531	100
sRNA_113	70	CP003351	2745691-2745597	CP003504	881547-881641	76.84
sRNA_113	70	CP003351	2745691-2745597	CP003583	2608993-2608899	100
sRNA_113	70	CP003351	2745691-2745597	CP004063	2546359-2546265	100
sRNA_113	70	CP003351	2745691-2745597	CP006030	2566709-2566615	97.89
sRNA_113	70	CP003351	2745691-2745597	CP006620	2802441-2802347	100
sRNA_114	42	CP003351	2772536-2772469	AE016830	1802188-1802255	100
sRNA_114	42	CP003351	2772536-2772469	CP002491	2188824-2188891	98.53
sRNA_114	42	CP003351	2772536-2772469	CP003583	246542-246475	100
sRNA_114	42	CP003351	2772536-2772469	CP004081	1793012-1793079	100
sRNA_114	42	CP003351	2772536-2772469	CP006030	993589-993521	95.59
sRNA_114	42	CP003351	2772536-2772469	CP006620	1843401-1843333	91.18
sRNA_114	42	CP003351	2772536-2772469	FP929058	2463423-2463355	98.53
sRNA_114	42	CP003351	2772536-2772469	HF558530	438959-439027	98.53
sRNA_115	82	CP003351	2824796-2824719	CP002491	2204198-2204120	96.15
sRNA_115	82	CP003351	2824796-2824719	CP006620	2876367-2876289	96.15
sRNA_116	119	CP003351	2907883-2907993	AE016830	1513096-1513187	79.35
sRNA_116	119	CP003351	2907883-2907993	CP002491	1917572-1917663	79.35
sRNA_116	119	CP003351	2907883-2907993	CP002621	1335723-1335813	79.12
sRNA_116	119	CP003351	2907883-2907993	CP003504	990155-990055	78.22
sRNA_116	119	CP003351	2907883-2907993	CP003583	2651068-2651178	100
sRNA_116	119	CP003351	2907883-2907993	CP003726	1361840-1361931	79.35
sRNA_116	119	CP003351	2907883-2907993	CP004063	2588431-2588541	100
sRNA_116	119	CP003351	2907883-2907993	CP004081	1525618-1525709	79.35
sRNA_116	119	CP003351	2907883-2907993	CP004856	2384809-2384894	83.72
sRNA_116	119	CP003351	2907883-2907993	CP006030	2645920-2646030	100
sRNA_116	119	CP003351	2907883-2907993	CP006620	2947550-2947660	100
sRNA_116	119	CP003351	2907883-2907993	FP929058	918325-918416	79.35
sRNA_116	119	CP003351	2907883-2907993	HF558530	1362429-1362520	79.35
sRNA_117	105	CP003351	2951831-2951752	CP003504	928191-928266	94.74
sRNA_117	105	CP003351	2951831-2951752	CP003583	2694744-2694665	100
sRNA_117	105	CP003351	2951831-2951752	CP004063	2632109-2632030	100
sRNA_117	105	CP003351	2951831-2951752	CP004856	3423973-3423885	83.75
sRNA_117	105	CP003351	2951831-2951752	CP006030	2690414-2690335	100
sRNA_117	105	CP003351	2951831-2951752	CP006620	2991198-2991119	100
sRNA_118	93	CP003351	2952511-2952414	CP003583	2695424-2695327	100
sRNA_118	93	CP003351	2952511-2952414	CP004063	2632789-2632692	100
sRNA_118	93	CP003351	2952511-2952414	CP006030	2691094-2690997	100
sRNA_118	93	CP003351	2952511-2952414	CP006620	2991878-2991781	100

## Sheet: E. faecium AUS0004 top10
List of 10 most highly conserved E. faecium AUS0004 sRNAs
species are listed in the same order as in the heatmap in figure 4
species	accession number	sRNA_106	sRNA_025	sRNA_022	sRNA_055	sRNA_110	sRNA_026	sRNA_100	sRNA_044	sRNA_065	sRNA_068
E. faecium AUS0004	CP003351	100	100	100	100	100	100	100	100	100	100
E. faecium AUS00085	CP006620	100	100	100	100	100	100	100	100	97.4	100
E. faecium NRRL B-2354	CP004063	100	100	100	100	100	100	100	100	100	100
E. faecium DO	CP003583	100	100	100	100	100	100	100	100	100	100
E. faecium T110	CP006030	100	97.97	100	98.3	96.14	98.5	98.86	97	98.73	99.31
E. hirae ATCC 9790	CP003504	100	93.4	84.21	88.36	85.9	81.27	85	90.48	85.28	79.86
T. halophilus NBRC 12172	AP012046	93.75	66.04	58.36	74.67	73.81	78.16	72.09	73.68	x	81.94
E. casseliflavus EC20	CP004856	96.23	70.59	75.18	74.47	67.52	74.53	70.08	71.37	81.74	80.56
M. plutonius ATCC 35311	AP012200	91.15	87.86	75.37	72.41	68.8	55.04	58.77	59.77	62.71	x
M. plutonius DAT561	AP012282	91.15	87.86	75	72.41	69.23	55.04	58.54	59.77	62.71	x
E. faecalis 62	CP002491	90.27	89.53	82.01	79.31	70.94	69.23	66.8	65.35	64.53	80.56
E. faecalis D32	CP003726	90.27	89.53	82.01	79.31	70.94	70.16	66.8	65.74	64.53	80.56
E. faecalis DENG1	CP004081	90.27	87.36	82.01	79.31	70.94	69.77	66.8	65.35	64.53	80.56
E. faecalis str. Symbioflor 1	HF558530	90.27	89.53	81.65	79.31	70.94	69.38	67.58	65.35	64.1	80.56
E. faecalis OG1RF	CP002621	90.27	89.53	81.65	79.31	70.94	69.77	66.8	65.35	64.53	80.56
Enterococcus sp. 7L76	FP929058	90.27	89.53	82.01	79.31	70.94	69.11	67.19	65.23	64.53	80.56
E. faecalis V583	AE016830	90.27	89.53	82.01	79.31	70.94	70.16	67.19	65.34	64.53	80.56
